# Supplementary material
Source: HighWire-hosted journal article supplement (doi:10.1101/rna.080199.124)
Supplement: Supplemental_Information.xlsx [file Supplemental_Information.xlsx]

## Sheet: readme
In this file:
Table S1: Strains used in this study
Table S2: RBP target overlap summary: RNA-binding proteins that were assessed for overlapping RNA targets with Ssd1. Depicted in Figure 1B
Table S3: RBP target matrix: interactions represented in Figure 1A
Table S4: Colony size assay: data for each colony included in the dataset
Table S5: RBP colony size heatmap: values represented by heatmap in Figure 4B
Table S6: Liquid growth data: data represented in Figure 4C
Table S7: Network data: data represented in Figure 5
Table S8: Mean PARS scores represented in Figure 2A
Table S9: Median IUPRED scores represented in Figure 2B

## Sheet: 1. Strains
# Table S1: Strains used in this study
Name	Genotype	Source
AGY731	h-YPS1009 MATa; hoΔ::HYG	Hose et al. 2020
AGY735	h-YPS1009_Chr12.2n MATa; hoΔ::HYG	Hose et al. 2020
AGY1444	h-YPS1009 MATa; hoΔ::HYG; ssd1Δ::KAN	Hose et al. 2020
AGY1445	YPS1009_Chr12.2n MATa; hoΔ::HYG; ssd1Δ::KAN	Hose et al. 2020
AGY1559	d-YPS1009_Chr12.3n; ssd1::KANMX/SSD1	This study
AGY1602	d-YPS1009_Chr12.3n; hoΔ1/ hoΔ1; ssd1Δ::KanMX/SSD1	This study
AGY2151	d-YPS1009_Chr12.3n; ssd1Δ::KanMX/SSD1; ccr4Δ::HygMX/CCR4	This study
AGY2152	d-YPS1009_Chr12.3n; ssd1Δ::KanMX/SSD1; nab6Δ::HygMX/NAB6	This study
AGY2153	d-YPS1009_Chr12.3n; ssd1Δ::KanMX/SSD1; hek2Δ::HygMX/HEK2	This study
AGY2154	d-YPS1009_Chr12.3n; ssd1Δ::KanMX/SSD1; pub1Δ::HygMX/PUB1	This study
AGY2155	d-YPS1009_Chr12.3n; ssd1Δ::KanMX/SSD1; whi3Δ::HygMX/WHI3	This study
AGY2156	d-YPS1009_Chr12.3n; ssd1Δ::KanMX/SSD1; gbp2Δ::HygMX/GBP2	This study
AGY2157	d-YPS1009_Chr12.3n; ssd1Δ::KanMX/SSD1; mrn1Δ::HygMX/MRN1	This study
AGY2158	d-YPS1009_Chr12.3n; ssd1Δ::KanMX/SSD1; gis2Δ::HygMX/GIS2	This study
AGY2159	d-YPS1009_Chr12.3n; ssd1Δ::KanMX/SSD1; isw1Δ::HygMX/ISW1	This study
AGY2160	d-YPS1009_Chr12.3n; ssd1Δ::KanMX/SSD1; mpt5Δ::HygMX/MPT5	This study
AGY2161	d-YPS1009_Chr12.3n; ssd1Δ::KanMX/SSD1; puf6Δ::HygMX/PUF6	This study
AGY2162	d-YPS1009_Chr12.3n; ssd1Δ::KanMX/SSD1; she2Δ::HygMX/SHE2	This study
AGY2163	d-YPS1009_Chr12.3n; ssd1Δ::KanMX/SSD1; dhh1Δ::HygMX/DHH1	This study
AGY2164	d-YPS1009_Chr12.3n; ssd1Δ::KanMX/SSD1; pat1Δ::HygMX/PAT1	This study
AGY2165	h-YPS1009 MATa; hoΔ1; ccr4Δ::HygMX	This study
AGY2166	h-YPS1009_Chr12.2n MATa; hoΔ1; ccr4Δ::HygMX	This study
AGY2167	h-YPS1009 MATa; hoΔ1; ssd1Δ::KanMX; ccr4Δ::HygMX	This study
AGY2168	h-YPS1009_Chr12.2n MATa; hoΔ1; ssd1Δ::KanMX; ccr4Δ::HygMX	This study
AGY2169	h-YPS1009 MATa; hoΔ1; nab6Δ::HygMX	This study
AGY2170	h-YPS1009_Chr12.2n MATa; hoΔ1; nab6Δ::HygMX	This study
AGY2171	h-YPS1009 MATa; hoΔ1; ssd1Δ::KanMX; nab6Δ::HygMX	This study
AGY2172	h-YPS1009_Chr12.2n MATa; hoΔ1; ssd1Δ::KanMX; nab6Δ::HygMX	This study
AGY2173	h-YPS1009 MATa; hoΔ1; hek2Δ::HygMX	This study
AGY2174	h-YPS1009_Chr12.2n MATa; hoΔ1; hek2Δ::HygMX	This study
AGY2175	h-YPS1009 MATa; hoΔ1; ssd1Δ::KanMX; hek2Δ::HygMX	This study
AGY2176	h-YPS1009_Chr12.2n MATa; hoΔ1; ssd1Δ::KanMX; hek2Δ::HygMX	This study
AGY2177	h-YPS1009 MATa; hoΔ1; pub1Δ::HygMX	This study
AGY2178	h-YPS1009_Chr12.2n MATa; hoΔ1; pub1Δ::HygMX	This study
AGY2179	h-YPS1009 MATa; hoΔ1; ssd1Δ::KanMX; pub1Δ::HygMX	This study
AGY2180	h-YPS1009_Chr12.2n MATa; hoΔ1; ssd1Δ::KanMX; pub1Δ::HygMX	This study
AGY2181	h-YPS1009 MATa; hoΔ1; whi3Δ::HygMX	This study
AGY2182	h-YPS1009_Chr12.2n MATa; hoΔ1; whi3Δ::HygMX	This study
AGY2183	h-YPS1009 MATa; hoΔ1; ssd1Δ::KanMX; whi3Δ::HygMX	This study
AGY2184	h-YPS1009_Chr12.2n MATa; hoΔ1; ssd1Δ::KanMX; whi3Δ::HygMX	This study
AGY2185	h-YPS1009 MATa; hoΔ1; mpt5Δ::HygMX	This study
AGY2186	h-YPS1009_Chr12.2n MATa; hoΔ1; mpt5Δ::HygMX	This study
AGY2187	h-YPS1009 MATa; hoΔ1; ssd1Δ::KanMX; mpt5Δ::HygMX	This study
AGY2188	h-YPS1009 MATa; hoΔ1; puf6Δ::HygMX	This study
AGY2189	h-YPS1009_Chr12.2n MATa; hoΔ1; puf6Δ::HygMX	This study
AGY2190	h-YPS1009 MATa; hoΔ1; ssd1Δ::KanMX; puf6Δ::HygMX	This study
AGY2191	h-YPS1009_Chr12.2n MATa; hoΔ1; ssd1Δ::KanMX; puf6Δ::HygMX	This study
AGY2192	h-YPS1009 MATa; hoΔ1; pat1Δ::HygMX	This study
AGY2193	h-YPS1009_Chr12.2n MATa; hoΔ1; pat1Δ::HygMX	This study
AGY2194	h-YPS1009 MATa; hoΔ1; ssd1Δ::KanMX; pat1Δ::HygMX	This study
AGY2195	h-YPS1009_Chr12.2n MATa; hoΔ1; ssd1Δ::KanMX; pat1Δ::HygMX	This study

## Sheet: 2. RBP target overlap summary
# Table S2: RBP target overlap summary
# x = number of targets shared by Ssd1 and a given RBP of interest - 1
# m = total number of targets of the RBP of interest
# n = N - m # N is the total pool of transcripts considered (N = 5944)
# k = total number of Ssd1 targets, 286
# p.value = result from hypergeometric test < R phyper(x, m, n, k, lower.tail = FALSE) >
# (i/m)*Q = B-H critical value
ID	x	m	n	k	p.value	rank	(i/m)*Q	sig by FDR 0.05	name
YPL184C	52	341	5603	286	5.21e-15	1	0.00128205	TRUE	MRN1
YDR496C	16	44	5900	286	5.26e-12	2	0.0025641	TRUE	PUF6
YBL032W	90	1161	4783	286	2.83e-07	3	0.00384615	TRUE	HEK2
YAL021C	184	3001	2943	286	4.9e-07	4	0.00512821	TRUE	CCR4
YDL160C	208	3571	2373	286	1.71e-06	5	0.00641026	TRUE	DHH1
YKL130C	11	52	5892	286	4.47e-06	6	0.00769231	TRUE	SHE2
YNL197C	33	347	5597	286	4.66e-05	7	0.00897436	TRUE	WHI3
YCL011C	26	250	5694	286	5.66e-05	8	0.0102564	TRUE	GBP2
YNL255C	67	933	5011	286	0.000170325	9	0.0115385	TRUE	GIS2
YBR245C	106	1682	4262	286	0.000388896	10	0.0128205	TRUE	ISW1
YGL178W	112	1819	4125	286	0.000636732	11	0.0141026	TRUE	MPT5
YCR077C	29	368	5576	286	0.00284333	12	0.0153846	TRUE	PAT1
YML117W	7	55	5889	286	0.00440964	13	0.0166667	TRUE	NAB6
YNL016W	91	1513	4431	286	0.00538349	14	0.0179487	TRUE	PUB1
YPR042C	76	1311	4633	286	0.0267785	15	0.0192308	FALSE	PUF2
YHL034C	61	1035	4909	286	0.0332373	16	0.0205128	FALSE	SBP1
YLR145W	6	71	5873	286	0.053326	17	0.0217949	FALSE	RMP1
YMR080C	31	516	5428	286	0.0789619	18	0.0230769	FALSE	NAM7
YLL013C	100	1890	4054	286	0.10734	19	0.024359	FALSE	PUF3
YLR197W	21	349	5595	286	0.114854	20	0.025641	FALSE	NOP56
YLL032C	4	54	5890	286	0.116448	21	0.0269231	FALSE
YJL124C	11	196	5748	286	0.233584	22	0.0282051	FALSE	LSM1
YIR001C	2	37	5907	286	0.262349	23	0.0294872	FALSE	SGN1
YOR359W	19	359	5585	286	0.277849	24	0.0307692	FALSE	VTS1
YJL080C	72	1477	4467	286	0.416393	25	0.0320513	FALSE	SCP160
YGR192C	7	149	5795	286	0.427315	26	0.0333333	FALSE	TDH3
YLR116W	3	78	5866	286	0.521685	27	0.0346154	FALSE	MSL5
YGR159C	25	549	5395	286	0.566143	28	0.0358974	FALSE	NSR1
YOR198C	90	1952	3992	286	0.668625	29	0.0371795	FALSE	BFR1
YGL014W	26	625	5319	286	0.756125	30	0.0384615	FALSE	PUF4
YDR432W	46	1075	4869	286	0.793257	31	0.0397436	FALSE	NPL3
YGL122C	128	2847	3097	286	0.848388	32	0.0410256	FALSE	NAB2
YNL251C	40	976	4968	286	0.855319	33	0.0423077	FALSE	NRD1
YLR175W	3	126	5818	286	0.863532	34	0.0435897	FALSE	CBF5
YDR515W	16	515	5429	286	0.968212	35	0.0448718	FALSE	SLF1
YPL178W	3	183	5761	286	0.979423	36	0.0461539	FALSE	CBC2
YPL190C	7	346	5598	286	0.995176	37	0.0474359	FALSE	NAB3
YCL037C	23	805	5139	286	0.997815	38	0.048718	FALSE	SRO9
YER165W	54	1689	4255	286	0.999903	39	0.05	FALSE	PAB1

## Sheet: 3. RBP target matrix
# Table S3: RBP target matrix
# Matrix denoting physical interactions represented in Figure 1A. Columns represent RBPs of interest (common names used); rows represent RNAs (systematic names used). "1" indicates the presence of an interaction.
RNA	CCR4	MYO4	HEK2	PIN4	UBC4	SIF2	SHE3	PCS60	ISW1	GBP2	SRO9	PAT1	MDH3	YDL124W	DHH1	SSD1	PHO92	NPL3	PUF6	SLF1	PAB1	LOC1	PUF4	NAB2	MPT5	NSR1	TDH3	GCN5	ENO1	SBP1	SGN1	SCP160	LSM1	JSN1	SHE2	PUF3	YLL032C	MSL5	RMP1	CBF5	NOP56	SKI2	SEN1	NAB6	NAM7	RRP5	HRB1	PUB1	IDH1
HRA1	0	0	0	0	0	0	0	0	0	0	0	0	0	0	0	0	0	0	0	0	0	0	0	0	0	0	0	0	0	0	0	0	0	0	0	0	0	0	0	0	0	0	0	0	0	0	0	0	0
LSR1	0	0	0	0	0	0	0	0	0	0	0	0	0	0	0	0	0	0	0	0	0	0	0	0	0	0	0	0	0	0	0	0	0	0	0	1	0	0	0	0	0	0	0	0	0	0	0	0	0
NME1	0	0	0	0	0	0	0	0	0	0	0	0	0	0	0	0	0	0	0	0	0	0	0	0	0	0	0	0	0	0	0	0	0	0	0	0	0	0	1	0	0	0	0	0	0	0	0	0	0
NTS2-1	0	0	0	0	0	0	0	0	0	0	0	0	0	0	0	0	0	0	0	0	0	0	0	0	0	0	0	0	0	0	0	0	0	0	0	0	0	0	0	0	0	0	0	0	0	0	0	0	0
Q0020	0	0	0	0	0	0	0	0	0	0	0	0	0	0	1	0	0	0	0	0	0	0	0	0	0	0	0	0	0	0	0	0	0	0	0	0	0	0	0	0	0	0	0	0	0	0	0	0	0
Q0045	0	0	0	0	0	0	0	0	0	0	0	0	0	0	0	0	0	0	0	0	0	0	0	1	0	0	1	0	0	0	0	0	0	0	0	0	0	0	0	0	0	0	0	0	0	0	0	1	0
Q0050	0	0	0	0	0	0	0	0	0	0	0	0	0	0	0	0	0	0	0	0	0	0	0	1	0	0	0	0	0	0	0	0	0	0	0	0	0	0	0	0	0	0	0	0	0	0	0	0	0
Q0060	0	0	0	0	0	0	0	0	0	0	0	0	0	0	0	0	0	0	0	0	0	0	0	1	0	0	1	0	0	0	0	0	0	0	0	0	0	0	0	0	0	0	0	0	0	0	0	1	0
Q0065	0	0	0	0	0	0	0	0	0	0	0	0	0	0	0	0	0	0	0	0	0	0	0	1	0	0	1	0	0	0	0	0	0	0	0	0	0	0	0	0	0	0	0	0	0	0	0	1	0
Q0070	0	0	0	0	0	0	0	0	0	0	0	0	0	0	0	0	0	0	0	0	0	0	0	1	0	0	1	0	0	0	0	0	0	0	0	0	0	0	0	0	0	0	0	0	0	0	0	1	0
Q0075	0	0	0	0	0	0	0	0	0	0	0	0	0	0	0	0	0	0	0	0	0	0	0	1	0	0	1	0	0	0	0	0	0	0	0	0	0	0	0	0	0	0	0	0	0	0	0	1	0
Q0080	0	0	0	0	0	0	0	0	0	0	0	0	0	0	0	0	0	0	0	0	0	0	0	0	0	0	0	0	0	0	0	0	0	0	0	0	0	0	0	0	0	0	0	0	0	0	0	1	0
Q0085	0	0	0	0	0	0	0	0	0	0	0	0	0	0	0	0	0	0	0	0	0	0	0	0	0	0	1	0	0	0	0	0	0	0	0	0	0	0	0	0	0	0	0	0	0	0	0	1	0
Q0105	0	0	0	0	0	0	0	0	0	0	0	0	0	0	0	0	0	0	0	0	0	0	0	1	0	0	0	0	0	0	0	0	0	0	0	0	0	0	0	0	0	0	0	0	0	0	0	1	0
Q0110	0	0	0	0	0	0	0	0	0	0	0	0	0	0	0	0	0	0	0	0	0	0	0	1	0	0	1	0	0	0	0	0	0	0	0	0	0	0	0	0	0	0	0	0	0	0	0	1	0
Q0115	0	0	0	0	0	0	0	0	0	0	0	0	0	0	0	0	0	0	0	0	0	0	0	1	0	0	0	0	0	0	0	0	0	0	0	0	0	0	0	0	0	0	0	0	0	0	0	1	0
Q0120	0	0	0	0	0	0	0	0	0	0	0	0	0	0	0	0	0	0	0	0	0	0	0	1	0	0	1	0	0	0	0	0	0	0	0	0	0	0	0	0	0	0	0	0	0	0	0	1	0
Q0130	0	0	0	0	0	0	0	0	0	0	0	0	0	0	0	0	0	0	0	0	0	0	0	0	0	0	0	0	0	0	0	0	0	0	0	0	0	0	0	0	0	0	0	0	0	0	0	0	0
Q0140	0	0	0	0	0	0	0	0	0	0	0	0	0	0	0	0	0	0	0	0	0	0	0	1	0	0	0	0	0	0	0	0	0	0	0	0	0	0	0	0	0	0	0	0	0	0	0	0	0
Q0158	0	0	0	0	0	0	0	0	0	0	0	0	0	0	0	0	0	0	0	0	0	0	0	0	0	0	0	0	0	0	0	0	0	0	0	0	0	0	0	0	0	0	0	0	0	0	0	0	0
Q0160	0	0	0	0	0	0	0	0	0	0	0	0	0	0	0	0	0	0	0	0	0	0	0	1	0	0	0	0	0	0	0	0	0	0	0	0	0	0	0	0	0	0	0	0	0	0	0	0	0
Q0180	0	0	0	0	0	0	0	0	0	0	0	0	0	0	0	0	0	0	0	0	0	0	0	0	0	0	0	0	0	0	0	0	0	0	0	0	0	0	0	0	0	0	0	0	0	0	0	0	0
Q0183B	0	0	0	0	0	0	0	0	0	0	0	0	0	0	0	0	0	0	0	0	0	0	0	0	0	0	0	0	0	0	0	0	0	0	0	0	0	0	0	0	0	0	0	0	0	0	0	0	0
Q0185A	0	0	0	0	0	0	0	0	0	0	0	0	0	0	0	0	0	0	0	0	0	0	0	0	0	0	0	0	0	0	0	0	0	0	0	0	0	0	0	0	0	0	0	0	0	0	0	0	0
Q0185E	0	0	0	0	0	0	0	0	0	0	0	0	0	0	0	0	0	0	0	0	0	0	0	0	0	0	0	0	0	0	0	0	0	0	0	0	0	0	0	0	0	0	0	0	0	0	0	0	0
Q0185F	0	0	0	0	0	0	0	0	0	0	0	0	0	0	0	0	0	0	0	0	0	0	0	0	0	0	0	0	0	0	0	0	0	1	0	0	0	0	0	0	0	0	0	0	0	0	0	0	0
Q0185H	0	0	0	0	0	0	0	0	0	0	0	0	0	0	0	0	0	0	0	0	0	0	0	0	0	0	0	0	0	0	0	0	0	0	0	0	0	0	0	0	0	0	0	0	0	0	0	0	0
Q0195	0	0	0	0	0	0	0	0	0	0	0	0	0	0	0	0	0	0	0	0	0	0	0	0	0	0	0	0	0	0	0	0	0	0	0	0	0	0	0	0	0	0	0	0	0	0	0	0	0
Q0200	0	0	0	0	0	0	0	0	0	0	0	0	0	0	0	0	0	0	0	0	0	0	0	0	0	0	0	0	0	0	0	0	0	0	0	0	0	0	0	0	0	0	0	0	0	0	0	0	0
Q0205	0	0	0	0	0	0	0	0	0	0	0	0	0	0	0	0	0	0	0	0	0	0	0	0	0	0	0	0	0	0	0	0	0	0	0	0	0	0	0	0	0	0	0	0	0	0	0	0	0
Q0250	0	0	0	0	0	0	0	0	0	0	0	0	0	0	0	0	0	0	0	0	0	0	0	0	0	0	0	0	0	0	0	0	0	0	0	0	0	0	0	0	0	0	0	0	0	0	0	1	0
Q0255	0	0	0	0	0	0	0	0	0	0	0	0	0	0	0	0	0	0	0	0	0	0	0	1	0	0	0	0	0	0	0	0	0	0	0	0	0	0	0	0	0	0	0	0	0	0	0	0	0
Q0275	0	0	0	0	0	0	0	0	0	0	0	0	0	0	0	0	0	0	0	0	0	0	0	0	0	0	0	0	0	0	0	0	0	0	0	0	0	0	0	0	0	0	0	0	0	0	0	1	0
Q0280A	0	0	0	0	0	0	0	0	0	0	0	0	0	0	0	0	0	0	0	0	0	0	0	0	0	0	0	0	0	0	0	0	0	0	0	0	0	0	0	0	0	0	0	0	0	0	0	0	0
Q0280D	0	0	0	0	0	0	0	0	0	0	0	0	0	0	0	0	0	0	0	0	0	0	0	0	0	0	0	0	0	0	0	0	0	0	0	0	0	0	0	0	0	0	0	0	0	0	0	0	0
Q0280F	0	0	0	0	0	0	0	0	0	0	0	0	0	0	0	0	0	0	0	0	0	0	0	0	0	0	0	0	0	0	0	0	0	0	0	0	0	0	0	0	0	0	0	0	0	0	0	0	0
Q0283	0	0	0	0	0	0	0	0	0	0	0	0	0	0	0	0	0	0	0	0	0	0	0	0	0	0	0	0	0	0	0	0	0	0	0	0	0	0	0	0	0	0	0	0	0	0	0	0	0
Q0295	0	0	0	0	0	0	0	0	0	0	0	0	0	0	0	0	0	0	0	0	0	0	0	0	0	0	0	0	0	0	0	0	0	0	0	0	0	0	0	0	0	0	0	0	0	0	0	0	0
RDN18-2	0	0	0	0	0	0	0	0	0	0	0	0	0	0	0	0	0	0	0	0	0	0	0	0	0	0	0	0	0	0	0	0	0	0	0	0	0	0	0	0	0	0	0	0	0	1	0	0	0
RDN25-1	0	0	0	0	0	0	0	0	0	0	0	0	0	0	0	0	0	1	0	0	0	0	0	0	0	0	0	0	0	0	0	0	0	0	0	0	0	0	0	0	0	0	0	0	0	0	0	0	0
RDN25-2	0	0	0	0	0	0	0	0	0	0	0	0	0	0	0	0	0	1	0	0	0	0	0	0	0	0	0	0	0	0	0	0	0	0	0	0	0	0	0	0	0	0	0	0	0	0	0	0	0
RDN37-1	0	0	0	0	0	0	0	0	0	0	0	0	0	0	0	0	0	1	0	0	0	0	0	0	0	0	0	0	0	0	0	0	0	0	0	0	0	0	1	0	0	0	0	0	0	1	0	0	0
RDN37-2	0	0	0	0	0	0	0	0	0	0	0	0	0	0	0	0	0	1	0	0	0	0	0	0	0	0	0	0	0	0	0	0	0	0	0	0	0	0	0	0	0	0	0	0	0	1	0	0	0
RDN58-1	0	0	0	0	0	0	0	0	0	0	0	0	0	0	0	0	0	1	0	0	0	0	0	0	0	0	0	0	0	0	0	0	0	0	0	0	0	0	0	0	0	0	0	0	0	0	0	0	0
RDN58-2	0	0	0	0	0	0	0	0	0	0	0	0	0	0	0	0	0	1	0	0	0	0	0	0	0	0	0	0	0	0	0	0	0	0	0	0	0	0	0	0	0	0	0	0	0	0	0	0	0
SCR1	0	0	0	0	0	0	0	0	0	0	0	0	0	0	0	0	0	0	0	0	0	0	0	0	0	0	0	0	0	0	0	0	0	0	0	1	0	0	0	0	0	0	0	0	0	0	0	0	0
TLC1	0	0	0	0	0	0	0	0	0	0	0	0	0	0	0	0	0	0	0	0	0	0	0	0	1	0	0	0	0	0	0	0	0	0	0	0	0	0	0	0	0	0	0	0	0	0	0	0	0
YAL001C	1	0	0	0	0	0	0	0	1	0	0	0	0	0	1	0	0	0	0	0	0	0	0	0	1	0	0	0	0	0	0	0	0	0	0	1	0	0	0	0	0	0	0	0	0	0	0	0	0
YAL002W	1	0	0	0	0	0	0	0	1	0	0	0	0	0	0	0	0	0	0	0	0	0	0	0	0	0	0	0	0	0	0	0	0	0	0	0	0	0	0	0	0	0	0	0	0	0	0	0	0
YAL003W	0	0	0	0	0	0	0	0	0	0	0	1	0	0	1	0	0	0	0	0	1	0	0	1	1	0	0	0	0	1	0	0	1	0	0	1	0	0	0	0	0	0	0	0	0	0	0	0	0
YAL005C	0	0	0	0	0	0	0	0	0	0	0	1	0	0	1	0	0	0	0	0	0	0	0	1	0	0	0	0	0	1	0	0	1	0	0	1	0	0	0	0	0	0	0	0	0	0	0	0	0
YAL007C	0	0	0	0	0	0	0	0	0	0	1	0	0	0	0	0	0	0	0	0	1	0	0	1	0	1	0	0	0	0	0	0	0	0	0	0	0	0	0	0	0	0	0	0	0	0	0	0	0
YAL008W	0	0	0	0	0	0	0	0	0	0	1	0	0	0	0	0	0	0	0	0	0	0	0	1	0	0	0	0	0	0	0	1	0	0	0	0	0	0	0	0	0	0	0	0	0	0	0	0	0
YAL009W	1	0	0	0	0	0	0	0	0	0	0	0	0	0	1	0	0	0	0	0	0	0	0	0	1	0	0	0	0	0	0	0	0	0	0	0	0	0	0	0	0	0	0	0	0	0	0	0	0
YAL010C	1	0	0	0	0	0	0	0	0	0	0	1	0	0	1	0	0	0	0	0	0	0	0	0	0	0	0	0	0	0	0	0	0	0	0	0	0	0	0	0	0	0	0	0	0	0	0	0	0
YAL011W	1	0	0	0	0	0	0	0	0	0	0	0	0	0	1	1	0	0	0	0	0	0	1	0	1	0	0	0	0	0	0	0	0	0	0	1	0	0	0	0	0	0	0	0	0	0	0	0	0
YAL012W	0	0	0	0	0	0	0	0	0	0	0	0	0	0	1	0	0	0	0	0	1	0	0	1	0	0	0	0	0	1	0	1	0	0	1	0	0	0	0	0	0	0	0	0	0	0	0	0	0
YAL013W	1	0	0	0	0	0	0	0	0	1	0	0	0	0	1	0	0	1	0	0	0	0	0	0	1	1	0	0	0	0	0	0	0	0	0	0	0	0	0	0	0	0	0	0	0	0	0	0	0
YAL014C	1	0	0	0	0	0	0	0	0	0	0	0	0	0	0	0	0	0	0	0	1	0	0	0	1	1	0	0	0	0	0	0	0	0	0	0	0	0	0	0	0	0	0	0	0	0	0	1	0
YAL015C	0	0	0	0	0	0	0	0	0	0	0	0	0	0	1	1	0	0	0	0	0	0	0	1	0	0	0	0	0	0	0	0	0	0	0	0	0	0	0	0	0	0	0	0	0	0	0	0	0
YAL016W	0	0	0	0	0	0	0	0	0	0	0	0	0	0	1	0	0	0	0	0	0	0	0	0	0	0	0	0	0	0	0	1	0	0	0	0	0	0	0	0	0	0	0	0	0	0	0	0	0
YAL017W	1	0	0	0	0	0	0	0	1	0	0	0	0	0	0	0	0	0	0	0	0	0	0	1	0	0	0	0	0	0	0	0	0	0	0	1	0	0	0	0	0	0	0	0	0	0	0	0	0
YAL019W	0	0	0	0	0	0	0	0	1	0	0	0	0	0	0	0	0	0	0	0	0	0	0	1	0	0	0	0	0	1	0	1	0	0	0	0	0	0	0	0	0	0	0	0	0	0	0	0	0
YAL020C	1	0	0	0	0	0	0	0	0	0	0	0	0	0	1	1	0	0	0	0	0	0	0	0	0	1	0	0	0	0	0	0	0	0	0	0	0	0	0	0	0	0	0	0	0	0	0	0	0
YAL021C	0	0	1	0	0	0	0	0	0	0	0	0	0	0	0	0	0	0	0	0	0	0	1	1	0	0	0	0	0	0	0	1	0	0	0	0	0	0	0	0	0	0	0	0	0	0	0	1	0
YAL022C	0	0	0	0	0	0	0	0	0	0	0	0	0	0	0	0	0	0	0	0	0	0	0	0	0	0	0	0	0	0	0	0	0	0	0	0	0	0	0	0	1	0	0	0	0	0	0	0	0
YAL023C	0	0	0	0	0	0	0	0	0	0	1	1	0	0	1	1	0	0	0	0	0	0	0	0	1	0	0	0	0	0	0	1	0	0	1	1	0	0	0	0	1	0	0	0	0	0	0	0	0
YAL024C	1	0	0	0	0	0	0	0	1	0	0	0	0	0	1	0	0	0	0	0	0	0	0	0	0	0	0	0	0	0	0	0	0	0	0	0	0	0	0	0	0	0	0	0	0	0	0	0	0
YAL025C	1	0	0	0	0	0	0	0	0	1	1	0	0	0	1	1	0	0	0	0	0	0	1	1	1	0	0	0	0	0	0	0	0	0	0	0	0	0	0	0	0	0	0	0	0	0	0	0	0
YAL026C	0	0	0	0	0	0	0	0	1	0	0	0	0	0	1	0	0	0	0	0	0	0	0	0	0	0	0	0	0	1	0	1	0	0	0	0	0	0	0	0	0	0	0	0	0	0	0	0	0
YAL027W	1	0	0	0	0	0	0	0	0	0	1	0	0	0	1	0	0	1	0	0	1	0	0	1	1	0	0	0	0	0	0	0	0	0	0	1	0	0	0	0	0	0	0	0	0	0	0	0	0
YAL028W	0	0	1	0	0	0	0	0	1	0	0	0	0	0	0	0	0	0	0	0	0	0	0	1	0	0	0	0	0	0	0	0	0	0	0	1	0	0	0	0	0	0	0	0	0	0	0	0	0
YAL029C	1	0	0	0	0	0	0	0	1	0	0	0	0	0	1	0	0	0	0	0	0	0	0	0	0	0	0	0	0	0	0	0	0	0	0	1	1	0	0	0	0	0	0	0	0	0	0	0	0
YAL030W	1	0	0	0	0	0	0	0	0	0	1	0	0	0	1	0	0	1	0	1	1	0	0	1	0	1	0	0	0	0	0	0	0	0	0	0	0	0	0	0	0	0	0	0	0	0	0	0	0
YAL031C	1	0	1	0	0	0	0	0	1	0	0	0	0	0	1	0	0	0	0	0	0	0	0	1	0	0	0	0	0	0	0	0	0	0	0	0	0	0	0	0	0	0	0	0	0	0	0	0	0
YAL032C	1	0	0	0	0	0	0	0	0	0	1	0	0	0	1	0	0	0	0	0	0	0	0	0	1	0	0	0	0	0	0	0	0	0	0	0	0	0	0	0	0	0	0	0	0	0	0	0	0
YAL033W	1	0	0	0	0	0	0	0	0	0	1	0	0	0	0	0	0	0	0	0	1	0	0	1	0	0	0	0	0	0	0	0	0	0	0	0	0	0	0	0	0	0	0	0	0	0	0	0	0
YAL034C	0	0	1	0	0	0	0	0	0	0	0	0	0	0	0	0	0	0	0	0	0	0	0	0	0	0	0	0	0	0	0	0	0	0	0	0	0	0	0	0	0	0	0	0	0	0	0	1	0
YAL034W-A	1	0	0	0	0	0	0	0	0	0	0	0	0	0	1	0	0	0	0	0	0	0	0	0	1	0	0	0	0	0	0	1	0	0	0	0	0	0	0	0	0	0	0	0	0	0	0	0	0
YAL035W	0	0	0	0	0	0	0	0	0	1	0	0	0	0	1	0	0	0	0	0	0	0	1	1	1	0	0	0	0	1	0	1	0	0	0	1	0	0	0	0	0	0	0	0	0	0	0	0	0
YAL036C	0	0	0	0	0	0	0	0	0	0	1	0	0	0	0	0	0	0	0	0	0	0	0	0	0	0	0	0	0	0	0	0	0	0	0	1	0	0	0	0	0	0	0	0	0	0	0	0	0
YAL037W	0	0	0	0	0	0	0	0	0	0	0	0	0	0	0	0	0	0	0	0	0	0	0	0	0	0	0	0	0	0	0	0	0	0	0	0	0	0	0	0	0	0	0	0	1	0	0	0	0
YAL038W	0	0	0	0	0	0	0	0	0	0	0	1	0	0	1	0	0	0	0	0	0	0	0	0	0	0	0	0	0	1	0	0	1	0	0	1	0	0	0	0	0	0	0	0	0	0	0	0	0
YAL039C	1	0	0	0	0	0	0	0	0	0	0	0	0	0	1	0	0	1	0	0	0	0	0	0	0	1	0	0	0	0	0	0	0	0	0	1	0	0	0	0	0	0	0	0	0	0	0	0	0
YAL040C	1	0	1	0	0	0	0	0	1	0	0	0	0	0	1	0	0	0	1	0	0	0	0	0	0	0	0	0	0	0	0	0	0	0	0	0	0	0	0	0	1	0	0	0	0	0	0	1	0
YAL041W	1	0	1	0	0	0	0	0	1	0	0	0	0	0	1	0	0	0	0	0	0	0	0	0	0	0	0	0	0	0	0	0	0	0	0	0	0	0	0	0	0	0	0	0	0	0	0	0	0
YAL042W	0	0	0	0	0	0	0	0	0	0	0	0	0	0	0	0	0	0	0	0	0	0	0	1	0	1	0	0	0	1	0	1	0	0	0	1	0	0	0	0	1	0	0	0	0	0	0	0	0
YAL043C	1	0	1	0	0	0	0	0	1	0	0	0	0	0	1	0	0	0	0	0	0	0	0	1	0	0	0	0	0	0	0	0	0	0	0	0	0	0	0	0	0	0	0	0	0	0	0	0	0
YAL044C	1	0	0	0	0	0	0	0	0	0	1	0	0	0	1	0	0	0	0	0	1	0	1	1	1	1	0	0	0	0	0	0	0	0	0	1	0	0	0	0	0	0	0	0	0	0	0	0	0
YAL044W-A	0	0	0	0	0	0	0	0	0	0	1	0	0	0	0	0	0	1	0	0	1	0	0	1	0	1	0	0	0	0	0	0	0	0	0	0	0	0	0	0	0	0	0	0	0	0	0	1	0
YAL046C	1	0	0	0	0	0	0	0	0	0	0	0	0	0	1	0	0	0	0	0	1	0	0	1	1	0	0	0	0	0	0	0	0	0	0	1	0	0	0	0	0	0	0	0	0	0	0	1	0
YAL047C	1	0	0	0	0	0	0	0	0	0	0	0	0	0	1	0	0	0	0	0	0	0	0	0	0	0	0	0	0	0	0	0	0	0	0	0	0	0	0	0	0	0	0	0	0	0	0	0	0
YAL048C	1	0	0	0	0	0	0	0	1	0	0	1	0	0	1	0	0	0	0	0	0	0	0	0	0	0	0	0	0	0	0	0	0	0	0	0	0	0	0	0	0	0	0	0	0	0	0	0	0
YAL049C	1	0	0	0	0	0	0	0	0	0	1	0	0	0	0	0	0	0	0	0	1	0	0	0	0	0	0	0	0	0	0	0	0	0	0	0	0	0	0	0	0	0	0	0	0	0	0	0	0
YAL051W	1	0	1	0	0	0	0	0	1	0	0	0	0	0	1	0	0	0	0	0	0	0	0	0	0	0	0	0	0	0	0	0	0	0	0	0	0	0	0	0	0	0	0	0	0	0	0	1	0
YAL053W	0	0	1	0	0	0	0	0	1	0	0	0	0	0	1	0	0	0	0	0	0	0	0	0	0	0	0	0	0	0	0	1	0	0	0	1	0	0	0	0	1	0	0	0	0	0	0	0	0
YAL054C	0	0	0	0	0	0	0	0	0	0	0	0	0	0	0	0	0	0	0	0	0	0	0	0	0	0	0	0	0	0	0	0	0	0	0	0	0	0	0	0	0	0	0	0	0	0	0	1	0
YAL055W	1	0	0	0	0	0	0	0	0	0	1	0	0	0	0	0	0	0	0	0	0	0	0	0	1	0	0	0	0	0	0	0	0	0	0	0	0	0	0	0	0	0	0	0	0	0	0	0	0
YAL056W	1	0	0	0	0	0	0	0	1	0	0	1	0	0	1	0	0	0	0	0	0	0	0	0	0	0	0	0	0	0	0	0	0	0	0	1	0	0	0	0	0	0	0	0	0	0	0	0	0
YAL058W	1	0	0	0	0	0	0	0	0	0	0	0	0	0	0	0	0	0	0	0	1	0	0	0	0	0	0	0	0	0	0	0	0	0	0	0	0	0	0	0	0	0	0	0	0	0	0	0	0
YAL059W	1	0	0	0	0	0	0	0	0	0	0	0	0	0	1	0	0	1	0	0	1	0	1	0	1	1	0	0	0	0	0	0	0	0	0	0	0	0	0	0	0	0	0	0	0	0	0	1	0
YAL060W	1	0	0	0	0	0	0	0	0	0	0	0	0	0	1	0	0	0	0	0	1	0	0	1	1	1	0	0	0	0	0	0	0	0	0	0	0	0	0	0	0	0	0	0	0	0	0	0	0
YAL061W	1	0	0	0	0	0	0	0	0	0	0	0	0	0	0	0	0	0	0	0	0	0	0	1	0	1	0	0	0	0	0	0	0	0	0	0	0	1	0	0	0	0	0	0	0	0	0	0	0
YAL062W	0	0	0	0	0	0	0	0	0	0	0	0	0	0	0	0	0	0	0	0	0	0	0	1	1	0	0	0	0	0	0	0	0	0	0	0	0	0	0	0	0	0	0	0	0	0	0	0	0
YAL063C	0	0	1	0	0	0	0	0	1	0	0	0	0	0	0	0	0	0	0	0	0	0	0	0	0	0	0	0	0	0	0	0	0	0	0	1	0	0	0	0	0	0	0	0	1	0	0	0	0
YAL063C-A	0	0	0	0	0	0	0	0	0	0	0	0	0	0	0	0	0	0	0	0	0	0	0	0	0	0	0	0	0	0	0	0	0	0	0	0	0	0	0	0	0	0	0	0	1	0	0	0	0
YAL064C-A	0	0	1	0	0	0	0	0	0	0	0	0	0	0	0	0	0	0	0	0	0	0	0	0	0	0	0	0	0	0	0	0	0	0	0	0	0	0	0	0	0	0	0	0	0	0	0	0	0
YAL064W-B	0	0	1	0	0	0	0	0	1	0	0	0	0	0	0	0	0	0	0	0	0	0	0	0	0	0	0	0	0	0	0	0	0	0	0	0	0	0	0	0	0	0	0	0	0	0	0	0	0
YAL065C	0	0	1	0	0	0	0	0	0	0	0	0	0	0	0	0	0	0	0	0	0	0	0	0	0	0	0	0	0	0	0	0	0	0	0	0	0	0	0	0	0	0	0	0	0	0	0	0	0
YAL068C	0	0	1	0	0	0	0	0	0	0	0	0	0	0	0	0	0	0	0	0	0	0	0	0	0	0	0	0	0	0	0	0	0	0	0	0	0	0	0	0	0	0	0	0	1	0	0	0	0
YAR002C-A	0	0	0	0	0	0	0	0	0	0	1	0	0	0	0	0	0	0	0	0	1	0	0	1	1	0	0	0	0	0	0	0	0	0	0	0	0	0	0	0	0	0	0	0	0	0	0	0	0
YAR002W	1	0	0	0	0	0	0	0	0	0	0	0	0	0	0	0	0	0	0	0	0	0	0	1	0	0	0	0	0	1	0	1	0	0	0	0	0	0	0	0	0	0	0	0	0	0	0	0	0
YAR003W	1	0	0	0	0	0	0	0	1	0	0	0	0	0	1	0	0	0	0	0	0	0	0	0	0	0	0	0	0	0	0	0	0	0	0	0	0	0	0	0	0	0	0	0	0	0	0	0	0
YAR007C	0	0	0	0	0	0	0	0	0	0	1	0	0	0	0	0	0	0	0	0	0	0	1	1	1	0	0	0	0	0	0	1	0	0	0	0	0	0	0	0	0	0	0	0	0	0	0	0	0
YAR008W	1	0	0	0	0	0	0	0	0	0	0	0	0	0	1	1	0	0	0	0	0	0	0	0	1	1	0	0	0	0	0	0	0	0	0	0	0	0	0	0	0	0	0	0	0	0	0	0	0
YAR009C	0	0	1	0	0	0	0	0	0	0	0	0	0	0	0	0	0	0	0	0	0	0	0	0	0	0	0	0	0	0	0	0	0	0	0	0	0	0	0	0	0	0	0	0	0	0	0	0	0
YAR010C	0	0	1	0	0	0	0	0	0	0	0	0	0	0	0	0	0	0	0	0	0	0	0	0	0	0	0	0	0	0	0	0	0	0	0	0	0	0	0	0	0	0	0	0	0	0	0	0	0
YAR014C	1	0	0	0	0	0	0	0	1	0	0	0	0	0	1	1	0	0	0	0	0	0	0	0	0	0	0	0	0	0	0	0	0	0	0	0	0	0	0	0	0	0	0	0	0	0	0	0	0
YAR015W	1	0	0	0	0	0	0	0	0	0	0	0	0	0	0	0	0	0	0	0	0	0	0	1	0	0	0	0	0	0	0	0	0	0	0	0	0	0	0	0	0	0	0	0	0	0	0	0	0
YAR018C	1	0	0	0	0	0	0	0	0	0	0	0	0	0	0	0	0	0	0	0	0	0	0	0	0	0	0	0	0	0	0	0	0	0	0	0	0	0	0	0	0	0	0	0	0	0	0	0	0
YAR019C	1	0	1	0	0	0	0	0	1	0	0	0	0	0	0	0	0	0	0	0	0	0	0	1	0	0	0	0	0	0	0	0	0	0	0	0	0	0	0	0	0	0	0	0	0	0	0	0	0
YAR023C	0	0	0	0	0	0	0	0	1	0	0	0	0	0	0	0	0	0	0	0	0	0	0	0	0	0	0	0	0	0	0	0	0	0	0	0	0	0	0	0	0	0	0	0	1	0	0	0	0
YAR027W	1	0	0	0	0	0	0	0	0	0	1	0	0	0	0	0	0	1	0	1	1	0	0	1	0	0	0	0	0	0	0	0	0	0	0	0	0	0	0	1	0	0	0	0	0	0	0	1	0
YAR028W	1	0	0	0	0	0	0	0	0	0	0	0	0	0	1	0	0	0	0	0	1	0	0	0	0	0	0	0	0	0	0	0	0	0	0	0	0	0	0	0	0	0	0	0	0	0	0	1	0
YAR029W	0	0	0	0	0	0	0	0	0	0	0	0	0	0	0	0	0	0	0	0	0	0	0	0	0	0	0	0	0	0	0	0	0	0	0	0	0	0	0	0	0	0	0	0	1	0	0	0	0
YAR031W	1	0	0	0	0	0	0	0	0	0	0	0	0	0	1	0	0	0	0	0	0	0	0	1	0	0	0	0	0	0	0	0	0	0	0	0	0	0	0	0	0	0	0	0	0	0	0	0	0
YAR033W	0	0	0	0	0	0	0	0	0	0	1	0	0	0	1	0	0	1	0	1	1	0	0	1	0	0	0	0	0	0	0	0	0	0	0	0	0	0	0	0	0	0	0	0	0	0	0	1	0
YAR035W	0	0	1	0	0	0	0	0	0	0	0	0	0	0	1	0	0	0	0	0	0	0	0	0	0	0	0	0	0	0	0	0	0	0	0	0	0	0	0	0	0	0	0	0	0	0	0	0	0
YAR042W	1	0	1	0	0	0	0	0	1	0	0	0	0	0	1	0	0	0	0	0	0	0	0	1	0	0	0	0	0	1	0	0	0	0	0	0	0	0	0	0	1	0	0	0	0	0	0	0	0
YAR043C	0	0	1	0	0	0	0	0	0	0	0	0	0	0	0	0	0	0	0	0	0	0	0	0	0	0	0	0	0	0	0	0	0	0	0	0	0	0	0	0	0	0	0	0	0	0	0	0	0
YAR047C	0	0	1	0	0	0	0	0	0	0	0	0	0	0	0	0	0	0	0	0	0	0	0	0	0	0	0	0	0	0	0	0	0	0	0	0	0	0	0	0	0	0	0	0	0	0	0	0	0
YAR050W	0	0	1	0	0	0	0	0	1	0	0	0	0	0	0	0	0	0	0	0	1	0	0	1	0	0	0	0	0	0	0	0	0	0	0	0	0	0	0	0	0	0	0	0	1	0	0	1	0
YAR052C	0	0	1	0	0	0	0	0	0	0	0	0	0	0	0	0	0	0	0	0	0	0	0	0	0	0	0	0	0	0	0	0	0	0	0	0	0	0	0	0	0	0	0	0	0	0	0	0	0
YAR061W	0	0	1	0	0	0	0	0	0	0	0	0	0	0	0	0	0	0	0	0	0	0	0	0	0	0	0	0	0	0	0	0	0	0	0	0	0	0	0	0	0	0	0	0	0	0	0	0	0
YAR062W	0	0	1	0	0	0	0	0	0	0	0	0	0	0	0	0	0	0	0	0	0	0	0	0	0	0	0	0	0	0	0	0	0	0	0	0	0	0	0	0	0	0	0	0	0	0	0	0	0
YAR066W	0	0	1	0	0	0	0	0	0	0	0	0	0	0	0	0	0	0	0	0	0	0	0	0	0	0	0	0	0	0	0	0	0	0	0	0	0	0	0	0	1	0	0	0	0	0	0	0	0
YAR068W	0	0	0	0	0	0	0	0	1	1	0	0	0	0	0	0	0	0	0	0	0	0	0	0	0	0	0	0	0	0	0	0	0	0	0	0	0	0	0	0	1	0	0	0	1	0	0	0	0
YAR071W	0	0	0	0	0	0	0	0	0	0	0	0	0	0	1	0	0	0	0	0	1	0	0	0	0	0	1	0	0	0	0	1	0	0	0	0	1	0	0	0	0	0	0	0	0	0	0	0	0
YAR075W	0	0	0	0	0	0	0	0	0	0	0	0	0	0	0	0	0	0	0	0	0	0	0	0	0	0	0	0	0	0	0	1	0	0	0	0	0	0	0	0	0	0	0	0	0	0	0	0	0
YBL001C	1	0	0	0	0	0	0	0	0	0	1	0	0	0	1	0	0	1	0	1	1	0	0	1	0	1	0	0	0	0	0	0	0	0	0	0	0	0	0	0	0	0	0	0	0	0	0	0	0
YBL002W	0	0	0	0	0	0	0	0	0	0	1	0	0	0	1	0	0	1	0	1	1	0	1	1	1	1	0	0	0	0	0	0	1	0	0	1	0	0	0	0	0	0	0	0	0	0	0	1	0
YBL003C	1	0	0	0	0	0	0	0	0	0	1	1	0	0	1	0	0	0	0	1	1	0	1	1	1	0	0	0	0	1	0	0	0	0	0	0	0	0	0	0	0	0	0	0	0	0	0	1	0
YBL004W	0	0	0	0	0	0	0	0	1	0	0	0	0	0	1	0	0	0	0	0	0	0	1	1	1	0	0	0	0	1	0	1	0	0	0	1	0	0	0	0	0	0	0	0	0	0	0	0	0
YBL005W	1	0	1	0	0	0	0	0	1	0	0	0	0	0	1	0	0	0	0	0	0	0	0	1	0	0	0	0	0	0	0	0	0	0	0	0	0	0	0	0	0	0	0	0	1	0	0	0	0
YBL005W-A	0	0	1	0	0	0	0	0	0	0	0	0	0	0	0	0	0	0	0	0	0	0	0	0	0	0	0	0	0	0	0	0	0	0	0	0	0	0	0	0	0	0	0	0	0	0	0	0	0
YBL005W-B	1	0	0	0	0	0	0	0	0	0	0	0	0	0	0	0	0	0	0	0	0	0	0	0	0	0	0	0	0	0	0	0	0	0	0	0	0	0	0	0	0	0	0	0	0	0	0	0	0
YBL006C	1	0	0	0	0	0	0	0	0	1	1	0	0	0	1	0	0	1	0	1	1	0	1	1	1	1	0	0	0	0	0	0	0	0	0	0	0	0	0	1	0	0	0	0	0	0	0	0	0
YBL007C	0	0	1	0	0	0	0	0	1	0	0	0	0	0	1	0	0	0	0	0	0	0	1	0	1	0	0	0	0	1	0	1	0	0	0	0	0	0	0	0	0	0	0	0	0	0	0	0	0
YBL008W	0	0	0	0	0	0	0	0	1	0	0	0	0	0	0	0	0	0	0	0	0	0	0	0	0	0	0	0	0	0	0	0	0	0	0	1	0	0	0	0	0	0	0	0	0	0	0	0	0
YBL008W-A	0	0	0	0	0	0	0	0	0	0	0	0	0	0	0	0	0	0	0	0	0	0	0	0	0	0	0	0	0	0	0	0	0	0	0	1	0	0	0	0	0	0	0	0	0	0	0	0	0
YBL009W	0	0	0	0	0	0	0	0	1	0	0	0	0	0	0	0	0	0	0	0	0	0	0	0	0	0	0	0	0	0	0	0	0	0	0	0	0	0	0	0	0	0	0	0	0	0	0	0	0
YBL010C	0	0	0	0	0	0	0	0	0	0	1	0	0	0	1	0	0	0	0	0	0	0	0	1	0	0	0	0	0	0	0	0	0	0	0	0	0	0	0	0	0	0	0	0	0	0	0	0	0
YBL011W	0	0	0	0	0	0	0	0	1	0	0	0	0	0	0	0	0	0	0	0	0	0	0	0	1	0	0	0	0	0	0	0	0	0	0	1	0	0	0	0	1	0	0	0	0	0	0	0	0
YBL013W	0	0	0	0	0	0	0	0	1	0	0	0	0	0	0	0	0	0	0	0	0	0	0	0	0	0	0	0	0	0	0	0	0	0	0	0	0	0	0	0	0	0	0	0	0	0	0	0	0
YBL014C	1	0	0	0	0	0	0	0	1	0	0	0	0	0	1	0	0	0	0	0	0	0	0	1	1	0	0	0	0	0	0	0	0	0	0	1	0	0	0	0	0	0	0	0	0	0	0	0	0
YBL015W	1	0	0	0	0	0	0	0	0	0	0	0	0	0	0	0	0	0	0	0	0	0	0	0	0	0	0	0	0	0	0	0	0	0	0	0	0	0	0	0	0	0	0	0	0	0	0	0	0
YBL016W	0	0	0	0	0	0	0	0	0	0	0	0	0	0	0	0	0	1	0	0	0	0	0	0	0	0	0	0	0	1	0	1	0	0	1	0	0	0	0	1	0	0	0	0	0	0	0	0	0
YBL017C	0	0	0	0	0	0	0	0	1	0	0	0	0	0	1	0	0	0	0	0	1	0	0	1	1	0	0	0	0	1	0	1	0	0	0	1	0	0	0	0	0	0	0	0	0	0	0	0	0
YBL018C	0	0	0	0	0	0	0	0	0	0	0	0	0	0	0	0	0	0	0	0	1	0	0	0	0	0	0	0	0	0	0	0	0	0	0	1	0	0	0	0	0	0	0	0	0	0	0	0	0
YBL019W	1	0	0	0	0	0	0	0	0	0	0	0	0	0	0	0	0	0	0	0	0	0	0	0	0	0	0	0	0	0	0	0	0	0	0	0	0	0	0	0	0	0	0	0	0	0	0	0	0
YBL020W	1	0	0	0	0	0	0	0	1	0	0	0	0	0	1	0	0	0	0	0	0	0	0	0	0	0	1	0	0	0	0	1	0	0	0	0	0	1	0	0	0	0	0	0	0	0	0	1	0
YBL021C	1	0	0	0	0	0	0	0	0	0	0	0	0	0	1	0	0	0	0	0	1	0	0	0	1	1	0	0	0	0	0	0	0	0	0	1	0	0	0	0	0	0	0	0	0	0	0	0	0
YBL022C	0	0	0	0	0	0	0	0	1	0	0	0	0	0	1	0	0	0	0	0	0	0	0	0	0	0	0	0	0	1	0	1	0	0	0	1	0	0	0	0	0	0	0	0	0	0	0	0	0
YBL023C	0	0	0	0	0	0	0	0	0	0	0	0	0	0	0	0	0	0	0	0	0	0	1	1	1	0	0	0	0	1	0	0	0	0	0	0	0	0	0	0	0	0	0	0	0	0	0	1	0
YBL024W	0	0	0	0	0	0	0	0	0	0	0	0	0	0	1	0	0	0	0	0	0	0	1	0	0	0	0	0	0	1	0	1	0	0	0	1	0	0	0	0	0	0	0	0	0	0	0	0	0
YBL025W	0	0	0	0	0	0	0	0	0	0	1	0	0	0	1	0	0	0	0	0	1	0	0	1	0	1	0	0	0	0	0	0	0	0	0	0	0	0	0	0	0	0	0	0	1	0	0	0	0
YBL026W	0	0	0	0	0	0	0	0	0	0	0	0	0	0	1	0	0	1	0	0	1	0	0	1	1	1	0	0	0	0	0	0	0	0	0	0	0	1	0	0	0	0	0	0	0	0	0	1	0
YBL027W	0	0	0	0	0	0	0	0	0	0	1	0	0	0	1	0	0	1	0	1	1	0	1	1	1	1	0	0	0	0	0	0	0	0	0	1	0	0	0	0	0	0	0	0	0	0	0	0	0
YBL028C	1	0	0	0	0	0	0	0	0	0	1	0	0	0	1	0	0	1	0	1	1	0	1	1	1	0	0	0	0	0	0	0	0	0	0	1	0	0	0	0	0	0	0	0	0	0	0	0	0
YBL029C-A	0	0	0	0	0	0	0	0	0	0	0	0	0	0	0	0	0	1	0	0	1	0	0	0	0	0	0	0	0	0	0	0	0	0	0	0	0	0	0	0	0	0	0	0	0	0	0	0	0
YBL029W	1	0	0	0	0	0	0	0	0	0	0	1	0	0	1	0	0	0	0	0	0	0	0	1	0	0	0	0	0	0	0	0	0	0	0	0	0	0	0	0	0	0	0	0	0	0	0	0	0
YBL030C	0	0	0	0	0	0	0	0	0	0	0	0	0	0	1	0	0	0	0	0	0	0	0	0	0	0	0	0	0	1	0	1	0	0	0	1	0	0	0	0	0	0	0	0	0	0	0	1	0
YBL031W	1	0	1	0	0	0	0	0	0	0	0	0	0	0	1	0	0	1	0	0	0	0	0	0	0	0	0	0	0	0	0	0	0	0	0	0	0	0	0	0	0	0	0	0	1	0	0	0	0
YBL032W	0	0	1	0	0	0	0	0	0	0	0	0	0	0	1	0	0	0	0	0	0	0	0	1	0	0	0	0	0	0	0	1	0	0	0	0	0	0	0	0	0	0	0	0	0	0	0	0	0
YBL033C	1	0	0	0	0	0	0	0	0	0	0	0	0	0	1	0	0	0	0	0	0	0	0	0	0	0	0	0	0	0	0	0	0	0	0	0	0	1	0	0	0	0	0	0	0	0	0	0	0
YBL034C	1	0	0	0	0	0	0	0	0	0	0	0	0	0	0	0	0	0	0	0	0	0	0	1	1	0	0	0	0	1	0	0	0	0	0	0	0	0	0	0	0	0	0	0	0	0	0	1	0
YBL035C	0	0	0	0	0	0	0	0	1	0	0	0	0	0	0	0	0	0	0	0	0	0	1	1	0	0	0	0	0	0	0	0	0	0	0	0	0	0	0	0	0	0	0	0	0	0	0	0	0
YBL036C	0	0	0	0	0	0	0	0	0	0	0	0	0	0	1	0	0	0	0	0	0	0	0	0	0	1	0	0	0	0	0	0	0	0	0	0	0	0	0	0	0	0	0	0	0	0	0	0	0
YBL037W	1	0	0	0	0	0	0	0	1	0	0	0	0	0	1	0	0	0	0	0	0	0	0	1	0	0	0	0	0	0	0	0	0	0	0	0	0	0	0	0	0	0	0	0	1	0	0	0	0
YBL038W	1	0	0	0	0	0	0	0	0	0	1	0	0	0	1	0	0	0	0	0	1	0	0	1	1	1	0	0	0	0	0	0	0	0	0	1	0	0	0	0	0	0	0	0	0	0	0	0	0
YBL039C	0	0	0	0	0	0	0	0	0	0	0	0	0	0	1	0	0	0	0	0	0	0	1	0	0	0	0	0	0	1	0	1	1	0	0	0	0	0	0	0	0	0	0	0	0	0	0	1	0
YBL039W-A	0	0	0	0	0	0	0	0	0	0	0	0	0	0	0	0	0	1	0	0	1	0	0	0	0	0	0	0	0	0	0	0	0	0	0	0	0	0	0	0	0	0	0	0	0	0	0	1	0
YBL039W-B	0	0	0	0	0	0	0	0	0	0	0	0	0	0	0	0	0	0	0	0	0	0	0	1	0	0	0	0	0	0	0	0	0	0	0	0	0	0	0	0	0	0	0	0	1	0	0	0	0
YBL040C	0	0	0	0	0	0	0	0	0	0	0	0	0	0	0	0	0	0	0	1	1	0	0	0	0	0	0	0	0	0	0	0	0	0	0	0	0	0	0	0	0	0	0	0	0	0	0	1	0
YBL041W	0	0	0	0	0	0	0	0	0	0	0	0	0	0	1	0	0	0	0	0	1	0	0	1	0	1	0	0	0	0	0	0	0	0	0	0	0	0	0	0	0	0	0	0	0	0	0	0	0
YBL042C	0	0	0	0	0	0	0	0	1	0	0	0	0	0	0	0	0	0	0	0	0	0	1	0	1	1	0	0	0	0	0	1	0	0	0	0	0	0	0	0	0	0	0	0	0	0	0	0	0
YBL043W	0	0	1	0	0	0	0	0	0	0	0	1	0	0	0	1	0	0	0	0	0	0	0	0	0	0	0	0	0	0	0	0	0	0	0	0	0	0	0	0	0	0	0	0	1	0	0	0	0
YBL045C	0	0	0	0	0	0	0	0	0	0	0	0	0	0	0	0	0	1	0	0	0	0	0	1	0	0	0	0	0	1	0	1	0	0	0	1	0	0	0	0	0	0	0	0	0	0	0	0	0
YBL046W	1	0	0	0	0	0	0	0	0	1	0	0	0	0	1	0	0	0	0	0	0	0	0	0	0	0	0	0	0	0	0	0	0	0	0	1	0	0	0	0	0	0	0	0	0	0	0	0	0
YBL047C	1	0	1	0	0	0	0	0	1	0	0	0	0	0	1	0	0	1	0	0	0	0	1	1	1	0	0	0	0	1	0	1	0	0	0	0	0	0	0	0	1	0	0	0	0	0	0	0	0
YBL049W	0	0	0	0	0	0	0	0	0	0	0	0	0	0	0	0	0	0	0	0	0	0	0	1	0	0	0	0	0	0	0	0	0	0	0	0	0	0	0	0	0	0	0	0	0	0	0	0	0
YBL050W	1	0	0	0	0	0	0	0	0	0	1	0	0	0	1	0	0	0	0	0	0	0	0	1	0	0	0	0	0	0	0	0	0	0	0	0	0	0	0	0	0	0	0	0	0	0	0	0	0
YBL051C	1	0	1	1	0	0	0	0	0	0	0	1	0	0	1	1	0	0	0	0	0	0	0	0	1	0	0	0	0	1	0	1	0	0	0	0	0	0	0	0	0	0	0	0	0	0	0	1	0
YBL052C	1	0	0	0	0	0	0	0	1	0	0	0	0	0	1	1	0	0	0	0	0	0	0	1	1	0	0	0	0	0	0	0	0	0	0	0	0	0	0	0	0	0	0	0	0	0	0	0	0
YBL054W	1	0	1	0	0	0	0	0	1	0	0	0	0	0	1	0	0	0	0	0	0	0	0	0	1	0	0	0	0	0	0	1	0	0	0	0	0	0	0	0	0	0	0	0	0	0	0	0	0
YBL055C	0	0	0	0	0	0	0	0	0	0	0	0	0	0	1	0	0	0	0	0	0	0	0	0	1	0	0	0	0	0	0	0	0	0	0	0	0	0	0	0	0	0	0	0	0	0	0	0	0
YBL056W	1	0	0	0	0	0	0	0	0	0	0	0	0	0	1	0	0	0	0	0	0	0	0	1	0	0	0	0	0	1	0	0	0	0	0	0	0	0	0	0	0	0	0	0	0	0	0	0	0
YBL057C	1	0	0	0	0	0	0	0	0	0	0	0	0	0	0	0	0	0	0	0	1	0	0	0	0	1	0	0	0	0	0	0	0	0	0	0	0	0	0	0	0	0	0	0	0	0	0	0	0
YBL058W	0	0	0	0	0	0	0	0	0	0	0	0	0	0	1	0	0	0	0	0	0	0	0	1	0	1	0	0	0	0	0	1	0	0	0	0	0	0	0	0	1	0	0	0	0	0	0	0	0
YBL059C-A	0	0	0	0	0	0	0	0	0	0	0	0	0	0	0	0	0	0	0	0	1	0	0	1	0	0	0	0	0	0	0	0	0	0	0	1	0	0	0	0	0	0	0	0	0	0	0	0	0
YBL059W	1	0	0	0	0	0	0	0	0	0	1	0	0	0	0	0	0	1	0	1	0	0	0	0	0	0	0	0	0	0	0	0	0	0	0	1	0	0	0	0	0	0	0	0	0	0	0	0	0
YBL060W	1	0	0	0	0	0	0	0	1	0	0	0	0	0	1	0	0	0	0	0	0	0	0	0	0	0	0	0	0	0	0	0	0	0	0	1	0	0	0	0	0	0	0	0	0	0	0	0	0
YBL061C	1	0	0	0	0	0	0	0	1	0	0	0	0	0	1	0	0	0	0	0	0	0	0	0	0	0	0	0	0	0	0	1	0	0	0	1	0	0	0	0	0	0	0	0	0	0	0	0	0
YBL063W	1	0	0	0	0	0	0	0	1	0	0	0	0	0	1	0	0	0	0	0	0	0	1	0	1	0	0	0	0	0	0	0	0	0	0	0	0	0	0	0	0	0	0	0	0	0	0	0	0
YBL064C	0	0	0	0	0	0	0	0	0	0	0	0	0	0	0	0	0	0	0	0	1	0	0	1	0	0	0	0	0	1	0	0	0	0	0	0	0	0	0	0	0	0	0	0	0	0	0	1	0
YBL066C	1	0	0	0	0	0	0	0	0	0	0	0	0	0	1	0	0	0	0	0	0	0	0	1	1	0	0	0	0	0	0	0	0	0	0	0	0	0	0	0	0	0	0	0	0	0	0	0	0
YBL067C	1	0	0	0	0	0	0	0	1	0	0	0	0	0	1	1	0	0	0	0	0	0	0	1	1	0	0	0	0	0	0	0	0	0	0	0	0	0	0	0	0	0	0	0	0	0	0	0	0
YBL068W	0	0	0	0	0	0	0	0	0	0	1	0	0	0	1	0	0	0	0	1	1	0	0	1	0	0	0	0	0	0	0	0	0	0	0	1	0	0	0	0	0	0	0	0	0	0	0	1	0
YBL069W	0	0	0	0	0	0	0	0	0	0	1	0	0	0	0	0	0	0	0	0	0	0	0	0	1	0	0	0	0	0	0	0	0	0	0	0	0	0	0	0	0	0	0	0	0	0	0	0	0
YBL070C	0	0	0	0	0	0	0	0	0	0	0	0	0	0	0	0	0	0	0	0	0	0	0	0	0	0	0	0	0	0	0	0	0	0	0	0	0	0	0	0	0	0	0	0	0	0	0	0	0
YBL071C-B	0	0	0	0	0	0	0	0	0	0	0	0	0	0	1	0	0	0	0	0	0	0	0	0	0	0	0	0	0	1	0	0	0	0	0	0	0	0	0	0	0	0	0	0	0	0	0	0	0
YBL071W-A	0	0	0	0	0	0	0	0	0	0	0	0	0	0	0	0	0	1	0	0	1	0	0	0	0	1	0	0	0	0	0	0	0	0	0	0	0	0	0	0	0	0	0	0	0	0	0	0	0
YBL072C	0	0	0	0	0	0	0	0	0	0	1	0	0	0	1	0	0	0	0	1	1	0	0	1	1	0	0	0	0	0	0	0	0	0	0	1	0	0	0	0	0	0	0	0	0	0	0	1	0
YBL074C	0	0	0	0	0	0	0	0	1	0	0	0	0	0	0	0	0	0	0	0	0	0	0	0	0	0	0	0	0	0	0	0	0	0	0	0	0	0	0	0	0	0	0	0	0	0	0	0	0
YBL075C	0	0	0	0	0	0	0	0	1	0	0	1	0	0	1	0	0	0	0	0	0	0	0	1	0	0	0	0	0	0	0	0	0	0	0	0	0	0	0	0	0	0	0	0	1	0	0	0	0
YBL076C	0	0	0	0	0	0	0	0	0	0	0	1	0	0	1	0	0	0	0	0	0	0	1	0	1	0	0	0	0	1	0	1	0	0	0	1	0	0	0	0	0	0	0	0	0	0	0	0	0
YBL078C	1	0	0	0	0	0	0	0	0	0	0	0	0	0	1	0	0	0	0	0	1	0	0	1	1	0	0	0	0	0	0	0	0	0	0	0	0	0	0	0	0	0	0	0	0	0	0	1	0
YBL079W	1	0	1	0	0	0	0	0	1	0	0	0	0	0	1	0	0	0	0	0	0	0	1	0	1	0	1	0	0	0	0	1	0	0	0	0	0	0	0	0	0	0	0	0	0	0	0	0	0
YBL080C	1	0	0	0	0	0	0	0	1	0	0	0	0	0	1	0	0	0	0	0	0	0	0	0	0	0	0	0	0	0	0	0	0	0	0	1	0	0	0	0	0	0	0	0	0	0	0	0	0
YBL081W	1	0	1	0	0	0	0	0	1	0	0	0	0	0	1	0	0	0	0	0	0	0	0	0	1	0	0	0	0	0	0	0	0	0	0	0	0	0	0	0	0	0	0	0	0	0	0	1	0
YBL082C	0	0	0	0	0	0	0	0	0	0	0	0	0	0	1	0	0	0	0	0	0	0	0	0	0	0	0	0	0	0	0	1	0	0	0	0	0	0	0	0	1	0	0	0	0	0	0	0	0
YBL083C	0	0	0	0	0	0	0	0	0	0	0	0	0	0	0	0	0	0	0	0	0	0	0	0	0	0	1	0	0	0	0	1	0	0	0	0	0	0	0	0	0	0	0	0	0	0	0	0	0
YBL084C	1	0	0	0	0	0	0	0	1	0	0	0	0	0	1	0	0	0	0	0	0	0	0	0	1	0	0	0	0	0	0	0	0	0	0	1	0	0	0	0	0	0	0	0	0	0	0	0	0
YBL085W	1	0	1	0	0	0	0	0	1	0	0	0	0	0	0	0	0	0	0	0	0	0	0	1	0	0	0	0	0	0	0	0	0	1	0	1	0	0	0	0	0	0	0	0	0	0	0	0	0
YBL086C	1	0	0	0	0	0	0	0	0	0	0	0	0	0	0	0	0	0	0	0	0	0	0	0	1	0	0	0	0	0	0	0	0	0	0	0	0	0	0	0	0	0	0	0	0	0	0	0	0
YBL087C	0	0	0	0	0	0	0	0	0	0	1	1	0	0	1	0	0	0	0	1	1	0	1	1	1	1	0	0	0	0	0	0	0	0	0	0	0	1	1	0	0	0	0	0	0	0	0	0	0
YBL088C	1	0	0	0	0	0	0	0	0	0	0	0	0	0	0	0	0	0	0	0	0	0	0	0	0	0	0	0	0	0	0	0	0	0	0	1	0	0	0	0	0	0	0	0	0	0	0	1	0
YBL089W	1	0	0	0	0	0	0	0	0	0	0	0	0	0	0	0	0	0	0	0	0	0	1	0	0	0	0	0	0	0	0	1	0	0	0	0	0	0	0	0	1	0	0	0	0	0	0	1	0
YBL090W	1	0	0	0	0	0	0	0	0	0	0	0	0	0	1	0	0	1	0	0	1	0	0	1	0	1	0	0	0	0	0	0	0	0	0	1	0	0	0	0	0	0	0	0	0	0	0	1	0
YBL091C	0	0	0	0	0	0	0	0	0	0	1	0	0	0	1	0	0	0	0	0	0	0	0	0	1	0	0	0	0	0	0	0	0	0	0	0	0	0	0	0	0	0	0	0	0	0	0	0	0
YBL091C-A	0	0	0	0	0	0	0	0	0	0	0	0	0	0	0	0	0	0	0	1	1	0	0	1	0	0	0	0	0	0	0	0	0	0	0	0	0	0	0	0	0	0	0	0	0	0	0	0	0
YBL092W	0	0	0	0	0	0	0	0	0	0	0	0	0	0	0	0	0	0	0	0	1	0	0	1	0	0	0	0	0	1	0	0	0	0	0	0	0	0	0	0	0	0	0	0	0	0	0	0	0
YBL093C	0	0	0	0	0	0	0	0	0	0	0	0	0	0	1	0	0	1	0	0	1	0	0	1	0	0	0	0	0	0	0	0	0	0	0	1	0	0	0	0	0	0	0	0	0	0	0	0	0
YBL095W	0	0	0	0	0	0	0	0	0	0	1	0	0	0	0	0	0	0	0	0	1	0	0	1	0	0	0	0	0	0	0	0	0	0	0	0	0	0	0	0	0	0	0	0	1	0	0	0	0
YBL097W	1	0	1	0	0	0	0	0	1	0	0	0	0	0	1	0	0	0	0	0	0	0	0	0	0	0	0	0	0	0	0	0	0	0	0	1	0	0	0	0	0	0	0	0	0	0	0	0	0
YBL098W	0	0	0	0	0	0	0	0	0	0	1	0	0	0	0	0	0	0	0	0	1	0	0	0	0	0	0	0	0	0	0	0	0	0	0	0	0	0	0	0	0	0	0	0	0	0	0	0	0
YBL099W	0	0	0	0	0	0	0	0	0	0	0	1	0	0	1	0	0	0	0	0	0	0	0	0	1	0	0	0	0	1	0	1	0	0	0	1	0	0	0	0	0	0	0	0	0	0	0	0	0
YBL101C	1	0	1	0	0	0	0	0	1	0	0	0	0	0	0	0	0	0	0	0	0	0	0	0	0	0	0	0	0	0	0	0	0	0	0	0	0	0	0	0	0	0	0	0	0	0	0	0	0
YBL101W-A	0	0	0	0	0	0	0	0	0	0	0	0	0	0	0	0	0	1	0	0	0	0	0	1	0	0	1	0	0	0	0	1	0	0	0	0	0	0	0	0	1	0	0	0	0	0	0	1	0
YBL102W	1	0	0	0	0	0	0	0	0	0	0	0	0	0	1	0	0	0	0	0	1	0	0	0	0	0	0	0	0	0	0	0	0	0	0	0	0	0	0	0	0	0	0	1	0	0	0	1	0
YBL103C	1	0	1	0	0	0	0	0	1	0	0	0	0	0	1	0	0	0	0	0	0	0	0	0	1	0	0	0	0	0	0	0	0	0	0	0	0	0	0	0	0	0	0	0	1	0	0	0	0
YBL104C	1	0	0	0	0	0	0	0	1	0	0	0	0	0	0	0	0	0	0	0	0	0	1	1	0	0	0	0	0	0	0	0	0	0	0	0	0	0	0	0	0	0	0	0	0	0	0	0	0
YBL105C	1	0	0	0	0	0	0	0	1	0	0	0	0	0	1	0	0	0	0	0	0	0	0	1	0	0	0	0	0	0	0	0	0	0	0	1	0	0	0	0	1	0	0	0	0	0	0	0	0
YBL106C	1	0	0	0	0	0	0	0	0	0	0	0	0	0	1	0	0	0	0	0	0	0	0	1	0	0	0	0	0	0	0	0	0	0	1	0	0	0	0	0	0	0	0	0	0	0	0	1	0
YBL107C	0	0	0	0	0	0	0	0	0	0	0	0	0	0	0	0	0	0	0	1	1	0	0	1	0	0	0	0	0	0	0	0	0	0	0	1	0	0	0	0	0	0	0	0	0	0	0	0	0
YBL108C-A	0	0	0	0	0	0	0	0	0	0	0	0	0	0	0	0	0	0	0	0	1	0	0	0	0	0	0	0	0	0	0	0	0	0	0	0	0	0	0	0	0	0	0	0	0	0	0	1	0
YBL110C	0	0	1	0	0	0	0	0	0	0	0	0	0	0	0	0	0	0	0	0	0	0	0	0	0	0	0	0	0	0	0	0	0	0	0	0	0	0	0	0	0	0	0	0	0	0	0	0	0
YBL111C	0	0	1	0	0	0	0	0	1	0	0	0	0	0	0	0	0	0	0	0	0	0	0	0	1	0	0	0	0	0	0	0	0	0	0	0	0	0	0	0	1	0	0	0	0	0	0	0	0
YBL112C	0	0	1	0	0	0	0	0	1	0	0	0	0	0	0	0	0	0	0	0	0	0	0	0	1	0	0	0	0	0	0	0	0	0	0	0	0	0	0	0	1	0	0	0	0	0	0	0	0
YBL113C	0	0	1	0	0	0	0	0	1	0	0	0	0	0	0	0	0	0	0	0	0	0	0	0	1	0	0	0	0	0	0	0	0	0	0	0	0	0	0	0	1	0	0	0	0	0	0	0	0
YBLWTY2-1A	0	0	1	0	0	0	0	0	0	0	0	0	0	0	0	0	0	0	0	0	0	0	0	0	0	0	0	0	0	0	0	0	0	0	0	0	0	0	0	0	0	0	0	0	0	0	0	0	0
YBLWTY2-1B	0	0	1	0	0	0	0	0	0	0	0	0	0	0	0	0	0	0	0	0	0	0	0	0	0	0	0	0	0	0	0	0	0	0	0	0	0	0	0	0	0	0	0	0	0	0	0	0	0
YBR001C	1	0	0	0	0	0	0	0	1	0	0	0	0	0	1	0	0	0	0	0	0	0	0	0	0	0	0	0	0	0	0	1	0	0	0	1	0	0	0	1	0	0	0	0	0	0	0	0	0
YBR002C	1	0	0	0	0	0	0	0	0	0	1	0	0	0	1	0	0	0	0	0	1	0	0	0	0	1	0	0	0	0	0	0	0	0	0	0	0	0	0	0	0	0	0	0	0	0	0	0	0
YBR003W	1	0	0	0	0	0	0	0	1	0	0	0	0	0	0	0	0	0	0	0	0	0	0	1	0	0	0	0	0	0	0	0	0	0	0	1	0	0	0	0	0	0	0	0	0	0	0	0	0
YBR004C	1	0	1	0	0	0	0	0	0	0	0	0	0	0	1	0	0	0	0	0	0	0	0	1	0	0	0	0	0	0	0	1	0	0	0	0	0	0	0	0	0	0	0	0	0	0	0	1	0
YBR005W	1	0	0	0	0	0	0	0	0	0	0	0	0	0	1	0	0	1	0	0	1	0	0	1	0	1	0	0	0	0	0	0	0	0	0	0	0	0	0	0	0	0	0	0	0	0	0	1	0
YBR006W	0	0	0	0	0	0	0	0	1	0	0	0	0	0	0	0	0	0	0	0	1	0	0	1	0	0	0	0	0	0	0	0	0	0	0	0	0	0	0	0	0	0	0	0	0	0	0	0	0
YBR007C	1	0	1	0	0	0	0	0	0	0	0	0	0	0	0	0	0	0	0	0	0	0	0	1	0	0	0	0	0	0	0	0	0	0	0	0	0	0	0	0	0	0	0	0	0	0	0	0	0
YBR008C	1	0	0	0	0	0	0	0	1	0	0	0	0	0	1	0	0	0	0	0	0	0	0	0	0	0	1	0	0	0	0	0	0	0	0	0	0	0	0	0	0	0	0	0	1	0	0	1	0
YBR009C	1	0	0	0	0	0	0	0	0	0	1	0	0	0	1	1	0	0	0	1	1	0	1	1	1	1	0	1	0	0	0	0	0	0	0	1	0	0	0	0	0	0	0	0	0	0	0	1	0
YBR010W	1	0	0	0	0	0	0	0	0	0	1	1	0	0	1	0	0	0	0	1	1	0	1	1	1	1	0	1	0	0	0	0	1	0	0	1	0	0	1	0	0	0	0	0	0	0	0	0	0
YBR011C	0	0	0	0	0	0	0	0	0	0	1	0	0	0	1	0	0	0	0	0	0	0	1	1	1	0	0	0	0	1	0	1	0	0	0	1	0	0	0	0	0	0	0	0	0	0	0	0	0
YBR012C	0	0	0	0	0	0	0	0	0	0	0	0	0	0	0	0	0	0	0	0	1	0	0	0	0	0	0	0	0	0	0	0	0	0	0	0	0	0	0	0	0	0	0	0	0	0	0	0	0
YBR012W-A	0	0	1	0	0	0	0	0	0	0	0	0	0	0	0	0	0	0	0	0	0	0	0	0	0	0	0	0	0	0	0	0	0	0	0	1	0	0	0	0	0	0	0	0	0	0	0	0	0
YBR013C	1	0	0	0	0	0	0	0	0	0	0	0	0	0	1	0	0	0	0	1	1	0	0	0	1	0	0	0	0	0	0	0	0	0	0	0	0	0	0	0	0	0	0	0	0	0	0	1	0
YBR014C	1	0	0	0	0	0	0	0	0	0	1	0	0	0	1	0	0	0	0	1	1	0	0	1	0	0	0	0	0	0	0	0	0	0	0	0	0	0	0	0	0	0	0	0	0	0	0	0	0
YBR015C	0	0	0	0	0	0	0	0	0	0	0	0	0	0	1	0	0	0	0	0	0	0	0	0	0	0	1	0	0	0	0	1	0	0	0	0	0	0	0	0	0	0	0	0	0	0	0	1	0
YBR016W	0	0	1	0	0	0	0	0	0	0	0	0	0	0	1	0	0	1	0	1	1	0	0	1	1	0	0	0	0	0	0	0	0	0	0	0	0	0	0	0	0	0	0	0	0	0	0	1	0
YBR017C	0	0	0	0	0	0	0	0	0	0	0	0	0	0	1	0	0	0	0	0	0	0	1	0	0	0	0	0	0	0	0	1	0	0	0	1	0	0	0	0	0	0	0	0	0	0	0	0	0
YBR019C	0	0	1	0	0	0	0	0	0	0	0	0	0	0	0	0	0	0	0	0	0	0	0	0	0	0	0	0	0	0	0	0	0	0	0	0	0	0	0	0	0	0	0	0	0	0	0	0	0
YBR020W	1	0	0	0	0	0	0	0	1	1	0	0	0	0	0	0	0	0	0	0	0	0	0	0	0	0	0	0	0	0	0	0	0	0	0	0	0	0	0	0	0	0	0	0	0	0	1	0	0
YBR021W	1	0	0	0	0	0	0	0	1	0	0	0	0	0	0	0	0	0	0	0	0	0	0	0	0	0	0	0	0	0	0	1	0	0	0	0	0	0	0	0	0	0	0	0	0	0	0	1	0
YBR022W	1	0	0	0	0	0	0	0	0	0	1	0	0	0	0	0	0	0	0	0	1	0	0	1	1	0	0	0	0	0	0	0	0	0	0	1	0	0	0	0	0	0	0	0	0	0	0	0	0
YBR023C	0	0	0	0	0	0	0	0	1	0	0	0	0	0	0	0	0	0	0	0	0	0	0	0	0	0	0	0	0	0	0	1	0	0	0	0	0	0	0	0	0	0	0	0	0	0	0	0	0
YBR024W	1	0	0	0	0	0	0	0	0	0	0	0	0	0	0	0	0	0	0	0	0	0	0	0	0	0	0	0	0	0	0	0	0	0	0	1	0	0	0	0	0	0	0	0	0	0	0	0	0
YBR025C	0	0	0	0	0	0	0	0	0	0	0	0	0	0	1	0	0	0	0	0	0	0	0	1	1	0	0	0	0	1	0	1	1	0	0	1	0	0	0	0	0	0	0	0	0	0	0	0	0
YBR026C	0	0	0	0	0	0	0	0	0	0	1	0	0	0	0	0	0	0	0	0	1	0	0	0	0	0	0	0	0	0	0	1	0	0	0	0	0	0	0	0	0	0	0	0	0	0	0	0	0
YBR027C	0	0	0	0	0	0	0	0	0	0	0	0	0	0	0	0	0	0	0	0	0	0	0	0	0	0	0	0	0	0	0	0	0	0	0	0	0	0	0	0	0	0	0	0	0	0	0	1	0
YBR028C	1	0	0	0	0	0	0	0	1	0	0	0	0	0	0	0	0	0	0	0	0	0	0	1	1	0	0	0	0	0	0	0	0	0	0	0	0	0	0	0	0	0	0	0	0	0	0	1	0
YBR029C	0	0	1	0	0	0	0	0	0	0	0	0	0	0	1	0	0	0	0	0	0	0	0	0	0	0	0	0	0	0	0	1	0	0	0	1	0	0	0	0	0	0	0	0	0	0	0	1	0
YBR030W	1	0	0	0	0	0	0	0	0	0	0	0	0	0	1	0	0	0	0	0	1	0	0	1	0	0	0	0	0	0	0	0	0	0	0	0	0	0	0	0	0	0	0	0	0	0	0	0	0
YBR031W	0	0	0	0	0	0	0	0	0	0	0	0	0	0	1	0	0	0	0	0	1	0	0	0	0	0	0	0	0	0	0	0	0	0	0	0	0	0	0	0	0	0	0	0	0	0	0	0	0
YBR033W	0	0	1	0	0	0	0	0	1	0	0	0	0	0	0	0	0	0	0	0	0	0	0	1	0	0	0	0	0	0	0	0	0	0	0	0	0	0	0	0	0	0	0	0	0	0	0	0	0
YBR034C	1	0	0	0	0	0	0	0	0	0	0	0	0	0	1	0	0	1	0	0	0	0	1	0	1	0	0	0	0	0	0	0	0	0	0	1	0	0	0	0	0	0	0	0	0	0	0	0	0
YBR035C	0	0	0	0	0	0	0	0	0	0	1	0	0	0	1	0	0	0	0	0	1	0	1	1	0	0	0	0	0	1	0	0	0	0	0	0	0	0	0	0	0	0	0	0	0	0	0	0	0
YBR036C	0	0	0	0	0	0	0	0	0	0	0	0	0	0	1	0	0	0	0	0	0	0	0	1	0	0	0	0	0	0	0	1	0	0	0	0	0	0	0	0	0	0	0	0	0	0	0	1	0
YBR037C	1	0	0	0	0	0	0	0	0	0	0	0	0	0	1	0	0	0	0	0	1	0	0	1	0	1	0	0	0	0	0	0	0	0	0	1	0	0	0	0	0	0	0	0	0	0	0	0	0
YBR038W	0	0	0	0	0	0	0	0	0	0	0	0	0	0	1	0	0	0	0	0	0	0	0	1	0	0	0	0	0	1	0	1	0	0	0	0	0	0	0	0	0	0	0	0	0	0	0	1	0
YBR039W	0	0	0	0	0	0	0	0	0	0	0	0	0	0	1	0	0	1	0	0	0	0	0	1	0	0	0	0	0	0	0	1	0	0	0	1	0	0	0	0	0	0	0	0	0	0	0	0	0
YBR040W	0	0	0	0	0	0	0	0	0	0	0	0	0	0	1	0	0	0	0	0	0	0	0	0	0	0	0	0	0	0	0	1	0	0	0	0	0	0	0	0	0	0	0	0	0	0	0	0	0
YBR041W	0	0	0	0	0	0	0	0	0	0	0	0	0	0	0	0	0	0	0	0	0	0	0	0	0	0	0	0	0	0	0	1	0	0	0	0	0	0	0	0	0	0	0	0	0	0	0	0	0
YBR042C	0	0	0	0	0	0	0	0	0	0	0	0	0	0	0	0	0	0	0	0	1	0	0	1	0	0	0	0	0	0	0	0	0	0	0	0	0	0	0	0	0	0	0	0	0	0	0	1	0
YBR043C	1	0	1	0	0	0	0	0	1	0	0	0	0	0	0	1	0	0	0	0	1	0	0	0	0	0	0	0	0	0	0	0	0	0	0	0	0	0	0	0	0	0	0	0	1	0	0	0	0
YBR044C	1	0	0	0	0	0	0	0	1	0	0	0	0	0	1	0	0	0	0	0	0	0	0	0	1	0	0	0	0	0	0	0	0	0	0	1	0	0	0	0	1	0	0	0	0	0	0	0	0
YBR045C	0	0	0	0	0	0	0	0	0	0	0	0	0	0	0	0	0	0	0	0	0	0	0	1	0	0	0	0	0	0	0	0	0	0	0	0	0	0	0	0	0	0	0	0	0	0	0	0	0
YBR046C	1	0	0	0	0	0	0	0	0	0	1	0	0	0	0	0	0	0	0	1	0	0	0	1	0	0	0	0	0	0	0	0	0	0	0	0	0	0	0	1	0	0	0	0	0	0	0	1	0
YBR047W	1	0	0	0	0	0	0	0	0	0	0	0	0	0	0	0	0	0	0	1	0	0	0	1	0	0	0	0	0	0	0	0	0	0	0	0	0	0	0	0	0	0	0	0	0	0	0	0	0
YBR048W	0	0	1	0	0	0	0	0	0	0	1	1	0	0	1	0	0	1	0	1	1	0	0	1	0	1	0	0	0	1	0	0	1	0	1	1	0	0	1	0	0	0	0	0	0	0	0	0	0
YBR049C	1	0	0	0	0	0	0	0	1	0	0	0	0	0	1	0	0	0	0	0	0	0	0	0	1	0	0	0	0	1	0	0	0	0	0	0	0	0	0	0	0	0	0	0	0	0	0	0	0
YBR050C	0	0	0	0	0	0	0	0	0	0	0	0	0	0	0	0	0	0	0	0	0	0	0	1	0	0	0	0	0	0	0	0	0	0	0	0	0	0	0	0	0	0	0	0	0	0	0	0	0
YBR052C	1	0	0	0	0	0	0	0	0	0	0	0	0	0	1	0	0	1	0	0	1	0	0	1	1	0	0	0	0	1	0	0	0	0	0	1	0	0	0	0	0	0	0	0	0	0	0	0	0
YBR053C	0	0	0	0	0	0	0	0	0	0	0	0	0	0	0	0	0	0	0	0	0	0	0	0	0	0	0	0	0	0	0	1	0	0	0	0	0	0	0	0	0	0	0	0	0	0	0	0	0
YBR054W	1	0	0	0	0	0	0	0	0	0	0	0	0	0	1	0	0	0	0	0	0	0	0	1	0	0	0	0	0	0	0	0	0	0	0	0	0	0	0	0	0	0	0	0	0	0	0	1	0
YBR055C	1	0	0	0	1	0	0	0	1	0	0	0	0	0	1	0	0	0	0	0	1	0	0	1	0	0	0	0	0	1	0	0	0	0	0	1	0	0	0	0	0	0	0	0	0	0	0	0	0
YBR056W	0	0	0	0	0	0	0	0	0	0	0	1	0	0	1	0	0	0	0	0	0	0	0	1	0	0	0	0	0	0	0	1	0	0	0	1	0	0	0	0	0	0	0	0	0	0	0	0	0
YBR056W-A	0	0	0	0	0	0	0	0	0	0	0	0	0	0	0	0	0	0	0	0	1	0	0	0	0	0	0	0	0	0	0	0	0	0	0	0	0	0	0	1	0	0	0	1	0	0	0	1	0
YBR057C	1	0	0	0	0	0	0	0	0	0	0	0	0	0	1	0	0	0	0	0	0	0	0	1	1	0	0	0	0	1	0	0	0	0	0	0	0	0	0	0	0	0	0	0	0	0	0	0	0
YBR058C	1	0	0	0	0	0	0	0	1	0	0	0	0	0	0	0	0	0	0	0	0	0	0	0	0	0	0	0	0	0	0	1	0	0	0	0	0	0	0	0	0	0	0	0	0	0	0	0	0
YBR058C-A	0	0	0	0	0	0	0	0	0	0	0	0	0	0	0	0	0	0	0	0	0	0	0	1	0	0	0	0	0	0	0	0	0	0	0	0	0	0	0	0	0	0	0	0	0	0	0	0	0
YBR059C	1	0	0	0	0	0	0	0	1	0	0	0	0	0	1	0	0	0	0	0	0	0	0	1	0	0	0	0	0	0	0	1	0	0	0	0	0	0	0	0	1	0	0	0	0	0	0	0	0
YBR060C	0	0	0	0	0	0	0	0	0	0	0	0	0	0	0	0	0	0	0	0	0	0	0	1	1	0	0	0	0	0	0	0	0	0	0	0	0	0	0	0	0	0	0	0	0	0	0	0	0
YBR061C	0	0	0	0	0	0	0	0	0	0	0	0	0	0	1	0	0	0	0	0	1	0	1	0	1	0	0	0	0	0	0	0	0	0	0	0	0	0	0	0	0	0	0	0	0	0	0	0	0
YBR062C	0	0	0	0	0	0	0	0	0	0	0	0	0	0	0	0	0	0	0	0	1	0	0	1	0	0	0	0	0	0	0	0	0	0	0	0	0	0	0	0	0	0	0	0	0	0	0	0	0
YBR063C	0	0	0	0	0	0	0	0	1	0	0	0	0	0	0	0	0	0	0	0	0	0	0	1	0	0	0	0	0	0	0	0	0	0	0	0	0	0	0	0	0	0	0	0	1	0	0	0	0
YBR065C	1	0	0	0	0	0	0	0	1	0	0	0	0	0	1	0	0	0	0	0	0	0	0	1	0	0	1	0	0	0	0	0	0	0	0	0	0	0	0	0	0	0	0	0	0	0	0	0	0
YBR066C	1	0	0	0	0	0	0	0	0	0	0	0	0	0	1	0	0	1	0	0	1	0	0	1	0	0	0	0	0	0	0	0	0	0	0	1	0	0	0	0	0	0	0	0	0	0	0	0	0
YBR067C	1	0	0	0	0	0	0	0	0	0	0	0	0	0	1	0	0	0	0	0	0	0	1	0	1	0	0	0	0	0	0	1	0	0	0	1	0	0	1	0	0	0	0	0	0	0	0	1	0
YBR068C	1	0	0	0	0	0	0	0	1	0	0	1	0	0	1	1	0	0	0	0	0	0	0	1	1	0	0	0	0	1	0	1	0	0	0	0	0	0	0	0	0	0	0	0	0	0	0	1	0
YBR069C	1	0	0	0	0	0	0	0	1	0	0	0	0	0	1	0	0	0	0	0	1	0	0	1	0	0	0	0	0	1	0	1	0	0	0	1	0	0	0	0	0	0	0	0	0	0	0	1	0
YBR070C	1	0	0	0	0	0	0	0	0	0	1	0	0	0	1	0	0	1	0	1	1	0	0	1	1	1	0	0	0	0	0	0	0	0	0	0	0	0	0	0	0	0	0	0	0	0	0	1	0
YBR071W	1	0	1	0	0	0	0	0	0	0	0	0	0	0	1	0	0	1	0	0	1	0	0	0	1	1	0	0	0	0	0	0	0	0	0	0	0	0	0	0	0	0	0	0	0	0	0	1	0
YBR072W	1	0	0	0	0	0	0	0	0	0	0	0	0	0	1	0	0	0	0	1	1	0	0	1	0	0	0	0	0	0	0	0	0	0	0	0	0	0	0	0	0	0	0	0	0	0	0	0	0
YBR073W	1	0	0	0	0	0	0	0	1	0	0	0	0	0	1	0	0	0	0	0	0	0	0	1	1	0	0	0	0	0	0	1	0	0	0	0	0	0	0	0	0	0	0	0	0	0	0	0	0
YBR074W	0	0	0	0	0	0	0	0	1	0	0	0	0	0	0	0	0	0	0	0	0	0	0	0	0	0	0	0	0	0	0	1	0	0	0	0	0	0	0	0	0	0	0	0	0	0	0	1	0
YBR076C-A	0	0	0	0	0	0	0	0	0	0	0	0	0	0	0	1	0	0	0	0	0	0	0	0	0	0	0	0	0	0	0	0	0	0	0	0	0	0	0	0	0	0	0	0	0	0	0	0	0
YBR077C	1	0	0	0	0	0	0	0	0	0	1	0	0	0	1	0	0	0	0	0	1	0	0	1	0	0	0	0	0	0	0	0	0	0	0	0	0	0	0	1	0	0	0	0	1	0	0	1	0
YBR078W	0	0	1	0	0	0	0	0	0	0	0	1	0	0	1	1	0	0	0	0	0	0	0	0	1	0	0	0	0	1	0	1	0	0	0	1	0	0	0	0	0	0	0	0	0	0	0	1	0
YBR079C	0	0	0	0	0	0	0	0	0	0	0	0	0	0	1	0	0	0	0	0	1	0	1	1	1	0	0	0	0	1	0	1	0	0	0	1	0	0	0	0	1	0	0	0	0	0	1	0	0
YBR080C	0	0	0	0	0	0	0	0	0	0	0	0	0	0	0	0	0	0	0	0	0	0	0	1	1	0	0	0	0	1	0	1	0	0	0	0	0	0	0	0	0	0	0	0	0	0	0	0	0
YBR081C	1	0	1	0	0	0	0	0	1	0	0	0	0	0	1	0	0	0	0	0	0	0	1	0	1	0	0	0	0	0	0	0	0	0	0	1	0	0	0	0	0	0	0	0	0	0	0	0	0
YBR082C	0	0	1	0	0	0	0	0	0	0	1	0	0	0	1	0	0	0	0	0	1	0	0	1	0	0	0	0	0	1	0	0	0	0	0	1	0	0	0	0	0	0	0	0	0	0	0	0	0
YBR083W	1	0	1	0	0	0	0	0	1	0	0	0	0	0	1	0	0	1	0	0	0	0	0	1	0	0	0	0	0	0	0	1	0	0	0	1	0	0	0	0	0	0	0	0	0	0	0	0	0
YBR084C-A	0	0	0	0	0	0	0	0	0	0	1	0	0	0	1	0	0	1	0	1	1	0	0	1	1	1	0	0	0	1	0	0	0	0	0	1	0	0	0	0	0	0	0	0	0	0	0	0	0
YBR084W	0	0	0	0	0	0	0	0	0	0	0	1	0	0	1	0	0	0	0	0	1	0	0	0	1	0	0	0	0	1	0	1	0	0	0	0	0	0	0	0	0	0	0	0	0	0	0	0	0
YBR085C-A	0	0	0	0	0	0	0	0	0	0	0	0	0	0	1	1	0	0	0	0	0	0	0	1	0	0	0	0	0	0	0	0	0	0	0	1	0	0	0	0	0	0	0	0	1	0	0	0	0
YBR085W	1	0	0	0	0	0	0	0	0	0	0	0	0	0	1	0	0	0	0	0	0	0	0	1	1	0	0	0	0	0	0	0	0	0	0	0	0	0	0	0	0	0	0	0	0	0	0	0	0
YBR086C	0	0	1	0	0	0	0	0	1	0	0	1	0	0	1	0	0	0	0	0	0	0	0	0	1	0	0	0	0	1	0	1	0	0	1	0	1	0	0	0	1	0	0	0	0	0	0	1	0
YBR087W	0	0	0	0	0	0	0	0	0	0	1	0	0	0	1	0	0	0	0	0	1	0	0	0	0	0	0	0	0	0	0	1	0	0	0	0	0	0	0	0	0	0	0	0	0	0	0	0	0
YBR088C	0	0	0	0	0	0	0	0	0	0	1	0	0	0	1	0	0	0	0	0	1	0	1	1	0	0	0	0	0	0	0	0	0	0	0	0	0	0	0	0	0	0	0	0	0	0	0	0	0
YBR089C-A	0	0	0	0	0	0	0	0	0	0	0	0	0	0	1	0	0	1	0	1	1	0	0	1	1	0	0	0	0	0	0	0	0	0	0	0	0	0	0	0	0	0	0	0	0	0	0	1	0
YBR089W	0	0	0	0	0	0	0	0	0	0	0	0	0	0	0	0	0	0	0	0	0	0	1	0	0	0	0	0	0	0	0	0	0	0	0	0	0	0	0	0	0	0	0	0	0	0	0	0	0
YBR090C	1	0	0	0	0	0	0	0	0	0	1	0	0	0	1	0	0	1	0	1	1	0	0	1	1	1	0	0	0	0	0	1	0	0	0	0	0	0	0	0	0	0	0	0	0	0	0	1	0
YBR091C	0	0	0	0	0	0	0	0	0	0	1	0	0	0	1	0	0	1	0	0	1	0	0	1	0	1	0	0	0	0	0	0	0	0	0	1	0	0	0	0	0	0	0	0	0	0	0	0	0
YBR092C	0	0	0	0	0	0	0	0	0	0	0	0	0	0	1	0	0	0	0	0	0	0	0	0	1	0	0	0	0	1	0	1	0	0	0	0	1	0	0	0	0	0	0	0	0	0	0	0	0
YBR093C	0	0	0	0	0	0	0	0	0	0	0	0	0	0	1	0	0	0	0	0	1	0	0	0	0	0	1	0	0	0	0	1	0	0	0	0	1	0	0	0	0	0	0	0	0	0	0	1	0
YBR094W	1	0	0	0	0	0	0	0	1	0	0	0	0	0	0	0	0	0	0	0	0	0	0	0	0	0	0	0	0	0	0	1	0	0	0	1	0	0	0	0	0	0	0	0	0	0	0	0	0
YBR095C	1	0	0	0	0	0	0	0	0	0	0	0	0	0	0	0	0	0	0	0	0	0	0	1	1	0	0	0	0	0	0	0	0	0	0	0	0	0	0	0	0	0	0	0	0	0	0	0	0
YBR096W	0	0	0	0	0	0	0	0	0	0	1	0	0	0	0	0	0	0	0	0	1	0	0	0	0	0	0	0	0	0	0	0	0	0	0	1	0	0	0	0	0	0	0	0	0	0	0	1	0
YBR097W	1	0	0	0	0	0	0	0	1	0	0	0	0	0	1	0	0	0	0	0	0	0	0	0	0	0	0	0	0	0	0	0	0	0	0	0	0	0	0	0	0	0	0	0	0	0	0	0	0
YBR098W	0	0	0	0	0	0	0	0	1	0	0	0	0	0	0	0	0	0	0	0	0	0	0	1	0	0	0	0	0	0	0	0	0	0	0	1	0	0	0	0	1	0	0	0	0	0	0	0	0
YBR100W	0	0	0	0	0	0	0	0	0	0	0	0	0	0	0	0	0	0	0	0	0	0	0	0	0	0	0	0	0	0	1	0	0	0	0	0	0	0	0	0	0	0	0	0	0	0	0	0	0
YBR101C	0	0	0	0	0	0	0	0	0	0	0	0	0	0	1	0	0	1	0	0	1	0	0	1	0	0	0	0	0	0	0	0	0	0	0	0	0	0	0	0	0	0	0	0	0	0	0	0	0
YBR102C	1	0	0	0	0	0	0	0	1	0	0	0	0	0	0	0	0	0	0	0	0	0	0	0	0	0	0	0	0	0	0	0	0	0	1	0	0	0	0	0	0	0	0	0	0	0	0	0	0
YBR103C-A	0	0	0	0	0	0	0	0	0	0	0	0	0	0	0	0	0	0	0	0	1	0	0	0	0	0	0	0	0	0	0	0	0	0	0	0	0	0	0	0	0	0	0	0	0	0	0	0	0
YBR103W	1	0	0	0	0	0	0	0	1	0	0	0	0	0	1	0	0	0	0	0	0	0	0	1	0	0	0	0	0	0	0	0	0	0	0	1	0	0	0	0	0	0	0	0	0	0	0	0	0
YBR104W	0	0	0	0	0	0	0	0	0	0	0	0	0	0	1	0	0	0	0	0	0	0	0	0	1	1	0	0	0	0	0	0	0	0	0	0	0	0	0	0	0	0	0	0	0	0	0	0	0
YBR105C	1	0	1	0	0	0	0	0	1	0	0	0	0	0	1	0	0	0	0	0	0	0	0	0	1	0	1	0	0	1	0	0	0	0	0	0	0	0	0	0	0	0	0	0	0	0	0	1	0
YBR106W	0	0	0	0	0	0	0	0	0	0	1	0	0	0	1	0	0	1	0	1	1	0	1	1	1	1	0	0	0	0	0	0	0	0	0	1	0	0	0	0	0	0	0	0	0	0	0	1	0
YBR107C	1	0	1	0	0	0	0	0	0	0	0	0	0	0	0	0	0	1	0	1	0	0	0	0	0	0	0	0	0	0	0	0	0	0	0	0	0	0	0	0	0	0	0	0	0	0	0	0	0
YBR108W	0	0	1	0	0	0	0	0	1	0	0	0	0	0	0	0	0	0	0	0	0	0	0	0	0	0	0	0	0	0	0	0	0	0	0	0	0	0	0	0	0	0	0	0	0	0	0	0	0
YBR109C	0	0	0	0	0	0	0	0	0	0	1	0	0	0	1	0	0	0	0	1	1	0	0	1	1	0	0	0	0	0	0	0	0	0	0	0	0	0	1	0	0	0	0	0	0	0	0	0	0
YBR110W	0	0	0	0	0	0	0	0	0	0	0	0	0	0	0	0	0	0	0	0	0	0	0	0	0	0	0	0	0	0	0	0	0	0	0	0	0	0	0	0	0	0	0	0	0	0	0	1	0
YBR111C	1	0	0	0	0	0	0	0	0	0	0	0	0	0	1	0	0	0	0	0	1	0	1	1	0	1	0	0	0	1	0	0	0	0	0	0	0	0	0	0	0	0	0	0	0	0	0	0	0
YBR111W-A	0	0	0	0	0	0	0	0	0	0	0	0	0	0	1	0	0	1	0	1	1	0	0	1	0	0	0	0	0	0	0	0	0	0	0	0	0	0	0	0	0	0	0	0	0	0	0	1	0
YBR112C	1	0	1	0	0	0	0	0	1	0	0	0	0	0	0	0	0	0	0	0	0	0	1	1	1	0	0	0	0	0	0	1	0	1	0	0	0	0	0	0	0	0	0	0	0	0	0	0	0
YBR113W	0	0	1	0	0	0	0	0	0	0	0	0	0	0	0	0	0	0	0	0	0	0	0	0	0	0	0	0	0	0	0	0	0	0	0	0	0	0	0	0	0	0	0	0	0	0	0	0	0
YBR114W	1	0	0	0	0	0	0	0	1	0	0	0	0	0	0	0	0	0	0	0	0	0	0	0	0	0	0	0	0	0	0	0	0	0	0	0	0	0	0	0	0	0	0	0	0	0	0	0	0
YBR115C	0	0	0	0	0	0	0	0	1	0	1	0	0	0	0	0	0	0	0	0	1	0	0	0	0	0	0	0	0	0	0	1	0	0	0	0	0	0	0	0	0	0	0	0	0	0	0	0	0
YBR117C	0	0	1	0	0	0	0	0	0	0	0	0	0	0	0	0	0	0	0	0	0	0	0	0	0	0	0	0	0	0	0	0	0	0	0	0	0	0	0	0	0	0	0	0	0	0	0	0	0
YBR118W	0	0	0	0	0	0	0	0	0	0	1	1	0	0	1	0	0	0	0	0	1	0	0	0	1	0	0	0	0	1	0	0	0	0	0	1	0	0	0	0	0	0	0	0	0	0	0	1	0
YBR119W	0	0	1	0	0	0	0	0	0	0	0	0	0	0	0	0	0	1	0	0	1	0	0	1	0	0	0	0	0	0	0	0	0	0	0	1	0	0	0	0	0	0	0	0	1	0	0	0	0
YBR120C	0	0	0	0	0	0	0	0	0	0	1	0	0	0	1	0	0	1	0	0	1	0	0	1	0	0	0	0	0	0	0	0	0	0	0	1	0	0	0	0	0	0	0	0	0	0	0	0	0
YBR121C	0	0	0	0	0	0	0	0	0	0	0	0	0	0	1	0	0	0	0	0	0	0	1	0	1	0	0	0	0	0	0	1	0	0	0	1	0	0	0	0	0	0	0	0	0	0	0	0	0
YBR122C	1	0	0	0	0	0	0	0	0	0	1	0	0	0	1	0	0	0	0	0	1	0	0	1	0	0	0	0	0	1	0	0	0	0	0	1	0	0	0	0	0	0	0	0	0	0	0	0	0
YBR123C	1	0	0	0	0	0	0	0	0	0	0	0	0	0	0	0	0	0	0	0	0	0	0	0	0	0	0	0	0	0	0	0	0	0	0	0	0	0	0	0	0	0	0	0	0	0	0	0	0
YBR125C	1	0	0	0	0	0	0	0	0	0	1	0	0	0	0	0	0	0	0	0	0	0	0	0	0	0	0	0	0	0	0	0	0	0	0	0	0	0	0	0	0	0	0	0	0	0	0	1	0
YBR126C	1	0	0	0	0	0	0	0	0	0	0	0	0	0	1	0	0	0	0	0	0	0	0	1	0	0	0	0	0	0	0	0	0	0	0	1	0	0	0	0	0	0	0	0	0	0	0	0	0
YBR126W-A	0	0	0	0	0	0	0	0	0	0	0	0	0	0	1	0	0	0	0	0	0	0	0	0	0	0	0	0	0	0	0	0	0	0	0	0	0	0	0	0	0	0	0	0	0	0	0	0	0
YBR127C	0	0	0	0	0	0	0	0	0	0	0	0	0	0	1	0	0	0	0	0	0	0	1	1	1	0	0	0	0	1	0	0	1	0	0	1	0	0	0	0	0	0	0	0	0	0	0	1	0
YBR128C	0	0	0	0	0	0	0	0	0	0	0	0	0	0	0	0	0	0	0	0	0	0	0	1	0	0	0	0	0	0	0	0	0	0	0	0	0	0	0	0	0	0	0	0	0	0	0	0	0
YBR129C	1	0	0	0	0	0	0	0	0	0	0	0	0	0	1	0	0	0	0	0	0	0	0	1	1	0	0	0	0	0	0	0	0	0	0	0	0	0	0	0	0	0	0	0	0	0	0	0	0
YBR130C	1	0	0	0	0	0	0	0	0	0	0	0	0	0	1	0	0	0	0	0	0	0	0	1	0	0	0	0	0	0	0	1	0	0	0	0	1	0	0	0	0	0	0	0	0	0	0	0	0
YBR131W	1	0	0	0	0	0	0	0	1	0	0	0	0	0	1	0	0	0	0	0	0	0	0	0	1	0	0	0	0	0	0	0	0	0	0	0	0	0	0	0	0	0	0	0	0	0	0	0	0
YBR132C	1	0	0	0	0	0	0	0	1	0	0	0	0	0	0	0	0	0	0	0	0	0	0	0	0	0	0	0	0	0	0	0	0	0	0	0	0	0	0	0	0	0	0	0	0	0	0	0	0
YBR133C	1	0	0	0	0	0	0	0	1	0	0	0	0	0	1	0	0	0	0	0	0	0	1	0	0	0	0	0	0	0	0	1	0	0	0	1	0	0	0	0	0	0	0	0	0	0	0	0	0
YBR135W	1	0	1	0	0	0	0	0	0	0	0	0	0	0	1	0	0	1	0	0	1	0	0	0	1	1	0	0	0	0	0	0	0	0	0	0	0	0	0	1	0	0	0	0	0	0	0	0	0
YBR136W	1	0	0	0	0	0	0	0	0	0	0	0	0	0	0	0	0	0	0	0	0	0	0	1	0	0	0	0	0	0	0	0	0	0	0	1	0	0	0	0	0	0	0	0	0	0	0	0	0
YBR137W	1	0	0	0	0	0	0	0	0	0	1	0	0	0	0	0	0	1	0	0	1	0	0	1	0	0	0	0	0	0	0	0	0	0	0	0	0	0	0	0	0	0	0	0	0	0	0	0	0
YBR138C	1	0	0	0	0	0	0	0	0	0	0	0	0	0	0	0	0	0	0	0	0	0	0	1	0	0	0	0	0	0	0	1	0	0	0	0	0	0	0	0	0	0	0	0	0	0	0	0	0
YBR139W	0	0	0	0	0	0	0	0	0	0	0	0	0	0	0	0	0	0	0	0	0	0	0	0	0	0	0	0	0	0	0	1	0	0	0	1	0	0	0	0	1	0	0	0	0	0	1	1	0
YBR140C	0	0	0	0	0	0	0	0	0	0	0	0	0	0	1	0	0	0	0	0	0	0	0	1	0	0	0	0	0	0	0	1	0	0	0	1	0	0	0	0	0	0	0	0	0	0	0	0	0
YBR141C	1	0	0	0	0	0	0	0	0	0	0	0	0	0	0	0	0	0	0	0	0	0	0	0	1	0	0	0	0	0	0	0	0	0	0	0	0	0	0	0	0	0	0	0	0	0	0	0	0
YBR142W	0	0	0	0	0	0	0	0	1	0	0	0	0	0	1	0	0	0	0	0	0	0	0	1	1	0	0	0	0	1	0	1	0	0	0	1	0	0	0	0	1	0	0	0	0	0	0	0	0
YBR143C	0	0	0	0	0	0	0	0	0	0	0	0	0	0	1	0	0	0	0	0	0	0	1	0	1	0	0	0	0	1	0	0	0	0	0	1	0	0	0	0	0	0	0	0	0	0	0	0	0
YBR145W	1	0	0	0	0	0	0	0	0	0	0	0	0	0	0	0	0	0	0	0	1	0	0	1	1	0	0	0	0	0	0	0	0	0	0	0	0	0	0	0	0	0	0	0	0	0	0	1	0
YBR146W	1	0	0	0	0	0	0	0	0	0	0	0	0	0	1	0	0	0	0	0	0	0	0	1	0	0	0	0	0	1	0	0	0	0	0	1	0	0	0	0	0	0	0	0	0	0	0	0	0
YBR147W	0	0	0	0	0	0	0	0	0	0	1	0	0	0	0	0	0	0	0	0	0	0	0	0	0	0	0	0	0	0	0	0	0	0	0	0	0	0	0	0	0	0	0	0	0	0	0	0	0
YBR148W	0	0	0	0	0	0	0	0	0	0	0	0	0	0	1	0	0	0	0	0	0	0	0	0	0	0	0	0	0	0	0	0	0	0	0	0	0	0	0	0	0	0	0	0	0	0	0	0	0
YBR149W	0	0	0	0	0	0	0	0	0	0	0	0	0	0	0	0	0	0	0	1	0	0	0	1	1	0	0	0	0	1	0	1	0	0	0	0	0	0	0	0	0	0	0	0	0	0	0	0	0
YBR150C	1	0	0	1	0	0	0	0	0	0	0	0	0	0	1	0	0	0	0	0	0	0	0	1	1	0	0	0	0	0	0	0	0	0	0	1	0	0	0	0	0	0	0	0	0	0	0	1	0
YBR151W	0	0	0	0	0	0	0	0	0	0	1	0	0	0	0	0	0	0	0	0	0	0	0	0	0	1	0	0	0	0	0	0	0	0	0	0	0	0	0	0	0	0	0	0	0	0	0	0	0
YBR152W	1	0	0	0	0	0	0	0	0	0	0	0	0	0	1	0	0	0	0	0	0	0	0	0	1	0	0	0	0	0	0	0	0	0	0	0	0	0	0	0	0	0	0	0	0	0	0	0	0
YBR153W	1	0	0	0	0	0	0	0	0	0	1	0	0	0	1	0	0	0	0	0	0	0	1	1	1	0	0	0	0	0	0	0	0	0	0	0	0	0	0	0	0	0	0	0	1	0	0	1	0
YBR154C	0	0	0	0	0	0	0	0	0	0	1	0	0	0	1	0	0	1	0	1	1	0	1	1	0	0	0	0	0	1	0	0	0	0	0	0	0	0	0	0	0	0	0	0	0	0	0	0	0
YBR155W	0	0	0	0	0	0	0	0	0	1	0	0	0	0	1	0	0	0	0	0	0	0	0	1	0	0	0	0	0	1	0	0	0	0	0	0	0	0	0	0	0	0	0	0	0	0	0	0	0
YBR156C	1	0	0	0	0	0	0	0	0	0	0	0	0	0	1	0	0	0	0	0	0	0	0	1	1	0	0	0	0	0	0	0	0	0	0	0	0	0	0	0	0	0	0	0	0	0	0	1	0
YBR157C	1	0	1	0	0	0	0	0	1	0	1	0	0	0	1	0	0	1	0	0	1	0	0	0	1	0	0	0	0	0	0	0	0	0	0	0	0	0	0	0	0	0	0	0	0	0	0	0	0
YBR158W	1	0	0	0	0	0	0	0	1	0	0	0	0	0	1	1	0	0	0	0	0	0	0	1	1	0	1	0	0	1	0	0	0	0	0	1	0	0	0	0	0	0	0	0	0	0	0	1	0
YBR159W	0	0	0	0	0	0	0	0	0	0	0	1	0	0	1	0	0	0	0	0	0	0	0	0	1	0	0	0	0	0	0	1	0	0	0	1	0	0	0	0	0	0	0	0	0	0	0	0	0
YBR160W	0	0	0	0	0	0	0	0	0	0	0	0	0	0	0	0	0	0	0	0	0	0	0	1	0	0	0	0	0	0	0	0	0	0	0	0	0	0	0	0	0	0	0	0	0	0	0	0	0
YBR161W	1	0	0	0	0	0	0	0	0	0	0	0	0	0	1	0	0	0	0	0	0	0	0	0	0	0	0	0	0	0	0	1	0	0	0	0	0	0	0	0	0	0	0	0	0	0	0	0	0
YBR162C	0	0	1	0	0	0	0	0	0	0	0	1	0	0	1	1	0	0	0	0	0	0	0	0	1	0	0	0	0	1	0	0	0	0	0	1	0	0	0	0	1	0	0	0	0	0	0	1	0
YBR162W-A	1	0	1	0	0	0	0	0	0	0	0	0	0	0	1	0	0	1	0	0	1	0	1	1	1	1	0	0	0	1	0	0	0	0	0	0	0	0	0	0	0	0	0	0	0	0	0	0	0
YBR163W	1	0	0	0	0	0	0	0	1	0	0	0	0	0	1	0	0	0	0	0	0	0	0	0	1	0	0	0	0	0	0	0	0	0	0	0	0	1	0	0	0	0	0	0	1	0	0	1	0
YBR164C	0	0	0	0	0	0	0	0	0	0	0	0	0	0	0	0	0	1	0	0	1	0	0	1	0	1	0	0	0	1	0	0	0	0	0	0	0	0	0	0	0	0	0	0	0	0	0	0	0
YBR165W	1	0	0	0	0	0	0	0	1	0	0	0	0	0	1	0	0	0	0	0	0	0	0	0	1	0	0	0	0	0	0	0	0	0	0	1	0	0	0	0	0	0	0	0	0	0	0	1	0
YBR166C	0	0	0	0	0	0	0	0	0	0	0	0	0	0	0	0	0	0	0	0	1	0	0	0	0	0	0	0	0	1	0	0	0	0	0	0	0	0	0	0	0	0	0	0	0	0	0	0	0
YBR167C	1	0	0	0	0	0	0	0	0	0	0	0	0	0	1	0	0	0	0	0	1	0	1	0	1	1	0	0	0	0	0	0	0	0	0	0	0	0	0	0	0	0	0	0	0	0	0	0	0
YBR168W	1	0	0	0	0	0	0	0	0	0	0	0	0	0	1	0	0	0	0	0	0	0	0	1	1	0	0	0	0	0	0	0	0	0	0	0	0	0	0	0	0	0	0	0	1	0	0	1	0
YBR169C	1	0	0	0	0	0	0	0	0	0	0	0	0	0	0	0	0	0	0	0	0	0	0	1	0	0	0	0	0	0	0	0	0	0	0	0	0	0	0	0	0	0	0	0	0	0	0	0	0
YBR170C	1	0	0	0	0	0	0	0	0	0	0	0	0	0	1	0	0	0	0	0	0	0	0	1	0	0	0	0	0	0	0	0	0	0	0	0	0	0	0	0	0	0	0	0	0	0	0	0	0
YBR171W	0	0	0	0	0	0	0	0	0	0	1	0	0	0	1	0	0	0	0	0	1	0	0	1	0	0	0	0	0	0	0	0	0	0	0	0	0	0	0	0	0	0	0	0	0	0	0	0	0
YBR172C	1	0	1	0	0	0	0	0	1	0	0	0	0	0	0	0	0	0	0	0	0	0	0	1	1	0	0	0	0	1	0	0	0	0	0	1	0	0	0	0	0	0	0	0	0	0	0	0	0
YBR173C	0	0	1	0	0	0	0	0	0	0	0	0	0	0	1	0	0	1	0	0	1	0	0	1	0	1	0	0	0	0	0	0	0	0	0	0	0	0	0	0	0	0	0	0	0	0	0	1	0
YBR175W	1	0	0	0	0	0	0	0	0	0	1	0	0	0	1	0	0	0	0	0	1	0	0	0	1	0	0	0	0	0	0	0	0	0	0	0	0	0	0	0	0	0	0	0	0	0	0	1	0
YBR176W	1	0	0	0	0	0	0	0	0	0	0	0	0	0	1	0	0	0	0	0	0	0	0	0	0	0	0	0	0	0	0	0	0	0	0	1	0	0	0	0	0	0	0	0	0	0	0	0	0
YBR177C	0	0	0	0	0	0	0	0	0	0	0	0	0	0	0	0	0	0	0	0	0	0	0	0	0	0	0	0	0	0	0	0	0	0	0	0	0	0	0	0	0	0	0	0	0	0	0	1	0
YBR179C	1	0	0	0	0	0	0	0	1	0	0	0	0	0	1	0	0	0	0	0	0	0	0	0	0	0	0	0	0	0	0	0	0	0	0	1	0	0	0	0	0	0	0	0	0	0	0	0	0
YBR180W	0	0	0	0	0	0	0	0	0	0	0	0	0	0	0	0	0	0	0	0	0	0	0	1	0	0	0	0	0	0	0	0	0	0	0	0	0	0	0	0	0	0	0	0	0	0	0	0	0
YBR181C	0	0	0	0	0	0	0	0	0	0	1	1	0	0	1	0	0	0	0	1	1	0	0	1	0	1	0	0	0	1	0	0	1	0	0	1	0	0	0	0	0	0	0	0	0	0	0	1	0
YBR182C	0	0	0	0	0	0	0	0	0	0	0	0	0	0	0	0	0	0	0	0	0	0	0	0	0	0	0	0	0	0	0	0	0	0	0	1	0	0	0	0	0	0	0	0	0	0	0	0	0
YBR183W	1	0	0	0	0	0	0	0	0	0	0	0	0	0	0	0	0	1	0	0	1	0	0	1	0	0	0	0	0	0	0	1	0	0	0	1	0	0	0	0	0	0	0	0	0	0	0	0	0
YBR184W	0	0	0	0	0	0	0	0	0	0	0	0	0	0	0	0	0	0	0	0	0	0	0	0	0	0	0	0	0	0	0	0	0	0	0	0	0	0	0	0	0	0	0	0	1	0	0	0	0
YBR185C	1	0	0	0	0	0	0	0	0	0	0	0	0	0	1	0	0	0	0	0	0	0	0	0	0	0	0	0	0	0	0	0	0	0	0	1	0	0	0	0	0	0	0	0	0	0	0	0	0
YBR187W	0	0	0	0	0	0	0	0	0	1	1	0	0	0	0	0	0	1	0	0	1	0	0	1	0	0	1	0	0	0	0	1	0	0	0	0	0	0	0	0	0	0	0	0	0	0	0	1	0
YBR188C	0	0	0	0	0	0	0	0	0	0	0	0	0	0	0	0	0	1	0	1	1	0	0	1	0	0	0	0	0	0	0	0	0	0	0	0	0	0	0	0	0	0	0	0	0	0	0	0	0
YBR189W	0	0	0	0	0	0	0	0	0	1	1	1	0	0	1	0	0	0	0	1	1	0	1	0	1	1	0	0	0	0	0	0	1	0	0	1	0	0	1	0	0	0	0	0	0	0	0	0	0
YBR191W	0	0	0	0	0	0	0	0	0	0	0	0	0	0	1	0	0	1	0	0	1	0	0	1	1	1	0	0	0	1	0	0	0	0	0	0	0	0	0	0	0	0	0	0	0	0	0	0	0
YBR192W	1	0	0	0	0	0	0	0	1	0	0	0	0	0	1	0	0	0	0	0	0	0	0	1	1	1	0	0	0	0	0	1	0	0	0	1	0	0	0	0	0	0	0	0	0	0	0	0	0
YBR193C	1	0	0	0	0	0	0	0	0	0	0	0	0	0	1	0	0	0	0	0	1	0	0	1	0	0	0	0	0	0	0	0	0	0	0	0	0	0	0	0	0	0	0	0	1	0	0	0	0
YBR194W	1	0	0	0	0	0	0	0	0	0	0	0	0	0	1	0	0	1	0	0	1	0	0	1	0	0	0	0	0	0	0	0	0	0	0	0	0	0	0	0	0	0	0	0	0	0	0	1	0
YBR195C	0	0	0	0	0	0	0	0	0	0	0	0	0	0	1	0	0	0	0	0	1	0	0	0	0	0	0	0	0	0	0	0	0	0	0	0	0	0	0	0	0	0	0	0	1	0	0	0	0
YBR196C	0	0	0	0	0	0	0	0	0	0	0	1	0	0	1	0	0	0	0	0	0	0	0	0	0	0	0	0	0	1	0	1	0	0	0	1	0	0	1	0	0	0	0	0	0	0	0	0	0
YBR197C	1	0	0	0	0	0	0	0	0	0	0	0	0	0	1	0	0	1	0	0	0	0	0	1	0	0	0	0	0	0	0	0	0	0	0	0	0	0	0	1	0	0	0	0	1	0	0	0	0
YBR198C	1	0	0	0	0	0	0	0	0	0	0	0	0	0	1	0	0	0	0	0	0	0	1	0	1	0	0	0	0	1	0	0	0	0	0	1	0	0	0	0	1	0	0	0	0	0	0	0	0
YBR199W	1	0	0	0	0	0	0	0	0	0	0	0	0	0	1	0	0	0	0	0	0	0	0	0	0	0	0	0	0	1	0	1	0	0	0	0	0	0	0	0	0	0	0	0	0	0	0	0	0
YBR200W	1	0	0	0	0	0	0	0	0	0	0	0	0	0	0	0	0	0	0	0	0	0	0	1	1	0	0	0	0	0	0	1	0	0	0	0	0	0	0	0	0	0	0	0	0	0	0	0	0
YBR201C-A	0	0	0	0	0	0	0	0	0	0	0	0	0	0	0	0	0	0	0	0	0	0	0	1	0	0	0	0	0	0	0	0	0	0	0	0	0	0	0	0	0	0	0	0	0	0	0	0	0
YBR201W	1	0	0	0	0	0	0	0	0	0	0	0	0	0	1	0	0	0	0	0	0	0	0	0	0	0	0	0	0	0	0	0	0	0	0	1	0	0	0	0	0	0	0	0	0	0	0	0	0
YBR202W	1	0	0	0	0	0	0	0	1	0	0	0	0	0	0	0	0	0	0	0	0	0	0	1	1	0	0	0	0	0	0	0	0	0	0	0	0	0	0	0	0	0	0	0	0	0	0	1	0
YBR203W	0	0	1	0	0	0	0	0	1	0	0	0	0	0	0	0	0	0	0	0	0	0	0	1	0	0	0	0	0	0	0	0	0	0	0	0	0	0	0	0	0	0	0	0	0	0	0	1	0
YBR204C	0	0	0	0	0	0	0	0	0	0	0	0	0	0	1	0	0	0	0	0	0	0	0	1	0	0	0	0	0	0	0	1	0	0	0	0	0	0	0	0	0	0	0	0	0	0	0	0	0
YBR205W	0	0	0	0	0	0	0	0	0	0	0	0	0	0	0	0	0	0	0	0	0	0	0	1	1	0	0	0	0	0	0	1	0	0	0	0	0	0	0	0	0	0	0	0	0	0	0	0	0
YBR206W	0	0	0	0	0	0	0	0	0	0	0	0	0	0	0	0	0	1	0	0	1	0	0	1	0	0	0	0	0	0	0	1	0	0	0	0	0	0	0	0	0	0	0	0	0	0	0	0	0
YBR207W	1	0	0	0	0	0	0	0	1	0	0	0	0	0	1	0	0	0	0	0	0	0	0	0	0	0	0	0	0	0	0	0	0	0	0	1	0	0	0	0	0	0	0	0	0	0	0	1	0
YBR208C	1	0	0	0	0	0	0	0	1	0	0	0	0	0	1	1	0	0	0	0	0	0	0	0	0	0	0	0	0	0	0	0	0	0	0	0	0	0	0	0	0	0	0	0	0	0	0	0	0
YBR210W	0	0	0	0	0	0	0	0	0	0	0	0	0	0	0	0	0	1	0	1	1	0	0	1	1	1	0	0	0	0	0	0	0	0	0	0	0	0	0	0	0	0	0	0	0	0	0	1	0
YBR211C	1	0	0	0	0	0	0	0	1	0	0	0	0	0	1	0	0	1	0	0	0	0	0	1	1	0	0	0	0	0	0	0	0	0	0	1	0	0	0	0	0	0	0	0	0	0	0	1	0
YBR212W	1	0	1	0	0	0	0	0	1	0	0	0	0	0	1	0	0	0	0	0	0	0	0	0	0	0	0	0	0	0	0	1	0	0	0	0	0	0	0	0	1	0	0	0	0	0	0	1	0
YBR213W	1	0	0	0	0	0	0	0	0	0	0	0	0	0	0	0	0	0	0	0	0	0	0	0	0	0	0	0	0	0	0	0	0	0	0	1	0	0	0	0	0	0	0	0	0	0	0	0	0
YBR214W	1	0	1	0	0	0	0	0	1	0	0	0	0	0	0	0	0	0	0	0	0	0	0	1	0	0	0	0	0	0	0	0	0	0	0	0	0	0	0	0	0	0	0	0	0	0	0	0	0
YBR215W	1	0	1	0	0	0	0	0	0	0	0	0	0	0	1	0	0	0	0	0	0	0	0	1	0	0	0	0	0	0	0	0	0	0	0	0	0	1	0	0	0	0	0	0	0	0	0	0	0
YBR216C	0	0	0	0	0	0	0	0	1	0	0	0	0	0	0	0	0	0	0	0	0	0	0	1	0	0	0	0	0	0	0	0	0	0	0	0	0	0	0	0	1	0	0	0	1	0	0	0	0
YBR217W	1	0	0	0	0	0	0	0	0	0	0	0	0	0	1	0	0	1	0	0	1	0	1	1	1	0	0	0	0	0	0	0	0	0	0	0	0	0	0	0	0	0	0	0	0	0	0	0	0
YBR218C	0	0	0	0	0	0	0	0	1	0	0	0	0	0	1	0	0	0	0	0	0	0	0	0	1	0	0	0	0	1	0	1	0	0	0	0	0	0	0	0	0	0	0	0	0	0	0	0	0
YBR219C	0	0	0	0	0	0	0	0	0	0	0	0	0	0	1	0	0	0	0	0	0	0	0	0	0	0	0	0	0	0	0	0	0	0	0	0	0	0	0	0	0	0	0	0	1	0	0	0	0
YBR220C	0	0	0	0	0	0	0	0	0	0	0	0	0	0	0	0	0	0	0	0	0	0	0	0	0	0	0	0	0	0	0	0	0	0	0	0	0	0	0	0	1	0	0	0	1	0	0	0	0
YBR221C	0	0	0	0	0	0	0	0	0	0	1	0	0	0	1	0	0	0	0	0	0	0	0	1	1	0	0	0	0	1	0	0	0	0	0	1	0	0	0	0	0	0	0	0	0	0	0	0	0
YBR222C	0	0	0	0	0	0	0	0	0	0	0	0	0	0	0	0	0	0	0	0	0	0	1	0	0	0	0	0	0	0	0	1	0	0	0	1	0	0	0	0	1	0	0	0	0	0	0	0	0
YBR223C	1	0	0	0	0	0	0	0	0	0	0	0	0	0	0	0	0	0	0	0	0	0	0	1	1	0	0	0	0	0	0	0	0	0	0	1	0	0	0	0	0	0	0	0	1	0	0	0	0
YBR225W	1	0	1	0	0	0	0	0	1	0	0	1	0	0	1	0	0	0	0	0	0	0	0	0	1	0	0	0	0	0	0	0	0	0	0	0	0	0	0	0	0	0	0	0	0	0	0	1	0
YBR227C	0	0	0	0	0	0	0	0	0	0	0	0	0	0	0	0	0	0	0	0	0	0	0	1	0	0	0	0	0	0	0	0	0	0	0	0	0	0	0	0	0	0	0	0	0	0	0	0	0
YBR228W	1	0	0	0	0	0	0	0	0	0	0	0	0	0	1	0	0	0	0	0	0	0	0	0	1	0	0	0	0	0	0	0	0	0	0	0	0	0	0	0	0	0	0	0	1	0	0	1	0
YBR229C	0	0	1	0	0	0	0	0	1	0	0	0	0	0	0	0	0	0	0	0	0	0	0	1	0	0	0	0	0	1	0	1	0	0	0	0	0	0	0	0	1	0	0	0	0	0	0	0	0
YBR230C	1	0	1	0	0	0	0	0	0	0	0	0	0	0	0	0	0	1	0	0	1	0	0	1	0	0	0	0	0	0	0	0	1	0	0	0	0	0	0	0	0	0	0	0	0	0	0	1	0
YBR230W-A	0	0	0	0	0	0	0	0	0	0	0	0	0	0	0	0	0	0	0	0	1	0	0	1	0	1	0	0	0	0	0	0	0	0	0	0	0	0	0	0	0	0	0	0	0	0	0	0	0
YBR231C	1	0	0	0	0	0	0	0	0	1	0	0	0	0	1	0	0	0	0	0	0	0	0	0	0	1	0	0	0	0	0	0	0	0	0	0	0	0	0	0	0	0	0	0	0	0	0	0	0
YBR232C	0	0	1	0	0	0	0	0	0	0	0	0	0	0	0	0	0	0	0	0	0	0	0	0	0	0	0	0	0	0	0	0	0	0	0	0	0	0	0	0	0	0	0	0	0	0	0	0	0
YBR233W	1	0	1	0	0	0	0	0	0	0	0	0	0	0	1	0	0	0	0	0	0	0	0	0	1	0	0	0	0	0	0	0	0	0	0	0	0	0	0	0	1	0	0	0	0	0	0	0	0
YBR233W-A	0	0	0	0	0	0	0	0	0	0	0	0	0	0	0	0	0	0	0	0	1	0	0	0	1	0	0	0	0	0	0	0	0	0	0	0	0	0	0	0	0	0	0	0	0	0	0	0	0
YBR234C	0	0	0	0	0	0	0	0	0	0	0	0	0	0	1	0	0	0	0	0	1	0	0	1	0	1	0	0	0	0	0	0	0	0	0	0	0	0	0	0	0	0	0	0	0	0	0	0	0
YBR235W	1	0	1	0	0	0	0	0	1	0	0	0	0	0	1	0	0	0	0	0	0	0	0	0	0	0	0	0	0	0	0	1	0	0	0	0	0	0	0	0	0	0	0	0	0	0	0	1	0
YBR236C	1	0	0	0	0	0	0	0	0	0	0	0	0	0	0	1	0	0	0	0	0	0	0	1	0	0	0	0	0	0	0	0	0	0	0	0	0	0	0	0	0	0	0	0	0	0	0	0	0
YBR237W	1	0	0	0	0	0	0	0	1	0	0	0	0	0	1	0	0	0	0	0	0	0	0	1	1	0	0	0	0	0	0	0	0	0	0	1	0	0	0	0	0	0	0	0	1	0	0	0	0
YBR238C	1	0	1	0	0	0	0	0	1	0	0	0	0	0	1	0	0	0	0	0	0	0	0	0	1	0	0	0	0	1	0	1	0	0	0	0	0	0	0	0	0	0	0	0	0	0	0	1	0
YBR239C	1	0	1	0	0	0	0	0	0	0	0	0	0	0	0	0	0	0	0	0	0	0	0	1	0	0	0	0	0	0	0	0	0	0	0	0	0	0	0	0	0	0	0	0	0	0	0	0	0
YBR241C	0	0	0	0	0	0	0	0	0	0	0	0	0	0	0	0	0	0	0	0	0	0	0	0	0	0	0	0	0	0	0	0	0	0	0	0	0	0	0	0	0	0	0	0	0	0	0	1	0
YBR242W	1	0	0	0	0	0	0	0	0	0	0	0	0	0	1	0	0	1	0	0	1	0	0	1	1	1	0	0	0	0	0	0	0	0	0	0	0	0	0	0	0	0	0	0	0	0	0	1	0
YBR243C	0	0	0	0	0	0	0	0	0	0	1	0	0	0	0	0	0	0	0	0	0	0	0	0	0	0	0	0	0	0	0	1	0	0	0	0	0	0	0	0	0	0	0	0	0	0	0	1	0
YBR244W	0	0	0	0	0	0	0	0	0	0	1	0	0	0	1	0	0	0	0	0	1	0	0	1	0	0	0	0	0	0	0	0	0	0	0	0	0	0	0	0	0	0	0	0	0	0	0	0	0
YBR245C	0	0	0	0	0	0	0	0	0	0	0	0	0	0	1	0	0	0	0	0	0	0	0	1	0	0	0	0	0	1	0	1	0	0	0	0	0	0	0	0	0	0	0	0	0	0	0	0	0
YBR247C	1	0	0	0	0	0	0	0	0	0	0	1	0	0	1	0	0	0	0	0	0	0	1	0	1	0	0	0	0	0	0	1	0	0	0	0	0	0	0	0	0	0	0	0	0	0	0	0	0
YBR248C	1	0	0	0	0	0	0	0	0	0	0	0	0	0	1	0	0	0	0	0	0	0	0	0	0	0	0	0	0	0	0	0	0	0	0	0	0	0	0	0	0	0	0	0	0	0	0	0	0
YBR249C	0	0	0	0	0	0	0	0	0	0	0	0	0	0	1	0	0	0	0	0	0	0	0	0	1	0	0	0	0	1	0	0	0	0	0	0	0	0	0	0	0	0	0	0	0	0	0	0	0
YBR250W	0	0	0	0	0	0	0	0	1	0	0	0	0	0	0	0	0	0	0	0	0	0	0	0	0	0	0	0	0	0	0	0	0	0	0	0	0	0	0	0	0	0	0	0	1	0	0	0	0
YBR251W	1	0	0	0	0	0	0	0	0	0	0	0	0	0	1	0	0	0	0	0	0	0	0	1	0	0	0	0	0	0	0	0	0	0	0	1	0	0	0	0	0	0	0	0	0	0	0	0	0
YBR252W	0	0	0	0	0	0	0	0	0	0	0	0	0	0	0	0	0	1	0	0	1	0	1	1	1	1	0	0	0	0	0	0	0	0	0	1	0	0	0	0	0	0	0	0	0	0	0	0	0
YBR253W	1	0	0	0	0	0	0	0	0	0	0	0	0	0	1	0	0	0	0	0	1	0	0	1	1	0	0	0	0	0	0	0	0	0	0	1	0	0	0	0	0	0	0	0	1	0	0	0	0
YBR254C	1	0	0	0	0	0	0	0	0	0	0	0	0	0	1	0	0	1	0	0	1	0	0	0	1	1	0	0	0	0	0	0	0	0	0	0	0	0	0	0	0	0	0	0	0	0	0	1	0
YBR255C-A	0	0	0	0	0	0	0	0	0	1	0	1	0	0	0	0	0	0	0	0	1	0	0	1	0	1	0	0	0	0	0	0	0	0	0	0	0	0	0	0	0	0	0	0	0	0	0	1	0
YBR255W	1	0	0	0	0	0	0	0	1	0	0	0	0	0	1	0	0	0	0	0	0	0	0	0	0	0	0	0	0	0	0	0	0	0	0	0	0	0	0	0	0	0	0	0	0	0	0	0	0
YBR256C	0	0	0	0	0	0	0	0	0	0	1	0	0	0	0	0	0	0	0	1	1	0	0	1	0	0	0	0	0	0	0	0	0	0	0	0	0	0	0	0	0	0	0	0	0	0	0	0	0
YBR257W	1	0	0	0	0	0	0	0	0	0	0	0	0	0	0	0	0	0	0	0	1	0	0	1	0	0	0	0	0	0	0	0	0	0	0	0	0	0	0	0	0	0	0	0	0	0	0	0	0
YBR258C	1	0	0	0	0	0	0	0	0	0	0	0	0	0	1	0	0	0	0	0	0	0	0	0	0	0	0	0	0	0	0	0	1	0	0	1	0	0	0	0	0	0	0	0	0	0	0	0	0
YBR259W	1	0	0	0	0	0	0	0	1	0	0	0	0	0	1	0	0	0	0	0	0	0	0	0	1	0	0	0	0	0	0	0	0	0	0	1	0	0	0	0	0	0	0	0	0	0	0	0	0
YBR260C	1	0	0	0	0	0	0	0	1	0	0	0	0	0	0	0	0	0	0	0	0	0	1	0	1	0	0	0	0	0	0	0	0	0	0	0	0	0	0	0	0	0	0	0	0	0	0	0	0
YBR261C	0	0	0	0	0	0	0	0	0	0	1	0	0	0	0	0	0	0	0	1	0	0	0	1	1	1	0	0	0	0	0	0	0	0	0	0	0	0	0	0	0	0	0	0	0	0	0	0	0
YBR262C	1	0	0	0	0	0	0	0	0	0	1	0	0	0	1	0	0	1	0	1	1	0	0	1	1	1	0	0	0	0	0	0	0	0	0	1	0	0	0	0	0	0	0	0	0	0	0	1	0
YBR263W	0	0	0	0	0	0	0	0	0	0	1	0	0	0	0	0	0	0	0	0	0	0	0	1	0	0	0	0	0	0	0	0	1	0	0	0	0	0	0	0	1	1	0	0	0	0	0	0	0
YBR264C	1	0	0	0	0	0	0	0	0	0	0	0	0	0	0	0	0	0	0	1	0	0	0	1	0	1	0	0	0	0	0	0	0	0	0	0	0	0	0	0	0	0	0	0	0	0	0	0	0
YBR265W	0	0	0	0	0	0	0	0	0	0	0	0	0	0	1	0	0	0	0	0	0	0	0	0	1	0	0	0	0	0	0	0	0	0	0	0	0	0	0	0	0	0	0	0	0	0	0	0	0
YBR266C	0	0	0	0	0	0	0	0	0	0	0	0	0	0	0	0	0	0	0	0	0	0	1	0	0	0	0	0	0	0	0	0	0	0	0	0	0	0	0	0	0	0	0	0	0	0	0	0	0
YBR267W	1	0	0	0	0	0	0	0	0	0	0	0	0	0	1	0	0	0	0	0	0	0	1	0	0	0	0	0	0	0	0	0	0	0	0	1	0	0	0	0	0	0	0	0	0	0	0	0	0
YBR268W	1	0	0	0	0	0	0	0	0	1	1	0	0	0	1	0	0	1	0	1	1	0	0	1	1	1	0	0	0	0	0	0	0	0	0	1	0	0	0	0	0	0	0	0	0	0	0	0	0
YBR269C	1	0	0	0	0	0	0	0	0	0	1	0	0	0	1	0	0	0	0	1	1	0	0	1	0	0	0	0	0	0	0	0	0	0	0	0	0	0	0	0	0	0	0	0	0	0	0	0	0
YBR270C	1	0	0	0	0	0	0	0	1	0	0	0	0	0	1	0	0	0	0	0	0	0	0	0	0	0	0	0	0	0	0	0	0	0	0	1	0	0	0	0	0	0	0	0	1	0	0	0	0
YBR271W	1	0	0	0	0	0	0	0	0	0	0	0	0	0	1	0	0	0	0	0	0	0	1	0	0	0	0	0	0	0	0	0	1	0	0	0	0	0	0	0	0	0	0	0	0	0	0	0	0
YBR272C	1	0	0	0	0	0	0	0	0	0	0	0	0	0	1	0	0	0	0	0	0	0	1	0	0	0	0	0	0	0	0	1	0	0	0	0	0	0	0	0	0	0	0	0	0	0	0	0	0
YBR273C	0	0	0	0	0	0	0	0	0	0	0	0	0	0	1	0	0	0	0	0	0	0	0	0	0	0	0	0	0	0	0	0	0	0	0	0	0	0	0	0	0	0	0	0	0	0	0	0	0
YBR274W	1	0	0	0	0	0	0	0	1	0	0	0	0	0	0	0	0	0	0	0	0	0	0	0	1	0	0	0	0	0	0	0	0	0	0	0	0	0	0	0	0	0	0	0	0	0	0	0	0
YBR275C	1	0	0	0	0	0	0	0	1	0	0	0	0	0	0	0	0	0	0	0	0	0	0	0	0	0	0	0	0	0	0	0	0	0	0	1	0	0	0	0	0	0	0	0	0	0	0	0	0
YBR276C	1	0	0	0	0	0	0	0	1	0	0	0	0	0	1	1	0	0	0	0	0	0	0	1	1	0	0	0	0	0	0	0	0	0	0	0	0	0	0	0	0	0	0	0	0	0	0	0	0
YBR278W	1	0	0	0	0	0	0	0	0	1	1	0	0	0	1	0	0	1	0	0	1	0	1	1	1	0	0	0	0	0	0	0	0	0	0	0	0	0	0	0	0	0	0	0	1	0	0	0	0
YBR279W	1	0	0	0	0	0	0	0	0	0	0	0	0	0	1	0	0	0	0	0	0	0	0	1	1	0	0	0	0	1	0	1	1	0	0	0	0	0	0	0	0	0	0	0	0	0	0	0	0
YBR280C	1	0	0	0	0	0	0	0	1	0	0	0	0	0	0	0	0	0	0	0	0	0	0	0	0	0	0	0	0	0	0	0	0	0	0	0	0	0	0	0	0	0	0	0	0	0	0	0	0
YBR281C	0	0	0	0	0	0	0	0	1	0	0	0	0	0	0	0	0	0	0	0	0	0	0	0	0	0	0	0	0	1	0	0	0	0	0	0	0	0	0	0	1	0	0	0	0	0	0	0	0
YBR282W	1	0	0	0	0	0	0	0	0	0	0	0	0	0	1	0	0	0	0	0	1	0	0	1	0	1	0	0	0	0	0	0	0	0	0	1	0	0	0	0	0	0	0	0	0	0	0	0	0
YBR283C	0	0	1	0	0	0	0	0	1	0	0	0	0	0	1	0	0	0	0	0	0	0	0	1	1	0	1	0	0	0	0	1	0	0	0	1	0	0	0	0	0	0	0	0	0	0	0	1	0
YBR284W	0	0	0	0	0	0	0	0	1	0	0	0	0	0	0	0	0	0	0	0	0	0	0	0	0	0	0	0	0	0	0	0	0	0	0	1	0	0	0	0	0	0	0	0	0	0	0	0	0
YBR285W	0	0	0	0	0	0	0	0	0	0	0	0	0	0	0	0	0	0	0	0	0	0	0	1	0	0	0	0	0	0	0	0	0	0	0	0	0	0	0	0	0	0	0	0	0	0	0	0	0
YBR286W	0	0	0	0	0	0	0	0	0	0	0	1	0	0	1	0	0	0	0	0	0	0	0	1	1	0	0	0	0	1	0	1	0	0	0	0	0	0	0	0	1	0	0	0	0	0	0	0	0
YBR287W	0	0	0	0	0	0	0	0	0	0	0	0	0	0	0	0	0	0	0	0	0	0	0	0	0	0	0	0	0	0	0	0	0	0	0	0	0	0	0	0	0	0	0	0	0	0	1	1	0
YBR288C	0	0	0	0	0	0	0	0	0	0	0	0	0	0	1	0	0	0	0	0	0	0	0	0	0	0	0	0	0	0	0	0	0	0	0	0	0	0	0	0	0	0	0	0	0	0	0	0	0
YBR289W	1	0	1	0	0	0	0	0	1	0	0	0	0	0	1	0	0	0	1	0	0	0	0	0	1	0	0	0	0	0	0	0	0	0	0	1	0	0	0	0	0	0	0	0	0	0	0	0	0
YBR290W	1	0	0	0	0	0	0	0	0	1	0	0	0	0	1	0	0	1	0	0	0	0	0	1	0	1	0	0	0	0	0	0	0	0	0	1	0	0	0	0	0	0	0	0	0	0	0	0	0
YBR291C	1	0	0	0	0	0	0	0	0	0	1	0	0	0	0	0	0	0	0	1	1	0	0	0	1	0	0	0	0	0	0	0	0	0	0	0	0	0	0	0	0	0	0	0	0	0	0	0	0
YBR293W	1	0	1	0	0	0	0	0	1	0	0	0	0	0	1	1	0	0	0	0	0	0	0	0	0	0	0	0	0	0	0	0	0	0	0	0	0	0	0	0	0	0	0	0	0	0	0	1	0
YBR295W	1	0	0	0	0	0	0	0	1	0	0	0	0	0	0	0	0	0	0	0	0	0	0	0	0	0	0	0	0	0	0	0	0	0	0	0	0	0	0	0	0	0	0	0	0	0	0	0	0
YBR296C	1	0	0	0	0	0	0	0	0	0	0	0	0	0	1	0	0	0	0	0	0	0	0	0	0	0	0	0	0	0	0	0	0	0	0	0	0	0	0	0	0	0	0	0	0	0	0	0	0
YBR297W	1	0	0	0	0	0	0	0	1	0	0	0	0	0	0	0	0	0	0	0	0	0	0	1	1	0	0	0	0	0	0	0	0	0	0	0	0	0	0	0	0	0	0	0	0	0	0	0	0
YBR298C	0	0	0	0	0	0	0	0	1	0	0	0	0	0	0	0	0	0	0	0	0	0	0	1	0	0	0	0	0	0	0	0	0	0	0	0	0	0	0	0	0	0	0	0	0	0	0	0	0
YBR299W	0	0	1	0	0	0	0	0	1	0	0	0	0	0	0	0	0	0	0	0	0	0	0	0	0	0	0	0	0	0	0	0	0	0	0	0	0	0	0	0	0	0	0	0	0	0	0	0	0
YBR301W	0	0	0	0	0	0	0	0	0	0	0	0	0	0	0	0	0	0	0	0	1	0	0	0	0	0	0	0	0	0	0	0	0	0	0	0	0	0	0	0	0	0	0	0	1	0	0	0	0
YBR302C	0	0	0	0	0	0	0	0	0	0	0	0	0	0	0	0	0	0	0	0	1	0	0	0	0	0	0	0	0	0	0	1	0	0	0	0	0	0	0	0	0	0	0	0	0	0	0	1	0
YCL001W	0	0	0	0	0	0	0	0	0	0	1	0	0	0	1	0	0	0	0	1	1	0	0	1	0	0	0	0	0	0	0	0	0	0	0	0	0	0	0	0	0	0	0	0	0	0	0	1	0
YCL001W-B	0	0	0	0	0	0	0	0	0	0	0	0	0	0	0	0	0	0	0	0	0	0	0	1	0	0	0	0	0	0	0	0	0	0	0	0	0	0	0	0	0	0	0	0	0	0	0	0	0
YCL002C	1	0	0	0	0	0	0	0	1	0	0	0	0	0	1	0	0	0	0	0	1	0	0	1	1	0	1	0	0	0	0	0	0	0	0	0	0	0	0	1	0	0	0	0	0	0	0	1	0
YCL004W	1	0	1	0	0	0	0	0	0	0	0	0	0	0	1	0	0	1	0	0	0	0	0	1	0	0	0	0	0	0	0	0	0	0	0	1	0	0	0	0	1	0	0	0	1	0	0	0	0
YCL005W	1	0	0	0	0	0	0	0	0	0	0	0	0	0	1	0	0	1	0	0	1	0	0	0	0	0	1	0	0	0	0	0	0	0	0	0	0	1	0	0	0	0	0	0	0	0	0	1	0
YCL005W-A	0	0	0	0	0	0	0	0	0	0	1	1	0	0	0	0	0	1	0	1	1	0	0	1	1	0	0	0	0	0	0	0	1	0	0	0	0	0	0	0	0	0	0	0	0	0	0	1	0
YCL008C	0	0	1	0	0	0	0	0	0	0	0	0	0	0	1	0	0	1	0	0	0	0	0	0	0	0	0	0	0	0	0	1	0	0	0	0	0	0	0	0	1	0	0	0	0	0	0	1	0
YCL009C	0	0	0	0	0	0	0	0	0	0	1	0	0	0	1	0	0	0	0	1	0	0	0	1	1	0	0	0	0	0	0	0	0	0	0	0	0	0	0	0	0	0	0	0	0	0	0	0	0
YCL010C	1	0	0	0	0	0	0	0	1	0	0	0	0	0	1	0	0	0	0	0	0	0	0	0	0	0	0	0	0	0	0	0	0	0	0	0	0	0	0	0	0	0	0	0	0	0	0	0	0
YCL011C	0	0	0	0	0	0	0	0	0	0	0	0	0	0	1	1	0	0	0	0	0	0	0	0	0	0	0	0	0	1	0	0	0	0	0	0	0	0	0	0	0	0	0	0	1	0	0	0	0
YCL012C	0	0	0	0	0	0	0	0	0	0	0	0	0	0	0	0	0	0	0	0	1	0	0	1	0	0	0	0	0	0	0	0	0	0	0	0	0	0	0	0	0	0	0	0	0	0	0	0	0
YCL014W	1	0	0	0	0	0	0	0	1	0	0	0	0	0	0	0	0	0	0	0	0	0	0	1	0	0	0	0	0	0	0	0	0	0	0	0	0	0	0	0	0	0	0	0	0	0	0	0	0
YCL016C	0	0	0	0	0	0	0	0	0	0	0	0	0	0	0	0	0	1	0	0	0	0	0	0	0	0	0	0	0	0	0	0	0	0	0	0	0	0	0	0	0	0	0	0	0	0	0	0	0
YCL017C	0	0	0	0	0	0	0	0	0	0	0	0	0	0	1	0	0	0	0	0	0	0	1	0	0	0	0	0	0	1	0	0	0	0	0	1	0	0	0	0	0	0	0	0	0	0	0	0	0
YCL018W	0	0	0	0	0	0	0	0	0	0	0	0	0	0	0	0	0	0	0	0	0	0	0	0	0	0	0	0	0	0	0	0	0	0	0	0	0	0	0	0	0	0	0	0	1	0	0	0	0
YCL019W	0	0	1	0	0	0	0	0	0	0	0	0	0	0	0	0	0	0	0	0	0	0	0	0	0	0	0	0	0	0	0	0	0	0	0	0	0	0	0	0	0	0	0	0	0	0	0	0	0
YCL020W	0	0	1	0	0	0	0	0	0	0	0	0	0	0	0	0	0	0	0	0	0	0	0	0	0	0	0	0	0	0	0	0	0	0	0	0	0	0	0	0	0	0	0	0	0	0	0	0	0
YCL021W-A	0	0	0	0	0	0	0	0	1	0	0	0	0	0	0	0	0	0	0	0	1	0	0	0	0	0	0	0	0	0	0	0	0	0	0	0	0	0	0	0	0	0	0	0	0	0	0	1	0
YCL024W	1	0	0	0	0	0	0	0	0	0	0	0	0	0	1	0	0	0	0	0	0	0	0	0	0	0	0	0	0	0	0	0	0	0	0	0	0	0	0	0	0	0	0	0	0	0	0	0	0
YCL025C	1	0	0	0	0	0	0	0	1	0	0	1	0	0	0	0	0	0	0	0	0	0	0	0	1	0	0	0	0	0	0	0	0	0	0	0	0	0	0	0	1	0	0	0	0	0	0	1	0
YCL026C-B	0	0	0	0	0	0	0	0	0	0	0	0	0	0	0	0	0	0	0	0	0	0	0	1	0	0	0	0	0	0	0	0	0	0	0	0	0	0	0	0	0	0	0	0	0	0	0	0	0
YCL027W	0	0	1	0	0	0	0	0	0	0	0	0	0	0	1	0	0	0	0	0	0	0	1	0	1	0	0	0	0	0	0	0	0	0	0	1	0	0	0	0	0	0	0	0	0	0	0	0	0
YCL028W	0	0	1	0	0	0	0	0	0	0	0	0	0	0	1	0	0	1	0	0	0	0	0	0	0	1	0	0	0	0	0	1	0	0	0	0	0	0	0	0	0	0	0	0	0	0	0	1	0
YCL029C	1	0	0	0	0	0	0	0	1	0	0	0	0	0	1	0	0	0	0	0	0	0	0	0	0	0	0	0	0	0	0	0	0	0	0	0	0	0	0	0	1	0	0	0	0	0	0	0	0
YCL030C	0	0	0	0	0	0	0	0	0	0	1	0	0	0	1	0	0	0	0	0	0	0	0	0	0	0	0	0	0	0	0	1	0	0	0	0	0	0	0	0	1	0	0	0	0	0	0	0	0
YCL031C	1	0	1	0	0	0	0	0	0	0	0	0	0	0	1	0	0	0	0	0	1	0	0	1	1	0	0	0	0	1	0	0	0	0	0	0	0	0	0	0	0	0	0	0	0	0	0	0	0
YCL032W	1	0	0	0	0	0	0	0	0	0	1	0	0	0	1	0	0	0	0	0	0	0	0	0	1	0	0	0	0	0	0	0	0	0	0	1	0	0	0	0	0	0	0	0	0	0	0	0	0
YCL033C	0	0	0	0	0	0	0	0	0	0	1	0	0	0	0	0	0	0	0	1	1	0	0	1	0	1	0	0	0	0	0	0	0	0	0	0	0	0	0	0	0	0	0	0	0	0	0	0	0
YCL034W	1	0	0	0	0	0	0	0	0	0	1	0	0	0	1	0	0	0	0	1	0	0	0	1	1	1	0	0	0	0	0	0	0	0	0	0	0	0	0	0	0	0	0	0	0	0	0	0	0
YCL035C	1	0	0	0	0	0	0	0	0	0	1	0	0	0	0	0	0	1	0	0	1	0	0	1	0	1	0	0	0	0	0	1	0	0	0	0	0	0	0	0	0	0	0	0	0	0	0	0	0
YCL036W	1	0	0	0	0	0	0	0	0	0	0	0	0	0	1	1	0	0	0	0	0	0	0	0	0	0	0	0	0	0	0	0	0	0	0	1	0	0	0	0	0	0	0	0	0	0	0	0	0
YCL037C	0	0	1	0	0	0	0	0	0	0	0	0	0	0	1	0	0	0	1	0	0	0	0	0	0	0	0	0	0	1	0	1	0	0	0	0	0	0	1	0	0	0	0	0	1	0	0	1	0
YCL038C	1	0	0	0	0	0	0	0	0	0	0	0	0	0	0	0	0	0	0	0	0	0	0	0	0	0	0	0	0	0	0	1	0	0	0	0	0	0	0	0	0	0	0	0	0	0	0	1	0
YCL039W	1	0	0	0	0	0	0	0	1	0	0	0	0	0	1	0	0	1	0	0	1	0	0	1	0	0	0	0	0	0	0	0	0	0	0	0	0	0	0	0	0	0	0	0	1	0	0	0	0
YCL040W	1	0	0	0	0	0	0	0	0	0	0	0	0	0	1	0	0	1	0	0	0	0	0	1	0	0	0	0	0	1	0	0	0	0	0	1	0	0	0	0	0	0	0	0	0	0	0	0	0
YCL042W	0	0	1	0	0	0	0	0	0	0	0	0	0	0	1	0	0	1	0	0	0	0	0	0	0	1	0	0	0	1	0	0	0	0	0	0	0	0	0	0	0	0	0	0	0	0	0	0	0
YCL043C	0	0	0	0	0	0	0	0	0	0	0	1	0	0	1	0	0	0	0	0	0	0	0	0	0	0	0	0	0	0	0	1	0	0	0	0	0	0	0	0	0	0	0	0	0	0	0	0	0
YCL044C	1	0	1	0	0	0	0	0	0	0	0	0	0	0	0	0	0	1	0	0	0	0	0	1	1	0	0	0	0	0	0	1	0	1	0	0	0	0	0	0	1	0	0	0	0	0	0	0	0
YCL045C	0	0	0	0	0	0	0	0	0	0	0	0	0	0	1	0	0	0	0	0	0	0	0	1	0	0	0	0	0	1	0	1	0	0	0	0	0	0	0	0	1	0	0	0	0	0	0	1	0
YCL047C	0	0	0	0	0	0	0	0	0	0	0	0	0	0	0	0	0	0	0	0	1	0	0	0	0	0	0	0	0	0	0	0	0	0	0	0	0	0	0	0	0	0	0	0	0	0	0	0	0
YCL048W	0	0	0	0	0	0	0	0	0	0	0	0	0	0	0	0	0	0	0	0	0	0	0	0	0	0	0	0	0	0	0	0	0	0	0	0	0	0	0	0	0	0	0	0	0	0	0	0	0
YCL048W-A	0	0	0	0	0	0	0	0	0	0	0	0	0	0	0	0	0	0	0	0	0	0	0	1	0	0	0	0	0	0	0	0	0	0	0	0	0	0	0	0	0	0	0	0	0	0	0	0	0
YCL049C	1	0	0	0	0	0	0	0	0	0	0	0	0	0	1	0	0	1	0	0	0	0	0	0	0	0	0	0	0	0	0	0	0	0	0	1	0	0	0	0	0	0	0	0	0	0	1	0	0
YCL050C	0	0	0	0	0	0	0	0	0	0	0	0	0	0	0	0	0	0	0	0	1	0	0	0	0	0	0	0	0	1	0	0	0	0	0	0	0	0	0	0	0	0	0	0	0	0	0	0	0
YCL051W	1	0	0	0	0	0	0	0	1	0	0	0	0	0	1	1	0	0	0	0	0	0	0	0	1	0	0	0	0	0	0	0	0	0	0	1	0	0	0	0	0	0	0	0	0	0	0	0	0
YCL052C	1	0	0	0	0	0	0	0	1	0	1	0	0	0	0	0	0	0	0	1	0	0	0	1	0	0	0	0	0	0	0	0	0	0	0	0	0	0	0	0	0	0	0	0	0	0	0	0	0
YCL054W	1	0	0	0	0	0	0	0	0	1	0	0	0	0	1	0	0	0	0	0	0	0	1	0	1	0	0	0	0	1	0	1	0	0	0	1	0	0	0	0	0	0	0	0	0	0	0	0	0
YCL055W	0	0	0	0	0	0	0	0	0	0	0	0	0	0	1	0	0	1	0	0	1	0	0	1	0	0	0	0	0	1	0	0	0	0	0	0	0	0	0	0	0	0	0	0	0	0	0	0	0
YCL056C	1	0	0	0	0	0	0	0	0	0	0	0	0	0	1	0	0	0	0	0	1	0	0	1	1	0	0	0	0	0	0	0	0	0	0	0	0	0	0	0	0	0	0	0	0	0	0	0	0
YCL057C-A	0	0	0	0	0	0	0	0	0	0	1	0	0	0	1	0	0	0	0	1	1	0	0	1	0	1	0	0	0	0	0	0	0	0	0	1	0	0	0	0	0	0	0	0	0	0	0	0	0
YCL057W	0	0	0	0	0	0	0	0	0	0	1	0	0	0	0	0	0	0	0	0	0	0	0	1	0	0	0	0	0	1	0	1	0	0	0	0	0	0	0	0	0	0	0	0	0	0	0	0	0
YCL058C	0	0	0	0	0	0	0	0	0	0	0	0	0	0	1	0	0	0	0	0	0	0	0	0	0	0	0	0	0	0	0	0	0	0	0	0	0	0	0	0	0	0	0	0	0	0	0	0	0
YCL058W-A	0	0	0	0	0	0	0	0	0	0	0	0	0	0	1	0	0	0	0	0	0	0	0	0	0	0	0	0	0	0	0	0	0	0	0	0	0	0	0	0	0	0	0	0	0	0	0	0	0
YCL059C	0	0	0	0	0	0	0	0	0	0	0	0	0	0	1	0	0	0	0	0	0	0	0	0	1	0	0	0	0	1	0	1	0	0	0	0	0	0	0	0	0	0	0	0	0	0	0	0	0
YCL061C	1	0	0	0	0	0	0	0	1	0	0	0	0	0	1	0	0	0	0	0	0	0	0	0	1	0	0	0	0	0	0	0	0	0	0	0	0	0	0	0	0	0	0	0	0	0	0	0	0
YCL063W	1	0	0	0	0	0	0	0	0	0	0	0	0	0	1	0	0	0	0	0	0	0	0	0	1	0	0	0	0	0	0	1	0	0	0	0	0	0	0	0	1	0	0	0	0	0	0	1	0
YCL064C	0	0	0	0	0	0	0	0	0	0	0	0	0	0	1	0	0	0	0	0	1	0	0	0	0	0	0	0	0	0	0	1	0	0	0	0	0	0	0	0	0	0	0	0	0	0	0	0	0
YCL067C	0	0	0	0	0	0	0	0	0	0	0	0	0	0	0	0	0	1	0	0	1	0	0	1	0	0	0	0	0	0	0	0	0	0	0	0	1	0	0	0	0	0	0	0	0	0	0	0	0
YCL068C	0	0	1	0	0	0	0	0	0	0	0	0	0	0	0	0	0	1	0	0	0	0	0	1	0	0	0	0	0	0	0	0	0	0	0	0	0	0	0	0	0	0	0	0	0	0	0	0	0
YCL073C	0	0	0	0	0	0	0	0	1	0	0	0	0	0	0	0	0	0	0	0	0	0	0	0	0	0	0	0	0	0	0	0	0	0	0	0	0	0	0	0	0	0	0	0	0	0	0	0	0
YCLX04W	0	0	1	0	0	0	0	0	0	0	0	0	0	0	0	0	0	0	0	0	0	0	0	0	0	0	0	0	0	0	0	0	0	0	0	0	0	0	0	0	0	0	0	0	0	0	0	0	0
YCR002C	0	0	0	0	0	0	0	0	0	0	0	0	0	0	0	0	0	0	0	0	1	0	0	1	0	0	0	0	0	0	0	0	0	0	0	0	0	0	0	0	0	0	0	0	0	0	0	0	0
YCR003W	1	0	0	0	0	0	0	0	0	0	1	0	0	0	1	0	0	1	0	1	1	0	1	1	1	1	0	0	0	0	0	0	0	0	0	1	0	0	0	0	0	0	0	0	0	0	0	0	0
YCR004C	0	0	0	0	0	0	0	0	0	0	0	0	0	0	1	0	0	0	0	0	0	0	0	1	1	0	0	0	0	0	0	0	0	0	0	0	0	0	0	0	0	0	0	0	0	0	0	0	0
YCR005C	1	0	0	0	0	0	0	0	0	0	0	0	0	0	1	0	0	0	0	0	1	0	0	0	0	0	0	0	0	0	0	0	0	0	0	1	0	0	0	0	0	0	0	0	0	0	0	1	0
YCR007C	1	0	0	0	0	0	0	0	0	0	0	0	0	0	0	0	0	0	0	0	1	0	0	1	0	0	0	0	0	0	0	0	0	0	0	0	0	0	0	0	0	0	0	0	0	0	0	1	0
YCR008W	1	0	1	0	0	0	0	0	1	0	0	0	0	0	1	0	0	0	0	0	0	0	0	1	1	0	0	0	0	1	0	0	0	0	0	1	0	0	0	0	0	0	0	0	0	0	0	0	0
YCR009C	0	0	0	0	0	0	0	0	0	0	1	0	0	0	1	0	0	1	0	0	0	0	0	1	0	0	0	0	0	1	0	0	0	0	0	0	0	0	0	1	0	0	0	0	0	0	0	0	0
YCR011C	0	0	0	0	0	0	0	0	1	0	0	0	0	0	0	0	0	0	0	0	0	0	0	0	0	0	0	0	0	0	0	1	0	0	0	0	0	0	0	0	0	0	0	0	0	0	0	0	0
YCR012W	0	0	0	0	0	0	0	0	0	0	0	1	0	0	1	0	0	0	0	0	0	0	0	1	0	0	0	0	0	1	0	0	1	0	0	1	0	0	0	0	0	0	0	0	0	0	0	0	0
YCR014C	0	0	0	0	0	0	0	0	0	0	0	0	0	0	0	0	0	0	0	0	0	0	0	0	0	0	0	0	0	0	0	0	0	0	0	0	0	0	0	0	0	0	0	0	1	0	0	0	0
YCR015C	1	0	0	0	0	0	0	0	0	0	0	1	0	0	1	0	0	0	0	0	0	0	0	0	1	0	0	0	0	0	0	0	0	0	0	1	0	0	0	1	0	0	0	0	0	0	0	0	0
YCR016W	1	0	0	0	0	0	0	0	0	0	0	0	0	0	0	0	0	0	0	0	0	0	0	1	1	0	0	0	0	1	0	1	0	0	0	0	0	0	0	0	0	0	0	0	0	0	0	0	0
YCR017C	0	0	0	0	0	0	0	0	1	0	0	0	0	0	1	0	0	0	0	0	1	0	0	1	0	0	0	0	0	0	0	1	0	0	0	0	0	0	0	0	0	0	0	0	0	0	0	0	0
YCR018C	0	0	0	0	0	0	0	0	0	0	0	0	0	0	1	0	0	1	0	0	1	0	0	1	0	0	0	0	0	0	0	0	0	0	0	0	0	0	0	0	0	0	0	0	0	0	0	1	0
YCR018C-A	0	0	0	0	0	0	0	0	0	0	0	0	0	0	0	0	0	1	0	0	1	0	0	0	0	0	0	0	0	0	0	0	0	0	0	0	0	0	0	0	0	0	0	0	0	0	0	1	0
YCR019W	0	0	0	0	0	0	0	0	0	0	0	0	0	0	0	0	0	0	0	0	1	0	0	1	0	0	0	0	0	0	0	0	0	0	0	0	0	0	0	0	0	0	0	0	0	0	0	0	0
YCR020C	0	0	0	0	0	0	0	0	0	0	0	0	0	0	0	0	0	0	0	0	0	0	0	1	0	0	0	0	0	0	0	0	0	0	0	0	0	0	0	0	0	0	0	0	1	0	0	0	0
YCR020C-A	1	0	0	0	0	0	0	0	0	0	1	0	0	0	1	0	0	0	0	0	1	0	0	1	1	0	0	0	0	0	0	0	0	0	0	0	0	0	0	0	0	0	0	0	0	0	0	1	0
YCR020W-B	0	0	0	0	0	0	0	0	0	0	0	0	0	0	1	0	0	0	0	0	1	0	0	1	0	0	0	0	0	0	0	0	0	0	0	0	0	0	0	0	0	0	0	0	1	0	0	0	0
YCR021C	0	0	0	1	0	0	0	0	0	0	0	0	0	0	1	0	0	1	0	0	1	0	0	1	0	0	0	0	0	0	0	0	0	0	0	0	0	0	0	0	0	0	0	0	0	0	0	1	0
YCR022C	0	0	1	0	0	0	0	0	0	0	0	0	0	0	0	0	0	0	0	0	0	0	0	0	0	0	0	0	0	0	0	0	0	0	0	0	0	0	0	0	0	0	0	0	0	0	0	0	0
YCR023C	1	0	0	0	0	0	0	0	1	0	0	0	0	0	1	0	0	1	0	0	0	0	0	1	0	0	0	0	0	0	0	0	0	0	0	1	0	0	0	0	0	0	0	0	1	0	0	0	0
YCR024C	1	0	0	0	0	0	0	0	0	0	0	0	0	0	0	0	0	0	0	0	0	0	0	0	0	0	0	0	0	0	0	0	0	0	0	1	0	0	0	0	0	0	0	0	0	0	0	0	0
YCR024C-A	1	0	0	0	0	0	0	0	0	0	0	1	0	0	1	0	0	0	0	1	1	0	0	0	1	0	0	0	0	1	0	1	0	0	0	1	1	0	0	0	0	0	0	1	1	0	0	1	0
YCR024C-B	0	0	0	0	0	0	0	0	0	0	0	1	0	0	1	0	0	0	0	0	1	0	0	1	1	0	0	0	0	0	0	1	0	0	0	0	0	0	0	0	0	0	0	0	0	0	0	1	0
YCR026C	1	0	0	0	0	0	0	0	1	0	0	0	0	0	1	0	0	0	0	0	0	0	0	0	0	0	0	0	0	0	0	1	0	0	0	0	0	0	0	0	0	0	0	0	0	0	0	0	0
YCR027C	0	0	0	0	0	0	0	0	0	0	0	0	0	0	0	0	0	0	0	1	0	0	0	1	0	0	0	0	0	0	0	0	0	0	0	1	0	0	0	0	0	0	0	0	0	0	0	0	0
YCR028C	0	0	0	0	0	0	0	0	1	0	0	0	0	0	0	0	0	0	0	0	0	0	0	0	0	0	0	0	0	0	0	1	0	0	0	0	0	0	0	0	0	0	0	0	0	0	0	1	0
YCR028C-A	0	0	0	0	0	0	0	0	0	0	1	0	0	0	1	0	0	0	0	1	1	0	0	1	1	0	0	0	0	0	0	0	0	0	0	1	0	0	0	0	0	0	0	0	0	0	0	1	0
YCR030C	1	0	1	0	0	0	0	0	1	0	0	0	0	0	1	0	0	0	0	0	0	0	1	0	1	0	0	0	0	0	0	1	0	0	0	0	0	0	0	0	0	0	0	0	0	0	0	0	0
YCR031C	0	0	0	0	0	0	0	0	0	0	1	1	0	0	1	0	0	1	0	1	1	0	1	1	1	1	0	0	0	1	0	0	1	0	0	1	0	0	1	0	0	0	0	0	0	0	0	0	0
YCR032W	0	0	0	0	0	0	0	0	0	0	0	0	0	0	0	0	0	0	0	0	0	0	0	0	0	0	0	0	0	0	0	0	0	0	0	1	0	0	0	0	0	0	0	0	0	0	0	0	0
YCR033W	1	0	1	0	0	1	0	0	0	0	0	0	0	0	1	1	0	0	0	0	0	0	0	0	0	0	0	0	0	1	0	0	0	0	0	1	0	0	0	0	0	0	0	0	0	0	0	1	0
YCR034W	0	0	0	0	0	0	0	0	0	0	0	0	0	0	1	0	0	1	0	0	1	0	0	0	1	1	0	0	0	0	0	1	0	0	0	0	0	0	0	0	0	0	0	0	0	0	0	1	0
YCR035C	1	0	0	0	0	0	0	0	0	0	0	0	0	0	1	0	0	0	0	1	0	0	1	1	1	0	0	0	0	1	0	0	0	0	0	0	0	0	0	0	0	0	0	0	0	0	0	0	0
YCR036W	1	0	0	0	0	0	0	0	0	0	0	0	0	0	1	0	0	0	0	0	1	0	0	1	0	1	0	0	0	0	0	0	0	0	0	0	0	0	0	0	0	0	0	0	0	0	0	0	0
YCR037C	1	0	0	0	0	0	0	0	1	0	0	0	0	0	0	0	0	0	0	0	1	0	0	0	0	0	0	0	0	0	0	0	0	0	0	1	0	0	0	0	0	0	0	0	0	0	0	1	0
YCR038C	1	0	1	0	0	0	0	0	0	0	0	0	0	0	1	0	0	0	0	0	0	0	0	0	1	0	0	0	0	0	0	0	0	0	0	0	0	0	0	0	0	0	0	0	0	0	0	0	0
YCR039C	0	0	0	0	0	0	0	0	0	0	0	0	0	0	0	0	0	1	0	0	1	0	0	1	0	0	0	0	0	0	0	0	0	0	0	0	0	0	0	0	0	0	0	0	0	0	0	0	0
YCR042C	1	0	0	0	0	0	0	0	1	0	0	0	0	0	1	0	0	0	0	0	0	0	0	0	0	0	0	0	0	1	0	0	0	0	0	1	0	0	0	0	0	0	0	0	0	0	0	0	0
YCR043C	0	0	0	0	0	0	0	0	0	0	1	0	0	0	1	0	0	1	0	1	1	0	0	1	0	0	0	0	0	0	0	0	0	0	0	0	0	0	0	0	0	0	0	0	0	0	0	1	0
YCR044C	0	0	0	0	0	0	0	0	0	0	1	0	0	0	0	0	0	0	0	1	1	0	0	0	0	0	0	0	0	0	0	0	0	0	0	0	0	0	0	0	0	0	0	0	0	0	0	1	0
YCR046C	0	0	0	0	0	0	0	0	0	0	0	0	0	0	1	0	0	1	0	0	1	0	1	1	0	1	0	0	0	0	0	0	0	0	0	1	0	0	0	0	0	0	0	0	0	0	0	1	0
YCR047C	1	0	0	0	0	0	0	0	0	0	1	0	0	0	1	0	0	0	0	1	0	0	1	0	1	1	0	0	0	0	0	0	0	0	0	0	0	0	0	0	1	0	0	0	0	0	0	0	0
YCR048W	1	0	0	0	0	0	0	0	1	0	1	0	0	0	1	0	0	0	0	0	0	0	0	0	0	0	0	0	0	0	0	0	0	0	0	0	0	0	0	0	0	0	0	0	0	0	0	1	0
YCR051W	0	0	0	0	0	0	0	0	0	0	1	0	0	0	0	0	0	0	0	1	1	0	1	0	0	1	0	0	0	0	0	0	0	0	0	0	0	0	0	0	0	0	0	0	0	0	0	0	0
YCR052W	1	0	0	0	0	0	0	0	0	0	0	0	0	0	0	0	0	0	0	0	0	0	0	0	0	0	0	0	0	0	0	0	0	0	0	0	0	0	0	0	0	0	0	0	0	0	0	0	0
YCR053W	0	0	0	0	0	0	0	0	0	0	0	1	0	0	1	0	0	0	0	0	0	0	0	0	0	0	0	0	0	1	0	1	0	0	0	0	0	0	0	0	0	0	0	0	0	0	0	1	0
YCR054C	0	0	0	0	0	0	0	0	0	0	0	0	0	0	0	0	0	0	0	0	0	0	0	1	0	0	0	0	0	0	0	1	0	0	0	0	0	0	0	0	0	0	0	0	0	0	0	0	0
YCR057C	0	0	0	0	0	0	0	0	1	0	0	0	0	0	0	0	0	0	0	0	0	0	1	1	1	0	0	0	0	0	0	1	0	0	0	0	0	0	0	0	0	0	0	0	0	0	0	0	0
YCR059C	1	0	0	0	0	0	0	0	0	0	0	0	0	0	1	0	0	1	0	0	1	0	0	0	0	1	0	0	0	0	0	0	0	0	0	0	0	0	0	0	0	0	0	0	0	0	0	0	0
YCR060W	0	0	0	0	0	0	0	0	0	0	1	0	0	0	0	0	0	1	0	0	1	0	0	1	0	1	0	0	0	0	0	0	0	0	0	0	0	0	0	0	0	0	0	0	0	0	0	1	0
YCR061W	0	0	1	0	0	0	0	0	1	0	0	0	0	0	0	0	0	0	0	0	0	0	0	0	0	0	0	0	0	0	0	1	0	0	0	0	1	0	0	0	1	0	0	0	0	0	0	1	0
YCR062W	0	0	1	0	0	0	0	0	0	0	0	0	0	0	0	0	0	0	0	0	0	0	0	0	0	0	0	0	0	0	0	0	0	0	0	0	0	0	0	0	0	0	0	0	0	0	0	0	0
YCR063W	1	0	1	0	0	0	0	0	0	0	0	0	0	0	1	0	0	1	0	0	0	0	0	1	0	0	0	0	0	0	0	0	0	0	0	0	0	0	0	0	0	0	0	0	1	0	0	1	0
YCR065W	1	0	1	0	0	0	0	0	1	0	0	0	0	0	1	0	0	0	0	0	0	0	0	0	1	0	0	0	0	0	0	0	0	0	0	0	0	0	0	0	0	0	0	0	1	0	0	0	0
YCR066W	1	0	1	0	0	0	0	0	0	0	0	0	0	0	1	0	0	0	0	0	0	0	0	1	1	0	0	0	0	0	0	0	0	0	0	1	0	0	0	0	0	0	0	0	0	0	0	0	0
YCR067C	0	0	1	0	0	0	0	0	1	0	0	0	0	0	0	0	0	0	0	0	0	0	0	0	0	0	0	0	0	0	0	0	0	0	0	0	0	0	0	0	0	0	0	0	0	0	0	0	0
YCR068W	0	0	0	0	0	0	0	0	1	0	0	0	0	0	0	0	0	0	0	0	0	0	0	1	0	0	0	0	0	0	0	0	0	0	0	0	0	0	0	0	0	0	0	0	0	0	0	0	0
YCR069W	1	0	0	0	0	0	0	0	0	0	0	0	0	0	0	0	0	0	0	0	0	0	0	0	0	0	0	0	0	0	0	0	0	0	0	1	0	0	0	0	0	0	0	0	0	0	0	0	0
YCR071C	1	0	0	0	0	0	0	0	0	0	1	0	0	0	1	0	0	1	0	1	1	0	0	1	1	1	0	0	0	0	0	0	0	0	0	1	0	0	0	0	0	0	0	0	0	0	0	0	0
YCR072C	1	0	0	0	0	0	0	0	0	0	0	0	0	0	1	0	0	0	0	0	0	0	0	0	0	0	0	0	0	0	0	0	0	0	0	0	0	0	0	0	0	0	0	0	0	0	0	0	0
YCR073C	1	0	1	0	0	0	0	0	1	0	1	0	0	0	0	0	0	0	0	0	0	0	0	1	1	0	0	0	0	0	0	0	0	0	0	0	0	0	0	0	0	0	0	0	0	0	0	0	0
YCR073W-A	0	0	0	0	0	0	0	0	0	0	1	0	0	0	0	0	0	0	0	1	1	0	0	0	0	0	0	0	0	0	0	0	0	0	0	0	0	0	0	0	0	0	0	0	0	0	0	0	0
YCR075C	1	0	0	0	0	0	0	0	0	0	0	1	0	0	1	0	0	1	0	0	1	0	0	0	0	0	0	0	0	0	0	0	1	0	0	0	0	0	0	0	0	0	0	0	0	0	0	1	0
YCR075W-A	0	0	0	0	0	0	0	0	0	0	0	0	0	0	0	0	0	1	0	0	1	0	1	1	0	0	0	0	0	0	0	0	0	0	0	0	0	0	0	0	0	0	0	0	0	0	0	0	0
YCR076C	1	0	0	0	0	0	0	0	0	0	1	0	0	0	1	0	0	1	0	1	1	0	0	0	1	1	0	0	0	0	0	0	0	0	0	0	0	0	0	0	0	0	0	0	0	0	0	0	0
YCR077C	0	0	0	0	0	0	0	0	1	0	0	0	0	0	1	0	0	0	0	0	0	0	0	0	1	0	0	0	0	1	0	0	0	0	0	1	0	0	0	0	0	0	0	0	0	0	0	1	0
YCR079W	1	0	1	0	0	0	0	0	1	0	0	0	0	0	1	0	0	0	0	0	0	0	0	0	1	0	0	0	0	0	0	0	0	0	0	0	0	0	0	0	0	0	0	0	0	0	0	1	0
YCR081W	1	0	0	0	0	0	0	0	1	0	0	0	0	0	1	0	0	0	0	0	0	0	0	0	1	0	0	0	0	0	0	0	0	0	0	0	0	0	0	0	0	0	0	0	1	0	0	0	0
YCR082W	1	0	0	0	0	0	0	0	0	0	0	0	0	0	1	0	0	1	0	1	1	0	0	1	1	1	1	0	0	0	0	0	0	0	0	0	0	0	0	0	0	0	0	0	0	0	0	0	0
YCR083W	1	0	0	0	0	0	0	0	0	0	1	0	0	0	1	0	0	1	0	0	1	0	0	1	1	1	0	0	0	0	0	0	0	0	0	0	0	0	0	0	0	0	0	0	0	0	0	1	0
YCR084C	0	0	0	0	0	0	0	0	0	0	0	0	0	0	0	1	0	0	0	0	0	0	0	0	0	0	0	0	0	1	0	1	0	0	0	1	0	0	0	0	1	0	0	0	0	0	0	1	0
YCR086W	0	0	0	0	0	0	0	0	0	0	0	0	0	0	0	0	0	0	0	0	1	0	0	0	0	0	0	0	0	0	0	0	0	0	0	0	0	0	0	0	0	0	0	0	0	0	0	0	0
YCR087C-A	0	0	0	0	0	0	0	0	0	0	0	0	0	0	0	0	0	1	0	0	1	0	0	0	0	1	0	0	0	0	0	0	0	0	0	1	0	0	0	0	0	0	0	0	0	0	0	0	0
YCR088W	0	0	0	0	0	0	0	0	0	0	1	0	0	0	1	0	0	0	0	0	0	0	1	1	0	0	0	0	0	1	0	1	0	0	0	0	0	0	0	0	0	0	0	0	0	0	0	0	0
YCR089W	0	0	1	0	0	0	0	0	0	0	0	0	0	0	0	0	0	0	0	0	0	0	0	1	0	0	0	0	0	0	0	0	0	0	0	0	0	0	0	0	0	0	0	0	0	0	0	0	0
YCR090C	1	0	0	0	0	0	0	0	0	0	1	0	0	0	1	0	0	0	0	0	1	0	0	1	1	0	0	0	0	0	0	0	0	0	0	0	0	0	0	0	0	0	0	0	0	0	0	0	0
YCR091W	1	0	1	0	0	0	0	0	1	0	0	0	0	0	0	0	0	0	0	0	0	0	0	1	0	0	0	0	0	0	0	0	0	0	0	0	0	0	0	0	1	0	0	0	0	0	0	0	0
YCR092C	0	0	0	0	0	0	0	0	1	0	0	0	0	0	0	0	0	0	0	0	0	0	0	1	0	0	0	0	0	0	0	0	0	0	0	1	0	0	0	0	0	0	0	0	0	0	0	0	0
YCR093W	1	0	0	0	0	0	0	0	0	0	0	1	0	0	1	0	0	0	0	0	0	0	1	0	0	0	0	0	0	1	0	1	0	0	0	1	0	0	0	0	0	0	0	0	0	0	0	0	0
YCR094W	0	0	0	0	0	0	0	0	0	0	0	0	0	0	0	0	0	0	0	0	0	0	0	1	1	0	0	0	0	0	0	0	0	0	0	0	0	0	0	0	0	0	0	0	0	0	0	0	0
YCR095C	1	0	0	0	0	0	0	0	0	0	0	0	0	0	0	0	0	0	0	0	0	0	0	0	0	0	0	0	0	0	0	0	0	0	0	0	0	0	0	0	0	0	0	0	0	0	0	0	0
YCR096C	0	0	0	0	0	0	0	0	0	0	0	0	0	0	0	0	0	1	0	0	1	0	0	1	0	0	0	0	0	0	0	0	0	0	0	0	0	0	0	0	0	0	0	0	0	0	0	0	0
YCR097W	0	0	0	0	0	0	0	0	0	0	0	0	0	0	0	0	0	1	0	1	1	0	0	1	0	1	0	0	0	1	0	0	0	0	0	0	0	1	0	0	0	0	0	0	0	0	0	0	0
YCR099C	0	0	0	0	0	0	0	0	1	0	0	0	0	0	0	0	0	0	0	0	0	0	0	0	0	0	0	0	0	0	0	0	0	0	0	0	0	0	0	0	0	0	0	0	1	0	0	0	0
YCR100C	0	0	0	0	0	0	0	0	1	0	0	0	0	0	0	0	0	0	0	0	0	0	0	0	0	0	0	0	0	0	0	0	0	0	0	0	0	0	0	0	0	0	0	0	1	0	0	0	0
YCR101C	1	0	0	0	0	0	0	0	1	0	0	0	0	0	0	0	0	0	0	0	0	0	0	1	0	0	0	0	0	0	0	0	0	0	0	1	0	0	0	0	0	0	0	0	0	0	0	0	0
YCR102C	0	0	0	0	0	0	0	0	0	0	0	0	0	0	0	0	0	0	0	0	0	0	0	1	0	0	0	0	0	0	0	0	0	0	0	0	0	0	0	0	0	0	0	0	1	0	0	0	0
YCR104W	0	0	0	0	0	0	0	0	0	0	0	0	0	0	0	0	0	0	0	0	1	0	0	0	0	0	0	0	0	0	0	0	0	0	0	0	0	0	0	0	0	0	0	0	1	0	0	0	0
YCR105W	0	0	1	0	0	0	0	0	0	0	0	0	0	0	0	0	0	0	0	0	0	0	0	1	0	0	0	0	0	0	0	0	0	0	0	0	0	0	0	0	0	0	0	0	0	0	0	0	0
YCR106W	0	0	0	0	0	0	0	0	1	0	0	0	0	0	0	0	0	0	0	0	0	0	0	0	0	0	0	0	0	0	0	0	0	0	0	0	0	0	0	0	0	0	0	0	0	0	0	0	0
YCR107W	0	0	0	0	0	0	0	0	1	0	0	0	0	0	0	0	0	0	0	0	0	0	0	1	0	0	0	0	0	0	0	0	0	0	0	0	0	0	0	0	1	0	0	0	0	0	0	0	0
YCRX01W	0	0	0	0	0	0	0	0	0	0	0	0	0	0	0	0	0	0	0	0	0	0	0	0	0	0	0	0	0	0	1	0	0	0	0	0	0	0	0	0	0	0	0	0	0	0	0	0	0
YCRX02C	0	0	1	0	0	0	0	0	0	0	0	0	0	0	0	0	0	0	0	0	0	0	0	0	1	0	0	0	0	0	0	0	0	0	0	0	0	0	0	0	0	0	0	0	0	0	0	0	0
YCRX06W	0	0	0	0	0	0	0	0	0	0	0	0	0	0	0	0	0	0	0	0	0	0	1	0	0	0	0	0	0	0	0	0	0	0	0	0	0	0	0	0	0	0	0	0	0	0	0	0	0
YCRX07W	0	0	0	0	0	0	0	0	0	0	0	0	0	0	0	0	0	0	0	0	0	0	1	0	0	0	0	0	0	0	0	0	0	0	0	0	0	0	0	0	0	0	0	0	0	0	0	0	0
YCRX11W	0	0	1	0	0	0	0	0	0	0	0	0	0	0	0	0	0	0	0	0	0	0	0	0	0	0	0	0	0	0	0	0	0	0	0	0	0	0	0	0	0	0	0	0	0	0	0	0	0
YCRX18C	0	0	1	0	0	0	0	0	0	0	0	0	0	0	0	0	0	0	0	0	0	0	0	0	0	0	0	0	0	0	0	0	0	0	0	0	0	0	0	0	0	0	0	0	0	0	0	0	0
YDL001W	1	0	0	0	0	0	0	0	0	0	0	0	0	0	1	0	0	0	0	0	0	0	0	1	0	0	0	0	0	0	0	0	0	0	0	1	0	0	0	0	0	0	0	0	0	0	0	0	0
YDL002C	1	0	0	0	0	0	0	0	0	1	1	0	0	0	1	0	0	1	0	0	1	0	0	1	1	0	0	0	0	0	0	0	0	0	0	1	0	0	0	0	0	0	0	0	0	0	0	0	0
YDL003W	1	0	0	0	0	0	0	0	0	1	0	0	0	0	1	0	0	0	0	0	0	0	0	1	1	0	0	0	0	0	0	0	0	0	0	0	0	0	0	0	0	0	0	0	0	0	0	0	0
YDL004W	0	0	0	0	0	0	0	0	0	0	1	0	0	0	1	0	0	1	0	0	1	0	0	1	0	1	0	0	0	0	0	0	0	0	0	0	0	0	0	0	0	0	0	0	0	0	0	1	0
YDL005C	1	0	1	0	0	0	0	0	0	0	0	0	0	0	1	0	0	0	0	0	0	0	0	1	0	0	0	0	0	1	0	1	0	0	0	1	0	0	0	0	0	0	0	0	0	0	0	0	0
YDL006W	1	0	1	0	0	0	0	0	0	0	0	0	0	0	1	0	0	0	0	0	0	0	0	0	0	0	0	0	0	0	0	0	0	0	0	0	0	0	0	0	0	0	0	0	0	0	0	1	0
YDL007W	0	0	0	0	0	0	0	0	0	1	0	1	0	0	1	0	0	0	0	0	0	0	1	1	0	0	0	0	0	1	0	1	0	0	0	1	0	0	0	0	0	0	0	0	0	0	0	0	0
YDL008W	1	0	0	0	0	0	0	0	0	0	0	0	0	0	1	0	0	1	0	0	1	0	0	0	0	1	0	0	0	0	0	0	0	0	0	1	0	0	0	0	0	0	0	1	0	0	0	0	0
YDL010W	1	0	0	0	0	0	0	0	0	1	0	1	0	0	1	0	0	0	0	0	0	0	0	1	0	0	0	0	0	0	0	0	0	0	0	1	0	0	0	0	0	0	0	0	1	0	0	0	0
YDL012C	1	0	1	0	0	0	0	0	0	0	1	0	0	0	1	0	0	0	0	1	1	0	0	0	1	0	0	0	0	0	0	0	0	0	0	0	0	0	0	0	0	0	0	0	0	0	0	0	0
YDL013W	1	0	1	0	0	0	0	0	1	0	0	0	0	0	1	0	0	0	0	0	0	0	0	0	0	0	0	0	0	0	0	0	0	0	0	0	0	0	0	0	0	0	0	0	0	0	0	0	0
YDL014W	0	0	0	0	0	0	0	0	0	1	0	1	0	0	1	0	0	0	0	0	0	0	1	0	1	0	0	0	0	1	0	0	0	0	0	1	0	0	1	0	0	0	0	0	0	0	0	0	0
YDL015C	0	0	0	0	0	0	0	0	0	0	0	0	0	0	0	0	0	0	0	0	0	0	0	0	0	0	0	0	0	0	0	1	0	0	0	0	0	0	0	0	0	0	0	0	0	0	0	1	0
YDL017W	1	0	0	0	0	0	0	0	0	0	0	0	0	0	1	0	0	0	0	0	0	0	0	0	0	0	0	0	0	0	0	0	0	0	0	0	0	0	0	0	0	0	0	0	0	0	0	0	0
YDL018C	1	0	0	0	0	0	0	0	0	0	0	0	0	0	1	0	0	0	0	0	1	0	0	1	0	0	0	0	0	0	0	0	0	0	0	1	0	0	0	0	0	0	0	0	0	0	0	1	0
YDL019C	1	0	0	0	0	0	0	0	1	0	0	0	0	0	1	1	0	0	0	0	0	0	1	0	1	0	0	0	0	0	0	0	0	0	0	0	0	0	0	0	0	0	0	0	0	0	0	0	0
YDL020C	1	0	1	0	0	0	0	0	1	0	0	0	0	0	1	0	0	0	0	0	0	0	0	1	0	0	0	0	0	0	0	0	0	0	0	1	0	0	0	0	0	0	0	0	0	0	0	0	0
YDL021W	1	0	0	0	0	0	0	0	0	0	0	0	0	0	0	0	0	0	0	0	0	0	0	1	0	0	0	0	0	0	0	1	0	0	0	0	0	0	0	0	0	0	0	0	0	0	0	0	0
YDL022W	1	0	0	0	0	0	0	0	0	0	1	1	0	0	1	0	0	0	0	0	1	0	0	1	0	0	0	0	0	0	0	1	0	0	0	1	0	0	0	0	0	0	0	0	0	0	0	0	0
YDL023C	0	0	0	0	0	0	0	0	0	0	0	0	0	0	0	0	0	0	0	0	0	0	0	0	0	0	0	0	0	0	0	0	0	0	0	0	0	0	0	0	0	0	0	0	0	0	0	0	0
YDL024C	0	0	0	0	0	0	0	0	0	0	0	0	0	0	0	0	0	0	0	0	0	0	0	1	0	0	0	0	0	0	0	0	0	0	0	0	0	0	0	0	0	0	0	0	0	0	0	0	0
YDL025C	0	0	1	0	0	0	0	0	1	0	0	1	0	0	0	0	0	0	0	0	0	0	0	1	0	0	0	0	0	0	0	0	0	0	0	1	0	0	0	0	0	0	0	0	0	0	0	0	0
YDL026W	0	0	1	0	0	0	0	0	0	0	0	0	0	0	0	0	0	0	0	0	0	0	0	0	0	0	0	0	0	0	0	0	0	0	0	0	0	0	0	0	0	0	0	0	0	0	0	0	0
YDL027C	1	0	1	0	0	0	0	0	0	0	0	0	0	0	1	0	0	1	0	0	0	0	0	0	0	0	0	0	0	0	0	0	0	0	0	1	0	0	0	0	0	0	0	0	0	0	0	1	0
YDL028C	1	0	0	0	0	0	0	0	1	0	0	0	0	0	1	0	0	0	0	0	0	0	0	1	0	0	0	0	0	0	0	0	0	0	0	0	0	0	0	0	0	0	0	0	0	0	0	1	0
YDL029W	0	0	0	0	0	0	0	0	0	0	1	0	0	0	0	0	0	0	0	1	0	0	0	1	0	1	0	0	0	0	0	1	0	0	0	0	0	0	0	0	0	0	0	0	0	0	0	0	0
YDL030W	1	0	0	0	1	0	0	0	0	0	0	0	0	0	1	0	0	0	0	0	0	0	0	0	1	0	0	0	0	0	0	0	0	0	0	0	0	0	0	0	0	0	0	0	0	0	0	0	0
YDL031W	1	0	0	0	0	0	0	0	0	0	0	0	0	0	1	0	0	0	0	0	0	0	1	1	1	0	0	0	0	0	0	1	0	0	0	1	0	0	0	0	0	0	0	0	0	0	0	0	0
YDL033C	1	0	0	0	0	0	0	0	1	0	0	0	0	0	0	0	0	1	0	0	0	0	0	0	0	0	0	0	0	0	0	0	0	0	0	1	0	0	0	0	1	0	0	0	1	0	0	1	0
YDL035C	1	0	1	0	0	0	0	0	1	0	0	0	0	0	1	1	0	0	0	0	0	0	0	1	0	0	0	0	0	1	0	0	0	1	0	0	0	0	0	0	0	0	0	0	0	0	0	0	0
YDL036C	0	0	0	0	0	0	0	0	0	1	0	0	0	0	1	0	0	0	0	0	0	0	0	1	0	0	0	0	0	0	0	0	0	0	0	0	0	0	0	0	0	0	0	0	0	0	0	0	0
YDL037C	1	0	1	0	0	0	0	0	1	0	0	0	0	0	1	0	0	0	0	0	0	0	0	1	1	0	0	0	0	0	0	0	0	0	0	0	0	0	0	0	0	0	0	0	0	0	0	0	0
YDL038C	0	0	1	0	0	0	0	0	0	0	0	0	0	0	0	0	0	0	0	0	0	0	0	0	0	0	0	0	0	0	0	0	0	0	0	0	0	1	0	0	1	0	0	0	0	0	0	1	0
YDL039C	0	0	1	0	0	0	0	0	0	0	0	0	0	0	1	0	0	0	0	0	0	0	0	0	0	0	0	0	0	0	0	0	0	0	0	0	0	0	0	0	0	0	0	0	1	0	0	0	0
YDL040C	0	0	0	0	0	0	0	0	0	0	0	0	0	0	1	0	0	0	0	0	0	0	0	1	0	0	0	0	0	1	0	1	0	0	0	1	0	0	0	0	0	0	0	0	0	0	0	0	0
YDL042C	1	0	0	0	0	0	0	0	0	0	0	0	0	0	1	0	0	0	0	0	0	0	0	0	1	0	0	0	0	0	0	0	0	0	0	0	0	0	0	0	0	0	0	0	0	0	0	0	0
YDL043C	1	0	0	0	0	0	0	0	0	0	0	0	0	0	1	0	0	0	0	0	0	0	0	0	0	0	0	0	0	0	0	0	0	0	0	0	0	0	0	0	0	0	0	0	0	0	0	0	0
YDL044C	1	0	0	0	0	0	0	0	0	0	0	0	0	0	1	0	0	0	0	0	0	0	0	1	1	0	0	0	0	0	0	0	0	0	0	1	0	0	0	0	0	0	0	0	0	0	0	0	0
YDL045C	1	0	0	0	0	0	0	0	0	0	0	0	0	0	1	0	0	0	0	0	1	0	0	1	0	0	0	0	0	0	0	0	0	0	0	0	0	0	0	0	0	0	0	0	0	0	0	0	0
YDL045W-A	1	0	0	0	0	0	0	0	0	0	1	0	0	0	1	0	0	1	0	1	1	0	0	1	1	0	0	0	0	0	0	0	0	0	0	1	0	0	0	0	0	0	0	0	0	0	0	1	0
YDL046W	0	0	1	0	0	0	0	0	0	0	1	0	0	0	1	1	0	1	0	1	0	0	0	0	1	0	0	0	0	0	0	0	0	0	0	1	0	0	0	0	0	0	0	0	0	0	0	1	0
YDL047W	1	0	0	0	0	0	0	0	0	0	0	0	0	0	1	1	0	0	0	0	0	0	0	1	0	0	0	0	0	0	0	0	0	0	0	0	0	0	0	0	0	0	0	0	0	0	0	1	0
YDL048C	1	0	1	0	0	0	0	0	1	0	1	0	0	0	1	0	0	0	0	0	0	0	0	1	0	0	0	0	0	1	1	0	0	0	0	0	0	0	0	0	0	0	0	0	0	0	0	0	0
YDL049C	1	0	0	0	0	0	0	0	0	0	1	0	0	0	1	0	0	0	0	0	0	0	0	1	0	0	0	0	0	0	0	0	0	0	0	0	0	0	0	0	0	0	0	0	0	0	0	0	0
YDL051W	0	0	0	0	0	0	0	0	0	0	1	0	0	0	1	0	0	1	0	0	1	0	0	0	0	1	0	0	0	1	0	0	0	0	0	0	0	0	0	0	0	0	0	0	0	0	0	0	0
YDL052C	0	0	0	0	0	0	0	0	0	0	1	0	0	0	1	0	0	1	0	1	1	0	0	0	0	0	1	0	0	0	0	0	0	0	0	1	1	0	0	0	0	0	0	0	0	0	0	0	0
YDL053C	1	0	0	0	0	0	0	0	0	0	1	0	0	0	1	0	0	1	0	1	1	0	0	1	1	0	0	0	0	1	0	0	0	0	0	1	0	0	0	0	0	0	0	0	0	0	0	1	0
YDL054C	0	0	1	0	0	0	0	0	0	0	0	0	0	0	0	0	0	0	0	0	0	0	0	0	0	0	0	0	0	0	0	1	0	0	0	0	0	0	0	0	0	0	0	0	0	0	0	1	0
YDL055C	0	0	0	0	0	0	0	0	0	0	0	0	0	0	1	1	0	0	0	0	0	0	0	1	1	0	0	0	0	1	0	0	1	0	0	1	0	0	0	0	0	0	0	0	0	0	0	0	0
YDL056W	1	0	1	0	0	0	0	0	1	0	0	0	0	0	1	0	0	0	0	0	0	0	0	1	0	0	0	0	0	0	0	1	0	0	0	1	0	0	0	0	0	0	0	0	0	0	0	0	0
YDL057W	0	0	0	0	0	0	0	0	0	0	0	0	0	0	1	0	0	0	0	0	0	0	0	0	0	0	0	0	0	0	0	0	0	0	0	0	0	0	0	0	0	0	0	0	0	0	0	0	0
YDL058W	1	0	0	0	0	0	0	0	1	0	0	0	0	0	0	0	0	0	0	0	0	0	0	0	0	0	0	0	0	1	0	0	0	0	0	0	0	0	0	0	0	0	0	0	0	0	0	0	0
YDL060W	0	0	0	0	0	0	0	0	0	0	0	0	0	0	0	0	0	0	0	0	0	0	0	0	0	0	0	0	0	1	0	1	0	0	0	1	0	0	0	0	0	0	0	0	0	0	0	0	0
YDL061C	1	0	0	0	0	0	0	0	0	0	1	1	0	0	1	0	0	1	0	1	1	0	0	1	1	1	0	0	0	0	0	0	1	0	0	1	0	1	0	0	0	0	0	1	0	0	0	1	0
YDL063C	0	0	0	0	0	0	0	0	1	0	0	0	0	0	0	0	0	0	0	0	0	0	0	0	0	0	0	0	0	0	0	0	0	0	0	1	0	0	0	0	0	0	0	0	0	0	0	0	0
YDL064W	0	0	0	0	0	0	0	0	0	0	1	0	0	0	0	0	0	1	0	1	1	0	1	1	1	1	0	0	0	0	0	0	0	0	0	0	0	1	0	0	0	0	0	0	0	0	0	1	0
YDL065C	1	0	0	0	0	0	0	0	0	1	0	0	0	0	1	0	0	0	0	0	0	0	0	0	0	0	0	0	0	1	0	1	0	0	0	1	0	0	0	0	0	0	0	0	0	0	0	0	0
YDL066W	0	0	0	0	0	0	0	0	0	0	0	0	0	0	1	0	0	0	0	0	0	0	0	0	0	0	0	0	0	1	0	1	0	0	0	1	0	0	0	0	0	0	0	0	0	0	0	0	0
YDL067C	1	0	0	0	0	0	0	0	0	0	0	0	0	0	1	0	0	0	0	0	1	0	0	1	1	0	0	0	0	0	0	0	0	0	0	1	0	1	0	0	0	0	0	0	0	0	0	1	0
YDL069C	1	0	0	0	0	0	0	0	0	0	0	0	0	0	1	0	0	0	0	0	0	0	0	0	1	0	0	0	0	0	0	0	0	0	0	0	0	0	0	0	0	0	0	0	0	0	0	0	0
YDL070W	1	0	0	0	0	0	0	0	0	0	0	0	0	0	1	0	0	0	0	0	0	0	1	1	1	0	0	0	0	1	0	0	0	0	0	1	0	0	0	0	0	0	0	0	0	0	0	0	0
YDL071C	0	0	0	0	0	0	0	0	0	0	0	0	0	0	0	0	0	0	0	0	0	0	0	0	1	0	0	0	0	0	0	0	0	0	0	0	0	0	0	0	0	0	0	0	0	0	0	0	0
YDL072C	0	0	1	0	0	0	0	0	0	0	1	0	0	0	0	0	0	1	0	1	1	0	0	0	0	1	0	0	0	1	0	0	0	0	0	0	0	0	0	1	0	0	0	0	0	0	0	1	0
YDL073W	1	0	0	0	0	0	0	0	1	0	0	0	0	0	1	0	0	0	0	0	0	0	0	0	1	0	0	0	0	0	0	0	0	0	0	1	0	0	0	0	0	0	0	0	0	0	0	0	0
YDL074C	1	0	0	0	0	0	0	0	0	0	0	0	0	0	1	0	0	0	0	0	0	0	0	1	1	0	0	0	0	1	0	1	0	0	0	0	0	0	0	0	1	0	0	0	0	0	0	0	0
YDL075W	0	0	0	0	0	0	0	0	0	0	1	1	0	0	1	0	0	1	0	1	1	0	1	1	1	1	0	0	0	1	0	0	1	0	0	1	0	0	0	0	0	0	0	0	0	0	0	0	0
YDL076C	1	0	1	0	0	0	0	0	0	0	0	0	0	0	1	0	0	1	0	1	1	0	0	1	1	0	0	0	0	0	0	0	0	0	0	0	0	0	0	0	0	0	0	0	1	0	0	0	0
YDL077C	1	0	0	0	0	0	0	0	1	0	0	0	0	0	1	0	0	0	0	0	0	0	0	0	0	0	0	0	0	0	0	0	0	0	0	1	0	0	0	0	0	0	0	0	0	0	0	0	0
YDL078C	0	0	0	0	0	0	0	0	0	0	0	1	0	0	1	0	0	0	0	0	0	0	0	0	1	0	0	0	0	1	0	0	0	0	0	0	0	0	0	0	0	0	0	0	0	0	0	0	0
YDL079C	0	0	1	0	0	0	0	0	1	0	0	0	0	0	0	0	0	0	0	0	0	0	0	1	0	0	0	0	0	0	0	0	0	0	0	0	0	0	0	0	0	0	0	0	0	0	0	0	0
YDL080C	1	0	0	0	0	0	0	0	1	0	1	0	0	0	0	0	0	0	0	0	0	0	0	0	0	0	0	0	0	0	0	0	0	0	0	0	0	0	0	0	0	0	0	0	0	0	0	0	0
YDL081C	0	0	0	0	0	0	0	0	0	0	1	1	0	0	1	0	0	0	0	0	1	0	0	1	1	0	0	0	0	0	0	0	0	0	0	1	0	0	0	0	0	0	0	0	0	0	0	1	0
YDL082W	0	0	0	0	0	0	0	0	0	0	1	0	0	0	1	0	0	1	0	0	1	0	0	0	1	0	0	0	0	0	0	0	0	0	0	1	0	0	0	0	0	0	0	0	0	0	0	1	0
YDL083C	0	0	0	0	0	0	0	0	0	0	1	1	0	0	1	0	0	1	0	1	1	0	0	1	1	1	0	0	0	1	0	0	1	0	0	0	0	0	0	1	0	0	0	0	0	0	0	1	0
YDL084W	0	0	0	0	0	0	0	0	0	0	0	0	0	0	1	0	0	0	0	0	0	0	0	1	1	0	0	0	0	1	0	0	0	0	0	0	0	0	0	0	0	0	0	0	0	0	0	0	0
YDL085C-A	0	0	0	0	0	0	0	0	0	0	0	0	0	0	0	0	0	0	0	0	1	0	0	1	0	0	0	0	0	0	0	0	0	0	0	0	0	0	1	0	0	0	0	0	0	0	0	1	0
YDL085W	0	0	0	0	0	0	0	0	1	0	0	0	0	0	0	1	0	0	0	0	0	0	0	1	0	0	0	0	0	0	0	0	0	0	0	0	0	0	0	0	0	0	0	0	0	0	0	0	0
YDL086W	1	0	0	0	0	0	0	0	0	0	0	0	0	0	1	0	0	0	0	0	1	0	1	0	1	0	0	0	0	0	1	0	0	0	0	1	0	0	0	0	0	0	0	0	0	0	0	0	0
YDL087C	1	0	0	0	0	0	0	0	0	0	0	0	0	0	1	0	0	0	0	0	0	0	0	0	0	0	0	0	0	0	0	0	0	0	0	0	0	0	0	0	0	0	0	0	0	0	0	0	0
YDL088C	1	0	1	0	0	0	0	0	0	0	0	0	0	0	1	0	0	0	0	0	0	0	0	1	1	0	0	0	0	0	0	0	0	0	0	0	0	1	0	0	0	0	0	0	1	0	0	1	0
YDL089W	0	0	0	0	0	0	0	0	0	0	0	0	0	0	0	0	0	0	0	0	0	0	0	1	0	0	0	0	0	0	0	0	0	0	0	0	0	0	0	0	0	0	0	0	0	0	0	0	0
YDL090C	1	0	0	0	0	0	0	0	0	0	1	0	0	0	1	0	0	0	0	0	0	0	0	0	0	0	0	0	0	0	0	1	0	0	0	1	0	0	0	0	0	0	0	0	1	0	0	0	0
YDL091C	0	0	0	0	0	0	0	0	0	0	0	0	0	0	0	0	0	0	0	0	0	0	0	1	0	0	0	0	0	0	0	0	0	0	0	0	0	0	0	0	0	0	0	0	0	0	0	0	0
YDL092W	1	0	0	0	0	0	0	0	0	0	1	0	0	0	1	0	0	0	0	1	1	0	0	1	1	1	0	0	0	0	0	0	0	0	0	1	0	0	0	0	0	0	0	0	0	0	0	0	0
YDL093W	0	0	0	0	0	0	0	0	1	0	0	0	0	0	0	0	0	0	0	0	0	0	0	0	0	0	0	0	0	0	0	1	0	0	0	0	0	0	0	0	0	0	0	0	0	0	0	0	0
YDL095W	0	0	0	0	0	0	0	0	1	0	0	0	0	0	1	0	0	0	0	0	0	0	0	0	1	0	0	0	0	1	0	1	0	0	0	0	0	0	0	0	1	0	0	0	0	0	0	0	0
YDL097C	1	0	0	0	0	0	0	0	0	0	0	0	0	0	1	0	0	0	0	0	0	0	0	1	0	0	0	0	0	1	0	1	0	0	0	1	0	0	0	0	0	0	0	0	0	0	0	0	0
YDL098C	1	0	0	0	0	0	0	0	0	0	1	0	0	0	1	0	0	1	0	0	0	0	0	1	1	1	0	0	0	0	0	0	0	0	0	0	0	0	0	0	0	0	0	0	0	0	0	0	0
YDL099W	1	0	0	0	0	0	0	0	0	0	0	0	0	0	1	0	0	0	0	1	0	0	0	1	1	0	0	0	0	1	0	0	0	0	0	0	0	0	0	0	0	0	0	0	0	0	0	0	0
YDL100C	0	0	0	0	0	0	0	0	0	0	0	0	0	0	1	0	0	0	0	0	0	0	1	1	1	0	0	0	0	0	0	0	1	0	0	0	0	0	0	0	0	0	0	0	0	0	0	0	0
YDL101C	1	0	0	0	0	0	0	0	0	0	0	0	0	0	1	0	0	0	0	0	0	0	0	1	0	0	0	0	0	0	0	0	0	0	0	0	0	0	0	0	0	0	0	0	0	0	0	0	0
YDL102W	0	0	0	0	0	0	0	0	1	0	0	0	0	0	1	0	0	0	0	0	0	0	0	0	0	0	0	0	0	0	0	0	0	0	0	0	0	0	0	0	0	0	0	0	0	0	0	0	0
YDL103C	0	0	0	0	0	0	0	0	0	0	1	0	0	0	0	0	0	0	0	1	0	0	0	1	0	0	0	0	0	0	0	1	0	0	0	1	0	0	0	0	0	0	0	0	0	0	0	0	0
YDL104C	1	0	0	0	0	0	0	0	0	0	0	0	0	0	1	0	0	0	0	0	0	0	0	0	0	0	0	0	0	0	0	0	0	0	0	1	0	0	0	0	0	0	0	0	0	0	0	0	0
YDL105W	1	0	0	0	0	0	0	0	0	0	0	0	0	0	1	0	0	0	0	0	0	0	0	1	1	0	0	0	0	0	0	0	0	0	0	0	0	0	0	0	0	0	0	0	0	0	0	0	0
YDL106C	1	0	1	0	0	0	0	0	1	0	0	0	0	0	1	0	0	0	0	0	0	0	0	0	0	0	0	0	0	0	0	0	0	0	0	0	0	0	0	0	0	0	0	0	0	0	0	0	0
YDL107W	1	0	0	0	0	0	0	0	0	0	0	0	0	0	1	0	0	0	0	0	0	0	0	1	0	0	0	0	0	0	0	0	0	0	0	1	0	0	0	0	0	0	0	0	0	0	0	0	0
YDL108W	1	0	0	0	0	0	0	0	0	0	0	0	0	0	1	0	0	0	0	0	0	0	0	0	1	0	0	0	0	0	0	0	0	0	0	0	0	0	0	0	0	0	0	0	0	0	0	0	0
YDL109C	1	0	0	0	0	0	0	0	1	0	0	0	0	0	1	0	0	0	0	0	0	0	0	1	0	0	0	0	0	0	0	0	0	0	0	0	0	0	0	0	0	0	0	0	0	0	0	0	0
YDL110C	1	0	0	0	0	0	0	0	0	0	0	0	0	0	1	0	0	1	0	0	1	0	0	1	0	0	0	0	0	0	0	0	0	0	0	1	0	0	0	0	0	0	0	0	0	0	0	0	0
YDL111C	0	0	0	0	0	0	0	0	0	0	0	0	0	0	1	0	0	1	0	0	1	0	0	0	0	0	0	0	0	1	0	0	0	0	0	0	0	0	0	0	0	0	0	0	0	0	0	0	0
YDL112W	0	0	0	0	0	0	0	0	1	0	0	0	0	0	1	0	0	0	0	0	0	0	1	0	1	0	0	0	0	1	0	1	0	0	0	1	0	0	0	0	0	0	0	0	0	0	0	0	0
YDL113C	1	0	0	0	0	0	0	0	0	0	0	0	0	0	1	0	0	0	0	0	0	0	0	1	0	0	0	0	0	0	0	0	0	0	0	1	0	0	0	0	0	0	0	0	0	0	0	0	0
YDL114W-A	0	0	0	0	0	0	0	0	0	0	0	0	0	0	0	0	0	1	0	0	1	0	0	0	0	1	0	0	0	0	0	0	0	0	0	0	0	0	0	0	0	0	0	0	0	0	0	1	0
YDL115C	1	0	0	0	0	0	0	0	0	0	0	0	0	0	1	0	0	0	0	0	0	0	0	1	0	0	0	0	0	0	0	0	0	0	0	0	0	0	0	0	0	0	0	0	0	0	0	0	0
YDL116W	1	0	0	0	0	0	0	0	1	0	0	0	0	0	1	0	0	0	0	0	0	0	0	0	0	0	0	0	0	1	0	1	0	0	0	1	0	0	0	0	0	0	0	0	0	0	0	0	0
YDL117W	1	0	0	0	0	0	0	0	1	0	0	0	0	0	1	0	0	0	0	0	0	0	0	0	0	0	0	0	0	0	0	0	0	0	0	1	0	0	0	0	0	0	0	0	0	0	0	0	0
YDL119C	1	0	0	0	0	0	0	0	0	0	0	0	0	0	1	0	0	0	0	0	0	0	0	1	0	0	0	0	0	0	0	0	0	0	0	1	0	1	0	0	0	0	0	0	0	0	0	0	0
YDL120W	1	0	0	0	0	0	0	0	0	0	0	0	0	0	1	0	0	1	0	0	1	0	0	0	1	0	0	0	0	0	0	0	0	0	0	1	0	0	0	0	0	0	0	0	0	0	0	1	0
YDL121C	0	0	0	1	0	0	0	0	0	0	0	0	0	0	1	0	0	0	0	0	1	0	1	0	0	0	0	0	0	0	0	0	0	0	0	0	0	0	0	0	0	0	0	0	0	0	0	0	0
YDL122W	1	0	0	0	0	0	0	0	1	1	0	0	0	0	1	0	0	0	0	0	0	0	1	1	0	0	0	0	0	1	0	1	0	0	0	1	0	0	0	0	1	0	0	0	0	0	0	0	0
YDL123W	1	0	1	0	0	0	0	0	0	0	0	0	0	0	1	0	0	1	0	0	0	0	0	1	0	0	0	0	0	0	0	0	0	0	0	0	0	0	0	0	0	0	0	0	0	0	0	1	0
YDL124W	1	0	0	0	0	0	0	0	0	0	0	0	0	0	0	0	0	1	0	0	1	0	0	1	0	0	0	0	0	1	0	0	0	0	0	0	0	0	0	0	0	0	0	0	0	0	0	0	0
YDL125C	1	0	0	0	0	0	0	0	0	0	1	1	0	0	1	0	0	1	0	1	1	0	0	1	0	0	0	0	0	0	0	0	0	0	0	0	0	1	0	0	0	0	0	0	0	0	0	1	0
YDL126C	0	0	0	0	0	0	0	0	0	0	0	0	0	0	1	0	0	0	0	0	1	0	0	1	0	0	0	0	0	1	0	1	1	0	0	0	0	0	0	0	0	0	0	0	0	0	0	1	0
YDL127W	1	0	1	0	0	0	0	0	0	0	0	0	0	0	1	0	0	1	0	0	0	0	0	0	0	0	0	0	0	0	0	1	0	0	0	0	0	0	0	0	0	0	0	0	0	0	0	1	0
YDL128W	0	0	0	0	0	0	0	0	0	0	0	0	0	0	1	0	0	0	0	0	0	0	0	0	0	0	0	0	0	0	0	1	0	0	0	1	0	0	0	0	0	0	0	0	0	0	0	1	0
YDL129W	1	0	0	0	0	0	0	0	0	0	0	0	0	0	1	0	0	0	0	0	0	0	0	0	1	0	0	0	0	0	0	0	0	0	0	0	0	0	0	0	0	0	0	0	0	0	0	1	0
YDL130W	0	0	0	0	0	0	0	0	0	0	0	1	0	0	1	0	0	0	0	1	1	0	0	0	1	0	0	0	0	0	0	0	1	0	0	0	0	0	0	0	0	0	0	0	0	0	0	0	0
YDL130W-A	0	0	0	0	0	0	0	0	0	0	1	0	0	0	0	0	0	1	0	1	1	0	0	1	0	0	0	0	0	1	0	0	0	0	0	0	0	0	0	0	0	0	0	0	0	0	0	0	0
YDL131W	0	0	0	0	0	0	0	0	0	0	0	0	0	0	1	0	0	0	0	0	0	0	0	1	0	0	0	0	0	0	0	1	0	0	0	0	0	0	0	0	0	0	0	0	0	0	0	0	0
YDL132W	1	0	0	0	0	0	0	0	1	0	0	0	0	0	1	0	0	0	0	0	0	0	0	0	0	0	0	0	0	1	0	0	0	0	0	0	0	0	0	0	0	0	0	0	0	0	0	0	0
YDL133C-A	1	0	0	0	0	0	0	0	0	0	0	0	0	0	1	0	0	0	0	1	1	0	0	1	0	0	0	0	0	0	0	0	0	0	0	1	0	0	0	0	0	0	0	0	0	0	0	0	0
YDL133W	1	0	0	0	0	0	0	0	0	0	0	0	0	0	1	0	0	0	0	1	1	0	0	1	0	0	0	0	0	0	0	0	0	0	0	1	0	0	0	0	0	0	0	0	0	0	0	1	0
YDL134C	0	0	0	0	0	0	0	0	0	0	0	0	0	0	0	0	0	0	0	0	0	0	0	0	0	0	0	0	0	0	0	0	0	0	0	0	0	0	0	0	0	0	0	0	0	0	0	0	0
YDL135C	0	0	0	0	0	0	0	0	0	0	0	0	0	0	1	0	0	0	0	0	1	0	0	1	1	0	0	0	0	0	0	0	0	0	0	0	0	0	0	0	0	0	0	0	0	0	0	0	0
YDL136W	0	0	0	0	0	0	0	0	0	0	1	0	0	0	1	0	0	1	0	1	1	0	0	1	1	1	0	0	0	0	0	0	0	0	0	0	0	0	0	0	0	0	0	0	0	0	0	1	0
YDL137W	1	0	0	0	0	0	0	0	0	0	0	0	0	0	0	0	0	0	0	0	1	0	0	1	1	1	0	0	0	1	0	0	0	0	0	0	0	0	0	0	0	0	0	0	0	0	0	0	0
YDL138W	1	0	1	0	0	0	0	0	1	0	0	0	0	0	1	0	0	0	0	0	0	0	0	1	0	0	0	0	0	0	0	0	0	0	0	0	0	0	0	0	0	0	0	0	0	0	0	0	0
YDL139C	0	0	0	0	0	0	0	0	0	0	0	0	0	0	0	0	0	0	0	0	0	0	0	1	0	0	0	0	0	0	0	0	0	0	0	0	0	0	0	0	0	0	0	0	0	0	0	0	0
YDL140C	0	0	1	0	0	0	0	0	1	0	0	1	0	0	1	0	0	0	0	0	0	0	1	1	0	0	0	0	0	1	0	1	0	0	0	1	0	0	0	0	0	0	0	0	0	0	0	0	0
YDL141W	0	0	0	0	0	0	0	0	1	0	0	0	0	0	0	0	0	0	0	0	0	0	0	0	1	0	0	0	0	0	0	1	0	0	0	0	0	0	0	0	0	0	0	0	1	0	0	0	0
YDL142C	1	0	0	0	0	0	0	0	0	0	0	0	0	0	1	0	0	0	0	0	0	0	0	1	0	0	0	0	0	0	0	0	0	0	0	0	0	0	0	0	0	0	0	0	0	0	0	0	0
YDL143W	0	0	0	0	0	0	0	0	0	0	1	0	0	0	1	0	0	0	0	0	0	0	0	1	0	0	0	0	0	1	0	1	0	0	0	0	0	0	0	0	0	0	0	0	0	0	0	0	0
YDL144C	0	0	0	0	0	0	0	0	0	0	1	0	0	0	1	0	0	0	0	0	0	0	0	1	1	1	0	0	0	0	0	0	0	0	0	0	0	0	0	0	0	0	0	0	0	0	0	0	0
YDL145C	0	0	0	0	0	0	0	0	1	0	0	0	0	0	1	0	0	0	0	0	1	0	1	1	0	0	0	0	0	1	0	1	0	0	0	0	0	0	0	0	0	0	0	0	0	0	0	0	0
YDL146W	0	0	0	0	0	0	0	0	1	0	0	0	0	0	0	0	0	0	0	0	0	0	0	0	0	0	0	0	0	0	0	0	0	0	0	0	0	0	0	1	0	0	0	0	0	0	0	1	0
YDL147W	1	0	0	0	0	0	0	0	0	0	0	0	0	0	1	0	0	0	0	0	0	0	0	1	0	0	0	0	0	1	0	1	0	0	0	1	0	0	0	0	0	0	0	0	0	0	0	0	0
YDL148C	0	0	0	0	0	0	0	0	0	0	0	0	0	0	1	0	0	0	0	0	0	0	0	1	0	0	0	0	0	1	0	1	0	0	0	1	0	0	0	0	1	0	0	0	0	0	0	0	0
YDL149W	1	0	0	0	0	0	0	0	1	0	0	0	0	0	1	0	0	0	0	0	0	0	0	0	1	0	0	0	0	0	0	0	0	0	0	1	0	0	0	0	0	0	0	0	0	0	0	0	0
YDL150W	0	0	0	0	0	0	0	0	0	0	0	0	0	0	1	1	0	0	0	0	0	0	0	0	0	0	0	0	0	0	0	0	0	0	0	0	0	0	0	0	0	0	0	0	0	0	0	0	0
YDL153C	1	0	0	0	0	0	0	0	0	1	0	0	0	0	1	0	0	0	0	0	0	0	0	0	1	0	0	0	0	0	0	1	0	0	0	1	0	0	0	0	0	0	0	0	0	0	0	0	0
YDL154W	0	0	0	0	0	0	0	0	1	0	0	0	0	0	0	0	0	0	0	0	0	0	0	0	0	0	0	0	0	0	0	0	0	0	0	0	0	0	0	0	0	0	0	0	1	0	0	0	0
YDL155W	1	0	0	0	0	0	0	0	0	0	0	0	0	0	1	0	0	0	0	0	0	0	0	1	1	0	0	0	0	0	0	0	0	0	0	1	0	0	0	0	0	0	0	0	0	0	0	0	0
YDL156W	0	0	0	0	0	0	0	0	1	0	0	0	0	0	0	0	0	0	0	0	0	0	0	0	0	0	0	0	0	0	0	0	0	0	0	0	0	0	0	0	0	0	0	0	0	0	0	0	0
YDL157C	1	0	0	0	0	0	0	0	0	0	0	0	0	0	1	0	0	1	0	0	1	0	0	1	1	1	0	0	0	0	0	0	0	0	0	1	0	0	0	0	0	0	0	0	0	0	0	0	0
YDL159W	1	0	1	0	0	0	0	0	0	0	0	0	0	0	0	0	0	0	0	0	0	0	0	0	1	0	0	0	0	0	0	1	0	0	1	0	0	0	0	0	0	0	0	0	0	0	0	0	0
YDL159W-A	0	0	0	0	0	0	0	0	0	0	0	0	0	0	0	0	0	1	0	0	1	0	0	0	0	0	0	0	0	0	0	0	0	0	0	0	0	0	0	0	0	0	0	1	0	0	0	1	0
YDL160C	1	0	1	0	0	0	0	0	0	0	0	0	0	0	0	0	0	0	0	0	0	0	0	0	1	0	0	0	0	1	0	1	0	0	0	0	0	0	0	0	0	0	0	0	0	0	0	1	0
YDL160C-A	0	0	0	0	0	0	0	0	0	0	0	0	0	0	0	0	0	1	0	0	1	0	0	1	0	1	0	0	0	0	0	0	0	0	0	0	0	0	0	0	0	0	0	0	0	0	0	1	0
YDL161W	1	0	0	0	0	0	0	0	0	1	0	0	0	0	1	0	0	0	0	0	0	0	0	0	0	0	0	0	0	0	0	1	0	0	0	0	0	0	0	0	0	0	0	0	0	0	0	0	0
YDL164C	0	0	0	0	0	0	0	0	1	0	0	0	0	0	0	0	0	0	0	0	0	0	0	0	0	0	0	0	0	0	0	0	0	0	0	0	0	0	0	0	0	0	0	0	0	0	0	0	0
YDL165W	0	0	0	0	0	0	0	0	0	0	1	1	0	0	1	0	0	0	0	1	1	0	0	1	0	0	0	0	0	0	0	0	0	0	0	0	0	0	0	0	0	0	0	0	0	0	0	0	0
YDL166C	1	0	0	0	0	0	0	0	0	0	0	0	0	0	1	0	0	0	0	0	0	0	1	0	0	0	0	0	0	1	0	0	0	0	0	1	0	0	0	0	0	0	0	0	0	0	0	0	0
YDL167C	0	0	0	0	0	0	0	0	0	0	0	1	0	0	1	0	0	0	0	0	0	0	0	0	1	1	0	0	0	0	0	1	0	0	0	0	0	0	0	0	0	0	0	0	0	0	0	1	0
YDL168W	0	0	0	0	0	0	0	0	0	0	0	0	0	0	0	0	0	0	0	1	0	0	0	0	0	0	0	0	0	0	0	0	0	0	0	0	0	0	0	0	0	0	0	0	0	0	0	0	0
YDL169C	0	0	0	0	0	0	0	0	0	0	0	0	0	0	0	0	0	0	0	0	0	0	0	1	0	0	0	0	0	0	0	0	0	0	0	0	0	0	0	0	0	0	0	0	0	0	0	0	0
YDL170W	1	0	0	0	0	0	0	0	0	0	0	0	0	0	1	0	0	0	0	0	0	0	0	1	0	0	0	0	0	0	0	0	0	0	0	0	0	0	0	0	0	0	0	0	1	0	0	1	0
YDL171C	0	0	0	0	0	0	0	0	1	0	0	0	0	0	1	0	0	0	0	0	0	0	0	1	0	0	0	0	0	1	0	1	0	0	0	0	0	0	0	0	0	0	0	0	0	0	0	1	0
YDL173W	1	0	0	0	0	0	0	0	0	1	0	0	0	0	1	1	0	0	0	0	0	0	0	0	1	0	0	0	0	0	0	0	0	0	0	0	0	0	0	0	0	0	0	0	0	0	0	0	0
YDL174C	1	0	0	0	0	0	0	0	1	0	0	0	0	0	0	0	0	0	0	0	0	0	0	1	1	0	0	0	0	0	0	0	0	0	0	0	0	0	0	0	0	0	0	0	0	0	0	0	0
YDL175C	1	0	0	0	0	0	0	0	0	0	0	0	0	0	1	0	0	1	0	0	0	0	0	1	0	0	0	0	0	0	0	0	0	0	0	0	0	0	0	0	0	0	0	0	0	0	0	0	0
YDL176W	1	0	0	0	0	0	0	0	1	0	0	0	0	0	1	0	0	0	0	0	0	0	0	1	1	0	0	0	0	0	0	0	0	0	0	0	0	0	0	0	0	0	0	0	0	0	0	0	0
YDL177C	1	0	0	0	0	0	0	0	0	0	0	0	0	0	1	0	0	0	0	0	0	0	0	0	1	0	0	0	0	0	0	0	0	0	0	0	0	0	0	0	0	0	0	0	1	0	0	0	0
YDL178W	0	0	0	0	0	0	0	0	0	0	1	0	0	0	0	0	0	0	0	0	0	0	0	0	0	0	0	0	0	0	0	1	0	0	0	0	0	0	0	0	0	0	0	0	0	0	0	0	0
YDL179W	1	0	0	0	0	0	0	0	1	0	0	0	0	0	1	0	0	0	0	0	0	0	1	0	1	0	0	0	0	0	0	0	0	0	0	1	0	0	0	0	0	0	0	0	0	0	0	1	0
YDL180W	1	0	0	0	0	0	0	0	1	0	0	0	0	0	1	0	0	0	0	0	0	0	0	0	1	0	0	0	0	0	0	0	0	0	0	0	0	0	0	0	0	0	0	0	0	0	0	0	0
YDL181W	1	0	0	0	0	0	0	0	0	0	1	0	0	0	0	0	0	1	0	0	1	0	0	1	0	1	0	0	0	0	0	0	0	0	0	1	0	0	0	0	0	0	0	0	0	0	0	1	0
YDL182W	0	0	0	0	0	0	0	0	0	0	0	0	0	0	1	0	0	0	0	0	0	0	0	0	0	0	0	0	0	0	0	0	0	0	0	1	0	0	0	0	0	0	0	0	0	0	0	0	0
YDL183C	1	0	0	0	0	0	0	0	0	0	0	0	0	0	1	0	0	0	0	0	0	0	0	0	0	0	0	0	0	0	0	0	0	0	0	1	0	0	0	0	0	0	0	0	0	0	0	0	0
YDL184C	1	0	0	0	0	0	0	0	0	0	0	0	0	0	0	0	0	1	0	1	1	0	1	0	1	1	0	0	0	0	0	0	1	0	0	1	0	0	0	0	0	0	0	0	0	0	0	0	0
YDL185W	0	0	0	0	0	0	0	0	0	0	0	0	0	0	1	0	0	0	0	0	0	0	0	1	0	0	0	0	0	1	0	1	0	0	0	1	0	0	0	0	0	0	0	0	0	0	0	0	0
YDL188C	0	0	0	0	0	0	0	0	0	0	0	0	0	0	0	0	0	1	0	0	0	0	0	1	0	0	0	0	0	0	0	0	0	0	0	0	0	0	0	0	0	0	0	0	0	0	0	1	0
YDL189W	1	0	1	0	0	0	0	0	0	0	1	0	0	0	1	1	0	1	0	1	0	0	1	0	1	0	0	0	0	0	0	0	0	0	0	0	0	0	0	0	0	0	0	0	0	0	0	0	0
YDL190C	0	0	0	0	0	0	0	0	1	0	0	0	0	0	1	0	0	0	0	0	1	0	0	0	0	0	0	0	0	0	0	0	0	0	0	0	0	0	0	0	0	0	0	0	0	0	0	0	0
YDL191W	0	0	0	0	0	0	0	0	0	0	1	0	0	0	1	0	0	1	0	1	1	0	0	1	0	1	0	0	0	0	0	0	0	0	0	1	0	0	1	0	0	0	0	0	0	0	0	0	0
YDL192W	1	0	0	0	0	0	0	0	0	0	1	0	0	0	1	0	0	0	0	1	1	0	0	1	0	1	0	0	0	1	0	0	1	0	0	1	0	0	0	0	0	0	0	0	0	0	0	0	0
YDL193W	0	0	0	0	0	0	0	0	0	0	1	0	0	0	0	0	0	0	0	0	1	0	0	0	0	0	0	0	0	0	0	0	0	0	0	0	0	0	0	0	0	0	0	0	0	0	0	0	0
YDL194W	0	0	0	0	0	0	0	0	1	0	0	0	0	0	0	0	0	0	0	0	0	0	0	1	0	0	0	0	0	0	0	0	0	0	0	0	0	0	0	0	0	0	0	0	0	0	0	0	0
YDL195W	0	0	1	0	0	0	0	0	1	0	0	0	0	0	1	0	0	0	0	0	0	0	0	1	0	0	0	0	0	1	0	1	0	0	0	1	0	0	0	0	0	0	0	0	0	0	0	0	0
YDL197C	1	0	1	0	0	0	0	0	0	0	0	0	0	0	1	0	0	0	0	0	0	0	0	0	1	0	0	0	0	0	0	0	0	0	0	0	0	0	0	0	0	0	0	0	1	0	0	0	0
YDL198C	0	0	0	0	0	0	0	0	0	0	0	0	0	0	1	0	0	0	0	0	0	0	0	0	1	0	0	0	0	0	0	0	0	0	0	1	0	0	0	0	0	0	0	0	0	0	0	0	0
YDL199C	1	0	1	0	0	0	0	0	1	0	0	0	0	0	0	0	0	0	0	0	0	0	0	1	0	0	0	0	0	0	0	1	0	0	0	0	0	0	0	0	0	0	0	0	1	0	0	0	0
YDL200C	0	0	0	0	0	0	0	0	0	0	0	0	0	0	0	0	0	0	0	0	0	0	0	1	0	0	0	0	0	0	0	0	0	0	0	0	0	0	0	0	0	0	0	0	0	0	0	0	0
YDL201W	0	0	0	0	0	0	0	0	0	0	0	0	0	0	1	0	0	0	0	0	1	0	1	1	1	0	0	0	0	0	0	0	0	0	0	0	0	0	0	0	0	0	0	0	0	0	0	0	0
YDL202W	1	0	0	0	0	0	0	0	0	0	1	1	0	0	1	0	0	0	0	0	1	0	0	1	0	0	0	0	0	0	0	0	0	0	0	1	0	0	0	0	0	0	0	0	0	0	0	0	0
YDL203C	1	0	0	0	0	0	0	0	1	0	0	0	0	0	1	0	0	0	0	0	0	0	0	1	1	0	0	0	0	0	0	0	0	0	0	0	0	0	0	0	0	0	0	0	0	0	0	0	0
YDL204W	1	0	0	0	0	0	0	0	1	0	0	0	0	0	0	0	0	0	0	0	0	0	0	1	0	0	0	0	0	0	0	0	0	0	0	0	0	0	0	0	0	0	0	0	0	0	0	1	0
YDL205C	0	0	0	0	0	0	0	0	0	0	1	0	0	0	0	0	0	0	0	0	0	0	0	1	0	0	0	0	0	1	0	0	0	0	0	1	0	1	0	0	0	0	0	0	0	0	0	1	0
YDL206W	1	0	1	0	0	0	0	0	1	0	0	0	0	0	1	0	0	0	0	0	0	0	0	0	1	0	0	0	0	0	0	0	0	0	0	1	0	0	0	0	0	0	0	0	0	0	0	1	0
YDL207W	1	0	0	0	0	0	0	0	0	0	0	0	0	0	1	0	0	0	0	0	0	0	0	0	0	0	0	0	0	0	0	0	0	0	0	0	0	0	0	0	0	0	0	0	0	0	0	0	0
YDL208W	0	0	0	0	0	0	0	0	0	0	0	1	0	0	1	0	0	1	0	0	1	0	1	1	1	1	0	0	0	1	0	0	1	0	0	1	0	0	0	0	0	0	0	0	0	0	0	0	0
YDL209C	1	0	0	0	0	0	0	0	0	1	0	0	0	0	1	0	0	0	0	0	0	0	0	0	0	0	0	0	0	0	0	0	0	0	0	0	0	0	0	0	0	0	0	0	0	0	0	0	1
YDL210W	0	0	1	0	0	0	0	0	0	0	0	0	0	0	0	0	0	0	0	0	0	0	0	1	0	0	0	0	0	0	0	0	0	0	0	0	0	0	0	0	0	0	0	0	1	0	0	0	0
YDL211C	1	0	1	0	0	0	0	0	0	0	0	0	0	0	1	0	0	0	0	0	0	0	0	0	1	0	0	0	0	0	0	0	0	0	0	1	0	0	0	0	0	0	0	0	1	0	0	0	0
YDL212W	0	0	0	0	0	0	0	0	0	0	1	0	0	0	0	0	0	1	0	1	1	0	0	1	0	1	0	0	0	0	0	0	0	0	0	0	0	0	0	0	0	0	0	0	0	0	0	1	0
YDL213C	1	0	0	0	0	0	0	0	0	1	0	0	0	0	1	0	0	0	0	1	1	0	1	1	1	0	0	0	0	0	0	0	0	0	0	1	0	0	0	0	0	0	0	0	0	0	0	0	0
YDL214C	0	0	0	0	0	0	0	0	1	0	0	0	0	0	0	0	0	0	0	0	0	0	0	0	0	0	0	0	0	0	0	0	0	0	0	0	0	0	0	0	0	0	0	0	0	0	0	0	0
YDL215C	1	0	0	0	0	0	0	0	1	0	0	0	0	0	1	0	0	0	0	0	0	0	0	0	0	0	0	0	0	0	0	0	0	0	0	0	0	0	0	0	0	0	0	0	0	0	0	0	0
YDL216C	1	0	0	0	0	0	0	0	1	0	0	0	0	0	1	0	0	1	0	0	0	0	0	1	1	0	0	0	0	0	0	0	0	0	0	1	0	0	0	0	0	0	0	0	0	0	0	0	0
YDL217C	1	0	0	0	0	0	0	0	0	0	0	0	0	0	1	0	0	0	0	0	0	0	0	0	0	0	0	0	0	0	0	0	0	0	0	1	0	0	0	0	0	0	0	0	0	0	0	0	0
YDL218W	0	0	0	0	0	0	0	0	0	0	0	0	0	0	1	0	0	0	0	0	0	0	0	0	0	0	0	0	0	0	0	0	0	0	0	0	0	0	0	0	0	0	0	0	0	0	0	0	0
YDL219W	1	0	0	0	0	0	0	0	0	0	0	0	0	0	1	0	0	0	0	0	1	0	0	1	0	0	0	0	0	0	0	0	0	0	0	0	0	0	0	0	0	0	0	0	0	0	0	0	0
YDL220C	1	0	0	0	0	0	0	0	1	0	0	0	0	0	1	0	0	0	0	0	0	0	0	0	0	0	0	0	0	0	0	0	0	0	0	0	0	0	0	0	0	0	0	0	0	0	0	0	0
YDL222C	0	0	0	0	0	0	0	0	1	0	0	0	0	0	0	0	0	0	0	0	0	0	0	1	0	0	0	0	0	0	0	0	0	0	0	0	0	0	0	0	0	0	0	0	0	0	0	0	0
YDL223C	0	0	1	0	0	0	0	0	1	0	0	0	0	0	0	0	0	0	0	0	0	0	0	0	0	0	0	0	0	0	0	0	0	0	0	0	0	0	0	0	0	0	0	0	0	0	0	0	0
YDL224C	1	0	1	0	0	0	0	0	1	0	0	0	0	0	1	0	0	0	0	0	0	0	0	0	0	0	0	0	0	0	0	0	0	0	0	0	0	0	0	0	0	0	0	0	0	0	0	1	0
YDL225W	1	0	0	0	0	0	0	0	0	0	0	0	0	0	1	0	0	0	0	0	0	0	0	0	0	0	0	0	0	1	0	1	0	0	0	0	0	0	0	0	0	0	0	0	0	0	0	0	0
YDL226C	0	0	0	0	0	0	0	0	0	0	0	0	0	0	1	0	0	0	0	0	0	0	0	0	1	0	0	0	0	0	0	0	0	0	0	0	0	0	0	0	0	0	0	0	1	0	0	0	0
YDL227C	1	0	0	0	0	0	0	0	1	0	0	0	0	0	1	0	0	0	0	0	0	0	1	0	1	0	0	0	0	0	0	1	0	0	0	1	0	0	0	0	0	0	0	0	0	0	0	0	0
YDL229W	0	0	0	0	0	0	0	0	0	0	1	1	0	0	1	0	0	0	0	1	0	0	0	0	1	0	0	0	0	1	0	1	0	0	0	1	0	0	0	0	0	0	0	0	0	0	0	0	0
YDL230W	1	0	0	0	0	0	0	0	0	0	0	0	0	0	1	0	0	0	0	0	0	0	0	0	0	0	0	0	0	0	0	0	0	0	0	0	0	0	0	0	0	0	0	0	0	0	0	0	0
YDL231C	1	0	1	0	0	0	0	0	1	0	0	0	0	0	0	1	0	0	0	0	1	0	0	0	0	0	0	0	0	0	0	0	0	0	0	0	0	0	0	0	0	0	0	0	0	0	0	1	0
YDL232W	1	0	1	0	0	0	0	0	0	0	0	0	0	0	1	0	0	1	0	0	1	0	0	1	1	0	0	0	0	0	0	0	0	0	0	1	0	0	0	0	0	0	0	0	0	0	0	1	0
YDL233W	1	0	1	0	0	0	0	0	1	0	0	0	0	0	1	1	0	1	0	0	0	0	0	1	0	0	0	0	0	0	0	0	0	0	0	0	0	0	0	0	0	0	0	0	0	0	0	0	0
YDL234C	1	0	0	0	0	0	0	0	1	0	0	0	0	0	1	0	0	0	0	0	0	0	0	0	0	0	0	0	0	1	0	0	0	0	0	0	0	0	0	0	0	0	0	0	0	0	0	0	0
YDL235C	1	0	1	0	0	0	0	0	0	0	0	0	0	0	1	0	0	0	0	0	1	0	0	1	0	0	0	0	0	0	0	0	0	0	0	0	0	0	0	0	0	0	0	0	0	0	0	0	0
YDL236W	0	0	0	0	0	0	0	0	0	1	0	0	0	0	0	0	0	0	0	0	0	0	0	1	0	1	0	0	0	0	0	1	0	0	0	0	0	0	0	0	0	0	0	0	0	0	0	0	0
YDL237W	0	0	0	0	0	0	0	0	0	0	1	0	0	0	0	0	0	0	0	0	0	0	0	1	0	0	0	0	0	1	0	1	0	0	0	0	0	0	0	0	0	0	0	0	0	0	0	1	0
YDL238C	1	0	0	0	0	0	0	0	1	0	0	0	0	0	0	0	0	0	0	0	0	0	0	1	0	0	0	0	0	0	0	0	0	0	0	0	0	0	0	0	0	0	0	0	0	0	0	0	0
YDL239C	0	0	0	0	0	0	0	0	1	0	0	0	0	0	0	0	0	0	0	0	0	0	0	1	0	0	0	0	0	0	0	0	0	0	0	0	0	0	0	0	0	0	0	0	1	0	0	0	0
YDL240C-A	0	0	0	0	0	0	0	0	0	0	0	0	0	0	0	0	0	1	0	0	1	0	0	0	0	1	0	0	0	0	0	0	0	0	0	0	0	0	0	0	0	0	0	0	0	0	0	0	0
YDL240W	1	0	0	0	0	0	0	0	0	0	0	0	0	0	1	0	0	0	0	0	0	0	0	0	1	0	0	0	0	0	0	0	0	0	0	0	0	0	0	0	0	0	0	0	0	0	0	0	0
YDL241W	1	0	0	0	0	0	0	0	0	0	0	0	0	0	0	0	0	0	0	0	1	0	0	1	1	1	0	0	0	0	0	0	0	0	0	1	0	0	0	0	0	0	0	0	0	0	0	1	0
YDL243C	0	0	0	0	0	0	0	0	1	0	0	0	0	0	0	0	0	0	0	0	0	0	0	1	0	0	0	0	0	0	0	0	0	0	0	0	0	0	0	0	0	0	0	0	1	0	0	0	0
YDL245C	0	0	1	0	0	0	0	0	0	0	0	0	0	0	0	0	0	0	0	0	0	0	0	0	0	0	0	0	0	0	0	0	0	0	0	0	0	0	0	0	0	0	0	0	0	0	0	0	0
YDL247W	0	0	1	0	0	0	0	0	1	0	0	0	0	0	0	0	0	0	0	0	0	0	0	0	0	0	0	0	0	0	0	0	0	0	0	0	0	0	0	0	0	0	0	0	0	0	0	0	0
YDL247W-A	0	0	0	0	0	0	0	0	0	0	0	0	0	0	0	0	0	1	0	0	1	0	0	0	0	0	0	0	0	0	0	0	0	0	0	0	0	0	0	0	0	0	0	0	0	0	0	1	0
YDL248W	0	0	0	0	0	0	0	0	0	0	0	0	0	0	0	0	0	0	0	0	0	0	0	0	0	0	0	0	0	0	0	1	0	0	0	0	0	0	0	0	0	0	0	0	1	0	0	1	0
YDR001C	1	0	0	0	0	0	0	0	1	0	0	0	0	0	0	0	0	0	0	0	0	0	0	1	0	0	0	0	0	0	0	0	0	0	0	0	0	0	0	0	0	0	0	0	0	0	0	0	0
YDR002W	0	0	0	0	0	0	0	0	0	0	0	0	0	0	1	0	0	0	0	0	1	0	0	1	0	0	0	0	0	1	0	0	0	0	0	1	0	0	0	0	0	0	0	0	0	0	0	0	0
YDR003W	1	0	0	0	0	0	0	0	0	0	0	0	0	0	0	0	0	1	0	0	1	0	0	1	1	1	0	0	0	0	0	0	0	0	0	0	0	0	0	0	0	0	0	0	0	0	1	1	0
YDR003W-A	0	0	0	0	0	0	0	0	0	0	1	0	0	0	0	0	0	1	0	0	1	0	0	1	1	0	0	0	0	0	0	0	0	0	0	0	0	0	0	0	0	0	0	0	0	0	0	0	0
YDR004W	1	0	0	0	0	0	0	0	1	0	0	0	0	0	1	0	0	0	0	0	0	0	0	1	1	0	1	0	0	0	0	0	0	0	0	0	0	0	0	0	0	0	0	0	0	0	0	0	0
YDR005C	1	0	0	0	0	0	0	0	1	0	0	0	0	0	0	0	0	0	0	0	0	0	0	1	0	0	0	0	0	0	0	0	0	0	0	0	0	0	0	0	0	0	0	0	0	0	0	1	0
YDR006C	1	0	1	0	0	0	0	0	1	0	0	0	0	0	1	0	0	0	0	0	0	0	0	0	0	0	0	0	0	0	0	0	0	0	0	1	0	0	0	0	0	0	0	0	0	0	0	1	0
YDR007W	1	0	0	0	0	0	0	0	0	0	0	0	0	0	0	0	0	0	0	0	1	0	1	0	1	1	0	0	0	0	0	0	0	0	0	0	0	0	0	0	0	0	0	0	1	0	0	0	0
YDR009W	0	0	0	0	0	0	0	0	1	0	0	0	0	0	0	0	0	0	0	0	0	0	0	0	0	0	0	0	0	0	0	0	0	0	0	0	0	0	0	0	0	0	0	0	0	0	0	0	0
YDR011W	1	0	0	0	0	0	0	0	1	0	0	1	0	0	1	0	0	0	0	0	0	0	0	1	0	0	0	0	0	0	0	1	0	0	0	0	0	0	0	0	1	0	0	0	0	0	0	1	0
YDR012W	0	0	0	0	0	0	0	0	0	0	1	0	0	0	1	0	0	0	0	1	1	0	0	0	0	0	0	0	0	0	0	0	0	0	0	1	0	0	0	0	0	0	0	0	0	0	0	0	0
YDR013W	1	0	0	0	0	0	0	0	0	0	0	0	0	0	1	0	0	0	0	0	1	0	0	0	0	0	0	0	0	0	0	0	0	0	0	0	0	0	0	0	0	0	0	0	1	0	0	0	0
YDR014W	1	0	0	0	0	0	0	0	1	0	0	0	0	0	1	0	0	0	0	0	0	0	0	1	0	0	0	0	0	0	0	0	0	0	0	0	0	0	0	0	0	0	0	0	0	0	0	0	0
YDR016C	1	0	0	0	0	0	0	0	0	0	0	0	0	0	1	0	0	1	0	1	1	0	1	1	1	1	0	0	0	0	0	0	0	0	0	0	0	0	0	0	0	0	0	0	0	0	0	0	0
YDR017C	1	0	0	0	0	0	0	0	1	0	0	0	0	0	1	0	0	0	0	0	0	0	0	0	0	0	0	0	0	0	0	0	0	0	0	1	0	0	0	0	0	0	0	0	0	0	0	0	0
YDR018C	0	0	0	0	0	0	0	0	0	0	0	0	0	0	0	0	0	0	0	0	0	0	0	1	0	0	0	0	0	0	0	0	0	0	0	0	0	0	0	0	0	0	0	0	0	0	0	0	0
YDR019C	0	0	0	0	0	0	0	0	0	0	0	0	0	0	1	0	0	0	0	0	0	0	0	0	0	0	0	0	0	0	0	0	0	0	0	1	0	0	0	0	0	0	0	0	0	0	0	1	0
YDR020C	1	0	0	0	0	0	0	0	0	0	0	0	0	0	1	0	0	0	0	0	0	0	0	0	1	0	0	0	0	0	0	0	0	0	0	1	0	0	0	0	0	0	0	0	0	0	0	1	0
YDR021W	1	0	0	0	0	0	0	0	0	0	0	0	0	0	1	0	0	0	0	0	0	0	0	0	1	0	0	0	0	0	0	0	0	0	0	0	0	0	0	0	0	0	0	0	0	0	0	0	0
YDR022C	1	0	0	0	0	0	0	0	0	0	0	0	0	0	1	0	0	0	0	0	1	0	0	1	0	0	0	0	0	0	0	0	0	0	0	0	0	0	0	0	0	0	0	0	1	0	0	0	0
YDR023W	0	0	0	0	0	0	0	0	0	0	0	0	0	0	1	0	0	0	0	0	0	0	0	1	0	0	0	0	0	1	0	1	0	0	0	1	0	0	0	0	0	0	0	0	0	0	0	0	0
YDR025W	0	0	1	0	0	0	0	0	0	0	1	0	0	0	1	0	0	1	0	1	1	0	0	0	1	1	0	0	0	1	0	0	1	0	0	0	0	0	0	0	0	0	0	0	0	0	0	0	0
YDR026C	1	0	0	0	0	0	0	0	0	0	0	0	0	0	1	0	0	0	0	0	0	0	0	0	1	0	0	0	0	0	0	0	0	0	0	0	0	0	0	0	0	0	0	0	0	0	0	0	0
YDR027C	1	0	0	0	0	0	0	0	1	0	0	0	0	0	0	0	0	0	0	0	0	0	0	0	0	0	0	0	0	0	0	0	0	0	0	0	0	0	0	0	0	0	0	0	0	0	0	0	0
YDR028C	1	0	0	0	0	0	0	0	1	0	0	0	0	0	1	0	0	0	0	0	0	0	0	0	0	0	0	0	0	1	0	0	0	0	0	1	0	0	0	0	0	0	0	0	1	0	0	0	0
YDR030C	1	0	0	0	0	0	0	0	1	0	0	0	0	0	0	0	0	0	0	0	0	0	0	1	0	0	0	0	0	0	0	0	0	0	0	0	0	0	0	0	0	0	0	0	0	0	0	0	0
YDR031W	1	0	0	0	0	0	0	0	0	0	1	0	0	0	1	0	0	1	0	0	1	0	0	1	0	0	0	0	0	0	0	0	0	0	0	1	0	0	0	0	0	0	0	0	0	0	0	0	0
YDR032C	0	0	0	0	0	0	0	0	0	0	0	0	0	0	1	0	0	0	0	0	1	0	0	1	0	1	0	0	0	0	0	0	0	0	0	0	0	0	0	0	0	0	0	0	0	0	0	0	0
YDR033W	1	0	1	0	0	0	0	0	0	0	0	0	0	0	1	0	0	0	0	0	0	0	0	1	1	0	0	0	0	1	0	0	1	0	0	1	0	0	0	0	0	0	0	0	0	0	0	1	0
YDR034C	1	0	0	0	0	0	0	0	1	0	0	0	0	0	0	0	0	0	0	0	0	0	0	1	1	0	0	0	0	0	0	0	0	0	0	0	0	0	0	0	0	0	0	0	0	0	0	0	0
YDR034C-A	0	0	0	0	0	0	0	0	0	0	0	0	0	0	0	0	0	0	0	0	0	0	0	1	0	0	0	0	0	0	0	0	0	0	0	0	0	0	0	0	0	0	0	0	0	0	0	0	0
YDR034C-C	0	0	0	0	0	0	0	0	0	0	0	0	0	0	0	0	0	0	0	0	0	0	0	1	0	0	0	0	0	0	0	0	0	0	0	0	0	0	0	0	0	0	0	0	0	0	0	0	0
YDR034W-B	0	0	0	0	0	0	0	0	0	0	0	0	0	0	0	0	0	0	0	0	0	0	0	1	0	0	0	0	0	0	0	0	0	0	0	0	0	0	0	0	0	0	0	0	0	0	0	0	0
YDR035W	0	0	0	0	0	0	0	0	0	1	0	0	0	0	1	0	0	0	0	0	0	0	0	1	1	0	0	0	0	1	0	0	0	0	0	0	0	0	0	0	0	0	0	0	0	0	1	0	0
YDR036C	0	0	0	0	0	0	0	0	0	0	0	0	0	0	1	0	0	0	0	0	0	0	0	0	0	0	0	0	0	0	0	1	0	0	0	1	0	0	0	1	1	0	0	0	0	0	0	0	0
YDR037W	0	0	0	0	0	0	0	0	0	0	0	1	0	0	1	0	0	0	0	0	0	0	1	0	0	0	0	0	0	1	0	1	1	0	0	0	0	0	0	0	0	0	0	0	0	0	0	0	0
YDR038C	0	0	1	0	0	0	0	0	1	0	0	0	0	0	1	0	0	0	0	0	0	0	0	0	0	0	0	0	0	0	0	1	0	0	0	0	0	0	0	0	0	0	0	0	0	0	0	1	0
YDR039C	0	0	1	0	0	0	0	0	1	0	0	0	0	0	1	0	0	0	0	0	1	0	0	0	0	0	0	0	0	0	0	1	0	0	0	0	0	0	0	0	0	0	0	0	0	0	0	1	0
YDR040C	0	0	0	0	0	0	0	0	1	0	0	0	0	0	1	0	0	0	0	0	1	0	0	0	0	0	0	0	0	0	0	1	0	0	0	0	0	0	0	0	0	0	0	0	0	0	0	1	0
YDR041W	1	0	0	0	0	0	0	0	0	0	1	0	0	0	1	0	0	1	0	0	1	0	0	1	1	0	0	0	0	0	0	0	0	0	0	1	0	0	0	0	0	0	0	0	0	0	0	0	0
YDR042C	1	0	0	0	0	0	0	0	0	0	0	0	0	0	0	0	0	0	0	0	0	0	0	0	0	0	0	0	0	0	0	0	0	0	0	1	0	0	0	0	0	0	0	0	0	0	0	0	0
YDR043C	1	0	1	0	0	0	0	0	0	0	0	0	0	0	0	0	0	1	0	0	0	0	0	0	0	0	0	0	0	0	0	0	0	0	0	0	0	0	0	0	0	0	0	0	0	0	0	1	0
YDR044W	0	0	0	0	0	0	0	0	0	0	0	0	0	0	1	0	0	0	0	0	0	0	0	0	0	0	0	0	0	1	0	0	0	0	0	0	0	0	0	0	0	0	0	0	0	0	0	1	0
YDR045C	1	0	0	0	0	0	0	0	0	0	0	0	0	0	1	0	0	1	0	0	1	0	0	1	1	1	0	0	0	0	0	0	0	0	0	0	0	0	0	0	0	0	0	0	0	0	0	0	0
YDR046C	1	0	0	0	0	0	0	0	1	0	0	0	0	0	1	0	0	0	0	0	0	0	0	1	0	0	0	0	0	0	0	0	0	0	0	0	0	0	0	0	0	0	0	0	0	0	0	0	0
YDR047W	1	0	0	0	0	0	0	0	0	0	0	0	0	0	1	0	0	0	0	0	0	0	0	0	0	0	0	0	0	0	0	0	0	0	0	1	0	0	0	0	0	0	0	0	0	0	0	0	0
YDR049W	1	0	0	0	0	0	0	0	0	0	0	0	0	0	1	0	0	0	0	0	0	0	0	1	0	0	0	0	0	0	0	0	0	0	0	1	0	0	0	0	0	0	0	0	0	0	0	0	0
YDR050C	0	0	0	0	0	0	0	0	0	0	0	1	0	0	1	0	0	0	0	0	1	0	0	1	1	0	0	0	0	1	0	0	1	0	0	0	0	0	0	0	0	0	1	0	0	0	0	0	0
YDR051C	1	0	0	0	0	0	0	0	0	0	0	0	0	0	1	0	0	0	0	0	1	0	0	1	0	1	0	0	0	0	0	0	0	0	0	1	0	0	0	0	0	0	0	0	0	0	0	0	0
YDR052C	1	0	1	0	0	0	0	0	0	0	0	0	0	0	1	0	0	0	0	0	0	0	0	1	1	0	0	0	0	0	0	1	0	0	0	1	0	0	0	0	0	0	0	0	0	0	0	0	0
YDR054C	1	0	0	0	0	0	0	0	0	0	0	0	0	0	1	0	0	0	0	0	0	0	1	1	0	0	0	0	0	1	0	0	0	0	0	0	0	0	0	0	0	0	0	0	1	0	0	0	0
YDR055W	1	0	1	0	0	0	0	0	0	0	0	0	0	0	1	0	0	0	0	0	0	0	0	1	0	0	0	0	0	0	0	1	0	0	0	1	0	0	0	0	0	0	0	0	0	0	1	0	0
YDR056C	0	0	0	0	0	0	0	0	0	1	0	0	0	0	1	0	0	1	0	0	1	0	0	1	0	0	0	0	0	0	0	0	0	0	0	0	0	0	0	0	0	0	0	0	0	0	0	0	0
YDR057W	0	0	0	0	0	0	0	0	1	0	0	0	0	0	0	0	0	0	0	0	0	0	0	0	0	0	0	0	0	0	0	1	0	0	0	0	0	0	0	0	0	0	0	0	0	0	0	1	0
YDR058C	0	0	0	0	0	0	0	0	0	0	0	0	0	0	0	0	0	0	0	0	0	0	0	1	0	0	0	0	0	0	0	1	0	0	0	0	0	0	0	0	0	0	0	0	1	0	0	0	0
YDR059C	0	0	0	0	0	0	0	0	0	0	1	0	0	0	0	0	0	0	0	0	0	0	0	0	0	0	0	0	0	0	0	0	0	0	0	0	0	0	0	0	0	0	0	0	0	0	0	1	0
YDR060W	0	0	0	0	0	0	0	0	1	0	0	0	0	0	1	0	0	0	0	0	0	0	1	0	1	0	0	0	0	1	0	1	0	0	1	1	0	0	0	0	0	0	0	0	0	0	0	0	0
YDR061W	1	0	0	0	0	0	0	0	1	0	1	0	0	0	1	0	0	0	0	0	0	0	0	1	0	0	0	0	0	0	0	0	0	0	0	1	0	0	0	0	0	0	0	0	0	0	0	0	0
YDR062W	0	0	0	0	0	0	0	0	1	0	0	0	0	0	0	0	0	0	0	0	0	0	0	1	0	0	0	0	0	0	0	1	0	0	0	1	0	0	0	0	1	0	0	0	0	0	0	0	0
YDR063W	1	0	0	0	0	0	0	0	0	0	0	1	0	0	1	0	0	1	0	0	1	0	0	1	1	0	0	0	0	0	0	0	0	0	0	0	0	0	0	0	0	0	0	0	0	0	0	1	0
YDR064W	0	0	0	0	0	0	0	0	0	0	1	1	0	0	1	0	0	0	0	0	1	0	1	1	1	0	0	0	0	0	0	0	0	0	0	1	0	0	0	0	0	0	1	0	0	0	0	1	0
YDR065W	1	0	0	0	0	0	0	0	1	0	0	0	0	0	0	0	0	0	0	0	0	0	0	1	1	0	0	0	0	0	0	0	0	0	0	1	0	0	0	0	0	0	0	0	0	0	0	0	0
YDR066C	0	0	0	0	0	0	0	0	0	0	0	0	0	0	0	0	0	0	0	0	0	0	0	0	0	0	0	0	0	0	0	0	0	0	0	1	0	0	0	0	0	0	0	0	0	0	0	0	0
YDR067C	0	0	0	0	0	0	0	0	0	0	0	0	0	0	1	0	0	1	0	0	1	0	0	1	0	0	0	0	0	0	0	0	0	0	0	0	0	0	0	1	0	0	0	0	0	0	0	0	0
YDR068W	0	0	1	0	0	0	0	0	0	1	0	0	0	0	1	0	0	0	0	0	0	0	0	1	0	0	0	0	0	1	0	1	0	0	0	1	0	0	0	0	0	0	0	0	0	0	0	0	0
YDR069C	1	0	1	0	0	0	0	0	1	0	0	0	0	0	1	0	0	0	0	0	0	0	0	0	0	0	0	0	0	0	0	0	0	0	0	0	0	0	0	0	0	0	0	0	0	0	0	0	0
YDR070C	1	0	0	0	0	0	0	0	0	0	0	0	0	0	0	0	0	0	0	0	1	0	0	1	0	0	0	0	0	0	0	0	0	0	0	1	0	0	0	0	0	0	0	0	0	0	0	1	0
YDR071C	0	0	0	0	0	0	0	0	0	0	1	0	0	0	1	0	0	1	0	1	1	0	1	1	0	0	0	0	0	1	0	0	0	0	0	0	0	0	0	0	0	0	0	0	0	0	0	0	0
YDR072C	1	0	1	0	0	0	0	0	1	0	0	0	0	0	1	0	0	0	0	0	0	0	0	1	0	0	0	0	0	0	0	0	0	0	0	1	0	0	0	0	0	0	0	0	0	0	0	1	0
YDR073W	1	0	1	0	0	0	0	0	0	0	0	0	0	0	1	0	0	1	0	0	0	0	0	1	1	0	0	0	0	0	0	0	0	0	0	1	0	0	0	0	0	0	0	0	0	0	0	1	0
YDR074W	1	0	0	0	0	0	0	0	1	0	0	1	0	0	1	0	0	0	0	0	0	0	0	1	0	0	0	0	0	1	0	0	0	0	0	0	0	0	0	0	0	0	0	0	0	0	0	0	0
YDR075W	1	0	0	0	0	0	0	0	1	0	0	0	0	0	1	0	0	0	0	0	0	0	0	0	1	0	0	0	0	0	0	0	0	0	0	0	0	0	0	0	0	0	0	0	0	0	0	1	0
YDR076W	1	0	1	0	0	0	0	0	0	0	0	0	0	0	1	0	0	0	0	0	0	0	0	0	0	0	0	0	0	0	0	0	0	0	0	0	0	0	0	0	0	0	0	0	0	0	0	0	0
YDR077W	1	0	1	0	0	0	0	0	0	0	0	1	0	0	1	0	0	0	0	0	0	0	0	0	0	0	0	0	0	1	0	1	1	0	0	1	0	0	0	0	0	0	0	1	0	0	0	1	0
YDR078C	1	0	1	0	0	0	0	0	0	0	0	0	0	0	1	0	0	0	0	0	1	0	0	1	1	0	0	0	0	0	0	0	0	0	0	0	0	0	0	0	0	0	0	0	1	0	0	0	0
YDR079C-A	0	0	0	0	0	0	0	0	0	0	0	0	0	0	0	0	0	1	0	0	1	0	0	1	0	1	0	0	0	0	0	0	0	0	0	0	0	0	0	0	0	0	0	0	0	0	0	0	0
YDR079W	0	0	0	0	0	0	0	0	0	0	1	0	0	0	1	0	0	1	0	0	1	0	0	1	1	0	0	0	0	0	0	0	0	0	0	1	0	0	0	0	0	0	0	0	0	0	0	1	0
YDR080W	1	0	1	0	0	0	0	0	1	0	0	0	0	0	0	0	0	0	0	0	0	0	0	0	0	0	0	0	0	0	0	0	0	0	0	1	0	0	0	0	0	0	0	0	0	0	0	0	0
YDR081C	1	0	1	0	0	0	0	0	1	0	0	0	0	0	0	0	0	0	0	0	0	0	0	1	0	0	0	0	0	0	0	1	0	0	0	1	0	0	0	0	0	0	0	0	0	0	0	0	0
YDR082W	1	0	0	0	0	0	0	0	1	0	0	0	0	0	1	0	0	0	0	0	0	0	0	0	0	0	0	0	0	1	0	0	0	0	0	0	0	0	0	0	0	0	0	0	1	0	0	0	0
YDR083W	0	0	0	0	0	0	0	0	0	0	0	0	0	0	1	0	0	0	0	0	1	0	1	0	1	0	0	0	0	1	0	1	0	0	0	1	0	0	0	0	0	0	0	0	0	0	0	0	0
YDR084C	0	0	0	0	0	0	0	0	0	0	0	0	0	0	1	1	0	1	0	0	1	0	0	1	0	0	0	0	0	0	0	0	0	0	0	0	0	0	0	0	0	0	0	0	0	0	0	1	0
YDR085C	1	0	0	0	0	0	0	0	1	0	0	0	0	0	1	1	0	0	0	0	0	0	0	1	0	0	0	0	0	0	0	0	0	0	0	1	0	0	0	0	0	0	0	0	0	0	0	0	0
YDR086C	0	0	0	0	0	0	0	0	0	0	1	0	0	0	1	0	0	0	0	1	1	0	0	1	1	0	0	0	0	1	0	0	0	0	0	0	0	0	1	0	0	0	0	0	0	0	0	0	0
YDR087C	0	0	0	0	0	0	0	0	0	0	0	0	0	0	1	0	0	0	0	0	1	0	1	0	1	1	0	0	0	0	0	0	0	0	0	0	0	0	0	0	0	0	0	0	0	0	0	0	0
YDR088C	1	0	0	0	0	0	0	0	0	0	0	1	0	0	1	0	0	0	0	0	0	0	0	1	0	0	0	0	0	0	0	0	0	0	0	0	0	0	0	0	0	0	0	0	0	0	0	0	0
YDR089W	1	0	0	0	0	0	0	0	1	0	0	0	0	0	1	0	0	0	0	0	0	0	0	0	0	0	0	0	0	0	0	1	0	0	0	0	0	0	0	0	0	0	0	0	0	0	0	1	0
YDR090C	1	0	0	0	0	0	0	0	0	0	0	0	0	0	1	0	0	0	0	1	0	0	0	0	1	0	0	0	0	0	0	1	0	0	0	0	0	0	0	0	0	0	0	0	0	0	0	1	0
YDR091C	0	0	1	0	0	0	0	0	0	0	0	0	0	0	1	0	0	0	0	0	0	0	1	0	1	0	0	0	0	1	0	1	0	0	0	0	0	0	0	0	0	0	0	0	0	0	0	1	0
YDR092W	0	0	0	0	0	0	0	0	0	0	0	0	0	0	1	0	0	1	0	0	1	0	1	1	0	0	0	0	0	0	0	0	0	0	0	0	0	0	0	0	0	0	0	0	0	0	0	0	0
YDR093W	0	0	1	0	0	0	0	0	1	0	0	0	0	0	1	0	0	0	0	0	1	0	0	0	0	0	0	0	0	1	0	1	0	0	0	1	0	0	0	0	0	0	0	0	0	0	0	0	0
YDR096W	0	0	1	0	0	0	0	0	0	0	0	0	0	0	1	0	0	1	0	0	0	0	0	1	0	0	0	0	0	0	0	1	0	0	0	0	0	0	0	0	0	0	0	0	0	0	0	1	0
YDR097C	1	0	0	0	0	0	0	0	1	0	0	0	0	0	0	0	0	0	0	0	0	0	1	1	1	0	0	0	0	0	0	1	0	0	0	1	0	0	0	0	0	0	0	0	0	0	0	0	0
YDR098C	0	0	0	0	0	0	0	0	0	0	0	0	0	0	1	0	0	0	0	0	1	0	0	1	0	0	0	0	0	0	0	0	0	0	0	0	0	0	0	0	0	0	0	0	0	0	0	1	0
YDR099W	0	0	1	0	0	0	0	0	0	0	0	0	0	0	1	0	0	0	0	0	0	0	0	1	0	0	0	0	0	1	0	0	0	0	0	0	0	0	0	0	0	0	0	0	0	0	0	1	0
YDR100W	0	0	0	0	0	0	0	0	0	0	0	0	0	0	0	0	0	1	0	0	1	0	0	0	1	0	0	0	0	0	0	0	0	0	0	0	0	0	0	0	0	0	0	0	0	0	0	1	0
YDR101C	0	0	0	0	0	0	0	0	0	0	0	0	0	0	1	0	0	0	0	0	1	0	1	0	1	0	0	0	0	0	0	1	0	0	0	0	0	0	0	0	0	0	0	0	0	0	0	0	0
YDR103W	1	0	1	0	0	0	0	0	1	0	0	0	0	0	1	0	0	0	0	0	0	0	0	0	0	0	0	0	0	0	0	0	0	0	0	0	0	0	0	0	0	0	0	0	0	0	0	0	0
YDR104C	1	0	0	0	0	0	0	0	1	0	0	1	0	0	1	0	0	0	0	0	0	0	0	1	0	0	0	0	0	0	0	0	0	0	0	1	0	0	0	0	0	0	0	0	0	0	0	0	0
YDR105C	1	0	0	0	0	0	0	0	0	0	0	0	0	0	1	0	0	0	0	0	0	0	0	1	0	0	0	0	0	0	0	1	0	0	0	0	0	1	0	0	0	0	0	0	0	0	0	1	0
YDR106W	0	0	0	0	0	0	0	0	0	0	0	0	0	0	0	0	0	0	0	0	0	0	0	1	0	0	0	0	0	0	0	0	0	0	0	0	0	0	0	0	0	0	0	0	0	0	0	0	0
YDR107C	0	0	0	0	0	0	0	0	0	0	0	0	0	0	0	0	0	0	0	0	0	0	0	0	0	0	0	0	0	0	0	1	0	0	0	0	0	0	0	0	0	0	0	0	0	0	0	1	0
YDR108W	1	0	0	0	0	0	0	0	1	0	0	0	0	0	1	0	0	0	0	0	0	0	0	0	0	0	0	0	0	0	0	0	0	0	0	1	0	0	0	0	0	0	0	0	0	0	0	0	0
YDR109C	1	0	0	0	0	0	0	0	1	0	0	0	0	0	1	0	0	0	0	0	0	0	0	0	1	0	0	0	0	0	0	0	0	0	0	0	0	0	0	0	0	0	0	0	0	0	0	0	0
YDR110W	1	0	0	0	0	0	0	0	0	0	0	0	0	0	1	0	0	0	0	0	0	0	0	1	1	0	0	0	0	0	0	1	0	0	0	0	0	0	0	0	0	0	0	0	0	0	0	0	0
YDR111C	0	0	0	0	0	0	0	0	1	0	0	0	0	0	0	0	0	0	0	0	0	0	0	0	1	0	0	0	0	0	0	0	0	0	0	0	0	0	0	0	0	0	0	0	0	0	0	1	0
YDR113C	1	0	0	0	0	0	0	0	0	0	0	0	0	0	1	0	0	0	0	0	0	0	0	1	1	0	0	0	0	0	0	0	0	0	0	0	0	0	0	0	0	0	0	0	0	0	0	0	0
YDR114C	0	0	0	0	0	0	0	0	0	0	0	0	0	0	0	0	0	0	0	1	0	0	0	0	0	0	0	0	0	0	0	0	0	0	0	1	0	0	0	0	0	0	0	0	1	0	0	0	0
YDR115W	1	0	0	0	0	0	0	0	0	0	1	0	0	0	1	0	0	1	0	1	1	0	0	1	1	1	0	0	0	0	0	0	0	0	0	1	0	0	0	0	0	0	0	0	0	0	0	0	0
YDR116C	1	0	0	0	0	0	0	0	0	0	0	0	0	0	1	0	0	0	0	0	1	0	0	1	0	0	0	0	0	0	0	0	0	0	0	1	0	0	0	0	0	0	0	0	0	0	0	1	0
YDR117C	0	0	0	0	0	0	0	0	1	0	0	0	0	0	0	0	0	0	0	0	0	0	0	0	0	0	0	0	0	0	0	0	0	0	0	0	0	0	0	0	0	0	0	0	0	0	0	0	0
YDR118W	1	0	0	0	0	0	0	0	1	0	0	0	0	0	0	0	0	0	0	0	0	0	0	1	0	0	0	0	0	0	0	0	0	0	0	0	0	0	0	0	0	0	0	0	0	0	0	0	0
YDR119W	0	0	0	0	0	0	0	0	0	0	0	0	0	0	1	0	0	0	0	0	1	0	0	0	0	0	0	0	0	0	0	1	0	0	0	0	0	0	0	0	0	0	0	0	0	0	0	1	0
YDR119W-A	0	0	0	0	0	0	0	0	0	0	0	0	0	0	0	0	0	0	0	0	0	0	0	1	0	0	0	0	0	0	0	0	0	0	0	0	0	0	0	0	0	0	0	0	0	0	0	0	0
YDR120C	0	0	0	0	0	0	0	0	0	0	0	0	0	0	0	0	0	0	0	0	0	0	0	1	1	0	0	0	0	1	0	1	0	0	0	0	0	0	0	0	0	0	0	0	1	0	0	0	0
YDR121W	1	0	0	0	0	0	0	0	0	0	0	0	0	0	1	0	0	0	0	0	0	0	0	1	1	0	0	0	0	0	0	0	0	0	0	0	0	0	0	0	0	0	0	0	0	0	0	0	0
YDR122W	1	0	0	0	0	0	0	0	1	0	0	0	0	0	1	0	0	0	0	0	0	0	0	1	0	0	0	0	0	0	0	0	0	0	0	1	0	0	0	0	0	0	0	0	0	0	0	0	0
YDR123C	1	0	0	0	0	0	0	0	0	0	0	0	0	0	1	0	0	1	0	0	0	0	0	0	1	0	0	0	0	0	0	1	0	0	0	1	0	0	0	0	0	0	0	0	0	0	0	0	0
YDR124W	0	0	0	0	0	0	0	0	0	0	0	0	0	0	0	0	0	0	0	0	0	0	0	1	0	0	0	0	0	0	0	0	0	0	0	1	0	0	0	0	0	0	0	0	0	0	0	0	0
YDR125C	1	0	0	0	0	0	0	0	1	0	0	0	0	0	0	0	0	0	0	0	0	0	0	1	0	0	0	0	0	0	0	0	0	0	0	1	0	0	0	0	0	0	0	0	0	0	0	0	0
YDR126W	1	0	1	0	0	0	0	0	0	0	0	0	0	0	0	0	0	0	0	0	0	0	0	0	0	0	0	0	0	0	0	0	0	0	0	0	0	0	0	0	0	0	0	0	0	0	0	0	0
YDR127W	0	0	0	0	0	0	0	0	1	0	0	0	0	0	1	0	0	0	0	0	0	0	1	0	0	0	0	0	0	1	0	1	0	0	0	1	0	0	0	0	0	0	0	0	0	0	0	0	0
YDR128W	1	0	0	0	0	0	0	0	1	0	0	0	0	0	0	0	0	0	0	0	0	0	0	1	0	0	0	0	0	0	0	0	0	0	0	1	0	0	0	0	0	0	0	0	0	0	0	0	0
YDR129C	0	0	0	0	0	0	0	0	0	0	0	0	0	0	1	0	0	0	0	0	0	0	1	1	1	0	0	0	0	1	0	0	0	0	0	0	0	0	0	0	0	0	0	0	0	0	0	0	0
YDR130C	1	0	0	0	0	0	0	0	0	0	1	0	0	0	1	0	0	1	0	0	0	0	0	0	0	0	0	0	0	0	0	0	0	0	0	0	0	1	0	0	0	0	0	0	1	0	0	0	0
YDR131C	1	0	0	0	0	0	0	0	1	0	0	0	0	0	1	0	0	0	0	0	0	0	0	0	0	0	0	0	0	0	0	0	0	0	0	0	0	0	0	0	0	0	0	0	0	0	0	0	0
YDR132C	1	0	0	0	0	0	0	0	1	0	0	0	0	0	1	0	0	0	0	0	0	0	0	1	1	0	0	0	0	0	0	0	0	0	0	0	0	0	0	0	0	0	0	0	0	0	0	0	0
YDR133C	0	0	0	0	0	0	0	0	0	0	0	0	0	0	0	0	0	1	0	0	1	0	0	0	0	0	0	0	0	0	0	0	0	0	0	0	0	0	0	0	0	0	0	1	0	0	1	1	0
YDR134C	0	0	1	0	0	0	0	0	0	0	0	0	0	0	0	1	0	1	0	1	1	0	0	0	0	0	0	0	0	0	0	0	0	0	0	0	0	0	0	0	0	0	0	1	1	0	1	1	0
YDR135C	0	0	0	0	0	0	0	0	1	0	0	0	0	0	1	0	0	0	0	0	1	0	0	1	0	0	0	0	0	0	0	1	0	0	0	0	0	0	0	0	0	0	0	0	0	0	0	0	0
YDR137W	1	0	0	0	0	0	0	0	1	0	0	0	0	0	1	0	0	0	0	0	0	0	0	1	0	0	0	0	0	0	0	0	0	0	0	1	0	0	0	0	0	0	0	0	0	0	0	0	0
YDR138W	1	0	0	0	0	0	0	0	1	0	0	0	0	0	0	0	0	0	0	0	0	0	0	1	0	0	0	0	0	0	0	0	0	0	0	1	0	0	0	0	0	0	0	0	1	0	0	0	0
YDR139C	0	0	0	0	0	0	0	0	0	0	0	0	0	0	0	0	0	1	0	1	1	0	0	1	0	1	0	0	0	0	0	0	0	0	0	0	0	0	0	0	0	0	0	0	0	0	0	0	0
YDR140W	1	0	0	0	0	0	0	0	0	0	0	0	0	0	1	0	0	0	0	0	1	0	0	1	0	0	0	0	0	0	0	0	0	0	0	0	0	0	0	0	0	0	0	0	0	0	0	0	0
YDR141C	1	0	0	0	0	0	0	0	1	0	0	0	0	0	1	0	0	0	0	0	0	0	0	0	0	0	0	0	0	0	0	1	0	0	0	0	0	0	0	0	0	0	0	0	0	0	0	0	0
YDR142C	1	0	0	0	0	0	0	0	0	0	0	0	0	0	1	0	0	0	0	0	0	0	0	0	0	0	0	0	0	0	0	0	0	0	0	0	0	0	0	0	0	0	0	0	0	0	0	1	0
YDR143C	1	0	1	0	0	0	0	0	1	0	0	0	0	0	1	0	0	0	0	0	0	0	0	1	1	0	0	0	0	0	0	0	0	0	0	0	0	0	0	0	0	0	0	0	0	0	0	1	0
YDR144C	0	0	0	0	0	0	0	0	1	0	0	0	0	0	1	0	0	0	0	0	0	0	1	0	0	0	0	0	0	0	0	1	0	0	0	0	0	0	0	0	1	0	0	0	0	0	0	0	0
YDR145W	1	0	1	0	0	0	0	0	0	0	0	0	0	0	1	0	0	0	0	0	0	0	0	1	1	0	0	0	0	1	0	0	0	0	0	0	0	0	0	0	0	0	0	0	0	0	0	0	0
YDR146C	1	0	0	0	0	0	0	0	0	0	0	0	0	0	1	0	0	0	0	0	0	0	0	1	0	0	0	0	0	0	0	1	0	0	0	1	0	0	0	0	0	0	0	0	0	0	0	0	0
YDR147W	1	0	0	0	0	0	0	0	0	0	0	0	0	0	1	0	0	0	0	0	0	0	0	1	0	0	0	0	0	0	0	1	0	0	0	1	0	0	0	0	0	0	0	0	0	0	0	0	0
YDR148C	0	0	0	0	0	0	0	0	0	0	0	0	0	0	1	0	0	0	0	0	0	0	0	1	0	0	0	0	0	0	0	0	0	0	0	0	0	0	0	0	0	0	0	0	0	0	0	0	0
YDR150W	1	0	0	0	0	0	0	0	0	0	0	0	0	0	1	1	0	0	0	0	0	0	0	1	0	0	0	0	0	1	0	0	0	0	0	1	0	0	0	0	0	0	0	0	0	0	0	0	0
YDR151C	1	0	1	0	0	0	0	0	0	0	0	0	0	0	1	0	0	1	0	0	1	0	0	1	0	0	0	0	0	0	0	0	0	0	0	0	0	0	0	0	0	0	0	0	0	0	0	1	0
YDR152W	1	0	0	0	0	0	0	0	0	0	0	0	0	0	1	1	0	1	0	0	1	0	0	1	1	1	0	0	0	0	0	0	0	0	0	1	0	0	0	0	0	0	0	0	0	0	0	0	0
YDR153C	1	0	0	0	0	0	0	0	0	0	0	0	0	0	1	0	0	0	0	0	0	0	0	0	1	0	0	0	0	0	0	1	0	0	0	0	0	0	0	0	0	0	0	0	0	0	0	1	0
YDR154C	0	0	0	0	0	0	0	0	0	0	0	0	0	0	0	0	0	0	0	0	1	0	0	0	0	1	0	0	0	0	0	0	0	0	0	0	0	0	0	0	0	0	0	0	0	0	0	0	0
YDR155C	0	0	1	0	0	0	0	0	0	0	1	0	0	0	1	0	0	1	0	1	1	0	1	1	1	0	0	0	0	1	0	0	0	0	0	1	0	0	1	0	0	0	0	0	0	0	0	0	0
YDR156W	0	0	1	0	0	0	0	0	0	0	0	0	0	0	1	0	0	1	0	1	1	0	1	0	1	1	0	0	0	0	0	0	0	0	0	0	0	0	0	0	0	0	0	0	0	0	0	0	0
YDR157W	0	0	1	0	0	0	0	0	0	0	0	0	0	0	0	0	0	0	0	0	0	0	0	0	0	0	0	0	0	0	0	0	0	0	0	0	0	0	0	0	0	0	0	0	0	0	0	0	0
YDR158W	0	0	1	0	0	0	0	0	0	0	0	1	0	0	1	0	0	0	0	0	0	0	0	0	1	0	0	0	0	1	0	0	0	0	1	0	0	0	0	0	0	0	0	0	0	0	0	0	0
YDR159W	1	0	1	0	0	0	0	0	0	0	0	0	0	0	1	0	0	0	0	0	0	0	0	0	1	0	0	0	0	0	0	0	0	0	0	1	0	0	0	0	0	0	0	0	0	0	0	0	0
YDR160W	1	0	0	0	0	0	0	0	1	0	0	0	0	0	0	0	0	0	0	0	0	0	0	1	0	0	0	0	0	0	0	0	0	0	0	0	0	0	0	0	0	0	0	0	0	0	0	0	0
YDR161W	0	0	0	0	0	0	0	0	0	0	0	0	0	0	0	1	0	0	0	0	0	0	0	1	0	1	0	0	0	0	0	0	0	0	0	0	0	0	0	0	0	0	0	0	0	0	0	0	0
YDR162C	1	0	0	0	0	0	0	0	0	0	0	0	0	0	0	0	0	0	0	0	0	0	0	1	0	1	0	0	0	0	0	0	0	0	0	0	0	0	0	0	0	0	0	0	0	0	0	0	0
YDR163W	0	0	0	0	0	0	0	0	0	1	0	0	0	0	1	0	0	1	0	0	0	0	0	1	0	1	0	0	0	0	0	0	0	0	0	0	0	0	0	0	0	0	0	0	0	0	0	0	0
YDR164C	1	0	0	0	0	0	0	0	1	0	0	0	0	0	0	0	0	0	0	0	0	0	0	1	1	0	0	0	0	0	0	0	0	0	1	0	0	0	0	0	0	0	0	0	0	0	0	0	0
YDR165W	0	0	0	0	0	0	0	0	0	0	0	0	0	0	0	0	0	0	0	0	0	0	0	1	1	0	0	0	0	1	0	1	0	0	0	0	0	0	0	0	0	0	0	0	0	0	0	0	0
YDR166C	1	0	0	0	0	0	0	0	1	0	0	0	0	0	1	0	0	0	0	0	0	0	0	1	1	0	0	0	0	0	0	0	0	0	0	1	0	0	0	0	0	0	0	0	0	0	0	0	0
YDR167W	1	0	0	0	0	0	0	0	0	0	0	0	0	0	1	0	0	0	0	0	0	0	0	1	1	1	0	0	0	0	0	0	0	0	0	1	0	0	0	0	0	0	0	0	0	0	0	0	0
YDR168W	0	0	0	0	0	0	0	0	0	0	0	0	0	0	0	0	0	0	0	0	0	0	0	1	0	0	0	0	0	0	0	1	0	0	0	1	0	0	0	0	0	0	0	0	0	0	0	0	0
YDR169C	1	0	1	0	0	0	0	0	1	0	0	0	0	0	0	0	0	0	0	0	0	0	0	1	0	0	0	0	0	0	0	0	0	0	0	1	0	0	0	0	0	0	0	0	0	0	0	0	0
YDR170C	1	0	0	0	0	0	0	0	1	0	0	0	0	0	1	0	0	0	0	0	0	0	1	0	0	0	0	0	0	1	0	1	0	1	0	0	0	0	0	0	0	0	0	0	0	0	0	0	0
YDR171W	1	0	1	0	0	0	0	0	0	0	0	0	0	0	1	0	0	1	0	0	0	0	0	1	0	0	0	0	0	1	0	0	0	0	0	1	0	0	0	1	0	0	0	0	0	0	0	0	0
YDR172W	0	0	1	0	0	0	0	0	0	0	0	0	0	0	1	0	0	0	0	0	0	0	0	1	0	0	0	0	0	1	0	0	0	0	0	0	0	0	0	0	0	0	0	0	0	0	0	0	0
YDR173C	1	0	0	1	0	0	0	0	0	0	0	0	0	0	0	0	0	0	0	0	0	0	0	1	0	0	0	0	0	0	0	1	0	0	0	0	0	0	0	0	0	0	0	0	0	0	0	0	0
YDR174W	0	0	0	0	0	0	0	0	0	0	0	0	0	0	1	0	0	1	0	1	1	0	0	1	1	0	0	0	0	1	0	0	0	0	0	0	0	0	0	0	0	0	0	0	0	0	0	0	0
YDR175C	1	0	0	0	0	0	0	0	0	0	0	0	0	0	1	0	0	0	0	0	0	0	0	0	0	0	0	0	0	0	0	0	0	0	0	1	0	0	0	0	0	0	0	0	0	0	0	0	0
YDR176W	1	0	0	0	0	0	0	0	0	0	0	0	0	0	1	0	0	0	0	0	0	0	0	1	0	0	0	0	0	1	0	0	0	0	0	1	0	0	0	0	1	0	0	0	0	0	0	0	0
YDR177W	0	0	0	0	0	0	0	0	0	0	1	0	0	0	1	0	0	0	0	0	0	0	0	1	1	0	0	0	0	0	0	0	0	0	0	1	0	0	0	0	0	0	0	0	0	0	0	0	0
YDR178W	0	0	0	0	0	0	0	0	0	0	0	0	0	0	0	0	0	1	0	0	0	0	0	1	0	0	0	0	0	0	0	0	0	0	0	0	0	0	0	0	0	0	0	0	0	0	0	1	0
YDR179C	1	0	0	0	0	0	0	0	0	0	0	0	0	0	1	0	0	0	0	0	0	0	0	0	0	0	0	0	0	0	0	0	0	0	0	0	0	0	0	0	0	0	0	0	0	0	0	0	0
YDR179W-A	1	0	0	0	0	0	0	0	0	0	0	0	0	0	1	0	0	0	0	0	0	0	0	0	1	0	0	0	0	0	0	0	0	0	0	0	0	0	0	0	0	0	0	0	1	0	0	0	0
YDR180W	0	0	0	0	0	0	0	0	1	0	0	0	0	0	1	0	0	0	0	0	0	0	0	1	0	0	0	0	0	0	0	0	0	0	0	0	0	0	0	0	0	0	0	0	0	0	0	0	0
YDR181C	1	0	0	0	0	0	0	0	0	0	0	0	0	0	0	0	0	0	0	0	0	0	0	1	0	0	0	0	0	0	0	0	0	0	0	0	0	0	0	0	0	0	0	0	0	0	0	0	0
YDR182W	1	0	0	0	0	0	0	0	0	0	0	0	0	0	0	0	0	0	0	0	1	0	0	1	0	0	0	0	0	0	0	1	0	0	0	0	0	0	0	0	0	0	0	0	0	0	0	1	0
YDR182W-A	0	0	0	0	0	0	0	0	0	0	0	0	0	0	1	0	0	0	0	0	0	0	0	0	0	0	0	0	0	0	0	1	0	0	0	0	0	0	0	0	0	0	0	0	0	0	0	0	0
YDR183W	1	0	0	0	0	0	0	0	0	0	0	0	0	0	1	0	0	0	0	0	0	0	0	1	0	0	0	0	0	0	0	1	0	0	0	0	0	0	0	0	0	0	0	0	1	0	0	0	0
YDR184C	1	0	1	0	0	0	0	0	0	0	0	0	0	0	1	0	0	1	0	0	0	0	0	0	0	0	0	0	0	1	0	0	0	0	0	1	0	0	0	0	0	0	0	0	0	0	0	1	0
YDR185C	1	0	0	0	0	0	0	0	0	0	0	0	0	0	0	0	0	0	0	0	0	0	0	1	0	0	0	0	0	0	0	0	0	0	0	0	0	0	0	0	0	0	0	0	0	0	0	1	0
YDR186C	1	0	1	0	0	0	0	0	1	0	0	0	0	0	1	0	0	0	0	0	0	0	0	0	0	0	0	0	0	1	0	1	0	0	0	1	0	0	0	0	0	0	0	0	0	0	0	0	0
YDR188W	0	0	0	0	0	0	0	0	0	0	0	1	0	0	1	1	0	0	0	0	0	0	0	0	0	0	0	0	0	1	0	1	0	0	0	0	0	0	0	0	0	0	0	0	0	0	0	0	0
YDR189W	0	0	0	0	0	0	0	0	0	0	0	0	0	0	1	0	0	0	0	0	0	0	0	0	0	0	0	0	0	0	0	1	0	0	0	1	0	0	0	0	0	0	0	0	0	0	0	0	0
YDR190C	0	0	0	0	0	0	0	0	0	1	0	0	0	0	1	0	0	0	0	0	0	0	1	0	1	1	0	0	0	1	0	1	0	0	0	0	0	0	0	0	0	0	0	0	0	0	0	0	0
YDR191W	1	0	0	0	0	0	0	0	0	0	0	0	0	0	1	0	0	0	0	0	0	0	0	1	0	0	0	0	0	0	0	1	0	0	0	0	0	0	0	0	0	0	0	0	0	0	0	0	0
YDR192C	1	0	0	0	0	0	0	0	0	0	0	0	0	0	1	0	0	0	0	0	0	0	0	1	0	0	0	0	0	0	0	1	0	0	0	0	0	0	0	0	0	0	0	0	0	0	0	0	0
YDR194C	1	0	0	0	0	0	0	0	0	0	0	0	0	0	1	0	0	0	0	0	0	0	0	1	1	0	0	0	0	1	0	0	0	0	0	1	0	0	0	0	0	0	0	0	0	0	1	0	0
YDR195W	1	0	0	0	0	0	0	0	0	0	0	0	0	0	1	0	0	0	0	0	0	0	0	1	1	0	0	0	0	0	0	0	0	0	0	0	0	0	0	0	0	0	0	0	0	0	0	0	0
YDR196C	1	0	0	0	0	0	0	0	0	0	0	0	0	0	1	0	0	1	0	1	1	0	0	1	0	1	0	0	0	0	0	0	0	0	0	0	0	0	0	0	0	0	0	0	0	0	0	0	0
YDR197W	1	0	0	0	0	0	0	0	0	0	0	0	0	0	1	0	0	0	0	0	0	0	0	1	0	0	0	0	0	0	0	0	0	0	0	1	0	0	0	0	0	0	0	0	0	0	0	0	0
YDR198C	1	0	0	0	0	0	0	0	0	0	0	0	0	0	0	0	0	0	0	0	0	0	0	0	1	0	0	0	0	0	0	0	0	0	0	1	0	0	0	0	0	0	0	0	0	0	0	1	0
YDR200C	1	0	1	0	0	0	0	0	1	0	0	0	0	0	1	0	0	0	0	0	0	0	0	1	1	0	0	0	0	0	0	0	0	0	0	0	0	0	0	0	0	0	0	0	0	0	0	0	0
YDR201W	1	0	0	0	0	0	0	0	0	0	0	0	0	0	0	0	0	0	0	0	1	0	1	1	1	1	0	0	0	0	0	0	0	0	0	1	0	0	0	1	0	0	0	0	0	0	0	1	0
YDR202C	1	0	0	0	0	0	0	0	0	0	0	0	0	0	1	0	0	0	0	0	1	0	0	1	0	0	0	0	0	0	0	0	0	0	0	0	0	0	0	0	0	0	0	0	0	0	0	0	0
YDR204W	0	0	0	0	0	0	0	0	0	0	1	0	0	0	0	0	0	1	0	0	1	0	0	1	0	1	1	0	0	0	0	0	0	0	0	0	0	0	0	0	0	0	0	0	0	0	0	0	0
YDR205W	1	0	0	0	0	0	0	0	1	0	0	0	0	0	1	0	0	0	0	0	0	0	0	0	0	0	0	0	0	0	0	1	0	0	0	0	0	0	0	0	0	0	0	0	0	0	0	1	0
YDR206W	1	0	0	0	0	0	0	0	1	0	0	0	0	0	0	0	0	0	0	0	0	0	0	1	0	0	0	0	0	0	0	0	0	0	0	0	0	0	0	0	0	0	0	0	1	0	0	0	0
YDR207C	1	0	1	0	0	0	0	0	1	0	0	0	0	0	1	0	0	0	0	0	0	0	0	1	1	0	0	0	0	0	0	0	0	0	0	0	0	0	0	0	0	0	0	0	0	0	0	0	0
YDR208W	1	0	1	0	0	0	0	0	1	0	0	0	0	0	1	0	0	0	0	0	0	0	0	0	0	0	0	0	0	0	0	0	0	0	0	1	0	0	0	0	0	0	0	0	0	0	0	1	0
YDR210C-D	0	0	0	0	0	0	0	0	0	0	0	0	0	0	0	0	0	0	0	0	0	0	0	0	0	0	0	0	0	0	0	0	0	0	0	0	0	0	0	0	0	0	0	0	0	0	0	0	0
YDR210W	1	0	0	0	0	0	0	0	0	0	0	0	0	0	1	0	0	1	0	0	1	0	1	0	1	0	0	0	0	0	0	0	0	0	0	1	0	0	0	0	0	0	0	1	1	0	0	0	0
YDR211W	0	0	0	0	0	0	0	0	1	0	0	0	0	0	1	0	0	0	0	0	0	0	0	1	0	0	0	0	0	1	0	1	0	0	0	0	0	0	0	0	0	0	0	0	0	0	0	0	0
YDR212W	0	0	0	0	0	0	0	0	0	0	0	0	0	0	0	0	0	0	0	0	0	0	1	0	0	0	0	0	0	0	0	1	0	0	0	0	0	0	0	0	0	0	0	0	0	0	0	0	0
YDR213W	1	0	1	0	0	0	0	0	1	0	0	0	0	0	1	0	0	0	0	0	0	0	0	0	1	0	0	0	0	0	0	0	0	0	0	0	0	0	0	0	0	0	0	0	0	0	0	0	0
YDR214W	0	0	0	0	0	0	0	0	0	0	0	0	0	0	0	0	0	0	0	0	0	0	0	1	0	0	0	0	0	0	0	0	0	0	0	1	0	0	0	1	0	0	0	0	0	0	0	0	0
YDR216W	0	0	0	0	0	0	0	0	1	0	0	0	0	0	0	0	0	0	0	0	0	0	0	1	0	0	0	0	0	0	0	0	0	0	0	0	0	0	0	0	0	0	0	0	0	0	0	0	0
YDR217C	1	0	0	0	0	0	0	0	1	0	0	0	0	0	1	0	0	0	0	0	0	0	0	1	0	0	0	0	0	0	0	0	0	0	0	0	0	0	0	0	0	0	0	0	0	0	0	0	0
YDR218C	0	0	0	0	0	0	0	0	0	0	0	0	0	0	0	0	0	0	0	0	0	0	0	1	0	0	0	0	0	0	0	0	0	0	0	0	0	0	0	0	0	0	0	0	0	0	0	0	0
YDR219C	1	0	0	0	0	0	0	0	0	0	0	0	0	0	1	0	0	0	0	0	0	0	0	1	1	0	0	0	0	1	0	0	0	0	0	1	0	0	0	0	0	0	0	0	0	0	0	0	0
YDR221W	1	0	1	0	0	0	0	0	1	0	0	0	0	0	0	0	0	0	0	0	0	0	0	0	0	0	0	0	0	0	0	0	0	1	0	0	0	0	0	0	0	0	0	0	1	0	0	0	0
YDR222W	1	0	0	0	0	0	0	0	1	0	0	0	0	0	1	0	0	0	0	0	0	0	0	0	1	0	0	0	0	0	0	0	0	1	0	1	0	0	0	0	0	0	0	0	0	0	0	1	0
YDR223W	0	0	1	0	0	0	0	0	0	0	0	0	0	0	0	0	0	0	0	0	0	0	0	1	0	0	0	0	0	0	0	0	0	0	0	0	0	0	0	0	0	0	0	0	0	0	0	0	0
YDR224C	1	0	0	0	0	0	0	0	0	0	1	1	0	0	1	0	0	1	0	1	1	0	1	1	1	0	0	0	0	1	0	0	1	0	0	0	0	0	1	0	0	0	0	0	0	0	0	1	0
YDR225W	1	0	0	0	0	0	0	0	0	0	0	1	0	0	1	0	0	0	0	1	1	0	1	1	1	0	0	0	0	0	0	0	1	0	0	1	0	0	0	0	0	0	0	0	0	0	0	1	0
YDR226W	0	0	0	0	0	0	0	0	0	0	1	0	0	0	1	0	0	0	0	1	0	0	0	1	1	0	0	0	0	1	0	0	0	0	0	1	0	0	0	0	0	0	0	0	0	0	0	0	0
YDR227W	1	0	1	0	0	0	0	0	0	0	0	0	0	0	1	0	0	0	0	0	0	0	0	1	1	0	0	0	0	0	0	0	0	0	0	0	0	0	0	0	0	0	0	0	0	0	0	0	0
YDR228C	1	0	1	0	0	0	0	0	0	0	0	0	0	0	1	0	0	0	0	0	0	0	0	1	0	0	0	0	0	0	0	1	0	0	0	0	0	0	0	0	0	0	0	0	0	0	0	0	0
YDR229W	1	0	0	0	0	0	0	0	0	0	0	0	0	0	1	0	0	0	0	0	0	0	0	0	0	0	0	0	0	0	0	1	0	0	0	1	0	0	0	0	0	0	0	0	0	0	0	0	0
YDR231C	0	0	0	0	0	0	0	0	0	0	1	0	0	0	0	0	0	0	0	0	1	0	0	0	0	1	0	0	0	0	0	0	0	0	0	1	0	0	0	0	0	0	0	0	0	0	0	1	0
YDR232W	0	0	1	0	0	0	0	0	1	0	0	1	0	0	1	0	0	0	0	0	0	0	0	0	1	0	0	0	0	1	0	0	0	0	0	1	0	0	0	0	0	0	0	0	0	0	0	1	0
YDR233C	0	0	1	0	0	0	0	0	0	0	1	0	0	0	1	0	0	0	0	0	0	0	1	0	1	0	0	0	0	1	0	1	0	0	0	1	0	0	0	0	0	0	0	0	0	0	0	1	0
YDR234W	0	0	0	0	0	0	0	0	0	0	1	0	0	0	1	0	0	0	0	0	0	0	0	0	0	0	0	0	0	1	0	0	0	0	0	0	0	0	0	0	0	0	0	0	0	0	0	1	0
YDR235W	1	0	0	0	1	0	0	0	1	0	0	0	0	0	1	1	0	0	0	0	0	0	0	1	0	0	0	0	0	0	0	0	0	0	0	0	0	0	0	0	0	0	0	0	0	0	0	0	0
YDR236C	1	0	0	0	0	0	0	0	0	0	0	0	0	0	1	0	0	0	0	0	1	0	0	0	0	0	0	0	0	0	0	0	0	0	0	0	0	0	0	0	0	0	0	0	0	0	0	1	0
YDR237W	1	0	0	0	0	0	0	0	0	0	0	0	0	0	1	0	0	0	0	0	1	0	0	0	0	0	0	0	0	0	0	0	0	0	0	1	0	0	0	0	0	0	0	0	0	0	0	1	0
YDR238C	0	0	0	0	0	0	0	0	1	0	1	0	0	0	1	0	0	0	0	0	0	0	1	1	0	0	0	0	0	1	0	1	0	0	0	0	0	0	0	0	0	0	0	0	0	0	0	0	0
YDR239C	1	0	0	0	0	0	0	0	0	0	0	0	0	0	0	0	0	0	0	0	0	0	0	1	0	0	0	0	0	0	0	0	0	0	0	0	0	0	0	0	0	0	0	0	0	0	0	0	0
YDR240C	1	0	0	0	0	0	0	0	0	0	0	0	0	0	1	0	0	0	0	0	0	0	0	0	1	0	0	0	0	0	0	0	0	0	0	1	0	0	0	0	0	0	0	0	0	0	0	1	0
YDR242W	1	0	0	0	0	0	0	0	1	0	0	0	0	0	1	0	0	0	0	0	0	0	0	1	0	0	0	0	0	0	0	0	0	0	0	0	0	0	0	0	0	0	0	0	1	0	0	0	0
YDR243C	1	0	0	0	0	0	0	0	0	0	0	0	0	0	0	0	0	0	0	0	0	0	0	1	0	0	0	0	0	0	0	0	0	0	0	1	0	0	0	0	0	0	0	0	0	0	0	0	0
YDR244W	1	0	0	0	0	0	0	0	0	0	0	0	0	0	1	0	0	0	0	0	0	0	0	1	0	0	0	0	0	0	0	0	0	0	0	0	0	0	0	0	0	0	0	0	0	0	0	0	0
YDR245W	0	0	0	0	0	0	0	0	0	0	0	0	0	0	0	1	0	0	0	0	0	0	0	1	1	0	0	0	0	0	0	1	0	0	0	0	0	0	0	0	0	0	0	0	0	0	0	1	0
YDR246W	1	0	0	0	0	0	0	0	0	0	0	0	0	0	1	0	0	1	0	1	1	0	0	1	1	0	0	0	0	0	0	0	0	0	0	0	0	0	0	0	0	0	0	0	1	0	0	0	0
YDR247W	1	0	0	0	0	0	0	0	1	0	0	0	0	0	1	0	0	0	0	0	0	0	0	1	1	0	0	0	0	0	0	0	0	0	0	0	0	0	0	0	0	0	0	0	0	0	0	1	0
YDR248C	0	0	0	0	0	0	0	0	0	0	1	0	0	0	0	0	0	1	0	1	1	0	0	1	1	1	0	0	0	0	0	0	0	0	0	0	0	0	0	0	0	0	0	0	0	0	0	0	0
YDR249C	1	0	0	0	0	0	0	0	1	0	0	0	0	0	1	0	0	1	0	0	0	0	0	0	0	0	0	0	0	0	0	0	0	0	0	0	0	0	0	0	0	0	0	0	1	0	0	1	0
YDR251W	1	0	0	0	0	0	0	0	1	0	0	0	0	0	1	0	0	0	0	0	0	0	0	0	0	0	0	0	0	1	0	1	0	0	0	1	0	0	0	0	1	0	0	0	0	0	0	1	0
YDR252W	1	0	0	0	0	0	0	0	0	0	0	1	0	0	1	0	0	0	0	0	0	0	0	1	0	0	0	0	0	0	0	0	0	0	0	0	0	0	0	0	0	0	0	0	1	0	0	1	0
YDR253C	0	0	0	0	0	0	0	0	0	0	0	0	0	0	0	0	0	0	0	0	0	0	0	1	0	0	0	0	0	0	0	0	0	0	0	0	0	0	0	0	0	0	0	0	1	0	0	0	0
YDR254W	1	0	1	0	0	0	0	0	1	0	0	0	0	0	1	0	0	0	0	0	0	0	0	1	0	0	0	0	0	0	0	0	0	0	0	0	0	0	0	0	0	0	0	0	1	0	0	0	0
YDR255C	1	0	0	0	0	0	0	0	1	0	0	0	0	0	0	0	0	0	0	0	0	0	0	1	1	0	0	0	0	0	0	0	0	0	0	1	0	0	0	0	0	0	0	0	0	0	0	1	0
YDR256C	0	0	0	0	0	0	0	0	1	0	0	0	0	0	1	0	0	0	0	0	0	0	0	1	0	0	0	0	0	0	0	0	0	0	0	0	0	0	0	0	0	0	0	0	1	0	0	0	0
YDR257C	1	0	0	0	0	0	0	0	0	0	0	0	0	0	1	0	0	0	0	0	0	0	0	0	0	0	0	0	0	0	0	1	0	0	0	1	0	0	0	0	0	0	0	0	1	0	0	0	0
YDR258C	1	0	0	0	0	0	0	0	0	0	0	0	0	0	0	0	0	0	0	0	0	0	0	1	0	0	0	0	0	0	0	0	0	0	0	1	0	0	0	0	0	0	0	0	0	0	0	0	0
YDR259C	0	0	1	0	0	0	0	0	0	0	0	0	0	0	0	0	0	0	0	0	0	0	0	1	0	0	0	0	0	0	0	0	0	0	0	0	0	0	0	0	0	0	0	0	0	0	0	0	0
YDR260C	1	0	0	0	0	0	0	0	0	0	0	0	0	0	1	0	0	0	0	0	0	0	0	0	1	1	0	0	0	0	0	0	0	0	0	0	0	0	0	0	0	0	0	0	1	0	0	0	0
YDR261C	0	0	0	0	0	0	0	0	1	0	0	0	0	0	0	0	0	0	0	0	0	0	0	0	0	0	0	0	0	0	0	1	0	0	0	0	0	0	0	0	1	0	0	0	0	0	0	0	0
YDR261C-D	0	0	0	0	0	0	0	0	0	0	0	0	0	0	0	0	0	0	0	0	0	0	0	0	0	0	0	0	0	0	0	0	0	0	0	0	0	0	0	0	0	0	0	0	0	0	0	0	0
YDR261W-B	0	0	0	0	0	0	0	0	0	0	0	0	0	0	0	0	0	0	0	0	0	0	0	1	0	0	0	0	0	0	0	0	0	0	0	0	0	0	0	0	0	0	0	0	0	0	0	0	0
YDR262W	1	0	0	0	0	0	0	0	0	0	0	0	0	0	1	0	0	0	0	0	0	0	0	0	1	0	0	0	0	0	0	0	0	0	0	0	0	0	0	0	0	0	0	0	0	0	0	1	0
YDR263C	1	0	0	0	0	0	0	0	1	0	0	0	0	0	1	0	0	0	0	0	0	0	0	1	1	0	0	0	0	0	0	0	0	0	0	0	0	0	0	0	0	0	0	0	1	0	0	0	0
YDR264C	1	0	0	0	0	0	0	0	1	0	0	0	0	0	0	0	0	0	0	0	0	0	0	1	0	0	0	0	0	0	0	1	0	0	0	0	0	0	0	0	0	0	0	0	1	0	0	1	0
YDR265W	1	0	0	0	0	0	0	0	0	0	0	0	0	0	1	0	0	0	0	0	0	0	0	0	1	0	0	0	0	0	0	0	0	0	0	1	0	0	0	0	0	0	0	0	1	0	0	1	0
YDR266C	0	0	1	0	0	0	0	0	1	0	0	0	0	0	0	0	0	0	0	0	0	0	0	1	0	0	0	0	0	0	0	1	0	0	0	1	0	0	0	0	0	0	0	0	0	0	0	0	0
YDR267C	1	0	0	0	0	0	0	0	0	0	0	0	0	0	0	0	0	0	0	0	1	0	0	0	1	1	0	0	0	0	0	1	0	0	0	0	0	0	0	0	0	0	0	0	0	0	0	0	0
YDR268W	1	0	0	0	0	0	0	0	0	0	0	0	0	0	1	0	0	0	0	0	0	0	0	0	1	0	0	0	0	0	0	0	0	0	0	1	0	0	0	0	0	0	0	0	0	0	0	0	0
YDR269C	0	0	0	0	0	0	0	0	0	0	0	0	0	0	0	0	0	0	0	0	0	0	0	0	0	0	0	0	0	0	0	0	0	0	0	1	0	0	0	0	0	0	0	0	0	0	0	0	0
YDR270W	1	0	0	0	0	0	0	0	1	0	0	0	0	0	1	0	0	0	0	0	0	0	0	1	0	0	0	0	0	0	0	0	0	0	0	1	0	0	0	0	1	0	0	0	0	0	0	0	0
YDR271C	0	0	0	0	0	0	0	0	0	0	0	0	0	0	0	0	0	0	0	0	0	0	0	0	0	0	0	0	0	0	0	0	0	0	0	1	0	0	0	0	0	0	0	0	0	0	0	0	0
YDR272W	0	0	0	0	0	0	0	0	0	0	1	0	0	0	0	0	0	1	0	0	0	0	0	1	0	1	0	0	0	0	0	0	0	0	0	1	0	0	0	0	0	0	0	0	0	0	0	0	0
YDR273W	1	0	0	0	0	0	0	0	0	0	0	0	0	0	1	0	0	0	0	0	0	0	0	0	0	0	0	0	0	0	0	0	0	0	0	0	0	0	0	0	0	0	0	0	1	0	0	0	0
YDR274C	0	0	0	0	0	0	0	0	0	0	0	0	0	0	0	0	0	0	0	0	0	0	0	0	0	0	0	0	0	0	0	0	0	0	0	0	0	0	0	0	0	0	0	0	0	0	0	0	0
YDR275W	0	0	0	0	0	0	0	0	0	0	0	0	0	0	0	0	0	0	0	0	0	0	0	0	0	0	0	0	0	0	0	0	0	0	0	0	0	0	0	0	0	0	0	0	0	0	0	1	0
YDR276C	1	0	0	0	0	0	0	0	0	0	0	0	0	0	1	0	0	0	0	0	1	0	0	1	1	0	0	0	0	1	0	0	0	1	0	0	0	0	0	0	0	0	0	0	0	0	0	1	0
YDR277C	1	0	0	0	0	0	0	0	1	0	0	0	0	0	1	0	0	0	0	0	1	0	0	1	1	0	0	0	0	0	0	0	0	0	0	0	0	0	0	0	0	0	0	0	0	0	0	1	0
YDR279W	0	0	0	0	0	0	0	0	0	0	0	0	0	0	1	0	0	0	0	0	0	0	0	0	1	0	0	0	0	0	0	0	0	0	0	0	0	0	0	0	0	0	0	0	0	0	0	1	0
YDR280W	0	0	0	0	0	0	0	0	0	0	0	0	0	0	1	0	0	0	0	0	1	0	0	1	1	0	0	0	0	1	0	0	0	0	0	1	0	0	0	0	0	0	0	0	0	0	0	0	0
YDR281C	1	0	0	0	0	0	0	0	0	0	0	0	0	0	1	0	0	1	0	0	1	0	0	0	1	1	0	0	0	0	0	0	0	0	0	0	0	0	0	0	0	0	0	0	0	0	0	1	0
YDR282C	1	0	0	0	0	0	0	0	0	0	0	0	0	0	0	0	0	0	0	0	0	0	0	0	0	0	0	0	0	0	0	0	0	0	0	1	0	0	0	0	0	0	0	0	1	0	0	0	0
YDR283C	0	0	0	0	0	0	0	0	1	0	0	0	0	0	0	0	0	0	0	0	0	0	0	1	0	0	0	0	0	0	0	0	0	0	0	1	0	0	0	0	0	0	0	0	0	0	0	0	0
YDR284C	0	0	0	0	0	0	0	0	0	0	0	0	0	0	0	0	0	1	0	1	0	0	0	1	1	0	0	0	0	1	0	0	0	0	0	1	0	0	0	0	0	0	0	0	0	0	0	1	0
YDR285W	0	0	0	0	0	0	0	0	0	0	0	0	0	0	0	0	0	0	0	0	0	0	0	0	0	0	0	0	0	0	0	0	0	0	0	0	0	0	0	0	0	0	0	0	1	0	0	0	0
YDR286C	1	0	0	0	0	0	0	0	0	0	0	0	0	0	1	0	0	0	0	0	1	0	0	1	0	1	0	0	0	0	0	0	0	0	0	1	0	0	0	0	0	0	0	0	0	0	0	0	0
YDR287W	1	0	0	0	0	0	0	0	0	0	0	0	0	0	1	0	0	0	0	0	0	0	0	1	0	0	0	0	0	0	0	0	0	0	0	0	0	0	0	0	0	0	0	0	0	0	0	0	0
YDR288W	1	0	0	0	0	0	0	0	0	0	0	0	0	0	1	0	0	0	0	0	1	0	0	1	1	0	0	0	0	0	0	0	0	0	0	0	0	0	0	0	0	0	0	0	0	0	0	1	0
YDR289C	1	0	0	0	0	0	0	0	0	0	0	0	0	0	1	0	0	0	0	0	0	0	0	0	0	0	0	0	0	1	0	1	0	0	0	1	0	0	0	0	0	0	0	0	0	0	0	0	0
YDR291W	1	0	0	0	0	0	0	0	1	0	0	0	0	0	0	0	0	0	0	0	0	0	0	1	0	0	0	0	0	0	0	0	0	0	0	1	0	0	0	0	0	0	0	0	0	0	0	0	0
YDR292C	0	0	0	0	0	0	0	0	1	0	0	0	0	0	1	0	0	0	0	0	0	0	0	1	0	0	0	0	0	0	0	1	0	0	0	0	0	0	0	0	0	0	0	0	0	0	0	0	0
YDR293C	0	0	1	0	0	0	0	0	1	0	0	0	0	0	0	1	0	0	0	0	0	0	0	1	0	0	0	0	0	0	0	1	0	0	0	1	0	0	0	0	1	0	0	0	1	0	0	1	0
YDR294C	0	0	0	0	0	0	0	0	0	0	0	0	0	0	1	0	0	0	0	0	0	0	0	0	0	0	0	0	0	0	0	0	0	0	0	0	0	0	0	0	0	0	0	0	0	0	0	0	0
YDR295C	1	0	0	0	0	0	0	0	0	0	0	0	0	0	1	0	0	0	0	0	0	0	0	1	0	0	0	0	0	0	0	0	0	0	0	1	0	0	0	0	0	0	0	0	0	0	0	0	0
YDR296W	1	0	0	0	0	0	0	0	0	0	1	0	0	0	1	0	0	0	0	1	0	0	0	1	0	1	0	0	0	0	0	0	0	0	0	1	0	0	0	0	0	0	0	0	0	0	0	0	0
YDR297W	0	0	0	0	0	0	0	0	0	0	0	1	0	0	1	0	0	1	0	0	0	0	0	1	1	0	1	0	0	0	0	1	0	0	0	0	0	0	0	0	0	0	0	0	0	0	0	1	0
YDR298C	0	0	0	0	0	0	0	0	0	0	0	0	0	0	0	0	0	0	0	0	1	0	0	1	0	0	0	0	0	0	0	0	0	0	0	0	0	0	0	0	0	0	0	0	0	0	0	1	0
YDR299W	1	0	0	0	0	0	0	0	0	1	0	0	0	0	1	0	0	0	0	0	0	0	0	1	0	0	0	0	0	0	0	1	0	0	0	0	0	0	0	0	0	0	0	0	0	0	0	0	0
YDR300C	0	0	0	0	0	0	0	0	0	0	0	0	0	0	1	0	0	0	0	0	0	0	0	0	0	0	0	0	0	0	0	1	0	0	0	0	0	0	0	0	0	0	0	0	0	0	0	0	0
YDR301W	1	0	0	0	0	0	0	0	1	0	0	0	0	0	0	0	0	0	0	0	0	0	0	0	1	0	0	0	0	0	0	1	0	0	0	0	0	1	0	0	0	0	0	0	0	0	0	0	0
YDR302W	0	0	0	0	0	0	0	0	0	0	0	0	0	0	1	0	0	0	0	0	1	0	0	0	0	0	0	0	0	0	0	1	0	0	0	1	0	0	0	0	0	0	0	0	0	0	0	1	0
YDR303C	1	0	1	0	0	0	0	0	1	0	0	0	0	0	1	0	0	0	0	0	0	0	0	1	1	0	0	0	0	0	0	1	0	0	0	0	0	0	0	0	0	0	0	0	0	0	0	0	0
YDR304C	0	0	0	0	0	0	0	0	0	0	1	0	0	0	1	0	0	0	0	0	1	0	0	1	1	0	0	0	0	1	0	0	0	0	0	0	0	0	0	0	0	0	0	0	0	0	0	1	0
YDR305C	1	0	0	0	0	0	0	0	0	0	0	0	0	0	0	0	0	0	0	0	0	0	0	0	0	0	0	0	0	0	0	0	0	0	0	1	0	0	0	0	0	0	0	0	1	0	0	0	0
YDR306C	1	0	0	0	0	0	0	0	0	0	0	0	0	0	1	0	0	0	0	0	0	0	0	1	0	0	0	0	0	0	0	0	0	0	0	0	0	0	0	0	0	0	0	0	0	0	0	0	0
YDR307W	0	0	0	0	0	0	0	0	0	0	0	0	0	0	0	0	0	0	0	0	0	0	0	1	0	0	0	0	0	0	0	1	1	0	0	0	0	0	0	0	0	0	0	0	0	0	0	0	0
YDR308C	1	0	0	0	0	0	0	0	0	0	0	0	0	0	1	0	0	0	0	0	1	0	1	1	1	0	0	0	0	0	0	0	0	0	0	1	0	0	0	0	0	0	0	0	0	0	0	0	0
YDR309C	1	0	1	0	0	0	0	0	0	0	0	0	0	0	1	1	0	0	0	0	0	0	0	0	1	0	0	0	0	0	0	1	0	0	0	0	0	0	0	0	0	0	0	0	0	0	0	1	0
YDR310C	1	0	1	0	0	0	0	0	1	0	0	0	0	0	0	0	0	0	0	0	0	0	0	0	0	0	0	0	0	1	0	1	0	0	0	1	0	0	0	0	0	0	0	0	0	0	0	0	0
YDR311W	1	0	0	0	0	0	0	0	1	0	0	0	0	0	1	0	0	0	0	0	0	0	0	1	1	0	0	0	0	0	0	0	0	0	0	0	0	0	0	0	0	0	0	0	0	0	0	1	0
YDR312W	1	0	0	0	0	0	0	0	0	0	0	0	0	0	1	0	0	0	0	0	1	0	0	1	0	0	0	0	0	0	0	0	0	0	0	1	0	0	0	0	0	0	0	0	0	0	0	0	0
YDR313C	1	0	0	0	0	0	0	0	0	0	0	0	0	0	1	0	0	0	0	0	0	0	0	1	1	0	0	0	0	0	0	0	0	0	0	0	0	0	0	0	0	0	0	0	0	0	0	1	0
YDR314C	1	0	0	0	0	0	0	0	1	0	0	0	0	0	1	0	0	0	0	0	0	0	0	1	1	0	0	0	0	0	0	0	0	0	0	1	0	0	0	0	0	0	0	0	0	0	0	0	0
YDR315C	1	0	0	0	0	0	0	0	0	0	0	0	0	0	1	0	0	0	0	0	0	0	1	1	1	0	0	0	0	0	0	0	0	0	0	0	0	0	0	0	0	0	0	0	1	0	0	0	0
YDR316W	1	0	0	0	0	0	0	0	0	0	0	0	0	0	1	0	0	0	0	0	0	0	0	1	1	0	0	0	0	0	0	0	0	0	0	1	0	0	0	0	0	0	0	0	0	0	0	0	0
YDR316W-B	0	0	0	0	0	0	0	0	0	0	0	0	0	0	0	0	0	0	0	0	0	0	0	1	0	0	0	0	0	0	0	0	0	0	0	0	0	0	0	0	0	0	0	0	0	0	0	0	0
YDR317W	0	0	0	0	0	0	0	0	0	0	0	0	0	0	0	0	0	0	0	0	0	0	0	1	0	0	0	0	0	0	0	0	0	0	0	0	0	0	0	0	0	0	0	0	0	0	0	0	0
YDR318W	1	0	0	0	0	0	0	0	0	0	0	0	0	0	1	0	0	0	0	0	0	0	0	0	0	0	0	0	0	0	0	0	0	0	0	1	0	0	0	0	0	0	0	0	0	0	0	0	0
YDR319C	0	0	0	0	0	0	0	0	0	0	0	0	0	0	0	0	0	0	0	0	1	0	0	1	0	0	0	0	0	0	0	0	0	0	0	0	0	0	0	0	0	0	0	0	0	0	0	1	0
YDR320C	1	0	0	0	0	0	0	0	0	0	0	0	0	0	1	0	0	0	0	0	0	0	0	0	0	0	0	0	0	0	0	0	0	0	0	0	0	0	0	0	0	0	0	0	0	0	0	0	0
YDR320C-A	0	0	0	0	0	0	0	0	0	0	0	0	0	0	0	0	0	1	0	0	1	0	0	1	1	1	0	0	0	0	0	0	0	0	0	0	0	0	0	0	0	0	0	0	0	0	0	0	0
YDR321W	0	0	0	0	0	0	0	0	0	0	0	0	0	0	1	0	0	0	0	0	0	0	0	1	0	0	0	0	0	1	0	1	0	0	0	0	0	0	0	0	0	0	0	0	0	0	0	1	0
YDR322C-A	0	0	0	0	0	0	0	0	0	0	0	0	0	0	0	0	0	1	0	0	1	0	0	1	0	1	0	0	0	0	0	0	0	0	0	1	0	0	0	0	0	0	0	0	0	0	0	0	0
YDR322W	1	0	0	0	0	0	0	0	0	0	0	0	0	0	1	0	0	0	0	0	0	0	1	0	0	0	0	0	0	0	0	0	0	0	0	1	0	0	0	0	0	0	0	0	0	0	0	0	0
YDR323C	1	0	0	0	0	0	0	0	1	0	0	1	0	0	1	0	0	0	0	0	0	0	0	1	0	0	0	0	0	0	0	0	0	0	0	0	0	0	0	0	0	0	0	0	0	0	0	0	0
YDR324C	0	0	0	0	0	0	0	0	0	0	0	0	0	0	1	0	0	0	0	0	0	0	1	1	0	0	0	0	0	1	0	1	0	0	0	0	0	0	0	0	0	0	0	0	0	0	0	0	0
YDR325W	1	0	0	0	0	0	0	0	1	0	0	0	0	0	1	0	0	0	0	0	0	0	1	0	1	0	0	0	0	0	0	0	0	0	0	1	0	0	0	0	0	0	0	0	0	0	0	0	0
YDR326C	1	0	0	0	0	0	0	0	0	0	0	0	0	0	0	0	0	0	0	0	0	0	0	1	0	0	0	0	0	1	0	0	0	0	1	1	0	0	0	0	1	0	0	0	0	0	0	0	0
YDR328C	0	0	0	0	0	0	0	0	0	0	1	0	0	0	0	0	0	1	0	1	1	0	0	1	1	0	0	0	0	1	0	0	0	0	0	0	0	0	0	0	0	0	0	0	1	0	0	0	0
YDR329C	1	0	0	0	0	0	0	0	0	0	0	1	0	0	1	0	0	1	0	0	0	0	0	1	1	0	0	0	0	1	0	0	1	0	0	1	0	0	0	0	0	0	0	0	0	0	0	0	0
YDR330W	1	0	0	0	0	0	0	0	0	0	0	0	0	0	0	0	0	0	0	0	0	0	0	1	0	0	0	0	0	0	0	0	0	0	0	0	0	0	0	0	0	0	0	0	0	0	0	0	0
YDR331W	1	0	0	0	0	0	0	0	0	0	0	0	0	0	1	0	0	0	0	0	0	0	0	0	0	0	0	0	0	0	0	0	0	0	0	0	0	0	0	0	0	0	0	0	0	0	0	1	0
YDR332W	1	0	0	0	0	0	0	0	1	0	0	0	0	0	1	0	0	0	0	0	0	0	0	1	0	0	0	0	0	0	0	0	0	0	0	1	0	0	0	0	0	0	0	0	0	0	0	0	0
YDR333C	1	0	0	0	0	0	0	0	1	0	0	0	0	0	1	0	0	0	0	0	0	0	0	1	0	0	0	0	0	0	0	0	0	0	0	1	0	0	0	0	0	0	0	0	0	0	0	0	0
YDR334W	1	0	0	0	0	0	0	0	1	0	0	0	0	0	1	1	0	0	0	0	0	0	0	0	1	0	0	0	0	0	0	0	0	0	0	1	0	0	0	0	0	0	0	0	0	0	0	0	0
YDR335W	1	0	0	0	0	0	0	0	1	0	0	0	0	0	0	0	0	0	0	0	0	0	0	1	1	0	0	0	0	0	0	0	0	0	0	1	0	0	0	0	0	0	0	0	0	0	0	0	0
YDR336W	1	0	0	0	0	0	0	0	0	0	0	0	0	0	1	0	0	0	0	0	0	0	0	0	1	0	0	0	0	0	0	0	0	0	0	0	0	0	0	0	0	0	0	0	1	0	0	0	0
YDR337W	1	0	0	0	0	0	0	0	0	0	0	0	0	0	1	0	0	0	0	0	0	0	0	1	1	0	0	0	0	0	0	0	0	0	0	1	0	0	0	0	0	0	0	0	0	0	0	0	0
YDR338C	1	0	0	0	0	0	0	0	1	0	0	0	0	0	1	0	0	0	0	0	0	0	0	0	0	0	0	0	0	0	0	1	0	0	0	1	0	0	0	0	0	0	0	0	0	0	0	0	0
YDR339C	1	0	0	0	0	0	0	0	0	0	0	0	0	0	1	0	0	1	0	0	1	0	1	1	0	0	0	0	0	0	0	0	0	0	0	0	0	0	0	0	0	0	0	0	0	0	0	0	0
YDR341C	0	0	0	0	0	0	0	0	0	0	0	0	0	0	1	0	0	0	0	0	0	0	1	1	1	0	0	0	0	0	0	1	0	0	0	0	0	0	0	0	0	0	0	0	0	0	0	0	0
YDR342C	0	0	0	0	0	0	0	0	0	0	0	1	0	0	1	0	0	0	0	0	0	0	0	1	0	0	0	0	0	0	0	1	0	0	0	0	0	0	0	0	0	0	0	0	0	0	0	1	0
YDR343C	0	0	0	0	0	0	0	0	1	0	0	1	0	0	1	0	0	0	0	0	0	0	0	1	0	0	0	0	0	0	0	1	0	0	0	0	0	0	0	0	0	0	0	0	0	0	0	1	0
YDR345C	1	0	0	0	0	0	0	0	0	0	0	1	0	0	1	0	0	1	0	0	0	0	0	1	1	0	0	0	0	1	0	1	0	0	0	1	0	0	0	0	0	0	0	0	0	0	0	1	0
YDR346C	1	0	0	0	0	0	0	0	0	0	0	0	0	0	1	0	0	0	0	0	0	0	1	1	1	0	0	0	0	0	0	0	0	0	0	1	0	0	0	0	0	0	0	0	0	0	0	0	0
YDR347W	1	0	0	0	0	0	0	0	0	0	0	0	0	0	1	0	0	0	0	0	0	0	0	1	1	1	0	0	0	0	0	0	0	0	0	1	0	0	0	0	0	0	0	0	0	0	0	0	0
YDR348C	1	0	0	0	0	0	0	0	0	0	0	0	0	0	1	0	0	0	0	0	0	0	0	1	0	0	0	0	0	0	0	0	0	0	0	0	0	0	0	0	1	0	0	0	0	0	0	0	0
YDR349C	0	0	0	0	0	0	0	0	1	0	0	0	0	0	1	0	0	0	0	0	0	0	0	0	0	0	0	0	0	0	0	0	0	0	0	0	0	0	0	0	1	0	0	0	0	0	0	0	0
YDR350C	1	0	0	0	0	0	0	0	1	0	0	0	0	0	1	0	0	0	0	0	0	0	0	0	0	0	0	0	0	0	0	0	0	0	0	0	0	0	0	0	0	0	0	0	0	0	0	0	0
YDR351W	1	0	0	0	0	0	0	0	1	0	0	0	0	0	1	0	0	0	0	0	0	0	0	0	1	0	0	0	0	0	0	0	0	0	0	1	0	0	0	0	0	0	0	0	0	0	0	0	0
YDR352W	0	0	0	0	0	0	0	0	0	0	0	0	0	0	1	0	0	0	0	0	1	0	0	0	0	0	1	0	0	0	0	0	0	0	0	0	0	0	0	0	0	0	0	0	1	0	0	1	0
YDR353W	0	0	0	0	0	0	0	0	0	0	0	0	0	0	1	0	0	0	0	0	0	0	1	1	1	0	0	0	0	1	0	0	0	0	0	0	0	0	0	0	0	0	0	0	0	0	0	0	0
YDR354W	0	0	0	0	0	0	0	0	0	0	1	0	0	0	0	0	0	0	0	0	0	0	1	0	0	0	0	0	0	0	0	0	0	0	0	0	0	0	0	1	0	0	0	0	0	0	0	1	0
YDR356W	1	0	0	0	0	0	0	0	0	0	0	0	0	0	1	0	0	0	0	0	0	0	0	1	1	0	0	0	0	1	0	1	0	0	0	1	0	0	0	0	0	0	0	0	1	0	0	0	0
YDR357C	1	0	0	0	0	0	0	0	0	0	1	0	0	0	1	0	0	1	0	0	1	0	0	1	0	1	0	0	0	0	0	0	0	0	0	0	0	0	0	0	0	0	0	0	0	0	0	1	0
YDR358W	1	0	0	0	0	0	0	0	0	0	0	0	0	0	1	0	0	0	0	0	0	0	0	1	0	0	0	0	0	0	0	0	0	0	0	1	0	0	0	0	0	0	0	0	0	0	0	0	0
YDR359C	1	0	0	0	0	0	0	0	1	0	0	0	0	0	1	0	0	1	0	0	0	0	0	1	0	0	0	0	0	0	0	0	0	0	0	0	0	0	0	0	0	0	0	0	0	0	0	1	0
YDR361C	0	0	0	0	0	0	0	0	0	0	1	0	0	0	1	0	0	0	0	0	1	0	1	0	1	0	0	0	0	0	0	0	0	0	0	0	0	0	0	0	0	0	0	0	0	0	0	0	0
YDR362C	1	0	0	0	0	0	0	0	1	0	0	0	0	0	1	0	0	0	0	0	0	0	0	0	1	0	0	0	0	0	0	0	0	0	0	0	0	0	0	0	0	0	0	0	0	0	0	0	0
YDR363W	1	0	0	0	0	0	0	0	1	0	0	0	0	0	1	0	0	0	0	0	0	0	0	1	0	0	0	0	0	0	0	0	0	0	0	0	0	0	0	0	0	0	0	0	0	0	0	0	0
YDR363W-A	0	0	0	0	0	0	0	0	0	0	1	0	0	0	0	0	0	0	0	1	1	0	1	1	1	0	0	0	0	0	0	0	0	0	0	0	0	0	0	0	0	0	0	0	0	0	0	0	0
YDR364C	1	0	0	0	0	0	0	0	1	0	0	0	0	0	1	0	0	0	0	0	0	0	0	0	0	0	0	0	0	0	0	0	0	0	0	0	0	0	0	0	0	0	0	0	1	0	0	0	0
YDR365C	1	0	0	0	0	0	0	0	0	1	0	1	0	0	1	0	0	0	0	0	0	0	1	1	1	0	0	0	0	1	0	0	0	0	0	1	0	0	0	0	0	0	0	0	0	0	0	0	0
YDR365W-A	0	0	0	0	0	0	0	0	0	0	0	0	0	0	0	0	0	0	0	0	0	0	0	1	0	0	0	0	0	0	0	0	0	0	0	0	0	0	0	0	0	0	0	0	0	0	0	0	0
YDR365W-B	0	0	0	0	0	0	0	0	0	0	0	0	0	0	0	0	0	0	0	0	0	0	0	1	0	0	0	0	0	0	0	0	0	0	0	0	0	0	0	0	0	0	0	0	0	0	0	0	0
YDR366C	0	0	1	0	0	0	0	0	0	0	0	0	0	0	0	0	0	0	0	0	0	0	0	1	0	0	0	0	0	0	0	0	0	0	0	0	0	0	0	0	0	0	0	0	0	0	0	0	0
YDR367W	0	0	0	0	0	0	0	0	0	0	0	0	0	0	1	0	0	1	0	1	1	0	0	1	0	0	1	0	0	0	0	0	0	0	0	0	0	0	0	0	0	0	0	0	0	0	0	1	0
YDR368W	0	0	0	0	0	0	0	0	0	0	0	0	0	0	1	0	0	0	0	0	0	0	0	1	0	0	0	0	0	0	0	0	0	0	0	0	0	0	0	0	0	0	0	0	0	0	0	0	0
YDR369C	1	0	0	0	0	0	0	0	1	0	0	0	0	0	1	0	0	0	0	0	0	0	0	1	0	0	0	0	0	0	0	0	0	0	0	0	0	0	0	0	0	0	0	0	0	0	0	0	0
YDR370C	1	0	0	0	0	0	0	0	1	0	0	0	0	0	1	0	0	0	0	0	0	0	0	0	1	0	0	0	0	0	0	0	0	0	0	0	0	0	0	0	0	0	0	0	0	0	0	0	0
YDR371W	1	0	0	0	0	0	0	0	1	0	0	0	0	0	0	0	0	0	0	0	0	0	0	0	0	0	0	0	0	0	0	0	0	0	0	0	0	0	0	0	0	0	0	0	0	0	0	0	0
YDR372C	0	0	0	0	0	0	0	0	0	0	0	0	0	0	1	0	0	0	0	0	0	0	0	0	0	0	0	0	0	1	0	0	0	0	0	0	0	0	0	0	0	0	0	0	0	0	0	0	0
YDR373W	0	0	0	0	0	0	0	0	0	0	0	0	0	0	0	0	0	0	0	0	1	0	0	1	0	0	0	0	0	0	0	0	0	0	0	0	0	0	0	0	0	0	0	0	0	0	0	0	0
YDR374C	0	0	0	0	0	0	0	0	0	0	0	0	0	0	0	0	0	0	0	0	0	0	0	1	0	0	0	0	0	0	0	0	0	0	0	1	0	0	0	0	0	0	0	0	0	0	0	0	0
YDR374W-A	0	0	0	0	0	0	0	0	0	0	0	0	0	0	0	0	0	0	0	0	0	0	0	1	0	0	0	0	0	0	0	0	0	0	0	0	0	0	0	0	0	0	0	0	0	0	0	0	0
YDR375C	1	0	0	1	0	0	0	0	0	0	0	0	0	0	1	0	0	0	0	0	0	0	0	1	0	0	0	0	0	0	0	0	0	0	0	1	0	0	0	0	0	0	0	0	0	0	0	0	0
YDR376W	1	0	0	0	0	0	0	0	1	0	0	0	0	0	1	0	0	0	0	0	0	0	0	1	0	0	0	0	0	0	0	0	0	0	0	1	0	0	0	0	0	0	0	0	0	0	0	0	0
YDR377W	0	0	0	0	0	0	0	0	0	0	0	0	0	0	1	0	0	1	0	0	1	0	0	1	0	0	0	0	0	0	0	0	0	0	0	1	0	0	0	0	0	0	0	0	0	0	0	0	0
YDR378C	1	0	0	1	0	0	0	0	0	0	0	0	0	0	1	0	0	0	0	0	0	0	0	1	1	1	0	0	0	0	0	0	0	0	0	0	0	0	0	0	0	0	0	0	0	0	0	1	0
YDR379C-A	0	0	0	0	0	0	0	0	0	0	0	0	0	0	0	0	0	1	0	0	1	0	0	1	0	1	0	0	0	0	0	0	0	0	0	1	0	0	0	0	0	0	0	0	0	0	0	1	0
YDR379W	1	0	1	0	0	0	0	0	1	0	0	0	0	0	1	0	0	0	0	0	0	0	0	1	0	0	0	0	0	0	0	0	0	0	0	1	0	0	0	0	0	0	0	0	0	0	0	0	0
YDR380W	0	0	0	0	0	0	0	0	0	0	0	0	0	0	1	0	0	0	0	0	0	0	0	0	0	0	0	0	0	0	0	0	0	0	0	1	0	0	0	0	0	0	0	0	0	0	0	0	0
YDR381C-A	0	0	0	0	0	0	0	0	0	0	0	0	0	0	0	0	0	1	0	0	1	0	0	1	0	0	0	0	0	0	0	0	0	0	0	1	0	0	0	0	0	0	0	0	0	0	0	0	0
YDR381W	0	0	0	0	0	0	0	0	0	0	1	0	0	0	1	0	0	1	0	0	1	0	0	1	1	1	0	0	0	0	0	0	0	0	0	0	1	0	0	0	0	0	0	0	0	0	0	1	0
YDR382W	0	0	0	0	0	0	0	0	0	0	1	1	0	0	1	0	0	0	0	0	1	0	0	1	1	1	0	0	0	1	0	0	1	0	0	1	0	0	0	0	0	0	0	0	0	0	0	0	0
YDR383C	1	0	1	0	0	0	0	0	0	0	0	0	0	0	1	0	0	0	0	0	1	0	0	1	0	0	0	0	0	0	0	0	0	0	0	0	0	0	0	0	0	0	0	0	0	0	0	0	0
YDR384C	0	0	0	0	0	0	0	0	0	0	1	0	0	0	1	0	0	0	0	1	1	0	0	0	0	0	0	0	0	0	0	0	0	0	0	0	0	0	0	0	0	0	0	0	0	0	0	1	0
YDR385W	0	0	0	0	0	0	0	0	0	0	0	1	0	0	1	0	0	0	0	0	0	0	1	0	1	0	0	0	0	1	0	1	1	0	0	0	0	0	0	0	0	0	0	0	0	0	0	0	0
YDR386W	1	0	0	0	0	0	0	0	0	0	0	0	0	0	1	0	0	0	0	0	0	0	0	0	1	0	0	0	0	0	0	0	0	0	0	0	0	0	0	0	0	0	0	0	0	0	0	0	0
YDR387C	1	0	0	0	0	0	0	0	1	0	0	0	0	0	0	0	0	0	0	0	0	0	0	0	0	0	0	0	0	0	0	0	0	0	0	1	0	0	0	0	0	0	0	0	0	0	0	0	0
YDR388W	0	0	0	0	0	0	0	0	0	0	0	0	0	0	0	0	0	0	0	0	0	0	1	1	0	0	0	0	0	0	0	0	0	0	0	1	0	0	0	0	0	0	0	0	0	0	0	1	0
YDR389W	0	0	0	0	0	0	0	0	1	0	0	0	0	0	0	0	0	0	0	0	0	0	0	0	1	0	0	0	0	1	0	0	0	0	0	0	0	0	0	0	0	0	0	0	0	0	0	1	0
YDR390C	1	0	0	0	0	0	0	0	1	0	0	0	0	0	0	0	0	0	0	0	0	0	0	0	0	0	0	0	0	0	0	0	0	0	0	0	0	0	0	0	0	0	0	0	0	0	0	0	0
YDR391C	0	0	0	0	0	0	0	0	0	0	1	0	0	0	0	0	0	0	0	1	1	0	0	1	0	0	0	0	0	0	0	0	0	0	0	1	0	0	0	0	0	0	0	0	1	0	0	0	0
YDR392W	1	0	0	0	0	0	0	0	0	0	0	0	0	0	1	0	0	0	0	0	0	0	0	0	0	0	0	0	0	0	0	0	0	0	0	1	0	0	0	0	0	0	0	0	0	0	0	0	0
YDR393W	0	0	0	0	0	0	0	0	0	0	0	0	0	0	0	0	0	0	0	0	0	0	0	1	1	0	0	0	0	0	0	0	0	0	0	1	0	0	0	0	0	0	0	0	0	0	0	0	0
YDR394W	0	0	0	0	0	0	0	0	0	0	0	0	0	0	1	0	0	0	0	0	0	0	0	1	0	0	0	0	0	1	0	0	0	0	0	0	0	0	0	0	0	0	0	0	0	0	0	0	0
YDR395W	0	0	0	0	0	0	0	0	1	0	0	0	0	0	1	0	0	0	0	0	0	0	0	0	0	0	0	0	0	1	0	1	0	0	0	0	0	0	0	0	0	0	0	0	0	0	0	0	0
YDR397C	0	0	0	0	0	0	0	0	0	0	1	0	0	0	0	0	0	1	0	0	1	0	0	1	1	0	0	0	0	0	0	0	0	0	0	0	0	1	0	0	0	0	0	0	0	0	0	0	0
YDR398W	0	0	0	0	0	0	0	0	0	0	0	0	0	0	1	0	0	0	0	0	1	0	0	0	1	0	0	0	0	1	0	0	0	0	0	0	0	0	0	0	0	0	0	0	0	0	0	0	0
YDR399W	0	0	0	0	0	0	0	0	0	0	0	0	0	0	1	0	0	1	0	0	1	0	1	1	1	0	0	0	0	1	0	0	0	0	0	1	0	0	0	0	0	0	0	0	0	0	0	1	0
YDR400W	0	0	0	0	0	0	0	0	0	0	0	0	0	0	1	0	0	0	0	0	1	0	0	0	0	0	0	0	0	0	0	0	0	0	0	0	0	0	0	0	0	0	0	0	0	0	0	1	0
YDR402C	0	0	0	0	0	0	0	0	0	0	0	0	0	0	0	0	0	0	0	0	0	0	0	1	0	0	0	0	0	0	0	0	0	0	0	0	0	0	0	0	0	0	0	0	0	0	0	0	0
YDR403W	0	0	1	0	0	0	0	0	1	0	0	0	0	0	0	0	0	0	0	0	0	0	0	0	0	0	0	0	0	0	0	0	0	0	0	0	0	0	0	0	0	0	0	0	0	0	0	0	0
YDR404C	1	0	0	0	0	0	0	0	0	0	1	0	0	0	1	0	0	0	0	0	1	0	0	1	1	0	0	0	0	0	0	0	0	0	0	0	0	0	0	1	0	0	0	0	0	0	0	1	0
YDR405W	1	0	0	0	0	0	0	0	0	0	0	0	0	0	1	0	0	1	0	0	0	0	0	1	0	0	0	0	0	0	0	0	0	0	0	1	0	0	0	0	1	0	0	0	0	0	0	0	0
YDR406W	1	0	1	0	0	0	0	0	1	0	0	0	0	0	0	0	0	0	0	0	1	0	0	1	0	0	0	0	0	0	0	0	0	0	0	0	0	0	0	0	0	0	0	0	0	0	0	1	0
YDR407C	1	0	0	0	0	0	0	0	1	0	0	0	0	0	1	0	0	0	0	0	0	0	0	1	0	0	0	0	0	0	0	0	0	0	0	1	0	0	0	0	0	0	0	0	0	0	0	0	0
YDR408C	1	0	0	0	0	0	0	0	0	0	0	1	0	0	0	0	0	0	0	0	1	0	0	1	0	1	0	0	0	0	0	0	0	0	0	0	0	0	0	0	0	0	0	0	0	0	0	0	0
YDR409W	1	0	1	0	0	0	0	0	1	0	0	0	0	0	1	0	0	0	0	0	0	0	0	0	0	0	0	0	0	0	0	0	0	0	0	0	0	0	0	0	0	0	0	0	0	0	0	0	0
YDR410C	1	0	0	0	0	0	0	0	0	1	0	0	0	0	1	0	0	1	0	0	1	0	0	0	0	0	0	0	0	0	0	0	0	0	0	0	0	0	0	0	0	0	0	0	0	0	0	1	0
YDR411C	0	0	0	0	0	0	0	0	0	0	1	0	0	0	0	0	0	1	0	1	0	0	0	0	0	0	1	0	0	0	0	1	0	0	0	0	0	0	0	1	0	0	0	0	0	0	0	1	0
YDR412W	1	0	0	0	0	0	0	0	0	1	0	0	0	0	1	0	0	0	0	0	0	0	1	0	1	1	0	0	0	0	0	0	0	0	0	0	0	0	0	0	0	0	0	0	0	0	0	0	0
YDR414C	0	0	0	0	0	0	0	0	1	0	0	0	0	0	1	0	0	0	0	0	0	0	0	1	0	0	0	0	0	0	0	1	0	0	0	0	1	0	0	0	0	0	0	0	0	0	0	0	0
YDR415C	1	0	0	0	0	0	0	0	0	0	0	0	0	0	0	0	0	0	0	0	0	0	0	0	1	0	0	0	0	0	0	0	0	0	0	0	0	0	0	0	0	0	0	0	0	0	0	0	0
YDR416W	1	0	0	0	0	0	0	0	1	0	0	0	0	0	1	0	0	0	0	0	0	0	0	0	0	0	0	0	0	0	0	0	0	0	0	0	0	0	0	0	0	0	0	0	0	0	0	0	0
YDR418W	0	0	0	0	0	0	0	0	0	0	1	1	0	0	1	0	0	1	0	1	1	0	0	1	1	1	0	0	0	1	0	0	1	0	0	0	0	0	1	0	0	0	0	0	0	0	0	0	0
YDR419W	1	0	0	0	0	0	0	0	1	0	0	0	0	0	0	1	0	0	0	0	0	0	1	0	0	0	0	0	0	0	0	0	0	0	0	0	0	0	0	0	0	0	0	0	1	0	0	0	0
YDR420W	1	0	1	0	0	0	0	0	0	0	0	1	0	0	1	1	0	0	1	0	0	0	0	0	1	0	0	0	0	0	0	0	0	0	0	0	0	0	0	0	0	0	0	0	0	0	0	0	0
YDR421W	1	0	0	0	0	0	0	0	1	0	0	0	0	0	1	0	0	0	0	0	0	0	0	1	0	0	0	0	0	0	0	0	0	0	0	0	0	0	0	0	0	0	0	0	0	0	0	0	0
YDR422C	1	0	0	0	0	0	0	0	1	0	0	0	0	0	0	1	0	0	0	0	0	0	0	0	0	0	0	0	0	0	0	0	0	0	0	0	0	0	0	0	1	0	0	0	0	0	0	1	0
YDR423C	1	0	0	0	0	0	0	0	0	0	0	0	0	0	1	0	0	1	0	0	0	0	0	1	1	0	0	0	0	1	0	1	0	0	0	0	0	0	0	1	0	0	0	0	0	0	0	0	0
YDR424C	0	0	0	0	0	0	0	0	0	0	0	0	0	0	0	0	0	1	0	0	1	0	0	1	0	0	0	0	0	0	0	0	0	0	0	0	0	0	0	0	0	0	0	0	0	0	0	1	0
YDR425W	1	0	1	0	0	0	0	0	0	0	0	0	0	0	1	0	0	0	0	0	0	0	0	1	1	0	0	0	0	0	0	0	0	0	0	0	0	0	0	0	0	0	0	0	0	0	0	0	0
YDR426C	0	0	1	0	0	0	0	0	0	0	0	0	0	0	0	0	0	0	0	0	0	0	0	0	0	0	0	0	0	0	0	0	0	0	0	0	0	0	0	0	0	0	0	0	0	0	0	0	0
YDR427W	0	0	0	0	0	0	0	0	0	0	0	0	0	0	1	0	0	0	0	0	1	0	0	1	0	0	0	0	0	0	0	1	0	0	0	0	0	0	0	0	0	0	0	0	0	0	0	0	0
YDR428C	1	0	0	0	0	0	0	0	0	0	0	0	0	0	1	0	0	0	0	0	1	0	0	1	1	0	0	0	0	0	0	1	0	0	0	0	0	0	0	0	0	0	0	0	0	0	0	0	0
YDR429C	0	0	0	0	0	0	0	0	0	0	1	0	0	0	1	0	0	0	0	0	1	0	1	1	0	0	0	0	0	1	0	0	0	0	0	1	0	0	0	0	0	0	0	0	0	0	0	0	0
YDR430C	0	0	0	0	0	0	0	0	1	0	0	0	0	0	1	0	0	0	0	0	0	0	1	1	1	0	0	0	0	0	0	0	0	0	0	1	0	0	0	0	0	0	0	0	0	0	0	0	0
YDR432W	0	0	1	0	0	0	0	0	0	0	0	0	0	0	1	0	0	1	0	0	0	0	0	1	1	0	0	0	0	1	0	0	0	0	0	0	0	0	0	0	0	0	0	0	1	0	0	0	0
YDR433W	0	0	0	0	0	0	0	0	0	0	0	0	0	0	0	0	0	1	0	0	0	0	0	0	0	0	0	0	0	0	0	0	0	0	0	0	0	0	0	0	0	0	0	0	0	0	0	0	0
YDR434W	0	0	0	0	0	0	0	0	1	0	0	0	0	0	0	0	0	0	0	0	0	0	0	0	0	0	0	0	0	1	0	0	0	0	0	0	0	0	0	0	0	0	0	0	0	0	0	0	0
YDR435C	1	0	0	0	0	0	0	0	0	0	0	0	0	0	0	0	0	0	0	0	1	0	0	1	0	0	0	0	0	0	0	0	0	0	0	0	0	0	0	0	0	0	0	0	0	0	0	0	0
YDR436W	1	0	1	0	0	0	0	0	1	0	0	0	0	0	1	0	0	0	0	0	0	0	0	1	0	0	0	0	0	0	0	0	0	0	0	0	0	0	0	0	0	0	0	0	0	0	0	0	0
YDR437W	1	0	0	0	0	0	0	0	0	0	0	0	0	0	1	0	0	1	0	0	0	0	0	0	1	0	0	0	0	0	0	0	0	0	0	0	0	0	0	1	0	0	0	0	0	0	0	1	0
YDR438W	0	0	1	0	0	0	0	0	1	0	0	0	0	0	0	0	0	0	0	0	0	0	0	0	0	0	0	0	0	0	0	0	0	0	0	0	0	0	0	0	0	0	0	0	1	0	0	0	0
YDR439W	0	0	0	0	0	0	0	0	0	0	0	0	0	0	1	0	0	0	0	0	0	0	0	1	0	0	0	0	0	0	0	0	0	0	0	0	0	0	0	0	0	0	0	0	0	0	0	1	0
YDR440W	1	0	0	0	0	0	0	0	0	0	0	0	0	0	1	0	0	0	0	0	0	0	0	1	1	0	0	0	0	0	0	0	0	0	0	0	0	0	0	0	0	0	0	0	0	0	0	0	0
YDR441C	1	0	0	0	0	0	0	0	0	0	0	0	0	0	0	1	0	1	0	0	0	0	0	1	1	1	0	0	0	0	0	0	0	0	0	0	0	0	0	0	0	0	0	1	1	0	0	1	0
YDR443C	1	0	0	0	0	0	0	0	1	0	0	0	0	0	1	0	0	0	0	0	0	0	0	1	0	0	0	0	0	0	0	0	0	0	0	0	0	0	0	0	0	0	0	0	1	0	0	1	0
YDR444W	1	0	0	0	0	0	0	0	0	0	0	0	0	0	1	0	0	0	0	0	0	0	0	1	0	0	0	0	0	0	0	0	0	0	0	0	0	0	0	0	0	0	0	0	0	0	0	0	0
YDR447C	0	0	0	0	0	0	0	0	0	0	1	1	0	0	1	0	0	1	0	1	1	0	0	1	0	1	0	0	0	0	0	0	1	0	0	1	0	0	0	1	0	0	0	0	0	0	0	0	0
YDR448W	1	0	0	0	0	0	0	0	0	0	0	0	0	0	1	0	0	0	0	0	0	0	0	1	1	0	0	0	0	0	0	0	0	0	0	0	0	0	0	0	0	0	0	0	0	0	0	0	0
YDR449C	1	0	0	0	0	0	0	0	0	0	0	0	0	0	1	0	0	0	0	0	0	0	0	0	1	0	0	0	0	0	0	1	0	0	0	1	0	0	0	0	0	0	0	0	0	0	0	0	0
YDR450W	0	0	0	0	0	0	0	0	0	0	1	0	0	0	1	0	0	1	0	1	1	0	0	0	1	1	0	0	0	0	0	0	0	0	0	1	0	0	0	0	0	0	0	0	0	0	0	0	0
YDR451C	1	0	0	0	0	0	0	0	0	0	1	0	0	0	1	0	0	0	0	0	0	0	1	0	1	0	0	0	0	0	0	0	0	0	0	1	0	0	0	0	0	0	0	0	0	0	0	1	0
YDR452W	1	0	0	0	0	0	0	0	0	0	1	0	0	0	0	0	0	0	0	0	0	0	0	1	0	0	0	0	0	0	0	1	0	0	0	0	0	0	0	0	0	0	0	0	0	0	0	0	0
YDR453C	1	0	0	0	0	0	0	0	0	0	1	0	0	0	0	0	0	1	0	0	1	0	0	1	0	0	0	0	0	0	0	0	0	0	0	0	0	0	0	1	0	0	0	0	0	0	0	0	0
YDR454C	0	0	0	0	0	0	0	0	0	0	1	0	0	0	0	0	0	1	0	0	1	0	0	0	1	1	0	0	0	0	0	0	0	0	0	0	0	0	0	1	0	0	0	0	0	0	0	0	0
YDR456W	0	0	0	0	0	0	0	0	1	0	1	0	0	0	1	0	0	0	0	0	0	0	0	1	0	0	0	0	0	0	0	1	0	0	0	1	0	0	0	0	0	0	0	0	0	0	0	1	0
YDR457W	1	0	0	0	0	0	0	0	1	0	0	0	0	0	1	0	0	0	0	0	0	0	0	1	1	0	0	0	0	1	0	1	0	0	0	1	0	0	0	0	0	0	0	0	0	0	0	1	0
YDR458C	1	0	0	0	0	0	0	0	0	0	0	0	0	0	1	0	0	0	0	0	0	0	1	0	1	0	0	0	0	0	0	1	0	0	0	0	0	0	0	0	0	0	0	0	0	0	0	0	0
YDR459C	1	0	0	0	0	0	0	0	0	0	0	0	0	0	1	0	0	0	0	1	0	0	0	0	0	0	0	0	0	0	0	0	0	0	0	0	0	0	0	0	0	0	0	0	1	0	0	0	0
YDR460W	1	0	1	0	0	0	0	0	0	0	0	0	0	0	1	0	0	0	0	0	0	0	0	0	1	1	0	0	0	0	0	0	0	0	0	0	0	0	0	0	0	0	0	0	0	0	0	1	0
YDR461C-A	0	0	0	0	0	0	0	0	0	0	0	0	0	0	0	0	0	0	0	0	0	0	0	1	0	0	0	0	0	0	0	0	0	0	0	0	0	0	0	0	0	0	0	0	0	0	0	0	0
YDR461W	1	0	0	0	0	0	0	0	0	0	1	0	0	0	1	0	0	1	0	1	1	0	0	0	1	1	0	0	0	0	0	0	0	0	0	1	0	0	0	0	0	0	0	1	1	0	0	1	0
YDR462W	1	0	0	0	0	0	0	0	0	0	0	0	0	0	1	0	0	1	0	0	1	0	0	1	0	1	0	0	0	0	0	0	0	0	0	1	0	0	0	0	0	0	0	0	0	0	0	0	0
YDR463W	1	0	0	0	0	0	0	0	0	0	0	0	0	0	1	0	0	0	0	0	0	0	1	0	0	0	0	0	0	0	0	1	0	0	0	0	0	0	0	0	0	0	0	0	0	0	0	0	0
YDR464W	1	0	0	0	0	0	0	0	1	0	0	0	0	0	1	1	0	0	0	0	0	0	0	1	0	0	0	0	0	0	0	0	0	0	0	0	0	0	0	0	0	0	0	0	0	0	0	0	0
YDR465C	0	0	0	0	0	0	0	0	0	0	0	0	0	0	0	1	0	0	0	0	0	0	0	0	0	1	0	0	0	0	0	0	0	0	0	0	0	0	0	0	0	0	0	0	0	0	0	0	0
YDR466W	1	0	1	0	0	0	0	0	1	0	0	0	0	0	0	0	0	0	0	0	0	0	0	1	1	0	0	0	0	0	0	0	0	0	0	0	0	0	0	0	0	0	0	0	0	0	0	0	0
YDR468C	1	0	0	0	0	0	0	0	0	0	0	0	0	0	1	0	0	0	0	1	0	0	0	1	1	1	0	0	0	0	0	0	0	0	0	1	0	0	0	0	0	0	0	0	0	0	0	0	0
YDR469W	1	0	0	0	0	0	0	0	0	0	1	0	0	0	1	0	0	1	0	0	1	0	0	1	1	0	0	0	0	0	0	0	0	0	0	0	0	0	0	0	0	0	0	0	0	0	0	0	0
YDR470C	1	0	0	0	0	0	0	0	0	0	0	0	0	0	0	0	0	0	0	0	0	0	1	1	0	0	0	0	0	0	0	1	0	0	0	1	0	0	0	1	0	0	0	0	0	0	0	1	0
YDR471W	0	0	0	0	0	0	0	0	0	0	1	0	0	0	1	0	0	1	0	1	1	0	1	1	1	1	0	0	0	1	0	0	0	0	0	1	0	0	1	0	0	0	0	0	0	0	0	1	0
YDR472W	1	0	1	0	0	0	0	0	0	0	0	0	0	0	1	0	0	1	0	0	0	0	0	0	0	0	0	0	0	0	0	0	0	0	0	0	0	0	0	0	0	0	0	0	0	0	0	0	0
YDR473C	1	0	0	0	1	0	0	0	0	0	0	0	0	0	1	0	0	0	0	0	0	0	0	1	1	0	0	0	0	0	0	1	0	0	0	1	0	0	0	0	0	0	0	0	0	0	0	0	0
YDR475C	1	0	0	0	0	0	0	0	1	0	0	0	0	0	0	0	0	1	0	0	0	0	0	1	0	0	0	0	0	0	0	0	0	0	0	0	0	0	0	0	1	0	0	0	0	0	0	0	0
YDR476C	1	0	0	0	0	0	0	0	0	0	0	0	0	0	0	0	0	1	0	0	1	0	0	0	1	0	0	0	0	0	0	0	0	0	0	0	0	0	0	0	0	0	0	0	0	0	0	1	0
YDR477W	0	0	0	0	0	0	0	0	1	0	0	0	0	0	1	0	0	0	0	0	0	0	0	1	0	0	0	0	0	0	0	1	0	0	0	0	0	0	0	0	0	0	0	0	0	0	0	0	0
YDR478W	0	0	0	0	0	0	0	0	0	0	0	0	0	0	0	0	0	0	0	0	0	0	0	1	0	0	0	0	0	0	0	0	0	0	0	0	0	0	0	0	0	0	0	0	0	0	0	0	0
YDR479C	1	0	0	0	0	0	0	0	1	0	0	0	0	0	1	0	0	0	0	0	0	0	0	1	1	0	0	0	0	0	0	0	0	0	0	1	0	0	0	0	0	0	0	0	0	0	0	0	0
YDR480W	1	0	0	0	0	0	0	0	0	0	0	0	0	0	0	0	0	0	0	0	0	0	0	0	0	0	0	0	0	0	0	0	0	0	0	0	0	0	0	0	0	0	0	0	0	0	0	0	0
YDR481C	0	0	0	0	0	0	0	0	0	0	1	0	0	0	1	0	0	1	0	0	1	0	0	1	0	0	0	0	0	1	0	1	0	0	0	0	0	0	0	0	1	0	0	0	0	0	0	1	0
YDR482C	1	0	1	0	0	0	0	0	0	0	1	0	0	0	1	0	0	0	0	0	0	0	0	1	1	1	0	0	0	0	0	0	0	0	0	1	0	0	0	0	0	0	0	0	0	0	0	0	0
YDR483W	0	0	0	0	0	0	0	0	0	0	0	0	0	0	0	0	0	0	0	0	0	0	0	1	0	0	0	0	0	1	0	0	0	0	0	0	0	0	0	0	0	0	0	0	0	0	0	1	0
YDR484W	1	0	0	0	0	0	0	0	0	0	0	0	0	0	1	0	0	0	0	0	0	0	0	1	1	0	0	0	0	0	0	0	0	0	0	0	0	0	0	0	0	0	0	0	0	0	0	0	0
YDR485C	1	0	1	0	0	0	0	0	0	0	0	0	0	0	1	0	0	0	0	0	0	0	0	1	0	0	0	0	0	1	0	0	0	0	0	1	0	0	0	0	0	0	0	0	0	0	0	0	0
YDR486C	1	0	0	0	0	0	0	0	0	0	1	0	0	0	1	0	0	1	0	0	0	0	0	1	0	0	0	0	0	1	0	0	0	0	0	0	0	0	0	0	0	0	0	0	0	0	0	1	0
YDR487C	0	0	0	0	0	0	0	0	0	0	1	0	0	0	0	0	0	0	0	0	1	0	0	1	1	0	0	0	0	1	0	0	0	0	0	1	0	0	0	0	0	0	0	0	0	0	0	0	0
YDR488C	1	0	1	0	0	0	0	0	1	0	0	0	0	0	0	0	0	0	0	0	0	0	0	0	0	0	0	0	0	1	0	0	0	0	0	0	0	0	0	0	0	0	0	0	1	0	0	0	0
YDR489W	1	0	0	0	0	0	0	0	0	0	0	0	0	0	1	0	0	0	0	0	0	0	0	0	0	0	0	0	0	0	0	0	0	0	0	0	0	0	0	0	0	0	0	0	0	0	0	1	0
YDR490C	1	0	0	0	0	0	0	0	1	0	0	0	0	0	0	0	0	0	0	0	0	0	0	0	0	0	0	0	0	0	0	0	0	0	0	0	0	0	0	0	0	0	0	0	0	0	0	0	0
YDR492W	0	0	1	0	0	0	0	0	0	0	0	0	0	0	1	0	0	1	0	0	0	0	0	0	0	0	0	0	0	0	0	1	0	0	0	0	0	0	0	0	0	0	0	0	0	0	0	1	0
YDR493W	1	0	0	0	0	0	0	0	0	0	0	0	0	0	1	0	0	1	0	0	1	0	0	1	1	1	0	0	0	0	0	0	0	0	0	1	0	0	0	0	0	0	0	0	0	0	0	0	0
YDR494W	1	0	0	0	0	0	0	0	0	0	0	0	0	0	1	1	0	1	0	0	0	0	0	1	0	1	0	0	0	1	0	0	0	0	0	1	0	0	0	1	0	0	0	0	0	0	0	0	0
YDR495C	0	0	0	0	0	0	0	0	0	0	0	0	0	0	1	0	0	0	0	0	0	0	0	1	1	0	0	0	0	0	0	0	0	0	0	0	0	0	0	0	0	0	0	0	0	0	0	0	0
YDR496C	1	0	0	0	0	0	0	0	0	0	0	0	0	0	1	0	0	1	0	0	0	0	1	1	1	0	0	0	0	1	0	1	0	0	0	1	0	0	0	0	0	0	0	0	0	0	0	0	0
YDR497C	0	0	0	0	0	0	0	0	0	0	0	0	0	0	1	0	0	0	0	0	0	0	0	0	0	0	1	0	0	1	0	1	0	0	0	0	0	0	0	0	0	0	0	0	0	0	0	0	0
YDR498C	1	0	0	0	0	0	0	0	0	0	1	0	0	0	0	0	0	1	0	0	0	0	0	1	0	0	0	0	0	0	0	0	0	0	0	0	0	0	0	0	0	0	0	0	0	0	0	0	0
YDR499W	1	0	1	0	0	0	0	0	0	0	0	0	0	0	1	0	0	0	0	0	0	0	0	0	1	0	0	0	0	0	0	0	0	0	0	0	0	0	0	0	0	0	0	0	0	0	0	0	0
YDR500C	0	0	0	0	0	0	0	0	0	0	1	0	0	0	1	0	0	1	0	1	1	0	0	1	0	1	0	0	0	0	0	0	0	0	0	0	0	0	0	0	0	0	0	0	0	0	0	0	0
YDR501W	1	0	1	0	0	0	0	0	0	0	0	0	0	0	1	0	0	0	0	0	0	0	0	0	1	0	0	0	0	0	0	0	0	0	0	0	0	0	0	0	0	0	0	0	0	0	0	0	0
YDR502C	0	0	0	0	0	0	0	0	0	0	0	0	0	0	1	0	0	0	0	0	0	0	0	0	1	0	0	0	0	0	0	1	0	0	0	1	0	0	0	0	0	0	0	0	0	0	0	0	0
YDR503C	1	0	0	0	0	0	0	0	0	0	0	0	0	0	1	0	0	0	0	0	1	0	0	0	0	1	0	0	0	0	0	0	0	0	0	0	0	0	0	1	0	0	0	0	0	0	0	0	0
YDR504C	1	0	1	0	0	0	0	0	0	0	0	0	0	0	1	0	0	0	0	0	0	0	0	0	1	0	0	0	0	0	0	1	0	0	0	0	0	0	0	0	0	0	0	1	0	0	0	1	0
YDR505C	1	0	1	0	0	0	0	0	1	0	0	0	0	0	0	0	0	0	0	0	0	0	0	1	1	0	0	0	0	0	0	1	0	0	0	0	0	0	0	0	0	0	0	0	0	0	0	1	0
YDR506C	1	0	0	0	0	0	0	0	1	0	0	0	0	0	1	0	0	0	0	0	0	0	0	0	0	0	0	0	0	0	0	0	0	0	0	1	0	0	0	0	0	0	0	0	1	0	0	0	0
YDR507C	1	0	0	0	0	0	0	0	1	0	0	0	0	0	1	0	0	0	0	0	0	0	1	1	1	0	0	0	0	1	0	1	0	0	0	1	0	0	0	0	0	0	0	0	0	0	0	0	0
YDR508C	0	0	1	0	0	0	0	0	0	0	0	0	0	0	1	0	0	0	0	0	0	0	0	0	0	0	0	0	0	1	0	1	0	0	0	1	0	0	0	0	1	0	0	0	0	0	0	1	0
YDR510W	0	0	0	0	0	0	0	0	0	0	1	0	0	0	1	0	0	1	0	1	1	0	0	1	1	1	0	0	0	0	0	0	0	0	0	0	0	0	0	0	0	0	0	0	0	0	0	0	0
YDR511W	1	0	0	0	0	0	0	0	0	0	0	0	0	0	1	0	0	0	0	0	1	0	0	1	0	0	0	0	0	0	0	0	0	0	0	1	0	0	0	0	0	0	0	0	0	0	0	0	0
YDR512C	0	0	1	0	0	0	0	0	0	0	0	0	0	0	1	0	0	0	0	0	0	0	0	1	1	0	0	0	0	0	0	0	0	0	0	0	0	0	0	0	0	0	0	0	0	0	0	0	0
YDR513W	0	0	0	0	0	0	0	0	0	0	0	0	0	0	0	0	0	1	0	0	1	0	0	1	0	0	0	0	0	0	0	0	0	0	0	0	0	0	0	0	0	0	0	0	0	0	0	1	0
YDR514C	1	0	0	0	0	0	0	0	0	0	0	0	0	0	1	0	0	0	0	0	0	0	0	0	0	0	0	0	0	0	0	1	0	0	0	1	0	0	0	0	0	0	0	0	0	0	0	0	0
YDR515W	1	0	0	0	0	0	0	0	0	0	0	0	0	0	1	0	0	0	0	0	0	0	0	1	1	0	0	0	0	0	0	0	1	0	0	1	0	0	0	0	0	0	0	0	0	0	0	0	0
YDR516C	0	0	0	0	0	0	0	0	0	0	0	0	0	0	0	0	0	1	0	0	0	0	0	1	0	0	0	0	0	0	0	0	0	0	0	0	0	0	0	0	0	0	0	0	0	0	0	0	0
YDR517W	1	0	0	0	0	0	0	0	0	0	0	0	0	0	0	0	0	1	0	0	0	0	0	0	0	1	0	0	0	0	0	0	0	0	0	0	0	0	0	0	0	0	0	0	0	0	0	0	0
YDR518W	0	0	0	0	0	0	0	0	1	0	0	0	0	0	0	0	0	0	0	0	0	0	0	1	0	0	0	0	0	0	0	1	0	0	0	0	0	0	0	0	0	0	0	0	0	0	0	0	0
YDR519W	0	0	0	0	0	0	0	0	0	0	1	0	0	0	0	0	0	0	0	0	1	0	1	1	0	1	0	0	0	0	0	0	0	0	0	1	0	0	0	0	0	0	0	1	0	0	0	0	0
YDR520C	1	0	0	0	0	0	0	0	1	0	0	0	0	0	1	0	0	0	0	0	0	0	0	0	1	0	0	0	0	0	0	0	0	0	0	0	0	0	0	0	0	0	0	0	0	0	0	0	0
YDR522C	0	0	1	0	0	0	0	0	0	0	0	0	0	0	0	0	0	0	0	0	0	0	0	0	0	0	0	0	0	0	0	0	0	0	0	0	0	0	0	0	0	0	0	0	0	0	0	0	0
YDR523C	0	0	1	0	0	0	0	0	1	0	0	0	0	0	0	0	0	0	0	0	0	0	0	0	0	0	0	0	0	0	0	0	0	0	0	0	0	0	0	0	0	0	0	0	1	0	0	0	0
YDR524C	1	0	0	0	0	0	0	0	1	0	0	0	0	0	1	0	0	0	0	0	0	0	0	0	1	0	0	0	0	0	0	0	0	0	0	0	0	0	0	0	0	0	0	0	0	0	0	1	0
YDR524C-B	0	0	0	0	0	0	0	0	0	0	0	1	0	0	1	0	0	0	0	0	1	0	0	1	1	0	0	0	0	1	0	0	1	0	0	0	0	0	0	0	0	0	0	0	0	0	0	1	0
YDR525W-A	0	0	0	0	0	0	0	0	0	0	0	0	0	0	1	0	0	0	0	0	0	0	0	0	0	0	0	0	0	0	0	0	0	0	0	0	0	0	0	0	0	0	0	0	0	0	0	1	0
YDR527W	1	0	0	0	0	0	0	0	0	0	0	0	0	0	1	0	0	0	0	0	1	0	0	1	1	0	0	0	0	0	0	0	0	0	0	0	0	0	0	0	0	0	0	0	0	0	0	0	0
YDR528W	1	0	1	0	0	0	0	0	1	0	0	0	0	0	1	1	0	0	0	0	0	0	0	0	1	0	0	0	0	0	0	0	0	0	0	0	0	0	0	0	0	0	0	0	0	0	0	1	0
YDR529C	1	0	0	0	0	0	0	0	0	0	1	1	0	0	1	0	0	1	0	1	1	0	0	1	0	0	0	0	0	0	0	0	0	0	0	1	0	0	0	1	0	0	0	1	0	0	0	1	0
YDR530C	1	0	0	0	0	0	0	0	0	0	0	0	0	0	1	0	0	1	0	0	1	0	0	1	1	0	1	0	0	0	0	0	0	0	0	0	0	0	0	0	0	0	0	0	1	0	0	0	0
YDR531W	0	0	0	0	0	0	0	0	0	0	0	0	0	0	1	0	0	0	0	0	0	0	0	0	0	0	0	0	0	0	0	1	0	0	0	0	0	0	0	0	0	0	0	0	0	0	0	0	0
YDR532C	1	0	0	0	0	0	0	0	0	0	0	0	0	0	1	0	0	0	0	0	0	0	0	1	1	0	0	0	0	0	0	1	0	0	0	0	0	0	0	0	0	0	0	0	0	0	0	0	0
YDR533C	1	0	0	0	0	0	0	0	0	0	0	0	0	0	0	0	0	0	0	0	1	0	0	1	1	0	0	0	0	0	0	0	0	0	0	0	0	0	0	0	0	0	0	0	0	0	0	1	0
YDR534C	0	0	1	0	0	0	0	0	1	0	0	0	0	0	1	0	0	0	0	0	0	0	0	0	1	0	0	0	0	0	0	0	0	0	0	0	1	0	0	0	0	0	0	0	0	0	0	0	0
YDR536W	0	0	0	0	0	0	0	0	0	0	0	0	0	0	0	0	0	0	0	0	0	0	0	0	0	0	0	0	0	0	0	0	0	0	0	0	1	0	0	0	0	0	0	0	0	0	0	0	0
YDR538W	0	0	0	0	0	0	0	0	0	0	0	0	0	0	0	0	0	1	0	0	0	0	0	0	0	0	0	0	0	0	0	0	0	0	0	0	0	0	0	0	0	0	0	0	0	0	0	1	0
YDR539W	1	0	0	0	0	0	0	0	0	0	0	0	0	0	1	0	0	0	0	0	0	0	0	0	0	0	0	0	0	1	0	1	0	0	0	0	0	0	0	0	0	0	0	0	0	0	0	0	0
YDR540C	0	0	0	0	0	0	0	0	0	0	0	0	0	0	0	0	0	0	0	0	0	0	0	0	0	0	0	0	0	0	0	0	0	0	0	0	0	0	0	0	0	0	0	0	1	0	0	0	0
YDR541C	1	0	0	0	0	0	0	0	1	0	0	0	0	0	1	0	0	0	0	0	0	0	0	0	0	0	1	0	0	0	0	0	0	0	0	0	0	0	0	0	0	0	0	0	0	0	0	1	0
YDR542W	0	0	1	0	0	0	0	0	0	0	0	0	0	0	0	0	0	0	0	0	0	0	0	0	0	0	0	0	0	0	0	0	0	0	0	0	0	0	0	0	0	0	0	0	1	0	0	0	0
YDR545W	0	0	0	0	0	0	0	0	1	0	0	0	0	0	0	0	0	0	0	0	0	0	0	1	0	0	0	0	0	0	0	0	0	0	0	0	0	0	0	0	1	0	0	0	0	0	0	0	0
YEL001C	0	0	0	0	0	0	0	0	0	0	0	0	0	0	1	0	0	0	0	0	1	0	0	1	0	0	0	0	0	0	0	0	0	0	0	0	0	0	0	0	0	0	0	0	0	0	0	1	0
YEL002C	0	0	0	0	0	0	0	0	0	0	0	0	0	0	1	0	0	0	0	0	0	0	0	0	0	0	0	0	0	1	0	1	0	0	0	0	0	0	0	0	0	0	0	0	0	0	0	0	0
YEL003W	0	0	0	0	0	0	0	0	0	0	0	0	0	0	0	0	0	0	0	0	1	0	0	1	0	0	0	0	0	1	0	0	0	0	0	0	0	0	0	0	0	0	0	0	0	0	0	0	0
YEL004W	1	0	0	0	0	0	0	0	0	0	0	0	0	0	1	0	0	0	0	0	0	0	0	0	1	0	0	0	0	0	0	0	0	0	0	0	0	0	0	0	0	0	0	0	0	0	0	0	0
YEL005C	1	0	0	0	0	0	0	0	0	0	0	0	0	0	0	0	0	1	0	0	0	0	0	1	0	0	0	0	0	0	0	0	0	0	0	0	0	0	0	0	0	0	0	0	0	0	0	0	0
YEL006W	0	0	0	0	0	0	0	0	0	0	0	0	0	0	0	0	0	0	0	0	1	0	0	1	0	0	0	0	0	0	0	0	0	0	0	0	0	0	0	0	0	0	0	0	0	0	0	0	0
YEL007W	1	0	1	0	0	0	0	0	1	0	0	0	0	0	1	0	0	0	0	0	0	0	0	0	0	0	0	0	0	0	0	1	0	0	0	1	0	0	0	0	0	0	0	0	0	0	0	1	0
YEL009C	0	0	1	0	0	0	0	0	0	0	0	0	0	0	1	1	0	1	0	1	1	0	0	1	0	0	0	0	0	1	1	0	0	0	0	1	0	0	0	0	0	0	0	0	0	0	0	1	0
YEL011W	1	0	0	0	0	0	0	0	1	0	0	0	0	0	1	0	0	0	0	0	0	0	0	1	0	0	0	0	0	0	0	0	0	0	0	0	0	0	0	0	0	0	0	0	0	0	0	0	0
YEL012W	0	0	0	0	0	0	0	0	0	0	0	0	0	0	0	0	0	0	0	0	0	0	0	1	0	0	0	0	0	0	0	0	0	0	0	1	0	0	0	0	0	0	0	0	0	0	0	0	0
YEL013W	0	0	0	0	0	0	0	0	1	0	0	0	0	0	1	0	0	0	0	0	0	0	0	0	0	0	0	0	0	1	0	1	0	0	0	0	0	0	0	0	0	0	0	0	0	0	0	1	0
YEL015W	0	0	0	0	0	0	0	0	0	0	0	0	0	0	1	0	0	0	0	0	0	0	0	0	0	0	0	0	0	1	0	0	0	0	0	1	0	0	0	0	0	0	0	0	0	0	0	0	0
YEL016C	1	0	0	0	0	0	0	0	1	0	0	0	0	0	1	1	0	0	0	0	0	0	0	0	1	0	0	0	0	0	0	0	0	0	0	0	0	0	0	0	0	0	0	0	1	0	0	0	0
YEL017C-A	0	0	0	0	0	0	0	0	0	0	0	1	0	0	1	0	0	0	0	0	1	0	0	0	0	0	0	0	0	1	0	1	1	1	0	1	0	0	1	0	0	0	0	0	0	0	0	1	0
YEL017W	0	0	1	0	0	0	0	0	0	0	0	0	0	0	0	0	0	0	0	0	1	0	0	0	1	0	0	0	0	0	0	1	0	0	0	0	0	0	0	0	0	0	0	0	0	0	0	1	0
YEL018W	1	0	0	0	0	0	0	0	0	0	0	0	0	0	1	0	0	0	0	0	1	0	0	0	1	0	0	0	0	0	0	0	0	0	0	1	0	0	0	0	0	0	0	0	0	0	0	0	0
YEL019C	1	0	0	0	0	0	0	0	1	0	0	0	0	0	1	0	0	0	0	0	0	0	0	0	0	0	0	0	0	0	0	0	0	0	0	0	0	0	0	0	0	0	0	0	0	0	0	0	0
YEL020C	0	0	0	0	0	0	0	0	1	0	0	0	0	0	0	0	0	0	0	0	0	0	0	1	0	0	0	0	0	0	0	0	0	0	0	0	0	0	0	0	0	0	0	0	1	0	0	0	0
YEL020W-A	0	0	0	0	0	0	0	0	0	0	0	0	0	0	0	0	0	1	0	1	1	0	0	1	1	0	0	0	0	0	0	0	0	0	0	1	0	0	0	0	0	0	0	0	0	0	0	0	0
YEL021W	0	0	0	0	0	0	0	0	0	0	0	0	0	0	0	0	0	0	0	0	0	0	1	1	1	0	0	0	0	0	0	0	0	0	0	0	0	0	0	0	0	0	0	0	0	0	0	0	0
YEL022W	1	0	0	0	0	0	0	0	1	0	0	0	0	0	1	0	0	0	0	0	0	0	0	0	0	0	0	0	0	1	0	1	0	0	0	0	0	0	0	0	0	0	0	0	0	0	0	0	0
YEL023C	0	0	0	0	0	0	0	0	1	0	0	0	0	0	0	1	0	0	0	0	0	0	0	0	0	0	0	0	0	0	0	0	0	0	0	0	0	0	0	0	0	0	0	0	0	0	0	0	0
YEL024W	1	0	0	0	0	0	0	0	0	0	0	0	0	0	1	0	0	1	0	0	0	0	0	0	1	0	0	0	0	0	0	0	0	0	0	1	0	0	0	0	0	0	0	0	0	0	0	1	0
YEL025C	1	0	0	0	0	0	0	0	1	0	0	1	0	0	1	0	0	0	0	0	0	0	0	0	0	0	0	0	0	0	0	0	0	0	0	0	0	0	0	0	0	0	0	0	0	0	0	0	0
YEL026W	0	0	0	0	0	0	0	0	0	0	1	0	0	0	1	0	0	1	0	1	1	0	0	0	1	0	0	0	0	1	0	0	1	0	0	0	0	0	0	0	0	0	0	0	0	0	0	0	0
YEL027W	0	0	0	0	0	0	0	0	0	0	1	0	0	0	1	0	0	0	0	0	1	0	0	1	0	1	0	0	0	1	0	1	0	0	0	0	0	0	0	0	0	0	0	0	0	0	0	0	0
YEL029C	0	0	0	0	0	0	0	0	0	0	0	0	0	0	1	0	0	0	0	0	0	0	0	0	1	0	0	0	0	0	0	0	0	0	0	0	0	0	0	0	0	0	0	0	0	0	0	1	0
YEL030W	0	0	0	0	0	0	0	0	0	0	0	0	0	0	0	0	0	0	0	0	0	0	0	1	0	0	0	0	0	0	0	0	0	0	0	0	0	0	0	0	0	0	0	0	0	0	0	0	0
YEL031W	0	0	0	0	0	0	0	0	1	0	0	1	0	0	1	0	0	0	0	0	0	0	0	0	1	0	0	0	0	0	0	1	0	0	0	0	0	0	0	0	0	0	0	0	0	0	0	1	0
YEL032W	0	0	0	0	0	0	0	0	1	0	0	0	0	0	0	0	0	0	0	0	0	0	0	0	1	0	0	0	0	1	0	0	0	0	0	0	0	0	0	0	0	0	0	0	0	0	0	0	0
YEL033W	0	0	0	0	0	0	0	0	0	0	0	0	0	0	1	0	0	0	0	0	0	0	0	0	1	0	0	0	0	0	0	0	0	0	0	0	0	0	0	0	0	0	0	0	0	0	0	0	0
YEL034W	0	0	0	0	0	0	0	0	0	1	1	1	0	0	1	0	0	0	0	0	1	0	0	1	0	1	0	0	0	1	0	0	1	0	0	1	0	0	0	0	0	0	0	0	0	0	1	1	0
YEL036C	0	0	1	0	0	0	0	0	0	0	0	0	0	0	1	0	0	0	0	0	0	0	0	0	1	0	0	0	0	0	0	0	0	0	0	0	0	0	0	0	1	0	0	0	0	0	0	0	0
YEL037C	0	0	0	0	0	0	0	0	0	1	0	0	0	0	0	0	0	0	0	0	0	0	0	0	1	0	0	0	0	0	0	0	0	0	0	0	0	0	0	0	0	0	0	0	0	0	0	0	0
YEL038W	1	0	0	0	0	0	0	0	0	0	0	0	0	0	0	0	0	0	0	0	1	0	0	1	1	0	0	0	0	0	0	0	0	0	0	0	0	0	0	0	0	0	0	1	0	0	0	1	0
YEL039C	0	0	0	0	0	0	0	0	0	0	0	0	0	0	0	0	0	0	0	0	1	0	0	1	0	1	0	0	0	0	0	0	0	0	0	0	0	0	0	0	0	0	0	0	0	0	0	1	0
YEL040W	0	0	1	0	0	0	0	0	0	0	0	0	0	0	1	0	0	0	0	0	0	0	0	0	1	0	0	0	0	1	0	1	0	0	0	1	0	0	0	0	1	0	0	0	0	0	0	0	0
YEL041W	0	0	0	0	0	0	0	0	0	0	0	0	0	0	0	0	0	0	0	0	0	0	0	1	0	0	0	0	0	0	0	0	0	0	0	0	0	0	0	0	0	0	0	0	0	0	0	0	0
YEL042W	0	0	0	0	0	0	0	0	0	0	0	0	0	0	0	0	0	0	0	0	0	0	1	0	1	0	0	0	0	0	0	1	0	0	0	0	0	0	0	0	0	0	0	0	0	0	0	1	0
YEL043W	0	0	1	0	0	0	0	0	1	0	0	0	0	0	1	0	0	0	0	0	0	0	0	1	0	0	0	0	0	0	0	1	0	0	0	1	0	0	0	0	1	0	0	0	0	0	0	0	0
YEL044W	0	0	0	0	0	0	0	0	0	0	1	0	0	0	0	0	0	1	0	1	1	0	0	1	1	1	0	0	0	0	0	0	0	0	0	0	0	0	0	0	0	0	0	0	0	0	0	0	0
YEL045C	0	0	0	0	0	0	0	0	0	0	0	0	0	0	0	0	0	1	0	0	0	0	0	0	0	0	0	0	0	0	0	0	0	0	0	0	0	0	0	1	0	0	0	0	0	0	0	1	0
YEL046C	1	0	1	0	0	0	0	0	0	0	0	1	0	0	1	0	0	0	0	0	0	0	0	0	0	0	0	0	0	1	0	0	1	0	0	0	0	0	0	0	0	0	0	0	1	0	0	1	0
YEL047C	0	0	0	0	0	0	0	0	0	0	0	0	0	0	0	0	0	0	0	0	0	0	0	1	0	0	0	0	0	0	0	1	0	0	0	0	0	0	0	0	0	0	0	0	0	0	0	0	0
YEL048C	1	0	0	0	0	0	0	0	0	0	0	0	0	0	1	0	0	0	0	0	1	0	0	0	0	0	0	0	0	0	0	0	0	0	0	0	0	0	0	0	0	0	0	0	0	0	0	0	0
YEL049W	0	0	0	0	0	0	0	0	0	0	0	0	0	0	0	0	0	0	0	0	1	0	0	0	0	0	0	0	0	0	0	0	0	0	0	0	0	0	0	0	0	0	0	0	1	0	0	0	0
YEL050C	1	0	0	0	0	0	0	0	0	0	0	0	0	0	1	0	0	0	0	0	0	0	0	0	0	0	0	0	0	0	0	1	0	0	0	1	0	0	0	0	0	0	0	0	0	0	0	0	0
YEL051W	0	0	0	0	0	0	0	0	0	0	1	0	0	0	0	0	0	0	0	1	1	0	0	1	0	1	0	0	0	1	0	0	0	0	0	0	0	0	0	0	0	0	0	0	0	0	0	0	0
YEL052W	1	0	0	0	0	0	0	0	0	0	0	0	0	0	1	0	0	0	0	0	0	0	0	1	0	0	0	0	0	0	0	0	0	0	0	1	0	0	0	0	0	0	0	0	0	0	0	0	0
YEL053C	1	0	0	0	0	0	0	0	1	0	0	0	0	0	0	0	0	0	0	0	0	0	0	0	0	0	0	0	0	0	0	1	0	0	0	1	0	0	0	0	0	0	0	0	0	0	0	0	0
YEL054C	0	0	0	0	0	0	0	0	0	0	1	1	0	0	1	0	0	1	0	1	1	0	1	0	1	0	0	0	0	1	0	0	0	0	0	1	0	0	0	0	0	0	0	0	0	0	0	1	0
YEL055C	0	0	0	0	0	0	0	0	1	0	0	0	0	0	0	0	0	0	0	0	0	0	1	0	1	0	0	0	0	1	0	1	0	0	0	1	0	0	0	0	0	0	0	0	0	0	0	0	0
YEL056W	0	0	1	0	0	0	0	0	0	0	0	0	0	0	1	0	0	0	0	0	0	0	0	1	0	0	0	0	0	0	0	1	0	0	0	0	0	0	0	0	0	0	0	0	0	0	0	0	0
YEL057C	0	0	0	0	0	0	0	0	0	0	0	0	0	0	0	0	0	0	0	0	0	0	0	0	0	0	0	0	0	0	0	0	0	0	0	0	0	0	0	0	0	0	0	0	1	0	0	0	0
YEL058W	0	0	0	0	0	0	0	0	0	0	0	0	0	0	0	0	0	0	0	0	0	0	0	0	0	0	0	0	0	1	0	0	0	0	0	0	0	0	0	0	0	0	0	0	0	0	0	0	0
YEL059C-A	0	0	0	0	0	0	0	0	0	0	0	0	0	0	0	0	0	1	0	0	1	0	0	1	1	0	0	0	0	0	0	0	0	0	0	0	0	0	0	0	0	0	0	0	0	0	0	0	0
YEL060C	1	0	0	0	0	0	0	0	0	0	0	0	0	0	1	0	0	0	0	0	0	0	0	0	1	0	0	0	0	1	0	0	0	0	0	0	0	0	0	0	0	0	0	0	0	0	0	1	0
YEL061C	1	0	0	0	0	0	0	0	0	0	0	0	0	0	1	0	0	0	0	0	0	0	0	1	1	0	0	0	0	0	0	1	0	0	0	1	0	0	0	0	0	0	0	0	0	0	0	0	0
YEL062W	1	0	0	0	0	0	0	0	1	0	0	0	0	0	1	0	0	0	0	0	0	0	0	0	1	0	0	0	0	0	0	0	0	0	0	0	0	0	0	0	0	0	0	0	0	0	0	0	0
YEL063C	1	0	0	0	0	0	0	0	1	0	0	0	0	0	0	0	0	0	0	0	0	0	0	0	0	0	0	0	0	0	0	1	0	0	0	1	0	0	0	0	1	0	0	0	1	0	0	1	0
YEL064C	1	0	0	0	0	0	0	0	1	0	0	0	0	0	1	0	0	0	0	0	0	0	0	0	0	0	0	0	0	0	0	1	0	0	0	0	0	0	0	0	0	0	0	0	0	0	0	0	0
YEL065W	1	0	0	0	0	0	0	0	1	0	0	0	0	0	1	0	0	0	0	0	0	0	0	0	0	0	0	0	0	0	0	1	0	0	0	1	0	0	0	0	0	0	0	0	1	0	0	1	0
YEL066W	0	0	0	0	0	0	0	0	0	0	1	0	0	0	0	0	0	1	0	1	1	0	0	1	0	0	0	0	0	0	0	0	0	0	0	0	0	0	0	0	0	0	0	0	0	0	0	0	0
YEL067C	1	0	0	0	0	0	0	0	0	0	0	0	0	0	0	0	0	0	0	0	0	0	0	0	0	0	0	0	0	0	0	0	0	0	0	0	0	0	0	0	0	0	0	0	0	0	0	0	0
YEL069C	0	0	0	0	0	0	0	0	1	0	0	0	0	0	0	0	0	0	0	0	0	0	0	0	0	0	0	0	0	0	0	0	0	0	0	0	0	0	0	0	0	0	0	0	0	0	0	0	0
YEL071W	0	0	0	0	0	0	0	0	0	0	0	0	0	0	1	0	0	0	0	0	0	0	0	0	0	0	0	0	0	1	0	1	0	0	0	0	0	0	0	0	0	0	0	0	0	0	0	1	0
YEL072W	1	0	0	0	0	0	0	0	0	0	0	0	0	0	1	0	0	0	0	0	0	0	0	0	1	0	0	0	0	0	0	0	0	0	0	0	0	0	0	0	0	0	0	0	1	0	0	0	0
YEL073C	1	0	0	0	0	0	0	0	0	0	1	0	0	0	0	0	0	0	0	0	0	0	0	1	0	0	0	0	0	0	0	0	0	0	0	0	0	0	0	0	0	0	0	0	1	0	0	0	0
YEL074W	0	0	1	0	0	0	0	0	0	0	0	0	0	0	0	0	0	0	0	0	0	0	0	0	0	0	0	0	0	0	0	0	0	0	0	0	0	0	0	0	1	0	0	0	0	0	0	1	0
YEL075C	0	0	1	0	0	0	0	0	1	0	0	0	0	0	0	0	0	0	0	0	0	0	0	0	0	0	1	0	0	0	0	0	0	0	0	0	0	1	0	1	1	0	0	0	0	0	0	0	0
YEL075W-A	0	0	0	0	0	0	0	0	0	0	0	0	0	0	0	0	0	0	0	0	1	0	0	0	0	0	0	0	0	0	0	0	0	0	0	0	0	0	0	0	0	0	0	0	0	0	0	1	0
YEL076C	0	0	1	0	0	0	0	0	1	0	0	0	0	0	0	0	0	0	0	0	0	0	0	0	0	0	0	0	0	0	0	0	0	0	0	0	0	0	0	0	1	0	0	0	0	0	0	0	0
YEL076C-A	0	0	1	0	0	0	0	0	1	0	0	0	0	0	0	0	0	0	0	0	0	0	0	0	1	0	0	0	0	0	0	0	0	0	0	0	0	0	0	1	1	0	0	0	0	0	0	0	0
YEL076W-C	0	0	1	0	0	0	0	0	0	0	0	0	0	0	0	0	0	0	0	0	0	0	0	0	0	0	0	0	0	0	0	0	0	0	0	0	0	0	0	0	0	0	0	0	0	0	0	0	0
YEL077C	0	0	0	0	0	0	0	0	1	0	0	0	0	0	0	0	0	0	0	0	0	0	0	1	0	0	0	0	0	0	0	0	0	0	0	0	0	0	0	0	1	0	0	0	0	0	0	0	0
YER001W	0	0	0	0	0	0	0	0	1	0	0	0	0	0	1	0	0	0	0	0	0	0	0	0	0	0	0	0	0	1	0	0	0	0	0	1	0	0	0	0	0	0	0	0	0	0	0	0	1
YER002W	0	0	0	0	0	0	0	0	0	1	0	0	0	0	1	0	0	0	0	0	0	0	0	0	1	0	0	0	0	0	0	1	0	0	0	0	0	0	0	0	0	0	0	0	0	0	0	0	0
YER003C	0	0	0	0	0	0	0	0	0	0	0	0	0	0	1	0	0	0	0	0	0	0	0	1	0	0	0	0	0	1	0	1	0	0	0	0	0	0	0	0	0	0	0	0	0	0	0	1	0
YER004W	1	0	0	0	0	0	0	0	0	0	0	0	0	0	1	0	0	1	0	0	0	0	0	0	1	1	0	0	0	0	0	0	0	0	0	0	0	0	0	0	0	0	0	1	1	0	0	1	0
YER005W	1	0	0	0	0	0	0	0	1	0	0	0	0	0	0	0	0	0	0	0	0	0	0	1	0	0	0	0	0	0	0	0	0	0	0	0	0	0	0	0	0	0	0	0	0	0	0	1	0
YER006W	0	0	0	0	0	0	0	0	0	1	0	0	0	0	1	0	0	0	0	0	0	0	1	0	0	0	0	0	0	0	1	1	0	0	0	0	0	0	0	0	0	0	0	0	0	0	0	0	0
YER007C-A	0	0	0	0	0	0	0	0	0	0	0	1	0	0	0	0	0	1	0	0	1	0	0	0	0	0	0	0	0	0	0	0	0	0	0	0	0	0	0	0	0	0	0	0	0	0	0	0	0
YER007W	0	0	0	0	0	0	0	0	1	0	0	1	0	0	0	0	0	0	0	0	1	0	0	0	1	0	0	0	0	0	0	0	0	0	0	0	0	0	0	0	0	0	0	0	0	0	0	0	0
YER008C	1	0	0	0	0	0	0	0	1	0	0	1	0	0	1	0	0	0	0	0	0	0	0	0	0	0	0	0	0	1	0	1	0	0	1	1	0	0	0	0	0	0	0	0	0	0	0	0	0
YER009W	0	0	0	0	0	0	0	0	0	0	0	0	0	0	1	0	0	0	0	1	1	0	0	1	0	0	0	0	0	1	0	0	0	0	1	0	0	0	1	0	0	0	0	0	0	0	0	0	0
YER010C	1	0	0	0	0	0	0	0	0	0	0	0	0	0	0	0	0	1	0	1	1	0	0	1	0	1	0	0	0	0	0	0	1	0	0	0	0	0	0	0	0	0	0	0	0	0	0	1	0
YER011W	1	0	0	0	0	0	0	0	0	0	0	0	0	0	1	0	0	0	0	0	0	0	0	0	0	0	0	0	0	0	0	0	0	0	0	0	0	0	0	0	0	0	0	0	0	0	0	1	0
YER012W	0	0	0	0	0	0	0	0	0	0	0	0	0	0	1	0	0	0	0	0	1	0	0	1	1	0	0	0	0	1	0	0	0	0	0	0	0	0	0	0	0	0	0	0	0	0	0	1	0
YER013W	1	0	0	0	0	0	0	0	1	0	0	0	0	0	1	0	0	0	0	0	0	0	0	1	0	0	0	0	0	0	0	0	0	0	0	1	0	0	0	0	0	0	0	0	0	0	0	0	0
YER014C-A	0	0	0	0	0	0	0	0	1	0	0	0	0	0	0	0	0	0	0	0	0	0	0	0	0	0	0	0	0	0	0	0	0	0	0	0	0	0	0	0	0	0	0	0	0	0	0	0	0
YER014W	0	0	0	0	0	0	0	0	0	0	0	0	0	0	0	0	0	0	0	0	0	0	0	1	0	0	0	0	0	1	0	0	0	0	0	0	0	0	0	0	0	0	0	0	0	0	0	0	0
YER015W	0	0	0	0	0	0	0	0	0	0	0	0	0	0	0	0	0	1	0	0	0	0	0	0	0	0	0	0	0	0	0	0	0	0	0	0	0	0	0	0	0	0	0	0	0	0	0	0	0
YER016W	1	0	0	0	0	0	0	0	0	0	0	0	0	0	1	0	0	0	0	0	0	0	0	0	1	0	0	0	0	0	0	0	0	0	0	0	0	0	0	0	0	0	0	0	0	0	0	0	0
YER017C	1	0	0	0	0	0	0	0	0	0	0	0	0	0	1	0	0	0	0	0	0	0	0	0	0	0	0	0	0	0	0	1	0	0	0	1	0	0	0	0	0	0	0	0	0	0	0	0	0
YER018C	1	0	1	0	0	0	0	0	0	0	1	0	0	0	1	0	0	1	0	1	1	0	0	0	0	1	0	0	0	0	0	0	0	0	0	1	0	0	0	0	0	0	0	0	0	0	0	1	0
YER019C-A	1	0	0	0	0	0	0	0	0	0	1	0	0	0	1	0	0	1	0	1	1	0	0	1	1	1	0	0	0	0	0	0	0	0	0	0	0	0	0	0	0	0	0	0	0	0	0	0	0
YER019W	1	0	0	0	0	0	0	0	0	0	0	0	0	0	0	0	0	1	0	0	0	0	0	0	1	0	0	0	0	0	0	0	0	0	0	0	0	0	0	0	0	0	0	0	0	0	0	0	0
YER020W	1	0	0	0	0	0	0	0	0	0	0	0	0	0	0	0	0	0	0	0	0	0	0	1	1	0	1	0	0	0	0	0	0	0	0	0	0	0	0	0	0	0	0	0	0	0	0	0	0
YER021W	0	0	0	0	0	0	0	0	1	0	0	0	0	0	1	0	0	0	0	0	0	0	0	1	0	0	1	0	0	1	0	1	0	0	0	0	0	0	0	0	0	0	0	0	0	0	0	0	0
YER022W	1	0	0	0	0	0	0	0	0	0	0	0	0	0	1	0	0	0	0	0	0	0	0	1	0	0	0	0	0	0	0	1	0	0	0	0	0	0	0	0	1	0	0	0	0	0	0	0	0
YER023W	0	0	0	0	0	0	0	0	0	0	1	0	0	0	1	0	0	0	0	0	0	0	0	1	1	1	0	0	0	0	0	0	0	0	0	0	0	0	0	0	0	0	0	0	0	0	0	1	0
YER024W	0	0	0	0	0	0	0	0	1	0	0	0	0	0	0	0	0	0	0	0	0	0	0	1	0	0	0	0	0	0	0	0	0	0	0	0	0	0	0	0	0	0	0	0	1	0	0	0	0
YER025W	0	0	0	0	0	0	0	0	0	0	0	0	0	0	1	0	0	0	0	0	0	0	1	0	0	0	0	0	0	1	0	1	0	0	0	0	0	0	0	0	0	0	0	0	0	0	0	0	0
YER026C	0	0	0	0	0	0	0	0	0	0	0	0	0	0	1	0	0	0	0	0	1	0	1	0	1	0	0	0	0	0	0	0	0	0	0	1	0	0	0	0	0	0	0	0	0	0	0	1	0
YER027C	0	0	0	0	0	0	0	0	0	0	0	0	0	0	0	0	0	0	0	0	0	0	0	1	0	0	0	0	0	0	0	1	0	0	0	0	0	0	0	0	0	0	0	0	0	0	0	0	0
YER028C	1	0	0	0	0	0	0	0	0	0	0	0	0	0	1	0	0	1	0	0	0	0	0	0	0	0	0	0	0	0	0	0	0	0	0	0	0	0	0	0	0	0	0	0	1	0	0	0	0
YER029C	1	0	0	0	0	0	0	0	0	0	1	0	0	0	1	0	0	0	0	0	0	0	0	1	1	0	0	0	0	0	0	0	0	0	0	0	0	0	0	0	0	0	0	0	0	0	0	0	0
YER030W	0	0	0	0	0	0	0	0	0	0	1	0	0	0	1	0	0	0	0	0	1	0	1	1	1	0	0	0	0	1	0	0	0	0	0	1	0	0	0	0	0	0	0	0	0	0	0	0	0
YER031C	0	0	0	0	0	0	0	0	0	0	1	0	0	0	1	0	0	0	0	1	1	0	0	0	0	1	0	0	0	0	0	0	0	0	0	1	0	0	0	0	0	0	0	0	0	0	0	0	0
YER032W	1	0	0	0	0	0	0	0	0	0	0	0	0	0	1	0	0	0	0	0	1	0	1	0	1	0	0	0	0	0	0	1	0	0	0	0	0	0	0	0	0	0	0	0	1	0	0	1	0
YER033C	1	0	0	0	0	0	0	0	0	0	0	0	0	0	0	0	0	0	0	0	0	0	0	0	0	0	0	0	0	0	0	1	0	0	0	0	0	0	0	0	0	0	0	0	0	0	0	1	0
YER034W	1	0	0	0	0	0	0	0	0	0	0	0	0	0	1	0	0	0	0	0	0	0	0	0	0	0	0	0	0	0	0	0	0	0	0	0	0	0	0	0	0	0	0	0	0	0	0	1	0
YER035W	1	0	0	0	0	0	0	0	0	0	0	0	0	0	1	0	0	0	0	0	0	0	0	0	0	0	0	0	0	0	0	0	0	0	0	0	0	0	0	0	0	0	0	0	0	0	0	1	0
YER036C	1	0	0	0	0	0	0	0	0	0	0	1	0	0	1	0	0	0	0	0	0	0	1	0	1	0	0	0	0	1	0	1	0	0	0	0	0	0	0	0	0	0	0	0	0	0	0	0	0
YER037W	1	0	0	0	0	0	0	0	0	0	0	0	0	0	1	0	0	1	0	0	0	0	0	1	1	0	0	0	0	0	0	0	0	0	0	0	0	0	0	0	0	0	0	0	0	0	0	0	0
YER038C	0	0	0	0	0	0	0	0	0	0	0	0	0	0	0	0	0	0	0	0	0	0	1	1	1	0	0	0	0	0	0	0	0	0	0	1	0	0	0	0	0	0	0	0	0	0	0	0	0
YER039C	1	0	1	0	0	0	0	0	0	0	0	0	0	0	0	0	0	0	0	0	0	0	0	0	0	0	0	0	0	0	0	0	0	0	0	0	0	0	0	0	0	0	0	0	1	0	0	0	0
YER040W	1	0	1	0	0	0	0	0	1	0	0	0	0	0	1	0	0	0	0	0	0	0	0	0	1	0	0	0	0	0	0	0	0	0	0	1	0	0	0	0	0	0	0	0	0	0	0	0	0
YER041W	1	0	0	0	0	0	0	0	1	0	0	0	0	0	0	0	0	0	0	0	0	0	0	0	0	0	0	0	0	0	0	0	0	0	0	0	0	0	0	0	1	0	0	0	1	0	0	0	0
YER042W	0	0	0	0	0	0	0	0	0	0	1	0	0	0	1	0	0	0	0	0	1	0	0	1	0	0	0	0	0	0	0	0	0	0	0	0	0	0	0	0	0	0	0	0	0	0	0	0	0
YER043C	0	0	0	0	0	0	0	0	0	0	0	1	0	0	1	0	0	0	0	0	0	0	1	0	1	0	0	0	0	1	0	0	1	0	0	1	0	0	0	0	0	0	0	0	0	0	0	0	0
YER044C	0	0	0	0	0	0	0	0	0	0	1	0	0	0	1	0	0	1	0	1	1	0	0	1	0	0	0	0	0	0	0	0	0	0	0	1	0	0	0	0	0	0	0	0	0	0	0	1	0
YER045C	1	0	1	0	0	0	0	0	1	0	0	0	0	0	0	1	0	0	0	0	0	0	0	1	1	0	0	0	0	0	0	0	0	0	0	0	0	0	0	0	0	0	0	0	1	0	0	1	0
YER046W	0	0	0	0	0	0	0	0	0	0	0	0	0	0	0	0	0	0	0	0	0	0	0	0	0	0	0	0	0	0	0	0	0	0	0	0	0	0	0	0	0	0	0	0	0	0	0	0	0
YER047C	1	0	0	0	0	0	0	0	0	0	0	0	0	0	1	0	0	0	0	0	0	0	0	0	0	0	0	0	0	0	0	0	0	0	0	0	0	0	0	0	0	0	0	0	0	0	0	0	0
YER048C	0	0	0	0	0	0	0	0	0	0	1	0	0	0	1	0	0	0	0	0	0	0	1	0	1	1	0	0	0	0	0	1	0	0	0	1	0	0	0	0	0	0	0	0	0	0	0	0	0
YER048W-A	0	0	0	0	0	0	0	0	0	0	0	0	0	0	0	0	0	1	0	0	1	0	0	1	0	0	0	0	0	0	0	0	0	0	0	1	0	0	0	0	0	0	0	0	0	0	0	1	0
YER049W	0	0	0	0	0	0	0	0	0	0	0	0	0	0	1	0	0	0	0	0	0	0	1	0	1	0	0	0	0	0	0	1	0	0	0	0	0	0	0	0	0	0	0	0	0	0	0	0	0
YER050C	1	0	0	0	0	0	0	0	0	0	0	0	0	0	1	0	0	1	0	0	1	0	0	1	1	1	0	0	0	0	0	0	0	0	0	1	0	0	0	0	0	0	0	0	0	0	0	0	0
YER051W	1	0	0	0	0	0	0	0	1	0	0	0	0	0	1	0	0	0	0	0	0	0	0	1	1	0	0	0	0	0	0	0	0	0	0	0	0	0	0	0	0	0	0	0	0	0	0	0	0
YER052C	0	0	0	0	0	0	0	0	1	0	0	0	0	0	1	0	0	0	0	0	0	0	0	0	0	0	0	0	0	0	0	1	0	0	0	0	0	0	0	0	0	0	0	0	0	0	0	1	0
YER053C	1	0	1	0	0	0	0	0	0	0	0	0	0	0	1	0	0	1	0	0	1	0	0	1	0	0	0	0	0	0	0	0	0	0	0	0	0	0	0	0	0	0	0	0	0	0	0	1	0
YER053C-A	0	0	0	0	0	0	0	0	0	0	0	0	0	0	0	0	0	0	0	0	0	0	0	0	0	0	0	0	0	0	0	0	0	0	0	0	0	0	0	0	0	0	0	0	0	0	0	0	0
YER054C	0	0	1	0	0	0	0	0	1	0	0	0	0	0	0	0	0	0	0	0	0	0	0	1	0	0	0	0	0	0	0	0	0	0	0	1	0	0	0	0	0	0	0	0	0	0	0	0	0
YER055C	0	0	0	0	0	0	0	0	0	0	1	0	0	0	1	0	0	0	0	1	1	0	0	1	0	0	0	0	0	1	0	0	0	0	0	0	0	0	0	0	0	0	0	0	0	0	0	0	0
YER056C	0	0	0	0	0	0	0	0	0	0	0	1	0	0	1	0	0	0	0	0	0	0	1	0	1	0	0	0	0	0	0	1	0	0	0	1	0	0	0	0	0	0	0	0	0	0	0	1	0
YER056C-A	0	0	0	0	0	0	0	0	0	0	1	0	0	0	1	0	0	1	0	1	1	0	1	1	1	1	0	0	0	1	0	0	0	0	0	1	0	0	1	0	0	0	0	0	0	0	0	0	0
YER057C	0	0	0	0	0	0	0	0	0	0	1	0	0	0	1	0	0	1	0	1	1	0	0	1	1	1	0	0	0	0	0	0	0	0	0	0	0	0	0	0	0	0	0	0	0	0	0	0	0
YER058W	1	0	0	0	0	0	0	0	0	0	0	0	0	0	1	0	0	0	0	0	1	0	0	1	1	1	0	0	0	0	0	0	0	0	0	1	0	0	0	0	0	0	0	0	0	0	0	0	0
YER059W	1	0	0	1	0	0	0	0	0	0	0	0	0	0	0	0	0	0	0	0	0	0	0	1	0	0	0	0	0	0	0	0	0	0	0	1	0	0	0	0	0	0	0	0	0	0	0	0	0
YER060W	0	0	1	0	0	0	0	0	0	0	0	0	0	0	0	0	0	0	0	0	0	0	1	0	0	0	0	0	0	0	0	0	0	0	0	0	0	0	0	0	0	0	0	0	0	0	0	1	0
YER060W-A	0	0	1	0	0	0	0	0	0	0	0	0	0	0	1	0	0	0	0	0	1	0	1	0	0	0	0	0	0	0	0	1	0	0	0	0	0	0	0	0	0	0	0	0	0	0	0	1	0
YER061C	1	0	0	0	0	0	0	0	0	0	0	0	0	0	0	0	0	0	0	0	0	0	0	0	0	0	0	0	0	0	0	0	0	0	0	1	0	0	0	0	0	0	0	0	0	0	0	0	0
YER062C	1	0	0	0	0	0	0	0	0	0	1	0	0	0	1	0	0	0	0	0	1	0	0	0	0	0	0	0	0	0	0	0	0	0	0	0	0	0	0	0	0	0	0	0	0	0	0	0	0
YER063W	1	0	0	0	0	0	0	0	0	0	1	0	0	0	1	0	0	0	0	0	1	0	1	1	1	0	0	0	0	0	0	0	0	0	0	0	0	0	0	0	0	0	0	0	0	0	0	0	0
YER064C	1	0	0	0	0	0	0	0	0	0	0	0	0	0	1	1	0	0	0	0	0	0	0	1	0	0	0	0	0	1	0	1	0	0	0	0	0	0	0	0	0	0	0	0	1	0	0	1	0
YER065C	1	0	0	0	0	0	0	0	1	0	0	0	0	0	0	0	0	0	0	0	0	0	0	0	0	0	0	0	0	0	0	0	0	0	0	0	0	0	0	0	0	0	0	0	1	0	0	0	0
YER066W	0	0	0	0	0	0	0	0	1	0	0	0	0	0	0	0	0	0	0	0	0	0	0	1	0	0	0	0	0	0	0	0	0	0	0	0	0	0	0	0	0	0	0	0	1	0	0	0	0
YER067W	1	0	0	1	0	0	0	0	0	0	1	0	0	0	1	0	0	0	0	0	1	0	0	1	1	0	0	0	0	1	0	0	0	0	0	0	0	0	0	0	0	0	0	0	0	0	0	0	0
YER068W	1	0	1	0	0	0	0	0	0	0	0	0	0	0	1	0	0	0	0	0	0	0	0	0	0	0	0	0	0	1	0	1	0	0	0	0	0	0	0	0	0	0	0	0	0	0	0	1	0
YER069W	1	0	0	0	0	0	0	0	0	0	0	0	0	0	1	0	0	0	0	0	0	0	0	1	0	0	0	0	0	0	0	0	0	0	0	0	0	0	0	0	1	0	0	0	0	0	0	0	0
YER070W	1	0	1	0	0	0	0	0	1	0	0	1	0	0	1	0	0	0	0	0	0	0	1	0	1	0	0	0	0	0	0	1	1	1	0	1	0	0	0	0	0	0	0	0	0	0	0	1	0
YER071C	0	0	0	0	0	0	0	0	0	0	1	0	0	0	0	0	0	0	0	0	1	0	0	1	0	0	0	0	0	0	0	0	0	0	0	0	0	0	0	0	0	0	0	0	0	0	0	0	0
YER072W	0	0	0	0	0	0	0	0	0	0	1	1	0	0	1	0	0	1	0	1	1	0	0	1	1	0	0	0	0	0	0	0	0	0	0	1	0	0	0	0	0	0	0	0	0	0	0	0	0
YER073W	0	0	0	0	0	0	0	0	0	0	0	0	0	0	1	0	0	0	0	0	0	0	0	0	0	0	0	0	0	1	0	0	0	0	0	0	0	0	0	0	0	0	0	0	0	0	0	0	0
YER074W	0	0	0	0	0	0	0	0	0	0	1	1	0	0	0	0	0	0	0	1	1	0	0	1	1	0	0	0	0	1	0	0	1	0	0	1	0	0	0	0	0	0	0	0	0	0	0	1	0
YER074W-A	0	0	0	0	0	0	0	0	0	0	0	0	0	0	0	0	0	0	0	0	0	0	0	1	0	0	0	0	0	0	0	0	0	0	0	0	0	0	0	0	0	0	0	0	0	0	0	0	0
YER075C	1	0	1	0	0	0	0	0	1	0	0	0	0	0	1	0	0	0	0	0	0	0	0	0	0	0	0	0	0	0	0	0	0	0	0	0	0	0	0	0	0	0	0	0	0	0	0	0	0
YER076C	1	0	0	0	0	0	0	0	0	0	0	0	0	0	1	0	0	0	0	0	0	0	0	0	0	0	0	0	0	0	0	0	0	0	0	1	0	0	0	0	0	0	0	0	1	0	0	0	0
YER077C	1	0	0	0	0	0	0	0	1	0	0	0	0	0	1	0	0	0	0	0	0	0	0	1	0	0	0	0	0	0	0	0	0	0	0	1	0	0	0	0	0	0	0	0	0	0	0	0	0
YER078C	1	0	0	0	0	0	0	0	0	0	0	0	0	0	1	0	0	0	0	0	0	0	0	0	0	0	0	0	0	0	0	1	0	0	0	1	0	0	0	0	0	0	0	0	0	0	0	0	0
YER079W	1	0	0	0	0	0	0	0	0	0	0	0	0	0	1	0	0	1	0	0	0	0	0	1	0	0	0	0	0	0	0	1	0	0	0	0	0	0	0	0	0	0	0	0	0	0	0	0	0
YER080W	0	0	0	0	0	0	0	0	0	0	0	0	0	0	1	0	0	0	0	0	0	0	1	0	0	0	0	0	0	1	0	1	0	0	0	0	0	0	0	0	0	0	0	0	0	0	0	1	0
YER081W	1	0	0	0	0	0	0	0	0	0	0	0	0	0	1	0	0	0	0	0	0	0	0	1	0	0	0	0	0	1	0	0	0	0	0	0	0	0	0	0	0	0	0	0	0	0	0	0	0
YER082C	0	0	0	0	0	0	0	0	0	0	0	0	0	0	1	0	0	0	0	0	1	0	0	1	0	0	0	0	0	1	0	1	0	0	0	1	0	0	0	0	0	0	0	0	0	0	0	0	0
YER083C	1	0	0	0	0	0	0	0	0	0	0	0	0	0	1	0	0	1	0	0	1	0	0	0	0	0	0	0	0	0	0	0	0	0	0	0	0	0	0	0	0	0	0	0	0	0	0	1	0
YER085C	0	0	1	0	0	0	0	0	0	0	0	0	0	0	0	0	0	0	0	0	0	0	0	0	0	0	0	0	0	0	0	0	0	0	0	0	0	0	0	0	0	0	0	0	0	0	0	0	0
YER086W	0	0	1	0	0	0	0	0	0	0	0	0	0	0	1	0	0	0	0	0	0	0	0	0	0	0	0	0	0	0	0	1	0	0	0	0	0	0	0	0	0	0	0	0	0	0	0	0	0
YER087C-A	0	0	1	0	0	0	0	0	0	0	0	0	0	0	0	0	0	0	0	0	0	0	0	0	0	0	0	0	0	0	0	0	0	0	0	0	0	0	0	0	0	0	0	0	0	0	0	0	0
YER087C-B	0	0	1	0	0	0	0	0	0	0	0	0	0	0	1	0	0	1	0	0	1	0	0	1	1	1	0	0	0	0	0	0	0	0	0	1	0	0	0	0	0	0	0	0	0	0	0	1	0
YER087W	1	0	0	0	0	0	0	0	0	0	0	0	0	0	0	0	0	0	0	0	0	0	1	1	0	0	0	0	0	0	0	0	0	0	0	1	0	0	0	0	0	0	0	0	0	0	0	0	0
YER088C	0	0	0	0	0	0	0	0	1	0	0	0	0	0	0	0	0	0	0	0	0	0	0	0	1	0	0	0	0	0	0	0	0	0	0	0	0	0	0	0	0	0	0	0	0	0	0	0	0
YER089C	0	0	0	0	0	0	0	0	0	0	0	0	0	0	1	0	0	1	0	0	0	0	1	0	1	1	0	0	0	0	0	0	0	0	0	0	0	0	0	0	1	0	0	0	0	0	1	0	0
YER090W	1	0	0	0	0	0	0	0	0	0	1	0	0	0	1	0	0	0	0	0	0	0	0	1	0	0	0	0	0	0	0	1	0	0	0	1	0	0	0	0	0	0	0	0	0	0	0	0	0
YER091C	0	0	0	0	0	0	0	0	0	0	0	1	0	0	1	0	0	0	0	0	0	0	0	0	1	0	0	0	0	1	0	0	0	0	0	1	0	0	0	0	0	0	0	0	0	0	0	1	0
YER092W	1	0	0	0	0	0	0	0	0	0	0	0	0	0	1	0	0	1	0	1	1	0	0	1	1	1	0	0	0	0	0	0	0	0	0	0	0	0	0	0	0	0	0	0	1	0	0	1	0
YER093C	1	0	0	0	0	0	0	0	0	0	0	0	0	0	1	0	0	0	0	0	0	0	0	1	0	0	0	0	0	0	0	0	0	0	0	1	0	0	0	0	0	0	0	0	0	0	0	0	0
YER093C-A	1	0	0	0	0	0	0	0	0	0	0	0	0	0	1	0	0	0	0	0	1	0	0	1	1	0	0	0	0	0	0	0	0	0	0	1	0	0	0	0	0	0	0	0	0	0	0	1	0
YER094C	1	0	0	0	0	0	0	0	0	0	1	0	0	0	1	0	0	1	0	0	1	0	0	1	0	1	0	0	0	1	0	0	0	0	0	0	0	0	0	0	0	0	0	0	0	0	0	0	0
YER095W	1	0	0	0	0	0	0	0	0	0	0	0	0	0	1	0	0	0	0	0	0	0	0	0	1	0	0	0	0	0	0	0	0	0	0	0	0	0	0	0	0	0	0	0	0	0	0	1	0
YER096W	0	0	0	0	0	0	0	0	0	0	1	0	0	0	0	0	0	0	0	0	0	0	0	0	0	0	0	0	0	0	0	0	0	0	0	0	0	0	0	0	0	0	0	0	0	0	0	0	0
YER098W	1	0	0	0	0	0	0	0	1	0	0	0	0	0	1	0	0	0	0	0	0	0	0	0	1	0	0	0	0	0	0	0	0	0	0	0	0	0	0	0	0	0	0	0	0	0	0	0	0
YER099C	0	0	0	0	0	0	0	0	0	0	1	0	0	0	0	0	0	0	0	0	1	0	0	0	0	0	0	0	0	0	0	0	0	0	0	0	0	0	0	0	0	0	0	0	0	0	0	0	0
YER100W	0	0	0	0	0	0	0	0	0	0	0	0	0	0	0	0	0	0	0	0	1	0	0	1	0	0	0	0	0	0	0	0	0	0	0	0	0	0	0	0	0	0	0	0	0	0	0	0	0
YER101C	1	0	0	0	0	0	0	0	0	0	0	0	0	0	0	0	0	0	0	0	0	0	0	0	0	0	0	0	0	0	0	0	0	0	0	0	0	0	0	0	0	0	0	0	0	0	0	0	0
YER102W	0	0	0	0	0	0	0	0	0	0	1	0	0	0	1	0	0	0	0	0	1	0	0	0	0	0	0	0	0	0	0	0	0	0	0	1	0	0	0	0	0	0	0	0	0	0	0	1	0
YER103W	1	0	0	0	0	0	0	0	0	0	0	0	0	0	1	0	0	0	0	0	0	0	0	1	0	0	0	0	0	0	0	0	0	0	0	1	0	0	0	0	0	0	0	0	0	0	0	0	0
YER104W	0	0	0	0	0	0	0	0	0	0	1	0	0	0	0	0	0	0	0	0	1	0	0	1	0	0	0	0	0	0	0	0	0	0	0	0	0	0	0	0	0	0	0	0	1	0	0	0	0
YER105C	0	0	0	0	0	0	0	0	1	0	0	0	0	0	0	0	0	0	0	0	0	0	0	0	0	0	0	0	0	1	0	1	0	0	0	0	0	0	0	0	0	0	0	0	0	0	0	0	0
YER107C	1	0	0	0	0	0	0	0	0	0	0	0	0	0	0	0	0	0	0	0	0	0	0	1	0	0	0	0	0	0	0	0	0	0	0	1	0	0	0	0	0	0	0	0	0	0	0	0	0
YER109C	1	0	1	0	0	0	0	0	1	0	0	0	0	0	1	0	0	0	0	0	0	0	0	0	1	0	0	0	0	0	0	0	0	0	0	0	0	0	0	0	0	0	0	0	1	0	0	0	0
YER110C	0	0	0	0	0	0	0	0	1	0	0	1	0	0	1	0	0	0	0	0	0	0	1	0	1	0	0	0	0	1	0	1	0	1	0	0	0	0	0	0	0	0	0	0	0	0	0	1	0
YER111C	1	0	1	0	0	0	0	0	0	0	0	0	0	0	1	0	0	0	0	0	0	0	0	1	0	0	0	0	0	0	0	0	0	0	0	0	0	0	0	0	0	0	0	0	0	0	0	0	0
YER112W	0	0	1	0	0	0	0	0	0	0	0	0	0	0	1	0	0	1	0	1	1	0	0	0	1	0	0	0	0	1	0	0	0	0	0	0	0	0	0	0	0	0	0	0	0	0	0	0	0
YER113C	1	0	0	0	0	0	0	0	1	0	0	0	0	0	1	0	0	0	0	0	0	0	0	0	0	0	0	0	0	0	0	1	0	0	0	0	0	0	0	0	0	0	0	0	0	0	0	1	0
YER114C	1	0	0	0	0	0	0	0	1	0	0	0	0	0	1	0	0	0	0	0	0	0	0	0	1	0	0	0	0	0	0	1	0	0	0	0	0	0	0	0	0	0	0	0	1	0	0	0	0
YER115C	0	0	0	0	0	0	0	0	0	0	0	0	0	0	0	0	0	0	0	0	1	0	0	1	0	0	0	0	0	0	0	0	0	0	0	0	0	0	0	0	0	0	0	0	1	0	0	0	0
YER116C	1	0	0	0	0	0	0	0	0	0	0	0	0	0	0	0	0	0	0	0	0	0	0	0	0	0	0	0	0	0	0	0	0	0	0	1	0	0	0	0	0	0	0	0	0	0	0	0	0
YER117W	0	0	0	0	0	0	0	0	0	0	1	0	0	0	1	0	0	0	0	1	1	0	1	1	1	1	0	0	0	0	0	0	1	0	0	0	0	0	0	0	0	0	0	0	0	0	0	0	0
YER118C	1	0	1	0	0	0	0	0	0	0	0	0	0	0	1	1	0	0	0	0	0	0	1	0	1	0	1	0	0	0	0	1	0	0	0	0	0	0	0	0	0	0	0	0	0	0	0	0	0
YER119C	1	0	0	0	0	0	0	0	0	0	1	0	0	0	0	0	0	0	0	0	0	0	0	0	0	0	0	0	0	0	0	0	0	0	0	0	0	0	0	0	0	0	0	0	0	0	0	1	0
YER120W	0	0	0	0	0	0	0	0	0	0	1	0	0	0	1	0	0	0	0	0	1	0	0	1	1	1	0	0	0	0	0	0	0	0	0	0	0	0	0	0	0	0	0	0	0	0	0	1	0
YER121W	0	0	0	0	0	0	0	0	0	0	0	0	0	0	0	0	0	0	0	0	0	0	0	1	0	0	0	0	0	0	0	0	0	0	0	0	0	0	0	0	0	0	0	0	0	0	0	0	0
YER122C	1	0	0	0	0	0	0	0	0	0	0	0	0	0	1	0	0	0	0	0	0	0	0	0	0	0	0	0	0	1	0	1	0	0	0	1	0	0	0	0	0	0	0	0	0	0	0	0	0
YER123W	1	0	0	0	0	0	0	0	1	0	0	0	0	0	1	0	0	0	0	0	0	0	0	0	1	0	0	0	0	1	0	1	0	0	0	1	0	0	0	0	1	0	0	0	0	0	0	1	0
YER124C	1	0	0	0	0	0	0	0	1	0	0	0	0	0	1	0	0	0	0	0	0	0	0	0	0	0	0	0	0	1	0	1	0	0	0	1	0	0	0	0	0	0	0	0	1	0	0	0	0
YER125W	0	0	0	0	0	0	0	0	1	0	0	0	0	0	0	0	0	0	0	0	0	0	0	1	0	0	0	0	0	1	0	1	0	0	0	0	0	0	0	0	1	0	0	0	0	0	0	1	0
YER126C	0	0	0	0	0	0	0	0	0	1	1	0	0	0	1	0	0	0	0	0	0	0	1	0	1	1	0	0	0	0	0	0	0	0	0	1	0	0	0	0	0	0	0	0	0	0	0	1	0
YER127W	1	0	0	0	0	0	0	0	0	1	0	0	0	0	1	0	0	0	0	0	0	0	0	1	1	0	0	0	0	0	0	1	0	0	0	1	0	0	0	0	0	0	0	0	0	0	0	0	0
YER128W	1	0	1	0	0	0	0	0	0	0	0	0	0	0	0	0	0	1	0	0	1	0	0	1	0	1	0	0	0	0	0	0	0	0	0	0	0	0	0	0	0	0	0	0	0	0	0	0	0
YER129W	0	0	0	0	0	0	0	0	1	0	0	0	0	0	0	0	0	0	0	0	0	0	0	1	0	0	0	0	0	1	0	0	0	0	0	0	0	0	0	0	0	0	0	0	0	0	0	0	0
YER130C	1	0	0	0	0	0	0	0	0	0	0	0	0	0	1	0	0	0	0	0	0	0	0	0	1	0	0	0	0	1	0	0	0	0	0	1	0	0	0	0	0	0	0	0	0	0	0	0	0
YER131W	1	0	0	0	0	0	0	0	0	0	1	1	0	0	1	0	0	1	0	1	1	0	1	1	1	1	0	0	0	1	0	0	1	0	0	1	0	0	0	0	0	0	0	0	0	0	0	1	0
YER132C	1	0	0	0	0	0	0	0	0	0	0	1	0	0	1	0	0	0	0	0	0	0	0	1	0	0	0	0	0	0	0	1	0	0	0	0	0	0	0	0	1	0	0	0	0	0	0	1	0
YER133W	0	0	0	0	0	0	0	0	0	0	0	0	0	0	1	0	0	0	0	0	0	0	0	1	0	0	0	0	0	0	0	0	0	0	0	0	0	0	0	0	0	0	0	0	0	0	0	1	0
YER134C	1	0	0	0	0	0	0	0	0	0	1	0	0	0	1	0	0	1	0	0	1	0	0	0	1	0	0	0	0	0	0	0	0	0	0	0	0	0	0	1	0	0	0	0	0	0	0	0	0
YER136W	0	0	0	0	0	0	0	0	1	0	0	0	0	0	0	0	0	0	0	0	0	0	0	1	0	0	0	0	0	1	0	1	0	0	0	1	0	0	0	0	0	0	0	0	0	0	0	0	0
YER137C	1	0	0	0	0	0	0	0	0	0	0	0	0	0	0	0	0	0	0	0	0	0	0	0	0	0	0	0	0	0	0	0	0	0	0	0	0	0	0	0	0	0	0	0	0	0	0	0	0
YER138C	0	0	1	0	0	0	0	0	0	0	0	0	0	0	0	0	0	0	0	0	0	0	0	0	0	0	0	0	0	0	0	0	0	0	0	0	0	0	0	0	0	0	0	0	0	0	0	0	0
YER138W-A	0	0	0	0	0	0	0	0	0	0	0	0	0	0	0	0	0	1	0	0	1	0	0	1	0	0	0	0	0	0	0	0	0	0	0	0	0	0	0	0	0	0	0	0	0	0	0	0	0
YER139C	1	0	0	0	0	0	0	0	0	0	0	0	0	0	1	0	0	0	0	0	0	0	0	1	1	0	0	0	0	0	0	0	0	0	0	0	0	0	0	0	0	0	0	0	1	0	0	1	0
YER140W	1	0	0	0	0	0	0	0	1	0	0	0	0	0	1	0	0	0	0	0	0	0	0	0	1	0	0	0	0	0	0	0	0	0	0	0	0	0	0	0	0	0	0	0	0	0	0	0	0
YER141W	1	0	0	0	0	0	0	0	0	0	1	0	0	0	0	0	0	1	0	1	1	0	0	1	1	1	0	0	0	0	0	0	0	0	0	1	0	0	0	0	0	0	0	0	0	0	0	1	0
YER142C	0	0	0	0	0	0	0	0	0	0	0	0	0	0	1	0	0	0	0	0	0	0	0	0	0	0	0	0	0	0	0	0	0	0	0	0	0	0	0	0	0	0	0	0	0	0	0	0	0
YER143W	1	0	0	0	0	0	0	0	0	0	0	0	0	0	1	0	0	0	0	0	0	0	0	0	1	0	0	0	0	0	0	0	0	0	0	0	0	0	0	0	0	0	0	0	0	0	0	0	0
YER144C	1	0	1	0	0	0	0	0	1	0	0	0	0	0	0	0	0	0	0	0	0	0	0	1	0	0	1	0	0	0	0	0	0	0	0	0	0	0	0	1	1	0	0	0	1	0	0	0	0
YER145C	1	0	0	0	0	0	0	0	0	0	0	0	0	0	1	0	0	0	0	0	1	0	0	0	0	0	0	0	0	0	0	1	0	0	0	0	0	0	0	0	1	0	0	0	0	0	0	1	0
YER146W	1	0	0	0	0	0	0	0	0	0	1	0	0	0	1	0	0	1	0	1	1	0	0	1	1	1	0	0	0	0	0	0	0	0	0	0	0	0	0	0	0	0	0	0	0	0	0	0	0
YER147C	1	0	0	0	0	0	0	0	0	0	0	0	0	0	0	0	0	0	0	0	0	0	0	0	0	0	0	0	0	0	0	0	0	0	0	0	0	0	0	0	0	0	0	0	0	0	0	0	0
YER148W	0	0	0	0	0	0	0	0	0	0	0	0	0	0	1	0	0	0	0	0	1	0	0	1	1	1	0	0	0	0	0	0	0	0	0	0	0	0	0	1	0	0	0	0	0	0	0	0	0
YER149C	1	0	0	0	0	0	0	0	0	0	0	0	0	0	1	0	0	0	0	0	0	0	0	1	0	0	0	0	0	0	0	0	0	0	0	0	0	0	0	0	0	0	0	0	0	0	0	0	0
YER150W	1	0	0	0	0	0	0	0	0	0	0	0	0	0	1	0	0	0	0	0	1	0	0	1	1	0	0	0	0	0	0	0	0	0	0	0	0	0	0	0	0	0	0	0	0	0	0	1	0
YER151C	0	0	1	0	0	0	0	0	1	0	0	0	0	0	1	0	0	0	0	0	0	0	0	0	0	0	0	0	0	1	0	0	0	0	0	1	1	0	0	0	1	0	0	0	0	0	0	0	0
YER152C	1	0	0	0	0	0	0	0	1	0	0	0	0	0	0	0	0	0	0	0	1	0	0	1	0	0	0	0	0	0	0	0	0	0	0	0	0	0	0	0	0	1	0	0	0	0	0	0	0
YER153C	0	0	0	0	0	0	0	0	1	0	0	0	0	0	1	0	0	0	0	0	0	0	0	0	0	0	0	0	0	0	0	0	0	0	0	0	0	0	0	0	0	0	0	0	0	0	0	0	0
YER154W	1	0	1	0	0	0	0	0	0	0	0	0	0	0	1	0	0	0	0	0	1	0	0	1	1	0	0	0	0	1	0	1	0	0	0	1	0	0	0	0	1	0	0	0	0	0	0	1	0
YER155C	1	0	0	0	0	0	0	0	1	0	0	0	0	0	1	0	0	0	0	0	1	0	0	1	0	0	0	0	0	1	0	0	0	0	0	1	0	0	0	0	0	0	0	0	0	0	0	0	0
YER156C	0	0	0	0	0	0	0	0	0	0	0	0	0	0	0	0	0	0	0	0	1	0	1	0	0	0	0	0	0	0	0	0	0	0	0	0	0	0	0	0	0	0	0	0	0	0	0	0	0
YER157W	0	0	0	0	0	0	0	0	1	0	0	0	0	0	1	0	0	0	0	0	0	0	0	0	0	0	0	0	0	0	0	1	0	0	0	0	0	0	0	0	0	0	0	0	0	0	0	0	0
YER158C	1	0	1	0	0	0	0	0	1	0	0	0	0	0	0	0	0	0	0	0	0	0	0	0	0	0	0	0	0	0	0	1	0	0	0	0	0	0	0	0	1	0	0	0	1	0	0	1	0
YER159C	1	0	1	0	0	0	0	0	0	0	0	0	0	0	1	0	0	1	0	0	1	0	0	1	1	0	0	0	0	0	0	0	0	0	0	1	0	0	1	0	0	0	0	0	0	0	0	0	0
YER160C	0	0	1	0	0	0	0	0	0	0	0	0	0	0	0	0	0	0	0	0	0	0	0	0	0	0	0	0	0	0	0	0	0	0	0	0	0	0	0	0	0	0	0	0	0	0	0	0	0
YER161C	1	0	0	0	0	0	0	0	0	0	0	0	0	0	1	1	0	0	0	0	0	0	0	1	1	0	0	0	0	0	0	0	0	0	0	0	0	0	0	0	0	0	0	0	0	0	0	0	0
YER162C	1	0	1	0	0	0	0	0	1	0	0	0	0	0	1	0	0	0	0	0	0	0	0	0	0	0	0	0	0	0	0	0	0	0	0	1	0	0	0	0	0	0	0	0	0	0	0	0	0
YER163C	1	0	1	0	0	0	0	0	0	0	1	0	0	0	0	0	0	1	0	0	1	0	0	1	0	1	0	0	0	0	0	0	0	0	0	1	0	0	0	0	0	0	0	0	0	0	0	0	0
YER164W	1	0	0	0	0	0	0	0	1	0	0	0	0	0	1	0	0	0	0	0	0	0	0	1	0	0	0	0	0	1	0	1	0	0	0	1	0	0	0	0	1	0	0	0	0	0	0	0	0
YER165W	0	0	0	0	0	0	0	0	0	0	0	1	0	0	1	0	0	0	0	0	0	0	1	1	1	0	0	0	0	1	0	1	1	0	0	0	0	0	0	0	0	0	0	0	0	0	0	1	0
YER166W	1	0	0	0	0	0	0	0	1	0	0	0	0	0	0	0	0	1	0	0	1	0	0	0	0	0	0	0	0	1	0	1	0	0	0	1	0	0	0	0	0	0	0	0	0	0	0	0	0
YER167W	1	0	1	0	0	0	0	0	1	0	0	0	0	0	1	0	0	0	0	0	0	0	0	1	0	0	0	0	0	0	0	1	0	0	0	0	0	0	0	0	0	0	0	0	0	0	0	0	0
YER168C	0	0	0	0	0	0	0	0	0	0	0	0	0	0	1	0	0	0	0	0	0	0	0	0	0	0	0	0	0	0	0	1	0	0	0	0	0	0	0	0	0	0	0	0	0	0	0	0	0
YER169W	1	0	1	0	0	0	0	0	1	0	0	0	0	0	0	0	0	0	0	0	0	0	0	0	1	0	0	0	0	0	0	1	0	0	0	0	0	0	0	0	1	0	0	0	0	0	0	0	0
YER170W	0	0	0	0	0	0	0	0	0	0	0	0	0	0	0	0	0	1	0	0	0	0	0	1	0	0	0	0	0	0	0	0	0	0	0	1	0	0	0	0	0	0	0	0	1	0	0	0	0
YER171W	0	0	0	0	0	0	0	0	1	0	0	0	0	0	0	0	0	0	0	0	0	0	0	1	1	0	0	0	0	0	0	0	0	0	0	0	0	0	0	0	1	0	0	0	0	0	0	0	0
YER172C	1	0	1	0	1	0	0	0	1	0	0	0	0	0	1	0	0	0	0	0	0	0	0	0	0	0	0	0	0	0	0	0	0	0	0	0	0	0	0	0	0	0	0	0	0	0	0	0	0
YER173W	1	0	0	0	0	0	0	0	1	0	0	0	0	0	0	0	0	0	0	0	0	0	0	1	0	0	0	0	0	0	0	0	0	0	0	0	0	0	0	0	0	0	0	0	0	0	0	0	0
YER174C	0	0	0	0	0	0	0	0	0	0	0	0	0	0	1	0	0	0	0	0	1	0	0	0	1	0	0	0	0	0	0	0	0	0	0	0	0	0	0	0	0	0	0	0	0	0	0	1	0
YER175C	0	0	0	0	0	0	0	0	0	0	0	0	0	0	0	0	0	0	0	0	0	0	0	1	0	0	0	0	0	0	0	0	0	0	0	0	0	0	0	0	0	0	0	0	0	0	0	0	0
YER176W	1	0	0	0	0	0	0	0	1	0	0	0	0	0	1	0	0	0	0	0	1	0	0	0	0	0	0	0	0	0	0	0	0	0	0	0	0	0	0	0	0	0	0	0	0	0	0	0	0
YER177W	0	0	0	0	0	0	0	0	0	0	0	0	0	0	1	0	0	0	0	0	1	0	0	1	0	0	0	0	0	0	0	0	0	0	0	1	0	0	0	0	0	0	0	0	0	0	0	0	0
YER178W	0	0	0	0	0	0	0	0	0	0	1	0	0	0	1	0	0	0	0	0	0	0	0	1	0	0	0	0	0	1	0	0	0	0	0	0	0	0	0	0	0	0	0	0	0	0	0	0	0
YER179W	0	0	1	0	0	0	0	0	0	0	0	0	0	0	0	0	0	0	0	0	0	0	0	1	0	0	0	0	0	0	0	0	0	0	0	0	0	0	0	0	0	0	0	0	0	0	0	0	0
YER180C	0	0	0	0	0	0	0	0	1	0	0	0	0	0	0	0	0	0	0	0	0	0	0	0	0	0	0	0	0	0	0	0	0	0	0	0	0	0	0	0	0	0	0	0	1	0	0	1	0
YER180C-A	0	0	0	0	0	0	0	0	0	0	0	0	0	0	0	0	0	0	0	0	0	0	0	1	0	0	0	0	0	0	0	0	0	0	0	0	0	0	0	0	0	0	0	0	0	0	0	1	0
YER182W	1	0	0	0	0	0	0	0	0	0	0	0	0	0	0	0	0	1	0	0	0	0	0	1	0	0	0	0	0	0	0	0	0	0	0	1	0	0	0	0	0	0	0	0	0	0	0	0	0
YER183C	0	0	0	0	0	0	0	0	0	0	0	0	0	0	1	0	0	0	0	1	1	0	0	1	1	0	0	0	0	0	0	0	0	0	0	0	0	0	0	0	0	0	0	0	0	0	0	0	0
YER184C	1	0	0	0	0	0	0	0	1	0	0	0	0	0	0	0	0	0	0	0	0	0	0	1	0	0	0	0	0	0	0	0	0	0	0	0	0	0	0	0	0	0	0	0	0	0	0	0	0
YER185W	0	0	0	0	0	0	0	0	1	0	0	0	0	0	0	0	0	0	0	0	0	0	0	0	0	0	0	0	0	0	0	0	0	0	0	0	0	0	0	0	0	0	0	0	0	0	0	0	0
YER186C	0	0	0	0	0	0	0	0	0	0	0	0	0	0	0	0	0	0	0	0	1	0	0	1	0	0	1	0	0	0	0	0	0	0	0	0	0	0	0	0	0	1	0	0	0	0	0	0	0
YER187W	0	0	0	0	0	0	0	0	0	0	0	0	0	0	0	0	0	0	0	0	0	0	0	0	0	0	0	0	0	0	0	0	0	0	0	0	0	0	0	0	0	0	0	0	1	0	0	0	0
YER189W	0	0	1	0	0	0	0	0	1	0	0	0	0	0	0	0	0	1	0	0	0	0	0	0	0	0	1	0	0	0	0	0	0	0	0	0	0	1	0	1	1	0	0	0	0	0	0	1	0
YER190W	0	0	1	0	0	0	0	0	1	0	0	0	0	0	0	0	0	0	0	0	0	0	0	0	0	0	0	0	0	0	0	0	0	0	0	0	0	0	0	0	1	0	0	0	0	0	0	0	0
YFL001W	1	0	0	0	0	0	0	0	0	0	0	0	0	0	1	0	0	0	0	0	0	0	1	0	1	0	0	0	0	1	0	1	0	0	0	0	0	0	0	0	0	0	0	0	0	0	0	0	0
YFL002C	1	0	0	0	0	0	0	0	0	0	0	0	0	0	1	1	0	0	0	0	0	0	0	1	1	0	0	0	0	1	0	1	0	0	0	0	0	0	0	0	0	0	0	0	0	0	0	0	0
YFL003C	0	0	0	0	0	0	0	0	1	0	0	1	0	0	1	0	0	0	0	0	0	0	0	1	0	0	0	0	0	0	0	0	0	0	0	0	0	0	0	0	0	0	0	0	1	0	0	0	0
YFL004W	0	0	0	0	0	0	0	0	0	0	0	0	0	0	1	0	0	0	0	0	0	0	0	1	0	0	0	0	0	1	0	1	0	0	0	0	0	0	0	0	0	0	0	0	0	0	0	0	0
YFL005W	0	0	0	0	0	0	0	0	0	0	0	0	0	0	0	0	0	0	0	0	1	0	0	1	0	1	0	0	0	0	0	0	0	0	1	0	0	0	0	0	0	0	0	0	0	0	0	1	0
YFL007W	0	0	0	0	0	0	0	0	1	0	0	0	0	0	1	0	0	0	0	0	0	0	0	0	0	0	0	0	0	1	0	1	0	0	0	1	0	0	0	0	0	0	0	0	0	0	0	0	0
YFL008W	1	0	0	0	0	0	0	0	1	0	0	0	0	0	1	0	0	0	0	0	0	0	0	1	0	0	0	0	0	1	0	1	0	0	0	1	0	0	0	0	0	0	0	0	0	0	0	0	0
YFL009W	0	0	0	0	0	0	0	0	1	0	0	0	0	0	1	0	0	0	0	0	0	0	0	0	0	0	0	0	0	0	0	1	0	0	0	0	0	0	0	0	0	0	0	0	0	0	0	0	0
YFL010C	0	0	0	0	0	0	0	0	0	0	1	0	0	0	0	0	0	0	0	0	0	0	0	0	0	0	0	0	0	1	0	0	0	0	0	0	0	0	0	0	0	0	0	0	0	0	0	0	0
YFL013C	1	0	0	0	0	0	0	0	1	0	0	0	0	0	1	0	0	0	0	0	0	0	0	1	1	0	0	0	0	0	0	0	0	0	0	1	0	0	0	0	0	0	0	0	0	0	0	0	0
YFL014W	1	0	0	0	0	0	0	0	0	0	0	1	0	0	1	0	0	0	0	1	1	0	0	1	0	0	0	0	0	0	1	0	0	0	0	1	0	0	0	0	0	0	0	0	0	0	0	0	0
YFL016C	1	0	0	0	0	0	0	0	0	0	0	0	0	0	1	0	0	0	0	0	0	0	0	0	1	0	0	0	0	0	0	0	0	0	0	0	0	0	0	0	0	0	0	0	0	0	0	0	0
YFL017C	1	0	0	0	0	0	0	0	0	1	1	1	0	0	1	0	0	1	0	1	1	0	0	0	0	1	0	0	0	0	0	0	0	0	0	0	0	0	0	0	0	0	0	0	0	0	0	0	0
YFL017W-A	0	0	0	0	0	0	0	0	0	0	0	0	0	0	0	0	0	1	0	0	1	0	1	0	1	1	0	0	0	0	0	0	0	0	0	0	0	0	0	0	0	0	0	0	0	0	0	0	0
YFL018C	0	0	0	0	0	0	0	0	0	0	0	0	0	0	1	0	0	0	0	0	0	0	0	1	0	0	0	0	0	1	0	1	0	0	0	0	0	0	0	0	1	0	0	0	0	0	0	0	0
YFL020C	0	0	0	0	0	0	0	0	0	0	0	0	0	0	0	0	0	0	0	0	0	0	0	0	0	0	0	0	0	0	0	0	0	0	0	0	0	0	0	0	0	0	0	0	1	0	0	0	0
YFL021W	1	0	1	0	0	0	0	0	0	0	0	0	0	0	1	0	0	1	0	0	0	0	0	0	0	0	0	0	0	0	0	1	0	0	0	1	0	0	0	0	0	0	0	0	0	0	0	0	0
YFL022C	0	0	0	0	0	0	0	0	0	0	0	0	0	0	0	0	0	0	0	0	0	0	0	0	0	0	0	0	0	1	0	0	1	0	1	0	0	0	0	0	0	0	0	0	0	0	0	0	0
YFL023W	1	0	0	0	0	0	0	0	0	0	0	0	0	0	1	1	0	0	0	0	0	0	1	0	1	0	0	0	0	0	0	0	0	0	0	0	0	0	0	0	0	0	0	0	0	0	0	0	0
YFL024C	1	0	1	0	0	0	0	0	1	0	0	0	0	0	1	0	0	0	0	0	0	0	0	1	1	0	0	0	0	1	0	0	0	0	0	0	0	0	0	0	0	0	0	0	0	0	0	0	0
YFL025C	1	0	1	0	0	0	0	0	1	0	0	0	0	0	1	0	0	0	0	0	0	0	0	0	0	0	0	0	0	0	0	1	0	0	0	0	0	0	0	0	0	0	0	0	0	0	0	0	0
YFL026W	0	0	1	0	0	0	0	0	1	0	0	0	0	0	1	0	0	1	0	0	1	0	0	0	0	0	0	0	0	1	0	1	0	0	0	1	0	0	0	0	0	0	0	0	0	0	0	0	0
YFL027C	1	0	0	0	0	0	0	0	0	0	0	0	0	0	1	0	0	0	0	0	0	0	0	0	1	0	0	0	0	0	0	0	0	0	0	1	0	0	0	0	0	0	0	0	0	0	0	0	0
YFL028C	1	0	0	0	0	0	0	0	0	0	0	0	0	0	1	0	0	0	0	0	1	0	0	0	0	0	0	0	0	0	0	0	0	0	0	0	0	0	0	0	0	0	0	0	0	0	0	0	0
YFL029C	1	0	0	0	0	0	0	0	0	0	0	0	0	0	0	0	0	1	0	0	0	0	0	0	0	0	0	0	0	0	0	0	0	0	0	0	0	0	0	0	0	0	0	0	0	0	0	0	0
YFL030W	0	0	0	0	0	0	0	0	0	0	0	0	0	0	0	0	0	0	0	0	0	0	0	1	0	0	0	0	0	0	0	0	0	0	0	0	0	0	0	0	0	0	0	0	0	0	0	0	0
YFL031W	1	0	0	0	0	0	0	0	0	0	0	0	0	0	1	0	0	1	0	0	0	0	0	1	1	0	1	0	0	1	0	0	0	0	0	0	0	0	0	0	0	0	0	0	0	0	0	1	0
YFL033C	1	0	0	0	0	0	0	0	1	0	0	1	0	0	0	0	0	0	0	0	0	0	0	1	0	0	0	0	0	0	0	0	0	0	0	0	0	0	0	0	0	0	0	0	0	0	0	0	0
YFL034C-A	1	0	1	0	0	0	0	0	0	0	1	0	0	0	1	0	0	1	0	1	1	0	1	0	1	0	0	0	0	0	0	0	0	0	0	1	0	0	0	0	0	0	0	0	1	0	0	0	0
YFL034C-B	0	0	1	0	0	0	0	0	0	0	0	0	0	0	1	0	0	1	0	0	0	0	0	0	0	0	0	0	0	0	0	0	0	0	0	0	0	0	0	0	0	0	0	0	0	0	0	0	0
YFL034W	1	0	0	0	0	0	0	0	1	0	0	0	0	0	1	0	0	0	0	0	0	0	0	0	1	0	0	0	0	1	0	0	1	0	0	1	0	0	0	0	0	0	0	0	0	0	0	0	0
YFL036W	1	0	0	0	0	0	0	0	1	0	0	0	0	0	0	0	0	0	0	0	0	0	0	0	0	0	0	0	0	1	0	1	0	0	0	1	0	0	0	0	0	0	0	0	0	0	0	0	0
YFL037W	0	0	0	0	0	0	0	0	0	0	0	0	0	0	1	0	0	0	0	0	0	0	0	1	0	0	0	0	0	1	0	1	1	0	0	1	0	0	0	0	0	0	0	0	0	0	0	1	0
YFL038C	0	0	0	0	0	0	0	0	0	0	1	0	0	0	0	0	0	0	0	1	1	0	0	1	1	0	0	0	0	0	0	0	0	0	0	1	0	0	0	0	0	0	0	0	0	0	0	0	0
YFL039C	0	0	0	0	0	0	0	0	0	1	0	0	0	0	1	0	0	0	0	0	0	0	0	1	0	0	0	0	0	1	0	1	0	0	0	0	0	0	0	0	0	0	0	0	0	0	1	0	0
YFL041W	1	0	0	0	0	0	0	0	0	0	0	0	0	0	0	0	0	0	0	0	0	0	0	0	0	0	0	0	0	0	0	1	0	0	0	0	0	0	0	0	0	0	0	0	0	0	0	0	0
YFL041W-A	0	0	0	0	0	0	0	0	0	0	0	0	0	0	0	0	0	0	0	0	0	0	0	1	0	0	0	0	0	0	0	0	0	0	0	0	0	0	0	0	0	0	0	0	1	0	0	0	0
YFL042C	1	0	0	0	0	0	0	0	1	0	0	0	0	0	1	1	0	0	0	0	0	0	0	0	0	0	0	0	0	0	0	0	0	0	0	0	0	0	0	0	0	0	0	0	0	0	0	0	0
YFL044C	0	0	0	0	0	0	0	0	0	0	0	0	0	0	0	0	0	0	0	0	0	0	0	1	0	0	0	0	0	0	0	0	0	0	0	1	0	0	0	0	0	0	0	0	0	0	0	0	0
YFL045C	0	0	0	0	0	0	0	0	0	0	0	1	0	0	1	0	0	0	0	0	1	0	1	0	1	0	0	0	0	0	0	0	1	0	0	1	0	0	0	0	0	0	0	0	0	0	0	1	0
YFL046W	1	0	0	0	0	0	0	0	0	0	0	0	0	0	1	1	0	0	0	1	1	0	0	1	0	1	0	0	0	0	0	0	0	0	0	0	0	0	0	0	0	0	0	0	0	0	0	0	0
YFL047W	1	0	0	0	0	0	0	0	1	0	0	0	0	0	1	0	0	0	0	0	0	0	0	1	0	0	0	0	0	0	0	1	0	0	0	1	0	0	0	0	0	0	0	0	0	0	0	0	0
YFL048C	0	0	0	0	0	0	0	0	0	0	0	0	0	0	1	0	0	0	0	0	0	0	0	1	0	0	0	0	0	0	0	1	0	0	0	0	0	0	0	0	0	0	0	0	0	0	0	0	0
YFL049W	1	0	0	0	0	0	0	0	0	0	0	0	0	0	1	0	0	0	0	0	0	0	0	1	1	0	0	0	0	0	0	0	0	0	0	1	0	0	0	0	0	0	0	0	0	0	0	0	0
YFL050C	0	0	0	0	0	0	0	0	0	0	0	0	0	0	0	1	0	0	0	0	0	0	0	0	0	0	0	0	0	0	0	0	0	0	0	0	0	0	0	0	0	0	0	0	0	0	0	0	0
YFL052W	0	0	0	0	0	0	0	0	1	0	0	0	0	0	0	0	0	0	0	0	0	0	0	0	0	0	0	0	0	0	0	0	0	0	0	0	0	0	0	0	0	0	0	0	0	0	0	0	0
YFL054C	1	0	0	0	0	0	0	0	1	0	0	0	0	0	0	0	0	0	0	0	0	0	0	1	0	0	0	0	0	0	0	0	0	0	0	0	0	0	0	0	0	0	0	0	0	0	0	0	0
YFL055W	0	0	0	0	0	0	0	0	1	0	0	0	0	0	0	0	0	0	0	0	0	0	0	0	0	0	0	0	0	0	0	0	0	0	0	0	0	0	0	0	0	0	0	0	0	0	0	0	0
YFL056C	0	0	0	0	0	0	0	0	1	0	0	0	0	0	0	0	0	0	0	0	0	0	0	0	0	0	0	0	0	0	0	0	0	0	0	0	0	0	0	0	0	0	0	0	0	0	0	1	0
YFL057C	0	0	0	0	0	0	0	0	0	0	0	0	0	0	0	0	0	0	0	0	0	0	0	1	0	0	0	0	0	0	0	0	0	0	0	0	0	0	0	0	0	0	0	0	1	0	0	1	0
YFL062W	0	0	0	0	0	0	0	0	0	0	0	0	0	0	0	0	0	0	0	0	1	0	0	0	0	0	0	0	0	0	0	1	0	0	0	0	0	0	0	0	0	0	0	0	0	0	0	1	0
YFL064C	0	0	1	0	0	0	0	0	1	0	0	0	0	0	0	0	0	0	0	0	0	0	0	0	0	0	1	0	0	0	0	0	0	0	0	0	0	1	0	1	1	0	0	0	0	0	0	0	0
YFL065C	0	0	1	0	0	0	0	0	1	1	0	0	0	0	0	0	0	0	0	0	0	0	0	0	0	0	1	0	0	0	0	0	0	0	0	0	0	1	0	1	1	0	0	0	0	0	0	0	0
YFL066C	0	0	0	0	0	0	0	0	1	0	0	0	0	0	0	0	0	0	0	0	0	0	0	0	1	0	0	0	0	0	0	0	0	0	0	0	0	0	0	0	1	0	0	0	0	0	0	0	0
YFL067W	0	0	1	0	0	0	0	0	0	0	0	0	0	0	0	0	0	0	0	0	0	0	0	0	0	0	0	0	0	0	0	0	0	0	0	0	0	0	0	0	0	0	0	0	0	0	0	0	0
YFL068W	0	0	1	0	0	0	0	0	0	0	0	0	0	0	0	0	0	0	0	0	0	0	0	0	0	0	0	0	0	0	0	0	0	0	0	0	0	0	0	0	0	0	0	0	0	0	0	0	0
YFR001W	1	0	0	0	0	0	0	0	0	1	1	0	0	0	1	0	0	0	0	0	0	0	1	1	1	0	0	0	0	0	0	0	0	0	0	1	0	0	0	0	0	0	0	0	0	0	0	0	0
YFR002W	0	0	0	0	0	0	0	0	0	0	0	0	0	0	0	0	0	0	0	0	1	0	0	0	0	0	0	0	0	1	0	0	0	0	0	1	0	0	0	0	0	0	0	0	0	0	0	0	0
YFR003C	0	0	0	0	0	0	0	0	0	0	1	0	0	0	1	0	0	1	0	0	1	0	0	1	0	1	0	0	0	0	0	0	0	0	0	0	0	0	0	0	0	0	0	0	0	0	0	0	0
YFR004W	1	0	0	0	0	0	0	0	0	1	0	0	0	0	1	0	0	0	0	0	0	0	0	1	0	1	0	0	0	1	0	0	0	0	0	0	0	0	0	0	0	0	0	0	0	0	0	0	0
YFR005C	1	0	0	0	0	0	0	0	1	0	0	0	0	0	1	0	0	0	0	0	0	0	0	1	0	0	1	0	0	0	0	0	0	0	0	0	0	0	0	0	0	0	0	0	1	0	0	0	0
YFR006W	0	0	0	0	0	0	0	0	0	0	0	0	0	0	0	0	0	0	0	0	0	0	0	1	0	0	0	0	0	0	0	1	0	0	0	0	0	0	0	0	0	0	0	0	0	0	0	0	0
YFR007W	1	0	0	0	0	0	0	0	0	0	0	0	0	0	1	0	0	1	0	0	0	0	0	1	1	1	0	0	0	0	0	0	0	0	0	1	0	0	0	0	0	0	0	0	0	0	0	0	0
YFR008W	0	0	1	0	0	0	0	0	0	0	0	0	0	0	1	0	0	0	0	0	0	0	0	0	0	0	0	0	0	0	0	0	0	0	0	0	0	0	0	0	0	0	0	0	1	0	0	0	0
YFR009W	0	0	0	0	0	0	0	0	0	0	0	0	0	0	1	0	0	0	0	0	0	0	0	0	0	0	0	0	0	1	0	1	0	0	0	0	0	0	0	0	0	0	0	0	0	0	0	0	0
YFR010W	0	0	0	0	0	0	0	0	0	0	0	0	0	0	0	0	0	0	0	0	0	0	0	1	0	0	0	0	0	1	0	1	0	0	0	0	0	0	0	0	0	0	0	0	0	0	0	0	0
YFR011C	1	0	0	0	0	0	0	0	0	0	0	0	0	0	1	0	0	1	0	0	1	0	0	0	0	1	0	0	0	0	0	0	0	0	0	1	0	0	0	0	0	0	0	0	0	0	0	0	0
YFR012W	0	0	0	0	0	0	0	0	0	0	0	0	0	0	0	0	0	0	0	0	0	0	0	1	0	0	0	0	0	0	0	0	0	0	0	0	0	0	0	0	0	0	0	0	0	0	0	0	0
YFR013W	1	0	0	0	0	0	0	0	1	0	0	0	0	0	1	0	0	0	0	0	0	0	1	0	1	0	0	0	0	0	0	0	0	0	0	0	0	0	0	0	0	0	0	0	0	0	0	0	0
YFR014C	1	0	0	0	0	0	0	0	0	0	0	0	0	0	1	0	0	0	0	0	0	0	0	1	1	0	0	0	0	0	0	0	0	0	0	1	0	0	0	0	0	0	0	0	0	0	0	1	0
YFR015C	1	0	0	0	0	0	0	0	1	0	0	0	0	0	1	0	0	0	0	0	0	0	0	1	0	0	0	0	0	0	0	0	0	0	0	0	0	0	0	0	0	0	0	0	0	0	0	0	0
YFR016C	1	0	0	0	0	0	0	0	1	0	0	0	0	0	1	0	0	0	0	0	0	0	0	0	0	0	0	0	0	0	0	0	0	0	0	1	0	0	0	0	0	0	0	0	0	0	0	0	0
YFR017C	1	0	1	0	0	0	0	0	0	0	1	0	0	0	0	0	0	1	0	0	1	0	0	1	0	0	0	0	0	0	0	0	0	0	0	0	0	0	0	0	0	0	0	0	0	0	0	1	0
YFR018C	0	0	0	0	0	0	0	0	0	0	0	0	0	0	0	1	0	0	0	0	0	0	0	0	0	0	0	0	0	0	0	0	0	0	0	0	0	0	0	0	1	0	0	0	0	0	0	0	0
YFR019W	1	0	0	0	0	0	0	0	1	0	0	0	0	0	1	0	0	0	0	0	0	0	0	0	0	0	0	0	0	0	0	0	0	0	0	0	0	0	0	0	0	0	0	0	0	0	0	0	0
YFR020W	0	0	0	0	0	0	0	0	0	0	0	0	0	0	0	0	0	0	0	0	0	0	0	0	0	1	0	0	0	0	0	0	0	0	0	0	0	0	0	0	0	0	0	0	0	0	0	1	0
YFR021W	0	0	0	0	0	0	0	0	1	0	0	0	0	0	0	0	0	0	0	0	0	0	0	0	0	0	0	0	0	0	0	0	0	0	0	0	0	0	0	0	0	0	0	0	0	0	0	0	0
YFR022W	1	0	0	0	0	0	0	0	1	0	0	0	0	0	0	0	0	0	0	0	0	0	0	1	0	0	0	0	0	0	0	0	0	0	0	1	0	0	0	0	0	0	0	0	0	0	0	0	0
YFR023W	0	0	0	0	0	0	0	0	0	0	0	0	0	0	0	0	0	0	0	0	0	0	0	1	0	0	0	0	0	0	0	0	0	0	0	0	0	0	0	0	0	0	0	0	0	0	0	0	0
YFR024C	0	0	0	0	0	0	0	0	0	0	0	0	0	0	0	0	0	0	0	0	0	0	0	0	0	0	0	0	0	0	0	0	0	0	0	0	0	0	0	0	0	0	0	0	0	0	0	0	0
YFR024C-A	0	0	0	0	0	0	0	0	0	1	0	0	0	0	1	0	0	0	0	0	0	0	0	0	0	1	0	0	0	0	0	1	0	0	0	0	0	0	0	0	0	0	0	0	0	0	0	0	0
YFR025C	0	0	0	0	0	0	0	0	0	0	1	0	0	0	0	0	0	1	0	0	1	0	0	0	0	0	0	0	0	0	0	0	0	0	0	0	0	0	0	0	0	0	0	0	0	0	0	0	0
YFR026C	0	0	0	0	0	0	0	0	0	0	0	0	0	0	0	0	0	0	0	0	0	0	0	0	0	0	0	0	0	0	0	0	0	0	0	0	0	0	0	0	0	0	0	0	1	0	0	0	0
YFR027W	1	0	0	0	0	0	0	0	0	0	0	0	0	0	1	0	0	0	0	0	0	0	0	1	0	0	0	0	0	0	0	0	0	0	0	0	0	0	0	0	0	0	0	0	0	0	0	0	0
YFR028C	1	0	0	0	0	0	0	0	0	0	0	0	0	0	1	0	0	0	0	0	0	0	0	1	0	0	0	0	0	0	0	1	0	0	0	1	0	0	0	0	1	0	0	0	0	0	0	0	0
YFR029W	1	0	1	0	0	0	0	0	1	0	0	0	0	0	0	0	0	0	0	0	0	0	0	0	0	0	0	0	0	0	0	0	0	0	0	0	0	0	0	0	0	0	0	0	0	0	0	0	0
YFR030W	0	0	0	0	0	0	0	0	1	0	0	0	0	0	0	0	0	0	0	0	0	0	0	1	0	0	0	0	0	0	0	0	0	0	0	0	0	0	0	0	0	0	0	0	0	0	0	0	0
YFR031C	1	0	0	0	0	0	0	0	1	0	0	0	0	0	0	0	0	0	0	0	0	0	0	1	0	0	0	0	0	0	0	0	0	0	0	1	0	0	0	0	0	0	0	0	0	0	0	0	0
YFR031C-A	0	0	0	0	0	0	0	0	0	0	1	0	0	0	0	0	0	0	0	1	1	0	0	1	0	0	0	0	0	1	0	0	0	0	0	0	0	0	0	0	0	0	0	0	0	0	0	0	0
YFR032C	0	0	0	0	0	0	0	0	0	0	0	0	0	0	0	0	0	0	0	0	0	0	0	0	0	0	0	0	0	0	0	0	0	0	0	0	0	0	0	0	0	0	0	0	0	0	0	0	0
YFR032C-A	0	0	0	0	0	0	0	0	0	0	1	0	0	0	1	0	0	1	0	1	1	0	0	1	0	1	0	0	0	0	0	0	0	0	0	0	0	0	0	0	0	0	0	0	0	0	0	0	0
YFR032C-B	0	0	0	0	0	0	0	0	0	0	0	0	0	0	1	0	0	1	0	0	1	0	0	0	0	0	0	0	0	0	0	0	0	0	0	0	0	1	0	0	0	0	0	0	0	0	0	1	0
YFR033C	1	0	0	0	0	0	0	0	0	1	0	0	0	0	1	1	0	0	0	0	1	0	0	1	1	0	0	0	0	0	0	1	0	0	0	1	0	0	0	0	0	0	0	0	0	0	0	0	0
YFR034C	1	0	1	0	0	0	0	0	1	1	0	0	0	0	1	1	1	1	0	0	0	0	0	0	1	1	0	0	0	0	0	0	0	0	0	0	0	0	0	0	1	0	0	0	1	0	0	0	0
YFR036W	1	0	0	0	0	0	0	0	0	0	0	0	0	0	1	0	0	1	0	0	0	0	0	0	1	1	0	0	0	0	0	0	0	0	0	0	0	0	0	0	0	0	0	0	0	0	0	0	0
YFR037C	0	0	0	0	0	0	0	0	0	1	1	1	0	0	0	1	0	0	0	0	0	0	0	1	1	0	0	0	0	1	0	1	0	0	0	0	0	0	0	0	1	0	0	0	0	0	0	0	0
YFR038W	0	0	0	0	0	0	0	0	1	0	0	0	0	0	0	1	0	0	0	0	0	0	0	1	0	0	0	0	0	0	0	0	0	0	0	0	0	0	0	0	0	0	0	0	0	0	0	0	0
YFR039C	1	0	0	0	0	0	0	0	1	0	0	0	0	0	1	0	0	0	0	0	0	0	0	0	1	0	0	0	0	0	0	1	0	0	0	0	0	0	0	0	0	0	0	0	0	0	0	0	0
YFR040W	1	0	0	1	0	0	0	0	1	0	0	0	0	0	1	0	0	0	0	0	0	0	0	1	0	0	0	0	0	1	0	1	0	0	0	1	0	0	0	0	0	0	0	0	0	0	0	0	0
YFR041C	0	0	0	0	0	0	0	0	0	0	0	0	0	0	0	0	0	0	0	1	1	0	0	1	0	0	0	0	0	0	0	1	0	0	0	0	0	0	0	0	0	0	0	0	0	0	0	0	0
YFR042W	1	0	0	0	0	0	0	0	0	0	1	0	0	0	1	0	0	1	0	1	1	0	0	0	0	1	0	0	0	0	0	0	0	0	0	1	0	1	0	0	0	0	0	0	0	0	0	1	0
YFR043C	1	0	0	0	0	0	0	0	0	0	0	0	0	0	1	0	0	0	0	0	0	0	0	1	1	0	0	0	0	0	0	0	0	0	0	0	1	0	0	0	0	0	0	0	0	0	0	0	0
YFR044C	0	0	0	0	0	0	0	0	0	0	1	0	0	0	1	0	0	0	0	0	0	0	0	0	0	0	0	0	0	0	0	1	0	0	0	0	0	0	0	0	0	0	0	0	0	0	0	0	0
YFR045W	1	0	0	0	0	0	0	0	1	0	0	0	0	0	1	0	0	0	0	0	0	0	0	0	0	0	0	0	0	0	0	0	0	0	0	1	0	0	0	0	0	0	0	0	0	0	0	0	0
YFR046C	1	0	0	0	0	0	0	0	0	0	0	0	0	0	1	0	0	0	0	0	1	0	0	1	0	0	0	0	0	0	0	0	0	0	0	0	0	0	0	0	0	0	0	0	0	0	0	0	0
YFR047C	0	0	0	0	0	0	0	0	0	0	0	0	0	0	1	0	0	0	0	0	1	0	0	1	0	1	0	0	0	0	0	0	0	0	0	0	0	0	0	0	0	0	0	0	0	0	0	0	0
YFR048W	1	0	0	0	0	0	0	0	1	0	0	1	0	0	1	0	0	0	0	0	0	0	0	0	1	0	0	0	0	0	0	0	0	0	0	1	0	0	0	0	0	0	0	0	0	0	0	0	0
YFR049W	0	0	0	0	0	0	0	0	0	0	1	0	0	0	0	0	0	1	0	1	1	0	0	1	0	0	0	0	0	0	0	0	0	0	0	0	0	0	0	0	0	0	0	0	0	0	0	1	0
YFR050C	0	0	0	0	0	0	0	0	0	0	0	0	0	0	1	0	0	0	0	0	1	0	0	0	0	0	0	0	0	0	0	0	0	0	0	0	0	0	0	0	0	0	0	0	0	0	0	1	0
YFR051C	0	0	1	0	0	0	0	0	0	0	0	0	0	0	1	0	0	0	0	0	0	0	0	1	0	0	0	0	0	0	0	1	0	0	0	0	0	0	0	0	0	0	0	0	0	0	0	0	0
YFR052W	0	0	0	0	0	0	0	0	0	0	0	0	0	0	1	0	0	0	0	0	1	0	0	0	0	0	0	0	0	1	0	0	0	0	0	0	0	0	0	0	0	0	0	0	0	0	0	0	0
YFR053C	1	0	0	0	0	0	0	0	0	0	0	1	0	0	1	0	0	0	0	0	0	0	0	1	1	0	0	0	0	1	0	0	0	1	0	1	0	0	0	0	0	0	0	0	0	0	0	0	0
YFR055W	0	0	0	0	0	0	0	0	0	0	0	0	0	0	1	0	0	1	0	0	0	0	0	0	1	1	0	0	0	0	0	0	0	0	0	0	0	0	0	0	0	0	0	0	1	0	0	0	0
YGL001C	1	0	0	0	0	0	0	0	0	0	0	0	0	0	0	0	0	0	0	0	1	0	0	1	0	0	0	0	0	0	0	0	0	0	0	1	0	0	0	0	0	0	0	0	0	0	0	0	0
YGL002W	1	0	0	0	0	0	0	0	0	0	1	0	0	0	1	0	0	0	0	0	1	0	0	1	1	1	0	0	0	0	0	0	0	0	0	0	0	0	0	0	0	0	0	0	0	0	0	1	0
YGL003C	1	0	0	0	0	0	0	0	1	0	0	0	0	0	1	0	0	0	0	0	0	0	0	1	1	0	0	0	0	0	0	0	0	0	0	1	0	0	0	0	0	0	0	0	0	0	0	0	0
YGL004C	1	0	0	0	0	0	0	0	0	0	0	0	0	0	0	0	0	0	0	0	0	0	0	0	0	0	0	0	0	0	0	0	0	0	0	0	0	0	0	0	0	0	0	0	0	0	0	0	0
YGL005C	1	0	0	0	0	0	0	0	1	0	0	0	0	0	1	0	0	0	0	0	0	0	0	1	0	0	0	0	0	0	0	0	0	0	0	0	0	0	0	0	0	0	0	0	0	0	0	0	0
YGL006W	1	0	0	0	0	0	0	0	1	0	0	0	0	0	0	0	0	0	0	0	0	0	0	1	0	0	0	0	0	1	0	0	0	0	0	0	0	0	0	0	0	0	0	0	0	0	0	0	0
YGL006W-A	0	0	0	0	0	0	0	0	0	0	0	0	0	0	0	0	0	1	0	0	0	0	0	1	0	0	0	0	0	0	0	0	0	0	0	0	0	0	0	0	0	0	0	0	0	0	0	0	0
YGL008C	0	0	1	0	0	0	0	0	0	1	0	1	0	0	1	0	0	0	0	0	0	0	0	0	0	0	0	0	0	1	0	1	1	0	0	1	0	0	0	0	1	0	1	0	0	0	1	1	0
YGL009C	0	0	0	0	0	0	0	0	0	0	0	1	0	0	1	0	0	0	0	0	0	0	1	0	0	0	0	0	0	1	0	1	0	0	0	0	0	0	0	0	0	0	0	0	0	0	0	0	0
YGL010W	1	0	0	0	0	0	0	0	0	0	0	0	0	0	1	0	0	0	0	0	0	0	0	0	1	0	0	0	0	0	0	0	0	0	0	0	0	0	0	0	0	0	0	0	0	0	0	0	0
YGL011C	0	0	0	0	0	0	0	0	0	0	0	1	0	0	1	0	0	0	0	0	1	0	0	1	0	0	0	0	0	1	0	0	0	0	0	0	0	0	0	0	0	0	0	0	0	0	0	0	0
YGL012W	0	0	0	0	0	0	0	0	0	0	0	1	0	0	1	0	0	0	0	0	0	0	0	0	1	0	0	0	0	1	0	1	1	0	0	0	0	0	0	0	0	0	0	0	0	0	0	1	0
YGL013C	1	0	1	0	0	0	0	0	1	0	0	0	0	0	1	0	0	0	0	0	0	0	0	0	0	0	0	0	0	0	0	1	0	0	0	1	0	0	0	0	0	0	0	0	0	0	0	0	0
YGL014W	1	0	1	0	0	0	0	0	1	0	0	0	0	0	1	0	0	0	0	0	0	0	1	1	1	0	0	0	0	0	0	1	0	0	0	1	0	0	0	0	0	0	0	0	0	0	0	1	0
YGL015C	0	0	0	0	0	0	0	0	0	0	0	0	0	0	0	0	0	0	0	0	0	0	0	0	0	0	0	0	0	0	0	0	0	0	0	0	0	0	0	0	0	0	0	0	1	0	0	0	0
YGL016W	0	0	0	0	0	0	0	0	1	0	0	0	0	0	1	0	0	0	0	0	0	0	0	0	0	0	0	0	0	0	0	1	0	0	0	0	0	0	0	0	0	0	0	0	0	0	0	1	0
YGL017W	1	0	0	0	0	0	0	0	0	0	0	0	0	0	0	0	0	0	0	0	0	0	0	0	0	0	0	0	0	1	0	0	0	0	0	0	0	0	0	0	0	0	0	0	0	0	0	0	0
YGL018C	1	0	0	0	0	0	0	0	0	0	0	0	0	0	0	0	0	1	0	0	0	0	0	1	1	0	0	0	0	0	0	0	0	0	0	1	0	0	0	0	0	0	0	0	0	0	0	0	0
YGL019W	0	0	0	0	0	0	0	0	0	0	0	0	0	0	0	0	0	0	0	0	0	0	0	0	1	1	0	0	0	0	0	0	0	0	0	0	0	0	0	0	0	0	0	0	0	0	0	1	0
YGL020C	0	0	0	0	0	0	0	0	0	0	0	0	0	0	0	0	0	0	0	0	1	0	0	1	0	0	0	0	0	0	0	1	0	0	0	0	0	0	0	0	0	0	0	0	0	0	0	0	0
YGL021W	0	0	1	0	0	0	0	0	1	0	0	0	0	0	0	1	0	0	0	0	0	0	0	0	0	0	0	0	0	0	0	0	0	0	0	0	0	0	0	0	0	0	0	0	0	0	0	0	0
YGL022W	0	0	0	0	0	0	0	0	0	0	0	0	0	0	0	0	0	0	0	0	0	0	0	1	0	0	0	0	0	1	0	1	0	0	0	0	1	0	0	0	1	0	0	0	0	0	0	0	0
YGL023C	1	0	0	0	0	0	0	0	0	1	0	0	0	0	1	0	0	0	0	0	0	0	0	0	1	0	0	0	0	0	0	1	0	0	0	0	0	0	0	0	1	0	0	0	0	0	0	0	0
YGL025C	1	0	1	0	0	0	0	0	0	0	0	0	0	0	1	0	0	1	0	0	0	0	0	0	1	0	0	0	0	0	0	0	0	0	0	0	0	0	0	0	0	0	0	0	0	0	0	0	0
YGL026C	0	0	0	0	0	0	0	0	0	0	0	0	0	0	1	0	0	0	0	0	0	0	0	0	0	0	0	0	0	0	0	1	0	0	0	0	0	0	0	0	0	0	0	0	0	0	0	0	0
YGL027C	0	0	0	0	0	0	0	0	0	0	0	0	0	0	0	0	0	0	0	0	0	0	0	0	1	0	0	0	0	0	0	1	0	0	0	0	0	0	0	0	0	0	0	0	0	0	0	0	0
YGL028C	1	0	1	0	0	0	0	0	1	0	0	1	0	0	1	1	0	0	1	0	0	0	1	0	1	0	0	0	0	1	0	1	0	0	0	0	0	0	0	0	1	0	0	0	0	0	0	1	0
YGL029W	1	0	0	0	0	0	0	0	0	1	0	0	0	0	1	0	0	0	0	0	0	0	0	1	1	0	0	0	0	0	0	0	0	0	0	1	0	0	0	0	0	0	0	0	0	0	0	0	0
YGL030W	0	0	0	0	0	0	0	0	0	0	1	0	0	0	1	0	0	1	0	1	1	0	0	1	1	1	0	0	0	1	0	0	0	0	0	1	0	0	0	0	0	0	1	0	0	0	0	0	0
YGL031C	0	0	0	0	0	0	0	0	0	0	1	1	0	0	1	0	0	1	0	0	1	0	1	1	0	1	0	0	0	1	0	0	0	0	0	1	0	1	0	0	0	0	0	0	0	0	0	1	0
YGL032C	0	0	1	0	0	0	0	0	0	0	0	0	0	0	1	0	0	1	0	0	1	0	0	0	1	0	0	0	0	0	0	0	0	0	0	0	0	0	0	0	0	0	0	1	0	0	0	1	0
YGL033W	0	0	0	0	0	0	0	0	0	0	0	0	0	0	0	0	0	0	0	0	0	0	0	0	0	0	0	0	0	0	0	0	0	0	0	0	0	0	0	0	0	0	0	0	0	0	0	0	0
YGL035C	1	0	1	0	0	0	0	0	1	0	0	0	0	0	1	0	0	0	0	0	0	0	0	1	0	0	0	0	0	0	0	0	0	1	0	0	0	0	0	0	0	0	0	0	0	0	0	0	0
YGL036W	1	0	1	0	0	0	0	0	1	0	0	0	0	0	1	0	0	0	0	0	0	0	0	0	0	0	0	0	0	0	0	1	0	0	0	0	0	0	0	0	0	0	0	0	0	0	0	1	0
YGL037C	0	0	0	0	0	0	0	0	0	0	0	0	0	0	1	0	0	1	0	0	1	0	0	1	0	0	0	0	0	1	0	0	0	0	0	1	0	0	0	0	0	0	0	0	0	0	0	0	0
YGL038C	1	0	0	0	0	0	0	0	0	0	0	0	0	0	0	0	0	0	0	0	0	0	0	0	0	0	0	0	0	0	0	0	0	0	0	0	0	0	0	0	1	0	0	0	0	0	0	0	0
YGL039W	0	0	0	0	0	0	0	0	0	0	0	0	0	0	0	0	0	0	0	0	0	0	0	1	0	0	0	0	0	0	0	0	0	0	0	0	0	0	0	0	0	0	0	0	0	0	0	0	0
YGL040C	1	0	0	0	0	0	0	0	0	0	0	0	0	0	1	0	0	0	0	0	0	0	0	0	1	0	0	0	0	0	0	1	0	0	0	1	0	0	0	0	0	0	0	0	0	0	0	0	0
YGL041W-A	0	0	0	0	0	0	0	0	0	0	0	0	0	0	0	0	0	0	0	0	0	0	0	1	1	0	0	0	0	0	0	0	0	0	0	1	0	0	0	0	0	0	0	0	0	0	0	0	0
YGL043W	1	0	0	0	0	0	0	0	0	0	0	0	0	0	1	0	0	0	0	0	0	0	0	1	0	0	0	0	0	0	0	0	0	0	0	1	0	0	0	0	0	0	0	0	0	0	0	0	0
YGL044C	0	0	0	0	0	0	0	0	0	0	0	0	0	0	1	0	0	0	0	0	0	0	0	0	1	0	0	0	0	0	0	0	0	0	0	1	0	0	0	0	0	0	0	0	0	0	0	0	0
YGL045W	0	0	0	0	0	0	0	0	1	0	0	0	0	0	1	0	0	1	0	0	0	0	0	1	0	0	0	0	0	0	0	0	0	0	0	0	0	0	0	0	0	0	0	0	0	0	0	0	0
YGL047W	0	0	0	0	0	0	0	0	0	0	0	0	0	0	0	0	0	1	0	0	1	0	0	1	0	0	0	0	0	0	0	0	0	0	0	0	0	0	0	0	0	0	0	0	0	0	0	0	0
YGL048C	0	0	0	0	0	0	0	0	0	0	0	0	0	0	1	0	0	0	0	0	0	0	1	1	1	0	0	0	0	1	0	0	0	0	0	0	0	0	0	0	0	0	0	0	0	0	0	0	0
YGL049C	1	0	1	0	0	0	0	0	0	0	0	0	0	0	1	0	0	0	0	0	1	0	1	1	0	0	0	0	0	1	0	1	0	0	0	1	0	0	0	0	0	0	0	0	0	0	0	0	0
YGL050W	0	0	0	0	0	0	0	0	0	0	0	0	0	0	1	0	0	0	0	0	1	0	0	1	1	1	0	0	0	0	0	0	0	0	0	1	0	0	0	0	0	0	0	0	0	0	0	1	0
YGL051W	0	0	0	0	0	0	0	0	0	0	0	0	0	0	0	0	0	0	0	0	1	0	0	1	0	0	0	0	0	0	0	0	0	0	0	0	0	0	0	0	0	0	0	0	0	0	0	1	0
YGL053W	0	0	0	0	0	0	0	0	0	0	0	0	0	0	0	0	0	1	0	0	1	0	0	1	0	0	0	0	0	0	0	0	0	0	0	0	0	0	0	1	0	0	0	0	0	0	0	0	0
YGL054C	1	0	0	0	0	0	0	0	0	0	1	0	0	0	1	0	0	0	0	1	1	0	0	0	1	0	0	0	0	0	0	0	0	0	0	1	0	0	0	0	0	0	0	0	1	0	0	1	0
YGL055W	0	0	0	0	0	0	0	0	0	0	0	1	0	0	1	0	0	0	0	0	0	0	0	1	0	0	0	0	0	1	0	1	0	0	0	0	0	0	0	0	0	0	0	0	0	0	0	1	0
YGL056C	1	0	1	0	0	0	0	0	0	0	0	0	0	0	1	0	0	1	0	0	0	0	0	0	0	0	0	0	0	0	0	1	0	0	0	1	0	0	0	0	1	0	0	0	0	0	0	1	0
YGL057C	1	0	0	0	0	0	0	0	0	0	0	0	0	0	1	0	0	0	0	0	1	0	0	1	1	0	0	0	0	0	0	0	0	0	0	1	0	0	0	0	0	0	0	0	0	0	0	1	0
YGL058W	1	0	0	0	0	0	0	0	0	0	0	0	0	0	1	0	0	1	0	0	1	0	0	1	1	1	0	0	0	0	0	0	0	0	0	1	0	0	0	0	0	0	0	0	0	0	0	0	0
YGL059W	1	0	0	0	0	0	0	0	1	0	0	0	0	0	1	0	0	0	0	0	0	0	0	1	0	0	1	0	0	0	0	0	0	0	0	1	0	0	0	1	0	0	0	0	0	0	0	0	0
YGL060W	0	0	0	0	0	0	0	0	1	0	0	0	0	0	1	0	0	0	0	0	0	0	0	1	0	0	0	0	0	0	0	0	0	0	0	0	0	0	0	0	0	0	0	0	0	0	0	0	0
YGL061C	1	0	0	0	0	0	0	0	0	0	0	0	0	0	1	0	0	0	0	0	0	0	0	0	1	0	0	0	0	0	0	0	0	0	0	0	0	0	0	0	0	0	0	0	0	0	0	0	0
YGL062W	1	0	0	0	0	0	0	0	1	1	0	0	0	0	1	0	0	0	0	0	0	0	1	0	0	0	0	0	0	0	0	1	0	0	0	0	0	0	0	0	0	0	0	0	0	0	0	0	0
YGL063W	0	0	0	0	0	0	0	0	1	0	0	0	0	0	0	0	0	0	0	0	0	0	1	0	0	0	0	0	0	0	0	0	0	0	0	1	0	0	0	0	0	0	0	0	1	0	0	0	0
YGL064C	1	0	0	0	0	0	0	0	0	0	0	0	0	0	1	0	0	1	0	0	0	0	0	1	0	0	0	0	0	0	0	0	0	0	0	1	0	0	0	0	0	0	0	0	0	0	0	0	0
YGL065C	1	0	0	0	0	0	0	0	0	0	0	0	0	0	1	0	0	0	0	0	1	0	0	0	1	0	0	0	0	0	0	1	0	0	0	0	0	0	0	0	0	0	0	0	0	0	0	1	0
YGL066W	1	0	1	0	0	0	0	0	0	0	0	0	0	0	1	0	0	0	0	0	0	0	0	1	0	0	0	0	0	1	0	0	0	0	0	1	0	0	0	0	0	0	0	0	0	0	0	0	0
YGL067W	0	0	0	0	0	0	0	0	0	0	0	0	0	0	0	0	0	0	0	0	0	0	0	0	0	0	1	0	0	0	0	0	0	0	0	0	0	0	0	0	0	0	0	0	0	0	0	1	0
YGL068W	1	0	1	0	0	0	0	0	0	0	0	0	0	0	1	0	0	1	0	0	1	0	0	1	1	0	0	0	0	0	0	0	0	0	0	1	0	0	0	0	0	0	0	0	0	0	0	0	0
YGL069C	0	0	0	0	0	0	0	0	0	0	0	0	0	0	0	0	0	0	0	0	0	0	0	0	0	0	0	0	0	0	0	0	0	0	0	1	0	0	0	0	0	0	0	0	0	0	0	0	0
YGL070C	1	0	0	0	0	0	0	0	0	0	0	0	0	0	1	0	0	1	0	0	1	0	1	0	1	0	0	0	0	0	0	0	0	0	0	1	0	0	0	0	0	0	0	0	0	0	0	0	0
YGL071W	1	0	1	0	0	0	0	0	0	0	0	0	0	0	1	0	0	0	0	0	0	0	0	0	0	0	0	0	0	0	0	0	0	0	0	1	0	0	0	0	1	0	0	0	1	0	0	0	0
YGL073W	1	0	0	0	0	0	0	0	0	0	1	0	0	0	1	0	0	0	0	0	0	0	0	0	0	0	0	0	0	0	0	1	0	0	0	0	0	0	0	0	0	0	0	0	0	0	0	0	0
YGL074C	0	0	1	0	0	0	0	0	0	0	0	0	0	0	0	0	0	0	0	0	0	0	0	0	0	0	0	0	0	0	0	0	0	0	0	0	0	0	0	0	0	0	0	0	0	0	0	0	0
YGL075C	1	0	0	0	0	0	0	0	0	0	0	0	0	0	1	0	0	0	0	0	0	0	0	0	0	0	0	0	0	0	0	0	0	0	0	0	0	0	0	0	0	0	0	0	0	0	0	0	0
YGL076C	1	0	0	0	0	0	0	0	0	0	1	0	0	0	1	0	0	0	0	1	1	0	1	1	1	0	0	0	0	0	0	0	0	0	0	1	0	0	1	0	0	0	0	0	0	0	0	0	0
YGL077C	0	0	0	0	0	0	0	0	0	0	0	0	0	0	0	0	0	0	0	0	0	0	0	0	0	0	0	0	0	0	0	1	0	0	0	0	0	0	0	0	0	0	0	0	0	0	0	1	0
YGL078C	0	0	0	0	0	0	0	0	0	0	0	0	0	0	1	0	0	0	0	0	0	0	1	0	0	0	0	0	0	1	0	0	0	0	0	0	0	0	0	0	0	0	0	0	0	0	0	0	0
YGL079W	1	0	0	0	0	0	0	0	0	0	1	0	0	0	1	0	0	0	0	1	1	0	0	1	0	0	0	0	0	0	0	0	0	0	0	1	0	0	0	0	0	0	0	0	0	0	0	1	0
YGL080W	1	0	1	0	0	0	0	0	0	0	0	0	0	0	1	0	0	1	0	1	1	0	0	1	1	0	0	0	0	0	0	0	0	0	0	0	0	0	0	0	0	0	0	0	0	0	0	1	0
YGL082W	1	0	0	0	0	0	0	0	0	0	0	1	0	0	1	0	0	1	0	0	0	0	0	1	0	0	1	0	0	0	0	1	0	0	0	0	0	0	0	0	0	0	0	0	0	0	0	1	0
YGL083W	0	0	1	0	0	0	0	0	1	0	0	0	0	0	0	0	0	0	0	0	0	0	1	0	1	0	0	0	0	0	0	1	0	0	1	0	0	0	0	0	0	0	0	0	0	0	0	1	0
YGL084C	0	0	1	0	0	0	0	0	0	0	0	0	0	0	1	0	0	0	0	0	0	0	0	1	0	0	0	0	0	0	0	1	0	0	0	0	0	0	0	0	0	0	0	0	0	0	0	1	0
YGL085W	1	0	0	0	0	0	0	0	0	0	0	0	0	0	1	0	0	0	0	0	1	0	0	0	1	1	0	0	0	0	0	0	0	0	0	0	0	0	0	0	0	0	0	0	1	0	0	1	0
YGL086W	1	0	0	0	0	0	0	0	0	0	0	0	0	0	1	0	0	0	0	0	0	0	0	1	1	0	0	0	0	1	0	1	0	0	0	1	0	0	0	0	0	0	0	0	0	0	0	0	0
YGL087C	0	0	0	0	0	0	0	0	0	0	1	0	0	0	0	0	0	1	0	1	1	0	0	1	0	0	0	0	0	0	0	0	0	0	0	0	0	0	0	1	0	0	0	0	0	0	0	0	0
YGL088W	0	0	0	0	0	0	0	0	0	0	0	0	0	0	0	0	0	1	0	0	0	0	0	0	0	1	1	0	0	0	0	0	0	0	0	0	0	0	0	1	0	0	0	0	0	0	0	1	0
YGL089C	0	0	0	0	0	0	0	0	0	0	0	0	0	0	0	0	0	0	0	0	0	0	0	1	0	0	0	0	0	0	0	0	0	0	0	1	0	0	0	0	0	0	0	0	0	0	0	0	0
YGL090W	1	0	1	0	0	0	0	0	1	0	0	0	0	0	1	1	0	0	0	0	0	0	0	0	1	0	0	0	0	0	0	0	0	0	0	0	0	0	0	0	0	0	0	0	0	0	0	0	0
YGL091C	1	0	0	0	0	0	0	0	0	0	0	0	0	0	1	0	0	0	0	0	0	0	0	1	0	0	0	0	0	0	0	0	0	0	0	0	0	0	0	0	0	0	0	0	0	0	0	0	0
YGL092W	1	0	0	0	0	0	0	0	1	0	0	0	0	0	1	0	0	0	0	0	0	0	0	0	0	0	0	0	0	1	0	1	0	0	0	1	0	0	0	0	0	0	0	0	0	0	0	0	0
YGL093W	1	0	0	0	0	0	0	0	1	0	0	0	0	0	0	0	0	0	0	0	0	0	0	0	0	0	0	0	0	0	0	0	0	0	0	1	0	0	0	0	0	0	0	0	0	0	0	0	0
YGL094C	1	0	0	0	0	0	0	0	1	0	0	0	0	0	0	1	0	0	0	0	0	0	0	1	0	0	0	0	0	1	0	1	0	0	0	1	0	0	0	0	0	0	0	0	0	0	0	0	0
YGL095C	1	0	0	0	0	0	0	0	0	0	1	0	0	0	0	1	0	0	0	0	0	0	0	1	0	0	0	0	0	0	0	1	0	0	0	0	0	0	0	0	0	0	0	0	0	0	0	0	0
YGL096W	0	0	0	0	0	0	0	0	1	0	0	0	0	0	0	0	0	0	0	0	0	0	0	1	1	0	1	0	0	0	0	0	0	0	0	0	0	0	0	0	0	0	0	0	1	0	0	1	0
YGL097W	0	0	0	0	0	0	0	0	0	0	0	0	0	0	0	0	0	0	0	0	0	0	1	0	1	0	0	0	0	0	0	0	0	0	0	0	0	0	0	0	0	0	0	0	0	0	0	0	0
YGL098W	1	0	0	0	0	0	0	0	0	0	0	0	0	0	1	0	0	0	0	0	0	0	0	1	1	0	0	0	0	0	0	0	0	0	0	0	0	0	0	1	0	0	0	0	0	0	0	0	0
YGL099W	0	0	0	0	0	0	0	0	0	0	1	0	0	0	1	0	0	0	0	0	0	0	1	1	1	0	0	0	0	0	0	1	0	0	0	0	0	0	0	0	0	0	0	0	0	0	0	0	0
YGL100W	0	0	0	0	0	0	0	0	0	0	0	0	0	0	1	0	0	0	0	0	0	0	0	1	0	0	0	0	0	0	0	1	0	0	0	1	0	0	0	0	0	0	0	0	0	0	0	0	0
YGL101W	1	0	0	0	0	0	0	0	0	0	0	0	0	0	1	0	0	1	0	0	1	0	1	0	1	1	0	0	0	0	0	1	0	0	0	1	0	0	0	0	0	0	0	0	0	0	0	1	0
YGL102C	0	0	0	0	0	0	0	0	0	0	0	0	0	0	0	0	0	0	0	0	0	0	0	0	1	0	0	0	0	0	0	0	0	0	0	0	0	0	0	0	0	0	0	0	0	0	0	0	0
YGL103W	0	0	0	0	0	0	0	0	0	0	1	1	0	0	1	0	0	0	0	1	1	0	1	1	1	1	0	0	0	0	1	0	1	0	0	1	0	0	0	0	0	0	1	0	0	0	0	0	0
YGL104C	1	0	0	0	0	0	0	0	0	0	0	0	0	0	1	0	0	0	0	0	0	0	0	0	0	0	0	0	0	0	0	1	0	0	0	0	0	0	0	0	0	0	0	0	0	0	0	0	0
YGL105W	0	0	0	0	0	0	0	0	0	0	0	0	0	0	1	0	0	0	0	0	0	0	0	1	1	0	0	0	0	1	0	0	0	0	0	1	0	0	0	0	0	0	0	0	0	0	0	0	0
YGL106W	0	0	0	0	0	0	0	0	0	0	1	0	0	0	1	0	0	1	0	1	1	0	0	1	0	1	0	0	0	0	0	0	0	0	0	0	0	0	0	0	0	0	0	0	0	0	0	0	0
YGL107C	1	0	0	0	0	0	0	0	1	0	0	0	0	0	1	0	0	0	0	0	0	0	0	1	1	0	0	0	0	0	0	0	0	0	0	1	0	0	0	0	0	0	0	0	0	0	0	0	0
YGL108C	1	0	0	0	0	0	0	0	0	0	0	0	0	0	1	0	0	1	0	1	1	0	0	1	0	1	0	0	0	0	0	0	0	0	0	0	0	0	0	0	0	0	0	0	0	0	0	0	0
YGL110C	1	0	0	0	0	0	0	0	1	0	0	0	0	0	1	0	0	0	0	0	0	0	0	0	1	0	0	0	0	0	0	0	0	0	0	0	0	0	0	0	0	0	0	0	0	0	0	0	0
YGL111W	0	0	0	0	0	0	0	0	0	0	0	0	0	0	1	0	0	0	0	0	0	0	0	0	0	0	0	0	0	1	0	1	0	0	0	0	0	0	0	0	0	0	0	0	0	0	0	0	0
YGL112C	0	0	0	0	0	0	0	0	0	0	0	0	0	0	0	0	0	0	0	0	0	0	0	0	0	0	0	0	0	1	0	1	0	0	0	0	0	0	0	0	0	0	0	0	0	0	0	0	0
YGL113W	1	0	0	0	0	0	0	0	0	0	0	0	0	0	1	0	0	0	0	0	0	0	0	1	1	0	0	0	0	0	0	0	0	0	0	1	0	0	0	0	0	0	0	0	0	0	0	1	0
YGL114W	1	0	0	0	0	0	0	0	1	0	0	0	0	0	0	0	0	0	0	0	0	0	0	1	0	0	0	0	0	0	0	0	0	0	0	0	0	0	0	0	1	0	0	0	0	0	0	0	0
YGL115W	0	0	0	0	0	0	0	0	0	0	0	0	0	0	1	0	0	1	0	0	0	0	0	0	0	0	0	0	0	0	0	0	0	0	0	0	0	0	0	0	0	0	0	0	0	0	0	0	0
YGL116W	1	0	0	0	0	0	0	0	1	0	0	0	0	0	1	1	0	0	0	0	0	0	0	0	0	0	0	0	0	0	0	0	0	0	0	0	0	0	0	0	0	0	0	0	0	0	0	0	0
YGL117W	1	0	0	0	0	0	0	0	0	0	0	0	0	0	1	0	0	0	0	0	1	0	0	1	0	0	0	0	0	0	0	0	0	0	0	0	0	0	0	0	0	0	0	0	0	0	0	0	0
YGL119W	0	0	0	0	0	0	0	0	0	0	0	0	0	0	1	1	0	0	0	0	0	0	0	0	0	0	0	0	0	0	0	1	0	0	0	1	0	0	0	0	0	0	0	0	0	0	0	0	0
YGL120C	0	0	0	0	0	0	0	0	0	0	0	0	0	0	1	0	0	0	0	0	1	0	0	0	0	0	0	0	0	1	0	1	0	0	0	0	0	1	0	0	0	0	0	0	0	0	0	0	0
YGL121C	1	0	0	0	0	0	0	0	0	0	0	1	0	0	1	0	0	0	0	0	0	0	0	1	0	0	0	0	0	0	0	0	0	0	0	0	0	0	0	0	0	0	0	0	0	0	0	0	0
YGL122C	0	0	1	0	0	0	0	0	0	0	0	0	0	0	0	0	0	0	0	0	0	0	0	0	1	0	0	0	0	1	0	0	0	0	0	1	0	0	0	0	0	0	0	0	0	0	0	0	0
YGL123W	0	0	0	0	0	0	0	0	0	0	0	0	0	0	1	0	0	0	0	0	1	0	1	1	1	1	0	0	0	1	0	0	0	0	0	1	0	0	0	0	0	0	0	0	0	0	0	0	0
YGL124C	0	0	0	0	0	0	0	0	1	0	0	0	0	0	0	0	0	0	0	0	0	0	0	1	0	0	0	0	0	0	0	1	0	0	0	0	0	0	0	0	0	0	0	0	0	0	0	0	0
YGL125W	0	0	0	0	0	0	0	0	0	0	0	0	0	0	1	0	0	0	0	0	0	0	0	1	0	0	0	0	0	0	0	0	0	0	0	0	0	0	0	0	0	0	0	0	0	0	0	1	0
YGL126W	1	0	0	0	0	0	0	0	0	0	1	0	0	0	0	0	0	1	0	1	1	0	0	0	0	1	1	0	0	0	0	0	0	0	0	0	0	0	0	0	0	1	0	0	0	0	0	0	0
YGL127C	1	0	1	0	0	0	0	0	0	0	1	0	0	0	1	0	0	1	0	0	1	0	0	0	1	1	0	0	0	0	0	0	0	0	0	0	0	0	0	1	0	0	0	0	0	0	0	1	0
YGL128C	1	0	1	0	0	0	0	0	0	0	0	0	0	0	0	0	0	1	0	0	0	0	0	0	0	0	0	0	0	0	0	1	0	0	0	0	0	0	0	0	0	0	0	0	1	0	0	0	0
YGL129C	1	0	1	0	0	0	0	0	0	0	0	0	0	0	1	0	0	0	0	0	0	0	0	1	0	0	0	0	0	0	0	1	0	0	0	1	0	0	0	0	0	0	0	0	0	0	0	0	0
YGL130W	0	0	0	0	0	0	0	0	0	0	0	0	0	0	0	0	0	0	0	0	0	0	1	1	0	0	0	0	0	1	0	0	0	0	0	0	0	0	0	0	0	0	0	0	0	0	0	0	0
YGL131C	1	0	0	0	0	0	0	0	1	0	0	0	0	0	0	0	0	0	0	0	0	0	0	1	0	0	0	0	0	0	0	0	0	0	0	0	0	0	0	0	0	0	0	0	0	0	0	0	0
YGL132W	0	0	1	0	0	0	0	0	0	0	0	0	0	0	0	0	0	0	0	0	0	0	0	0	0	0	0	0	0	0	0	0	0	0	0	0	0	0	0	0	0	0	0	0	0	0	0	0	0
YGL133W	1	0	0	0	0	0	0	0	1	0	0	0	0	0	0	0	0	0	0	0	0	0	1	1	1	0	0	0	0	0	0	0	0	1	0	0	0	0	0	0	0	0	0	0	0	0	0	0	0
YGL134W	1	0	0	0	0	0	0	0	1	0	0	0	0	0	1	0	0	0	0	1	0	0	0	1	1	0	0	0	0	0	0	0	0	0	0	0	0	0	0	0	0	0	0	0	0	0	0	0	0
YGL135W	0	0	0	0	0	0	0	0	0	0	1	0	0	0	1	0	0	0	0	1	1	0	0	1	1	0	0	0	0	0	0	0	1	0	0	1	0	0	0	0	0	0	0	0	0	0	0	0	0
YGL136C	1	0	0	0	0	0	0	0	0	0	0	0	0	0	1	0	0	1	0	0	1	0	0	1	0	0	1	0	0	0	0	0	0	0	0	0	0	0	0	0	0	0	0	0	0	0	0	0	0
YGL137W	0	0	0	0	0	0	0	0	0	0	0	0	0	0	1	0	0	0	0	0	0	0	0	0	0	0	0	0	0	1	0	1	0	0	0	1	0	0	0	0	0	0	0	0	1	0	0	0	0
YGL139W	0	0	1	0	0	0	0	0	1	0	0	0	0	0	0	0	0	0	0	0	0	0	0	0	1	0	0	0	0	0	0	1	0	0	0	0	0	0	0	0	0	0	0	0	0	0	0	1	0
YGL140C	0	0	0	0	0	0	0	0	1	0	0	0	0	0	0	0	0	0	0	0	0	0	0	0	0	0	0	0	0	0	0	1	0	0	0	0	0	0	0	0	0	0	0	0	0	0	0	0	0
YGL141W	0	0	0	0	0	0	0	0	1	0	0	0	0	0	0	0	0	0	0	0	0	0	0	1	0	0	0	0	0	0	0	0	0	0	0	0	0	0	0	0	0	0	0	0	0	0	0	0	0
YGL142C	0	0	0	0	0	0	0	0	0	0	0	0	0	0	0	0	0	1	0	0	0	0	0	1	0	0	0	0	0	0	0	1	0	0	0	0	0	0	0	0	0	0	0	0	0	0	0	1	0
YGL143C	1	0	0	0	0	0	0	0	0	0	0	0	0	0	1	0	0	0	0	0	0	0	0	0	0	0	0	0	0	0	0	0	0	0	0	1	0	0	0	0	0	0	0	0	0	0	0	0	0
YGL144C	0	0	0	0	0	0	0	0	1	0	0	0	0	0	0	0	0	0	0	0	0	0	0	0	0	0	0	0	0	0	0	0	0	0	0	0	0	0	0	0	0	0	0	0	0	0	0	0	0
YGL145W	1	0	0	0	0	0	0	0	1	0	0	0	0	0	1	0	0	0	0	0	0	0	1	0	1	0	0	0	0	0	0	1	0	0	0	0	0	0	0	0	0	0	0	0	0	0	0	0	0
YGL146C	1	0	1	0	0	0	0	0	0	0	0	0	0	0	0	0	0	0	0	0	1	0	0	0	0	0	0	0	0	0	0	0	0	0	0	0	0	0	0	0	0	0	0	0	0	0	0	0	0
YGL147C	0	0	0	0	0	0	0	0	0	0	1	0	0	0	0	0	0	0	0	1	1	0	1	1	1	0	0	0	0	0	0	0	0	0	0	1	0	0	1	0	0	0	0	0	0	0	0	0	0
YGL148W	0	0	0	0	0	0	0	0	0	0	0	0	0	0	1	0	0	1	0	0	0	0	1	1	1	1	0	0	0	1	0	1	0	0	0	0	0	0	0	0	0	0	0	0	0	0	0	0	0
YGL150C	0	0	0	0	0	0	0	0	1	0	0	0	0	0	1	0	0	0	0	0	0	0	0	1	0	0	0	0	0	0	0	1	0	0	0	1	0	0	0	0	0	0	0	0	0	0	0	1	0
YGL151W	0	0	1	0	0	0	0	0	1	0	0	0	0	0	1	0	0	0	0	0	0	0	0	1	0	0	0	0	0	1	0	1	0	0	0	1	0	0	0	0	0	0	0	0	0	0	0	0	0
YGL152C	0	0	0	0	0	0	0	0	0	0	0	0	0	0	0	0	0	0	0	0	0	0	0	0	1	0	0	0	0	0	0	0	0	0	0	0	0	0	0	0	0	0	0	0	0	0	0	0	0
YGL153W	1	0	0	0	0	0	0	0	0	1	0	0	0	0	1	0	0	1	0	0	0	0	1	1	1	1	0	0	0	0	0	0	0	0	0	0	0	0	0	0	0	0	0	0	0	0	0	0	0
YGL154C	1	0	0	0	0	0	0	0	0	0	0	0	0	0	0	0	0	0	0	0	0	0	0	1	0	0	0	0	0	0	0	0	0	0	0	0	0	0	0	0	0	0	0	0	1	0	0	1	0
YGL155W	1	0	0	0	0	0	0	0	1	0	0	0	0	0	1	0	0	0	0	0	0	0	0	0	0	0	1	0	0	0	0	0	0	0	0	0	0	0	0	0	0	0	0	0	0	0	0	0	0
YGL156W	1	0	0	0	0	0	0	0	0	0	0	0	0	0	0	0	0	0	0	0	1	0	0	0	0	0	0	0	0	0	0	0	0	0	0	1	0	0	0	0	0	0	0	0	1	0	0	0	0
YGL157W	0	0	0	0	0	0	0	0	0	0	1	0	0	0	1	0	0	0	0	0	0	0	0	1	0	0	0	0	0	0	0	0	0	0	0	0	0	1	0	0	0	0	0	0	0	0	0	0	0
YGL158W	0	0	0	0	0	0	0	0	0	0	0	0	0	0	0	0	0	0	0	0	0	0	0	0	0	0	0	0	0	0	0	0	0	0	0	0	0	0	0	0	0	0	0	0	0	0	0	0	0
YGL159W	1	0	0	0	0	0	0	0	0	0	1	0	0	0	1	0	0	0	0	0	1	0	0	0	0	0	0	0	0	0	0	1	0	0	0	0	0	0	0	0	0	0	0	0	0	0	0	0	0
YGL160W	1	0	1	0	0	0	0	0	1	0	0	0	0	0	0	0	0	0	0	0	0	0	0	1	0	0	0	0	0	0	0	1	0	0	0	0	0	0	0	0	1	0	0	0	0	0	0	0	0
YGL161C	1	0	0	0	0	0	0	0	0	0	1	0	0	0	1	0	0	0	0	1	1	0	1	0	0	1	0	0	0	0	0	0	0	0	0	0	0	0	0	0	0	0	0	0	0	0	0	1	0
YGL162W	1	0	1	0	0	0	0	0	0	0	0	0	0	0	1	0	0	0	0	0	0	0	0	0	1	0	0	0	0	0	0	0	0	0	0	0	0	0	0	0	0	0	0	0	0	0	0	0	0
YGL163C	1	0	0	0	0	0	0	0	1	0	0	0	0	0	1	0	0	0	0	0	0	0	0	0	0	0	0	0	0	0	0	0	0	0	0	0	0	0	0	0	0	0	0	0	0	0	0	0	0
YGL164C	1	0	0	0	0	0	0	0	0	1	0	0	0	0	1	0	0	0	0	0	0	0	0	0	0	0	0	0	0	0	0	0	0	0	0	0	0	0	0	0	0	0	0	0	0	0	0	0	0
YGL166W	1	0	0	0	0	0	0	0	0	0	1	0	0	0	1	0	0	1	0	1	1	0	0	0	1	1	0	0	0	0	0	0	0	0	0	0	0	0	0	0	0	0	0	0	0	0	0	0	0
YGL167C	0	0	0	0	0	0	0	0	1	0	0	0	0	0	1	0	0	0	0	0	1	0	0	0	0	0	1	0	0	1	0	1	0	0	0	0	0	0	0	0	0	0	0	0	0	0	0	1	0
YGL168W	0	0	0	0	0	0	0	0	0	0	0	0	0	0	0	0	0	0	0	0	0	0	0	0	0	0	0	0	0	0	0	1	0	0	0	0	0	0	0	0	0	0	0	0	0	0	0	0	0
YGL169W	1	0	0	0	0	0	0	0	0	0	0	0	0	0	1	0	0	0	0	0	0	0	0	0	0	0	0	0	0	0	0	0	0	0	0	0	0	0	0	0	0	0	0	0	0	0	0	0	0
YGL171W	0	0	0	0	0	0	0	0	0	0	0	0	0	0	1	0	0	0	0	0	1	0	0	0	0	0	0	0	0	1	0	0	0	0	0	1	0	0	0	0	0	0	0	0	0	0	0	0	0
YGL172W	1	0	0	0	0	0	0	0	1	0	0	0	0	0	1	0	0	0	0	0	0	0	0	0	0	0	0	0	0	0	0	0	0	0	0	0	0	0	0	0	0	0	0	0	0	0	0	0	0
YGL173C	0	0	0	0	0	0	0	0	1	0	0	0	0	0	1	0	0	0	0	0	0	0	0	1	0	0	0	0	0	1	0	1	0	0	0	1	0	0	0	1	0	0	0	0	0	0	0	0	0
YGL174W	1	0	0	0	0	0	0	0	0	0	0	0	0	0	1	0	0	0	0	0	0	0	0	0	0	0	0	0	0	0	0	0	0	0	0	0	0	0	0	0	0	0	0	0	0	0	0	0	0
[truncated: 3,947 more rows]
[truncated: 16 more columns]

## Sheet: 4. Colony size assay
# Table S4: Colony data
# colonyID: UID for each colony
# scanID: UID for each dissection batch
# dis_plate_num: dissection plate number
# plate position: colony position in the 4 x 8 grid. each column is a different tetrad.
# genotype: colony genotype
# aneu: "0" indicates euploid; "1" indicates aneuploid
# row: colony row position
# col: colony column position
# size: colony size (output from gitter)
# tetrad: ID of tetrad (within batch) that colony belongs to
# colony: colony position in the format plate.column.row
# parent_genotype: genotype of parent strain
# query_mutant: RBP of interest
# ploidy: haploid or diploid colony, based on HO genotype of parent
colonyID	scanID	dis_plate_num	plate_position	genotype	aneu	row	col	size	tetrad	colony	parent_genotype	query_mutant	ploidy
65	2	1	pos1	ssd1_mpt5	0	1	1	212	1.1	1.1.1	MPT5/mpt5- SSD1/ssd1- 3n.Chr12	mpt5	diploid
66	2	1	pos2	mpt5	1	2	1	233	1.1	1.1.2	MPT5/mpt5- SSD1/ssd1- 3n.Chr12	mpt5	diploid
67	2	1	pos3	ssd1	0	3	1	333	1.1	1.1.3	MPT5/mpt5- SSD1/ssd1- 3n.Chr12	mpt5	diploid
68	2	1	pos4	WT	1	4	1	293	1.1	1.1.4	MPT5/mpt5- SSD1/ssd1- 3n.Chr12	mpt5	diploid
69	2	1	pos5	ssd1_mpt5	1	1	2	37	1.2	1.2.1	MPT5/mpt5- SSD1/ssd1- 3n.Chr12	mpt5	diploid
70	2	1	pos6	WT	0	2	2	299	1.2	1.2.2	MPT5/mpt5- SSD1/ssd1- 3n.Chr12	mpt5	diploid
71	2	1	pos7	ssd1	1	3	2	101	1.2	1.2.3	MPT5/mpt5- SSD1/ssd1- 3n.Chr12	mpt5	diploid
72	2	1	pos8	mpt5	0	4	2	364	1.2	1.2.4	MPT5/mpt5- SSD1/ssd1- 3n.Chr12	mpt5	diploid
77	2	1	pos13	WT	0	1	4	279	1.4	1.4.1	MPT5/mpt5- SSD1/ssd1- 3n.Chr12	mpt5	diploid
78	2	1	pos14	ssd1	0	2	4	317	1.4	1.4.2	MPT5/mpt5- SSD1/ssd1- 3n.Chr12	mpt5	diploid
79	2	1	pos15	mpt5	1	3	4	306	1.4	1.4.3	MPT5/mpt5- SSD1/ssd1- 3n.Chr12	mpt5	diploid
80	2	1	pos16	ssd1_mpt5	1	4	4	30	1.4	1.4.4	MPT5/mpt5- SSD1/ssd1- 3n.Chr12	mpt5	diploid
81	2	1	pos17	mpt5	1	1	5	279	1.5	1.5.1	MPT5/mpt5- SSD1/ssd1- 3n.Chr12	mpt5	diploid
82	2	1	pos18	ssd1	0	2	5	342	1.5	1.5.2	MPT5/mpt5- SSD1/ssd1- 3n.Chr12	mpt5	diploid
83	2	1	pos19	ssd1	1	3	5	100	1.5	1.5.3	MPT5/mpt5- SSD1/ssd1- 3n.Chr12	mpt5	diploid
84	2	1	pos20	mpt5	0	4	5	395	1.5	1.5.4	MPT5/mpt5- SSD1/ssd1- 3n.Chr12	mpt5	diploid
85	2	1	pos21	mpt5	0	1	6	389	1.6	1.6.1	MPT5/mpt5- SSD1/ssd1- 3n.Chr12	mpt5	diploid
86	2	1	pos22	WT	1	2	6	214	1.6	1.6.2	MPT5/mpt5- SSD1/ssd1- 3n.Chr12	mpt5	diploid
87	2	1	pos23	ssd1_mpt5	1	3	6	7	1.6	1.6.3	MPT5/mpt5- SSD1/ssd1- 3n.Chr12	mpt5	diploid
88	2	1	pos24	ssd1	0	4	6	359	1.6	1.6.4	MPT5/mpt5- SSD1/ssd1- 3n.Chr12	mpt5	diploid
93	2	1	pos29	mpt5	0	1	8	360	1.8	1.8.1	MPT5/mpt5- SSD1/ssd1- 3n.Chr12	mpt5	diploid
94	2	1	pos30	ssd1	1	2	8	75	1.8	1.8.2	MPT5/mpt5- SSD1/ssd1- 3n.Chr12	mpt5	diploid
95	2	1	pos31	WT	1	3	8	286	1.8	1.8.3	MPT5/mpt5- SSD1/ssd1- 3n.Chr12	mpt5	diploid
96	2	1	pos32	ssd1_mpt5	0	4	8	224	1.8	1.8.4	MPT5/mpt5- SSD1/ssd1- 3n.Chr12	mpt5	diploid
97	2	2	pos1	ssd1_mpt5	0	1	1	244	2.1	2.1.1	MPT5/mpt5- SSD1/ssd1- 3n.Chr12	mpt5	diploid
98	2	2	pos2	WT	1	2	1	267	2.1	2.1.2	MPT5/mpt5- SSD1/ssd1- 3n.Chr12	mpt5	diploid
99	2	2	pos3	mpt5	1	3	1	242	2.1	2.1.3	MPT5/mpt5- SSD1/ssd1- 3n.Chr12	mpt5	diploid
100	2	2	pos4	ssd1	0	4	1	363	2.1	2.1.4	MPT5/mpt5- SSD1/ssd1- 3n.Chr12	mpt5	diploid
105	2	2	pos9	mpt5	1	1	3	243	2.3	2.3.1	MPT5/mpt5- SSD1/ssd1- 3n.Chr12	mpt5	diploid
106	2	2	pos10	ssd1_mpt5	1	2	3	17	2.3	2.3.2	MPT5/mpt5- SSD1/ssd1- 3n.Chr12	mpt5	diploid
107	2	2	pos11	ssd1	0	3	3	350	2.3	2.3.3	MPT5/mpt5- SSD1/ssd1- 3n.Chr12	mpt5	diploid
108	2	2	pos12	WT	0	4	3	369	2.3	2.3.4	MPT5/mpt5- SSD1/ssd1- 3n.Chr12	mpt5	diploid
109	2	2	pos13	WT	0	1	4	343	2.4	2.4.1	MPT5/mpt5- SSD1/ssd1- 3n.Chr12	mpt5	diploid
110	2	2	pos14	WT	0	2	4	350	2.4	2.4.2	MPT5/mpt5- SSD1/ssd1- 3n.Chr12	mpt5	diploid
111	2	2	pos15	ssd1_mpt5	1	3	4	23	2.4	2.4.3	MPT5/mpt5- SSD1/ssd1- 3n.Chr12	mpt5	diploid
112	2	2	pos16	ssd1_mpt5	1	4	4	20	2.4	2.4.4	MPT5/mpt5- SSD1/ssd1- 3n.Chr12	mpt5	diploid
117	2	2	pos21	ssd1	0	1	6	325	2.6	2.6.1	MPT5/mpt5- SSD1/ssd1- 3n.Chr12	mpt5	diploid
118	2	2	pos22	WT	0	2	6	338	2.6	2.6.2	MPT5/mpt5- SSD1/ssd1- 3n.Chr12	mpt5	diploid
119	2	2	pos23	ssd1_mpt5	1	3	6	31	2.6	2.6.3	MPT5/mpt5- SSD1/ssd1- 3n.Chr12	mpt5	diploid
120	2	2	pos24	mpt5	1	4	6	276	2.6	2.6.4	MPT5/mpt5- SSD1/ssd1- 3n.Chr12	mpt5	diploid
2681	21	1	pos9	ssd1	0	1	3	378	1.3	1.3.1	PUB1/pub1- SSD1/ssd1- 3n.Chr12	pub1	diploid
2684	21	1	pos12	ssd1_pub1	1	4	3	136	1.3	1.3.4	PUB1/pub1- SSD1/ssd1- 3n.Chr12	pub1	diploid
2685	21	1	pos17	ssd1_pub1	1	1	5	129	1.5	1.5.1	PUB1/pub1- SSD1/ssd1- 3n.Chr12	pub1	diploid
2686	21	1	pos18	WT	0	2	5	402	1.5	1.5.2	PUB1/pub1- SSD1/ssd1- 3n.Chr12	pub1	diploid
2687	21	1	pos19	ssd1_pub1	1	3	5	128	1.5	1.5.3	PUB1/pub1- SSD1/ssd1- 3n.Chr12	pub1	diploid
2688	21	1	pos20	WT	0	4	5	443	1.5	1.5.4	PUB1/pub1- SSD1/ssd1- 3n.Chr12	pub1	diploid
2689	21	1	pos21	pub1	1	1	6	303	1.6	1.6.1	PUB1/pub1- SSD1/ssd1- 3n.Chr12	pub1	diploid
2690	21	1	pos22	ssd1	0	2	6	349	1.6	1.6.2	PUB1/pub1- SSD1/ssd1- 3n.Chr12	pub1	diploid
2691	21	1	pos23	pub1	1	3	6	272	1.6	1.6.3	PUB1/pub1- SSD1/ssd1- 3n.Chr12	pub1	diploid
2692	21	1	pos24	ssd1	0	4	6	380	1.6	1.6.4	PUB1/pub1- SSD1/ssd1- 3n.Chr12	pub1	diploid
2693	21	1	pos25	ssd1_pub1	1	1	7	123	1.7	1.7.1	PUB1/pub1- SSD1/ssd1- 3n.Chr12	pub1	diploid
2695	21	1	pos27	ssd1_pub1	0	3	7	342	1.7	1.7.3	PUB1/pub1- SSD1/ssd1- 3n.Chr12	pub1	diploid
2698	21	2	pos2	ssd1_pub1	0	2	1	278	2.1	2.1.2	PUB1/pub1- SSD1/ssd1- 3n.Chr12	pub1	diploid
2701	21	2	pos5	ssd1_pub1	0	1	2	268	2.2	2.2.1	PUB1/pub1- SSD1/ssd1- 3n.Chr12	pub1	diploid
2702	21	2	pos6	WT	1	2	2	313	2.2	2.2.2	PUB1/pub1- SSD1/ssd1- 3n.Chr12	pub1	diploid
2703	21	2	pos7	WT	1	3	2	321	2.2	2.2.3	PUB1/pub1- SSD1/ssd1- 3n.Chr12	pub1	diploid
2704	21	2	pos8	ssd1_pub1	0	4	2	332	2.2	2.2.4	PUB1/pub1- SSD1/ssd1- 3n.Chr12	pub1	diploid
2707	21	2	pos11	ssd1_pub1	0	3	3	319	2.3	2.3.3	PUB1/pub1- SSD1/ssd1- 3n.Chr12	pub1	diploid
2708	21	2	pos12	ssd1	1	4	3	84	2.3	2.3.4	PUB1/pub1- SSD1/ssd1- 3n.Chr12	pub1	diploid
2709	21	2	pos17	ssd1	1	1	5	80	2.5	2.5.1	PUB1/pub1- SSD1/ssd1- 3n.Chr12	pub1	diploid
2710	21	2	pos18	ssd1	1	2	5	76	2.5	2.5.2	PUB1/pub1- SSD1/ssd1- 3n.Chr12	pub1	diploid
2711	21	2	pos19	pub1	0	3	5	357	2.5	2.5.3	PUB1/pub1- SSD1/ssd1- 3n.Chr12	pub1	diploid
2712	21	2	pos20	pub1	0	4	5	328	2.5	2.5.4	PUB1/pub1- SSD1/ssd1- 3n.Chr12	pub1	diploid
2715	21	2	pos27	ssd1_pub1	0	3	7	324	2.7	2.7.3	PUB1/pub1- SSD1/ssd1- 3n.Chr12	pub1	diploid
2716	21	2	pos28	ssd1	1	4	7	90	2.7	2.7.4	PUB1/pub1- SSD1/ssd1- 3n.Chr12	pub1	diploid
2719	21	3	pos7	ssd1	0	3	2	359	3.2	3.2.3	PUB1/pub1- SSD1/ssd1- 3n.Chr12	pub1	diploid
2720	21	3	pos8	ssd1_pub1	1	4	2	106	3.2	3.2.4	PUB1/pub1- SSD1/ssd1- 3n.Chr12	pub1	diploid
2721	21	3	pos9	pub1	1	1	3	270	3.3	3.3.1	PUB1/pub1- SSD1/ssd1- 3n.Chr12	pub1	diploid
2722	21	3	pos10	pub1	1	2	3	286	3.3	3.3.2	PUB1/pub1- SSD1/ssd1- 3n.Chr12	pub1	diploid
2723	21	3	pos11	ssd1	0	3	3	417	3.3	3.3.3	PUB1/pub1- SSD1/ssd1- 3n.Chr12	pub1	diploid
2724	21	3	pos12	ssd1	0	4	3	302	3.3	3.3.4	PUB1/pub1- SSD1/ssd1- 3n.Chr12	pub1	diploid
2725	21	3	pos17	ssd1	0	1	5	443	3.5	3.5.1	PUB1/pub1- SSD1/ssd1- 3n.Chr12	pub1	diploid
2726	21	3	pos18	ssd1_pub1	1	2	5	118	3.5	3.5.2	PUB1/pub1- SSD1/ssd1- 3n.Chr12	pub1	diploid
2730	21	3	pos26	ssd1	1	2	7	84	3.7	3.7.2	PUB1/pub1- SSD1/ssd1- 3n.Chr12	pub1	diploid
2732	21	3	pos28	ssd1_pub1	0	4	7	354	3.7	3.7.4	PUB1/pub1- SSD1/ssd1- 3n.Chr12	pub1	diploid
2734	21	3	pos30	ssd1_pub1	1	2	8	128	3.8	3.8.2	PUB1/pub1- SSD1/ssd1- 3n.Chr12	pub1	diploid
2736	21	3	pos32	ssd1	0	4	8	327	3.8	3.8.4	PUB1/pub1- SSD1/ssd1- 3n.Chr12	pub1	diploid
2737	22	1	pos1	ssd1	0	1	1	352	1.1	1.1.1	NAB6/nab6- SSD1/ssd1- 3n.Chr12	nab6	diploid
2740	22	1	pos4	ssd1_nab6	1	4	1	136	1.1	1.1.4	NAB6/nab6- SSD1/ssd1- 3n.Chr12	nab6	diploid
2742	22	1	pos6	ssd1	0	2	2	328	1.2	1.2.2	NAB6/nab6- SSD1/ssd1- 3n.Chr12	nab6	diploid
2743	22	1	pos7	ssd1	1	3	2	38	1.2	1.2.3	NAB6/nab6- SSD1/ssd1- 3n.Chr12	nab6	diploid
2745	22	1	pos9	ssd1_nab6	1	1	3	155	1.3	1.3.1	NAB6/nab6- SSD1/ssd1- 3n.Chr12	nab6	diploid
2747	22	1	pos11	ssd1	0	3	3	364	1.3	1.3.3	NAB6/nab6- SSD1/ssd1- 3n.Chr12	nab6	diploid
2751	22	1	pos15	ssd1	1	3	4	61	1.4	1.4.3	NAB6/nab6- SSD1/ssd1- 3n.Chr12	nab6	diploid
2752	22	1	pos16	ssd1_nab6	0	4	4	406	1.4	1.4.4	NAB6/nab6- SSD1/ssd1- 3n.Chr12	nab6	diploid
2755	22	1	pos19	ssd1_nab6	0	3	5	374	1.5	1.5.3	NAB6/nab6- SSD1/ssd1- 3n.Chr12	nab6	diploid
2756	22	1	pos20	ssd1	1	4	5	129	1.5	1.5.4	NAB6/nab6- SSD1/ssd1- 3n.Chr12	nab6	diploid
2758	22	1	pos22	ssd1_nab6	0	2	6	367	1.6	1.6.2	NAB6/nab6- SSD1/ssd1- 3n.Chr12	nab6	diploid
2759	22	1	pos23	ssd1_nab6	1	3	6	123	1.6	1.6.3	NAB6/nab6- SSD1/ssd1- 3n.Chr12	nab6	diploid
2762	22	1	pos26	ssd1	0	2	7	376	1.7	1.7.2	NAB6/nab6- SSD1/ssd1- 3n.Chr12	nab6	diploid
2764	22	1	pos28	ssd1	1	4	7	73	1.7	1.7.4	NAB6/nab6- SSD1/ssd1- 3n.Chr12	nab6	diploid
2765	22	2	pos1	ssd1	1	1	1	86	2.1	2.1.1	NAB6/nab6- SSD1/ssd1- 3n.Chr12	nab6	diploid
2766	22	2	pos2	ssd1_nab6	0	2	1	370	2.1	2.1.2	NAB6/nab6- SSD1/ssd1- 3n.Chr12	nab6	diploid
2770	22	2	pos10	ssd1_nab6	0	2	3	397	2.3	2.3.2	NAB6/nab6- SSD1/ssd1- 3n.Chr12	nab6	diploid
2771	22	2	pos11	ssd1_nab6	1	3	3	129	2.3	2.3.3	NAB6/nab6- SSD1/ssd1- 3n.Chr12	nab6	diploid
2773	22	2	pos13	nab6	0	1	4	338	2.4	2.4.1	NAB6/nab6- SSD1/ssd1- 3n.Chr12	nab6	diploid
2774	22	2	pos14	ssd1	1	2	4	89	2.4	2.4.2	NAB6/nab6- SSD1/ssd1- 3n.Chr12	nab6	diploid
2775	22	2	pos15	nab6	0	3	4	354	2.4	2.4.3	NAB6/nab6- SSD1/ssd1- 3n.Chr12	nab6	diploid
2776	22	2	pos16	ssd1	1	4	4	80	2.4	2.4.4	NAB6/nab6- SSD1/ssd1- 3n.Chr12	nab6	diploid
2777	22	2	pos25	ssd1	1	1	7	66	2.7	2.7.1	NAB6/nab6- SSD1/ssd1- 3n.Chr12	nab6	diploid
2778	22	2	pos26	ssd1_nab6	0	2	7	335	2.7	2.7.2	NAB6/nab6- SSD1/ssd1- 3n.Chr12	nab6	diploid
2782	22	2	pos30	ssd1_nab6	0	2	8	302	2.8	2.8.2	NAB6/nab6- SSD1/ssd1- 3n.Chr12	nab6	diploid
2784	22	2	pos32	ssd1_nab6	1	4	8	141	2.8	2.8.4	NAB6/nab6- SSD1/ssd1- 3n.Chr12	nab6	diploid
2785	22	3	pos1	nab6	1	1	1	261	3.1	3.1.1	NAB6/nab6- SSD1/ssd1- 3n.Chr12	nab6	diploid
2786	22	3	pos2	ssd1_nab6	0	2	1	372	3.1	3.1.2	NAB6/nab6- SSD1/ssd1- 3n.Chr12	nab6	diploid
2787	22	3	pos3	WT	1	3	1	270	3.1	3.1.3	NAB6/nab6- SSD1/ssd1- 3n.Chr12	nab6	diploid
2788	22	3	pos4	ssd1	0	4	1	378	3.1	3.1.4	NAB6/nab6- SSD1/ssd1- 3n.Chr12	nab6	diploid
2789	22	3	pos5	nab6	1	1	2	287	3.2	3.2.1	NAB6/nab6- SSD1/ssd1- 3n.Chr12	nab6	diploid
2790	22	3	pos6	ssd1	0	2	2	364	3.2	3.2.2	NAB6/nab6- SSD1/ssd1- 3n.Chr12	nab6	diploid
2791	22	3	pos7	nab6	1	3	2	282	3.2	3.2.3	NAB6/nab6- SSD1/ssd1- 3n.Chr12	nab6	diploid
2792	22	3	pos8	ssd1	0	4	2	374	3.2	3.2.4	NAB6/nab6- SSD1/ssd1- 3n.Chr12	nab6	diploid
2793	22	3	pos9	ssd1_nab6	0	1	3	409	3.3	3.3.1	NAB6/nab6- SSD1/ssd1- 3n.Chr12	nab6	diploid
2795	22	3	pos11	ssd1_nab6	1	3	3	132	3.3	3.3.3	NAB6/nab6- SSD1/ssd1- 3n.Chr12	nab6	diploid
2799	22	3	pos19	ssd1	0	3	5	408	3.5	3.5.3	NAB6/nab6- SSD1/ssd1- 3n.Chr12	nab6	diploid
2800	22	3	pos20	ssd1_nab6	1	4	5	155	3.5	3.5.4	NAB6/nab6- SSD1/ssd1- 3n.Chr12	nab6	diploid
2801	22	3	pos29	ssd1	1	1	8	100	3.8	3.8.1	NAB6/nab6- SSD1/ssd1- 3n.Chr12	nab6	diploid
2803	22	3	pos31	ssd1_nab6	0	3	8	314	3.8	3.8.3	NAB6/nab6- SSD1/ssd1- 3n.Chr12	nab6	diploid
2805	22	4	pos5	ssd1_nab6	1	1	2	109	4.2	4.2.1	NAB6/nab6- SSD1/ssd1- 3n.Chr12	nab6	diploid
2808	22	4	pos8	ssd1_nab6	0	4	2	381	4.2	4.2.4	NAB6/nab6- SSD1/ssd1- 3n.Chr12	nab6	diploid
2810	22	4	pos14	ssd1	1	2	4	65	4.4	4.4.2	NAB6/nab6- SSD1/ssd1- 3n.Chr12	nab6	diploid
2811	22	4	pos15	ssd1_nab6	0	3	4	364	4.4	4.4.3	NAB6/nab6- SSD1/ssd1- 3n.Chr12	nab6	diploid
2813	22	4	pos17	ssd1	0	1	5	381	4.5	4.5.1	NAB6/nab6- SSD1/ssd1- 3n.Chr12	nab6	diploid
2814	22	4	pos18	ssd1_nab6	1	2	5	113	4.5	4.5.2	NAB6/nab6- SSD1/ssd1- 3n.Chr12	nab6	diploid
2818	22	4	pos22	ssd1	1	2	6	52	4.6	4.6.2	NAB6/nab6- SSD1/ssd1- 3n.Chr12	nab6	diploid
2819	22	4	pos23	ssd1_nab6	0	3	6	358	4.6	4.6.3	NAB6/nab6- SSD1/ssd1- 3n.Chr12	nab6	diploid
2821	22	4	pos29	ssd1	0	1	8	317	4.8	4.8.1	NAB6/nab6- SSD1/ssd1- 3n.Chr12	nab6	diploid
2822	22	4	pos30	WT	1	2	8	283	4.8	4.8.2	NAB6/nab6- SSD1/ssd1- 3n.Chr12	nab6	diploid
2823	22	4	pos31	ssd1_nab6	0	3	8	360	4.8	4.8.3	NAB6/nab6- SSD1/ssd1- 3n.Chr12	nab6	diploid
2824	22	4	pos32	nab6	1	4	8	298	4.8	4.8.4	NAB6/nab6- SSD1/ssd1- 3n.Chr12	nab6	diploid
2825	22	5	pos1	ssd1_nab6	0	1	1	354	5.1	5.1.1	NAB6/nab6- SSD1/ssd1- 3n.Chr12	nab6	diploid
2826	22	5	pos2	WT	1	2	1	282	5.1	5.1.2	NAB6/nab6- SSD1/ssd1- 3n.Chr12	nab6	diploid
2827	22	5	pos3	ssd1	0	3	1	351	5.1	5.1.3	NAB6/nab6- SSD1/ssd1- 3n.Chr12	nab6	diploid
2828	22	5	pos4	nab6	1	4	1	277	5.1	5.1.4	NAB6/nab6- SSD1/ssd1- 3n.Chr12	nab6	diploid
2829	22	5	pos5	ssd1	0	1	2	363	5.2	5.2.1	NAB6/nab6- SSD1/ssd1- 3n.Chr12	nab6	diploid
2830	22	5	pos6	nab6	1	2	2	227	5.2	5.2.2	NAB6/nab6- SSD1/ssd1- 3n.Chr12	nab6	diploid
2831	22	5	pos7	ssd1_nab6	0	3	2	286	5.2	5.2.3	NAB6/nab6- SSD1/ssd1- 3n.Chr12	nab6	diploid
2832	22	5	pos8	WT	1	4	2	266	5.2	5.2.4	NAB6/nab6- SSD1/ssd1- 3n.Chr12	nab6	diploid
2833	22	5	pos9	ssd1_nab6	0	1	3	423	5.3	5.3.1	NAB6/nab6- SSD1/ssd1- 3n.Chr12	nab6	diploid
2834	22	5	pos10	ssd1	1	2	3	75	5.3	5.3.2	NAB6/nab6- SSD1/ssd1- 3n.Chr12	nab6	diploid
2837	22	5	pos21	WT	0	1	6	350	5.6	5.6.1	NAB6/nab6- SSD1/ssd1- 3n.Chr12	nab6	diploid
2838	22	5	pos22	nab6	0	2	6	335	5.6	5.6.2	NAB6/nab6- SSD1/ssd1- 3n.Chr12	nab6	diploid
2839	22	5	pos23	ssd1_nab6	1	3	6	134	5.6	5.6.3	NAB6/nab6- SSD1/ssd1- 3n.Chr12	nab6	diploid
2840	22	5	pos24	ssd1	1	4	6	66	5.6	5.6.4	NAB6/nab6- SSD1/ssd1- 3n.Chr12	nab6	diploid
2843	22	5	pos27	ssd1	1	3	7	61	5.7	5.7.3	NAB6/nab6- SSD1/ssd1- 3n.Chr12	nab6	diploid
2844	22	5	pos28	ssd1_nab6	0	4	7	420	5.7	5.7.4	NAB6/nab6- SSD1/ssd1- 3n.Chr12	nab6	diploid
2847	22	5	pos31	ssd1	1	3	8	84	5.8	5.8.3	NAB6/nab6- SSD1/ssd1- 3n.Chr12	nab6	diploid
2848	22	5	pos32	ssd1_nab6	0	4	8	348	5.8	5.8.4	NAB6/nab6- SSD1/ssd1- 3n.Chr12	nab6	diploid
2851	22	6	pos3	ssd1_nab6	1	3	1	127	6.1	6.1.3	NAB6/nab6- SSD1/ssd1- 3n.Chr12	nab6	diploid
2852	22	6	pos4	ssd1_nab6	0	4	1	408	6.1	6.1.4	NAB6/nab6- SSD1/ssd1- 3n.Chr12	nab6	diploid
2855	22	6	pos7	ssd1_nab6	1	3	2	135	6.2	6.2.3	NAB6/nab6- SSD1/ssd1- 3n.Chr12	nab6	diploid
2859	22	6	pos19	ssd1_nab6	0	3	5	371	6.5	6.5.3	NAB6/nab6- SSD1/ssd1- 3n.Chr12	nab6	diploid
2860	22	6	pos20	ssd1	1	4	5	94	6.5	6.5.4	NAB6/nab6- SSD1/ssd1- 3n.Chr12	nab6	diploid
2862	22	6	pos26	ssd1_nab6	0	2	7	417	6.7	6.7.2	NAB6/nab6- SSD1/ssd1- 3n.Chr12	nab6	diploid
2863	22	6	pos27	ssd1_nab6	1	3	7	128	6.7	6.7.3	NAB6/nab6- SSD1/ssd1- 3n.Chr12	nab6	diploid
2867	22	6	pos31	ssd1	1	3	8	62	6.8	6.8.3	NAB6/nab6- SSD1/ssd1- 3n.Chr12	nab6	diploid
2868	22	6	pos32	ssd1_nab6	0	4	8	392	6.8	6.8.4	NAB6/nab6- SSD1/ssd1- 3n.Chr12	nab6	diploid
2870	23	1	pos2	ssd1_gis2	1	2	1	73	1.1	1.1.2	GIS2/gis2- SSD1/ssd1- 3n.Chr12	gis2	diploid
2871	23	1	pos3	ssd1_gis2	0	3	1	385	1.1	1.1.3	GIS2/gis2- SSD1/ssd1- 3n.Chr12	gis2	diploid
2873	23	1	pos5	ssd1_gis2	1	1	2	64	1.2	1.2.1	GIS2/gis2- SSD1/ssd1- 3n.Chr12	gis2	diploid
2876	23	1	pos8	ssd1	0	4	2	419	1.2	1.2.4	GIS2/gis2- SSD1/ssd1- 3n.Chr12	gis2	diploid
2878	23	1	pos10	ssd1	1	2	3	77	1.3	1.3.2	GIS2/gis2- SSD1/ssd1- 3n.Chr12	gis2	diploid
2880	23	1	pos12	ssd1_gis2	0	4	3	372	1.3	1.3.4	GIS2/gis2- SSD1/ssd1- 3n.Chr12	gis2	diploid
2881	23	1	pos13	ssd1	0	1	4	376	1.4	1.4.1	GIS2/gis2- SSD1/ssd1- 3n.Chr12	gis2	diploid
2882	23	1	pos14	WT	1	2	4	312	1.4	1.4.2	GIS2/gis2- SSD1/ssd1- 3n.Chr12	gis2	diploid
2883	23	1	pos15	ssd1_gis2	0	3	4	331	1.4	1.4.3	GIS2/gis2- SSD1/ssd1- 3n.Chr12	gis2	diploid
2884	23	1	pos16	gis2	1	4	4	295	1.4	1.4.4	GIS2/gis2- SSD1/ssd1- 3n.Chr12	gis2	diploid
2886	23	1	pos18	ssd1	0	2	5	404	1.5	1.5.2	GIS2/gis2- SSD1/ssd1- 3n.Chr12	gis2	diploid
2888	23	1	pos20	ssd1_gis2	1	4	5	102	1.5	1.5.4	GIS2/gis2- SSD1/ssd1- 3n.Chr12	gis2	diploid
2889	23	1	pos21	ssd1_gis2	1	1	6	74	1.6	1.6.1	GIS2/gis2- SSD1/ssd1- 3n.Chr12	gis2	diploid
2890	23	1	pos22	ssd1	1	2	6	70	1.6	1.6.2	GIS2/gis2- SSD1/ssd1- 3n.Chr12	gis2	diploid
2891	23	1	pos23	gis2	0	3	6	364	1.6	1.6.3	GIS2/gis2- SSD1/ssd1- 3n.Chr12	gis2	diploid
2892	23	1	pos24	WT	0	4	6	380	1.6	1.6.4	GIS2/gis2- SSD1/ssd1- 3n.Chr12	gis2	diploid
2894	23	1	pos26	ssd1	1	2	7	111	1.7	1.7.2	GIS2/gis2- SSD1/ssd1- 3n.Chr12	gis2	diploid
2895	23	1	pos27	ssd1_gis2	0	3	7	316	1.7	1.7.3	GIS2/gis2- SSD1/ssd1- 3n.Chr12	gis2	diploid
2897	23	1	pos29	ssd1_gis2	0	1	8	348	1.8	1.8.1	GIS2/gis2- SSD1/ssd1- 3n.Chr12	gis2	diploid
2899	23	1	pos31	ssd1	1	3	8	68	1.8	1.8.3	GIS2/gis2- SSD1/ssd1- 3n.Chr12	gis2	diploid
2901	23	2	pos1	WT	1	1	1	253	2.1	2.1.1	GIS2/gis2- SSD1/ssd1- 3n.Chr12	gis2	diploid
2902	23	2	pos2	ssd1	0	2	1	352	2.1	2.1.2	GIS2/gis2- SSD1/ssd1- 3n.Chr12	gis2	diploid
2903	23	2	pos3	gis2	1	3	1	297	2.1	2.1.3	GIS2/gis2- SSD1/ssd1- 3n.Chr12	gis2	diploid
2904	23	2	pos4	ssd1_gis2	0	4	1	373	2.1	2.1.4	GIS2/gis2- SSD1/ssd1- 3n.Chr12	gis2	diploid
2906	23	2	pos6	ssd1_gis2	0	2	2	280	2.2	2.2.2	GIS2/gis2- SSD1/ssd1- 3n.Chr12	gis2	diploid
2908	23	2	pos8	ssd1_gis2	1	4	2	70	2.2	2.2.4	GIS2/gis2- SSD1/ssd1- 3n.Chr12	gis2	diploid
2909	23	2	pos9	ssd1_gis2	1	1	3	66	2.3	2.3.1	GIS2/gis2- SSD1/ssd1- 3n.Chr12	gis2	diploid
2910	23	2	pos10	ssd1	1	2	3	79	2.3	2.3.2	GIS2/gis2- SSD1/ssd1- 3n.Chr12	gis2	diploid
2911	23	2	pos11	WT	0	3	3	347	2.3	2.3.3	GIS2/gis2- SSD1/ssd1- 3n.Chr12	gis2	diploid
2912	23	2	pos12	gis2	0	4	3	347	2.3	2.3.4	GIS2/gis2- SSD1/ssd1- 3n.Chr12	gis2	diploid
2915	23	2	pos15	ssd1	0	3	4	381	2.4	2.4.3	GIS2/gis2- SSD1/ssd1- 3n.Chr12	gis2	diploid
2916	23	2	pos16	ssd1_gis2	1	4	4	75	2.4	2.4.4	GIS2/gis2- SSD1/ssd1- 3n.Chr12	gis2	diploid
2918	23	2	pos18	ssd1_gis2	1	2	5	67	2.5	2.5.2	GIS2/gis2- SSD1/ssd1- 3n.Chr12	gis2	diploid
2920	23	2	pos20	ssd1_gis2	0	4	5	368	2.5	2.5.4	GIS2/gis2- SSD1/ssd1- 3n.Chr12	gis2	diploid
2921	23	2	pos25	ssd1	1	1	7	83	2.7	2.7.1	GIS2/gis2- SSD1/ssd1- 3n.Chr12	gis2	diploid
2924	23	2	pos28	ssd1	0	4	7	379	2.7	2.7.4	GIS2/gis2- SSD1/ssd1- 3n.Chr12	gis2	diploid
2925	23	2	pos29	ssd1_gis2	1	1	8	68	2.8	2.8.1	GIS2/gis2- SSD1/ssd1- 3n.Chr12	gis2	diploid
2927	23	2	pos31	ssd1	0	3	8	393	2.8	2.8.3	GIS2/gis2- SSD1/ssd1- 3n.Chr12	gis2	diploid
2929	23	3	pos5	ssd1_gis2	0	1	2	273	3.2	3.2.1	GIS2/gis2- SSD1/ssd1- 3n.Chr12	gis2	diploid
2931	23	3	pos7	ssd1	1	3	2	40	3.2	3.2.3	GIS2/gis2- SSD1/ssd1- 3n.Chr12	gis2	diploid
2933	23	3	pos9	ssd1	1	1	3	55	3.3	3.3.1	GIS2/gis2- SSD1/ssd1- 3n.Chr12	gis2	diploid
2934	23	3	pos10	WT	0	2	3	323	3.3	3.3.2	GIS2/gis2- SSD1/ssd1- 3n.Chr12	gis2	diploid
2935	23	3	pos11	ssd1_gis2	1	3	3	76	3.3	3.3.3	GIS2/gis2- SSD1/ssd1- 3n.Chr12	gis2	diploid
2936	23	3	pos12	gis2	0	4	3	321	3.3	3.3.4	GIS2/gis2- SSD1/ssd1- 3n.Chr12	gis2	diploid
2938	23	3	pos14	ssd1_gis2	1	2	4	67	3.4	3.4.2	GIS2/gis2- SSD1/ssd1- 3n.Chr12	gis2	diploid
2940	23	3	pos16	ssd1	0	4	4	403	3.4	3.4.4	GIS2/gis2- SSD1/ssd1- 3n.Chr12	gis2	diploid
2941	23	3	pos17	ssd1_gis2	1	1	5	71	3.5	3.5.1	GIS2/gis2- SSD1/ssd1- 3n.Chr12	gis2	diploid
2944	23	3	pos20	ssd1	0	4	5	350	3.5	3.5.4	GIS2/gis2- SSD1/ssd1- 3n.Chr12	gis2	diploid
2946	23	3	pos22	ssd1	1	2	6	58	3.6	3.6.2	GIS2/gis2- SSD1/ssd1- 3n.Chr12	gis2	diploid
2947	23	3	pos23	ssd1	0	3	6	352	3.6	3.6.3	GIS2/gis2- SSD1/ssd1- 3n.Chr12	gis2	diploid
2950	23	3	pos26	ssd1_gis2	0	2	7	326	3.7	3.7.2	GIS2/gis2- SSD1/ssd1- 3n.Chr12	gis2	diploid
2952	23	3	pos28	ssd1	1	4	7	91	3.7	3.7.4	GIS2/gis2- SSD1/ssd1- 3n.Chr12	gis2	diploid
2953	23	3	pos29	ssd1	0	1	8	388	3.8	3.8.1	GIS2/gis2- SSD1/ssd1- 3n.Chr12	gis2	diploid
2954	23	3	pos30	ssd1	1	2	8	60	3.8	3.8.2	GIS2/gis2- SSD1/ssd1- 3n.Chr12	gis2	diploid
2959	23	4	pos3	ssd1_gis2	1	3	1	72	4.1	4.1.3	GIS2/gis2- SSD1/ssd1- 3n.Chr12	gis2	diploid
2960	23	4	pos4	ssd1	0	4	1	397	4.1	4.1.4	GIS2/gis2- SSD1/ssd1- 3n.Chr12	gis2	diploid
2962	23	4	pos6	ssd1_gis2	0	2	2	311	4.2	4.2.2	GIS2/gis2- SSD1/ssd1- 3n.Chr12	gis2	diploid
2963	23	4	pos7	ssd1_gis2	1	3	2	66	4.2	4.2.3	GIS2/gis2- SSD1/ssd1- 3n.Chr12	gis2	diploid
2965	23	4	pos9	WT	1	1	3	297	4.3	4.3.1	GIS2/gis2- SSD1/ssd1- 3n.Chr12	gis2	diploid
2966	23	4	pos10	WT	1	2	3	293	4.3	4.3.2	GIS2/gis2- SSD1/ssd1- 3n.Chr12	gis2	diploid
2967	23	4	pos11	ssd1_gis2	0	3	3	407	4.3	4.3.3	GIS2/gis2- SSD1/ssd1- 3n.Chr12	gis2	diploid
2968	23	4	pos12	ssd1_gis2	0	4	3	402	4.3	4.3.4	GIS2/gis2- SSD1/ssd1- 3n.Chr12	gis2	diploid
2969	23	4	pos13	ssd1	0	1	4	408	4.4	4.4.1	GIS2/gis2- SSD1/ssd1- 3n.Chr12	gis2	diploid
2972	23	4	pos16	ssd1_gis2	1	4	4	95	4.4	4.4.4	GIS2/gis2- SSD1/ssd1- 3n.Chr12	gis2	diploid
2973	23	4	pos17	ssd1_gis2	0	1	5	361	4.5	4.5.1	GIS2/gis2- SSD1/ssd1- 3n.Chr12	gis2	diploid
2974	23	4	pos18	ssd1_gis2	1	2	5	78	4.5	4.5.2	GIS2/gis2- SSD1/ssd1- 3n.Chr12	gis2	diploid
2977	23	4	pos21	WT	0	1	6	403	4.6	4.6.1	GIS2/gis2- SSD1/ssd1- 3n.Chr12	gis2	diploid
2978	23	4	pos22	ssd1	1	2	6	86	4.6	4.6.2	GIS2/gis2- SSD1/ssd1- 3n.Chr12	gis2	diploid
2979	23	4	pos23	gis2	0	3	6	351	4.6	4.6.3	GIS2/gis2- SSD1/ssd1- 3n.Chr12	gis2	diploid
2980	23	4	pos24	ssd1_gis2	1	4	6	82	4.6	4.6.4	GIS2/gis2- SSD1/ssd1- 3n.Chr12	gis2	diploid
2981	23	4	pos29	ssd1	0	1	8	352	4.8	4.8.1	GIS2/gis2- SSD1/ssd1- 3n.Chr12	gis2	diploid
2984	23	4	pos32	ssd1_gis2	1	4	8	74	4.8	4.8.4	GIS2/gis2- SSD1/ssd1- 3n.Chr12	gis2	diploid
2986	23	5	pos2	ssd1_gis2	0	2	1	280	5.1	5.1.2	GIS2/gis2- SSD1/ssd1- 3n.Chr12	gis2	diploid
2987	23	5	pos3	ssd1	1	3	1	51	5.1	5.1.3	GIS2/gis2- SSD1/ssd1- 3n.Chr12	gis2	diploid
2989	23	5	pos9	ssd1_gis2	0	1	3	342	5.3	5.3.1	GIS2/gis2- SSD1/ssd1- 3n.Chr12	gis2	diploid
2990	23	5	pos10	ssd1	1	2	3	60	5.3	5.3.2	GIS2/gis2- SSD1/ssd1- 3n.Chr12	gis2	diploid
2995	23	5	pos15	ssd1_gis2	0	3	4	365	5.4	5.4.3	GIS2/gis2- SSD1/ssd1- 3n.Chr12	gis2	diploid
2996	23	5	pos16	ssd1	1	4	4	82	5.4	5.4.4	GIS2/gis2- SSD1/ssd1- 3n.Chr12	gis2	diploid
2998	23	5	pos18	ssd1_gis2	1	2	5	55	5.5	5.5.2	GIS2/gis2- SSD1/ssd1- 3n.Chr12	gis2	diploid
3000	23	5	pos20	ssd1_gis2	0	4	5	394	5.5	5.5.4	GIS2/gis2- SSD1/ssd1- 3n.Chr12	gis2	diploid
3003	23	5	pos23	ssd1	0	3	6	277	5.6	5.6.3	GIS2/gis2- SSD1/ssd1- 3n.Chr12	gis2	diploid
3004	23	5	pos24	ssd1	1	4	6	145	5.6	5.6.4	GIS2/gis2- SSD1/ssd1- 3n.Chr12	gis2	diploid
3005	23	5	pos25	WT	0	1	7	371	5.7	5.7.1	GIS2/gis2- SSD1/ssd1- 3n.Chr12	gis2	diploid
3006	23	5	pos26	ssd1	1	2	7	61	5.7	5.7.2	GIS2/gis2- SSD1/ssd1- 3n.Chr12	gis2	diploid
3007	23	5	pos27	ssd1_gis2	1	3	7	65	5.7	5.7.3	GIS2/gis2- SSD1/ssd1- 3n.Chr12	gis2	diploid
3008	23	5	pos28	gis2	0	4	7	319	5.7	5.7.4	GIS2/gis2- SSD1/ssd1- 3n.Chr12	gis2	diploid
3011	23	5	pos31	ssd1	0	3	8	374	5.8	5.8.3	GIS2/gis2- SSD1/ssd1- 3n.Chr12	gis2	diploid
3012	23	5	pos32	ssd1	1	4	8	79	5.8	5.8.4	GIS2/gis2- SSD1/ssd1- 3n.Chr12	gis2	diploid
3013	23	6	pos1	ssd1_gis2	0	1	1	303	6.1	6.1.1	GIS2/gis2- SSD1/ssd1- 3n.Chr12	gis2	diploid
3015	23	6	pos3	ssd1_gis2	1	3	1	81	6.1	6.1.3	GIS2/gis2- SSD1/ssd1- 3n.Chr12	gis2	diploid
3019	23	6	pos7	ssd1	1	3	2	71	6.2	6.2.3	GIS2/gis2- SSD1/ssd1- 3n.Chr12	gis2	diploid
3020	23	6	pos8	ssd1_gis2	0	4	2	379	6.2	6.2.4	GIS2/gis2- SSD1/ssd1- 3n.Chr12	gis2	diploid
3021	23	6	pos9	ssd1	0	1	3	363	6.3	6.3.1	GIS2/gis2- SSD1/ssd1- 3n.Chr12	gis2	diploid
3024	23	6	pos12	ssd1_gis2	1	4	3	94	6.3	6.3.4	GIS2/gis2- SSD1/ssd1- 3n.Chr12	gis2	diploid
3025	23	6	pos13	ssd1_gis2	1	1	4	71	6.4	6.4.1	GIS2/gis2- SSD1/ssd1- 3n.Chr12	gis2	diploid
3026	23	6	pos14	ssd1	0	2	4	371	6.4	6.4.2	GIS2/gis2- SSD1/ssd1- 3n.Chr12	gis2	diploid
3032	23	6	pos20	ssd1_gis2	1	4	5	75	6.5	6.5.4	GIS2/gis2- SSD1/ssd1- 3n.Chr12	gis2	diploid
3034	23	6	pos22	ssd1_gis2	1	2	6	59	6.6	6.6.2	GIS2/gis2- SSD1/ssd1- 3n.Chr12	gis2	diploid
3035	23	6	pos23	ssd1	0	3	6	376	6.6	6.6.3	GIS2/gis2- SSD1/ssd1- 3n.Chr12	gis2	diploid
3038	23	6	pos26	ssd1	1	2	7	77	6.7	6.7.2	GIS2/gis2- SSD1/ssd1- 3n.Chr12	gis2	diploid
3039	23	6	pos27	ssd1_gis2	0	3	7	369	6.7	6.7.3	GIS2/gis2- SSD1/ssd1- 3n.Chr12	gis2	diploid
3042	23	6	pos30	ssd1	1	2	8	56	6.8	6.8.2	GIS2/gis2- SSD1/ssd1- 3n.Chr12	gis2	diploid
3044	23	6	pos32	ssd1	0	4	8	388	6.8	6.8.4	GIS2/gis2- SSD1/ssd1- 3n.Chr12	gis2	diploid
3045	24	1	pos1	ssd1	1	1	1	90	1.1	1.1.1	MRN1/mrn1- SSD1/ssd1- 3n.Chr12	mrn1	diploid
3046	24	1	pos2	ssd1_mrn1	1	2	1	73	1.1	1.1.2	MRN1/mrn1- SSD1/ssd1- 3n.Chr12	mrn1	diploid
3047	24	1	pos3	mrn1	0	3	1	341	1.1	1.1.3	MRN1/mrn1- SSD1/ssd1- 3n.Chr12	mrn1	diploid
3048	24	1	pos4	WT	0	4	1	332	1.1	1.1.4	MRN1/mrn1- SSD1/ssd1- 3n.Chr12	mrn1	diploid
3049	24	1	pos5	mrn1	0	1	2	319	1.2	1.2.1	MRN1/mrn1- SSD1/ssd1- 3n.Chr12	mrn1	diploid
3050	24	1	pos6	ssd1	1	2	2	66	1.2	1.2.2	MRN1/mrn1- SSD1/ssd1- 3n.Chr12	mrn1	diploid
3051	24	1	pos7	ssd1_mrn1	1	3	2	72	1.2	1.2.3	MRN1/mrn1- SSD1/ssd1- 3n.Chr12	mrn1	diploid
3052	24	1	pos8	WT	0	4	2	336	1.2	1.2.4	MRN1/mrn1- SSD1/ssd1- 3n.Chr12	mrn1	diploid
3054	24	1	pos10	ssd1	0	2	3	284	1.3	1.3.2	MRN1/mrn1- SSD1/ssd1- 3n.Chr12	mrn1	diploid
3056	24	1	pos12	ssd1	1	4	3	67	1.3	1.3.4	MRN1/mrn1- SSD1/ssd1- 3n.Chr12	mrn1	diploid
3057	24	1	pos13	ssd1_mrn1	0	1	4	350	1.4	1.4.1	MRN1/mrn1- SSD1/ssd1- 3n.Chr12	mrn1	diploid
3060	24	1	pos16	ssd1	1	4	4	59	1.4	1.4.4	MRN1/mrn1- SSD1/ssd1- 3n.Chr12	mrn1	diploid
3061	24	1	pos17	ssd1	1	1	5	48	1.5	1.5.1	MRN1/mrn1- SSD1/ssd1- 3n.Chr12	mrn1	diploid
3062	24	1	pos18	ssd1_mrn1	0	2	5	305	1.5	1.5.2	MRN1/mrn1- SSD1/ssd1- 3n.Chr12	mrn1	diploid
3065	24	1	pos25	ssd1	1	1	7	59	1.7	1.7.1	MRN1/mrn1- SSD1/ssd1- 3n.Chr12	mrn1	diploid
3067	24	1	pos27	ssd1	0	3	7	333	1.7	1.7.3	MRN1/mrn1- SSD1/ssd1- 3n.Chr12	mrn1	diploid
3069	24	1	pos29	ssd1	0	1	8	376	1.8	1.8.1	MRN1/mrn1- SSD1/ssd1- 3n.Chr12	mrn1	diploid
3070	24	1	pos30	ssd1	1	2	8	97	1.8	1.8.2	MRN1/mrn1- SSD1/ssd1- 3n.Chr12	mrn1	diploid
3074	24	2	pos2	ssd1_mrn1	0	2	1	284	2.1	2.1.2	MRN1/mrn1- SSD1/ssd1- 3n.Chr12	mrn1	diploid
3076	24	2	pos4	ssd1	1	4	1	76	2.1	2.1.4	MRN1/mrn1- SSD1/ssd1- 3n.Chr12	mrn1	diploid
3077	24	2	pos5	ssd1	1	1	2	43	2.2	2.2.1	MRN1/mrn1- SSD1/ssd1- 3n.Chr12	mrn1	diploid
3078	24	2	pos6	WT	0	2	2	270	2.2	2.2.2	MRN1/mrn1- SSD1/ssd1- 3n.Chr12	mrn1	diploid
3079	24	2	pos7	mrn1	0	3	2	218	2.2	2.2.3	MRN1/mrn1- SSD1/ssd1- 3n.Chr12	mrn1	diploid
3080	24	2	pos8	ssd1_mrn1	1	4	2	59	2.2	2.2.4	MRN1/mrn1- SSD1/ssd1- 3n.Chr12	mrn1	diploid
3082	24	2	pos10	ssd1	0	2	3	311	2.3	2.3.2	MRN1/mrn1- SSD1/ssd1- 3n.Chr12	mrn1	diploid
3083	24	2	pos11	ssd1_mrn1	1	3	3	52	2.3	2.3.3	MRN1/mrn1- SSD1/ssd1- 3n.Chr12	mrn1	diploid
3085	24	2	pos13	ssd1_mrn1	1	1	4	65	2.4	2.4.1	MRN1/mrn1- SSD1/ssd1- 3n.Chr12	mrn1	diploid
3086	24	2	pos14	ssd1	0	2	4	319	2.4	2.4.2	MRN1/mrn1- SSD1/ssd1- 3n.Chr12	mrn1	diploid
3089	24	2	pos17	WT	0	1	5	273	2.5	2.5.1	MRN1/mrn1- SSD1/ssd1- 3n.Chr12	mrn1	diploid
3090	24	2	pos18	mrn1	0	2	5	310	2.5	2.5.2	MRN1/mrn1- SSD1/ssd1- 3n.Chr12	mrn1	diploid
3091	24	2	pos19	ssd1	1	3	5	93	2.5	2.5.3	MRN1/mrn1- SSD1/ssd1- 3n.Chr12	mrn1	diploid
3092	24	2	pos20	ssd1_mrn1	1	4	5	58	2.5	2.5.4	MRN1/mrn1- SSD1/ssd1- 3n.Chr12	mrn1	diploid
3093	24	2	pos21	ssd1	1	1	6	52	2.6	2.6.1	MRN1/mrn1- SSD1/ssd1- 3n.Chr12	mrn1	diploid
3094	24	2	pos22	ssd1_mrn1	0	2	6	331	2.6	2.6.2	MRN1/mrn1- SSD1/ssd1- 3n.Chr12	mrn1	diploid
3098	24	2	pos26	ssd1_mrn1	0	2	7	330	2.7	2.7.2	MRN1/mrn1- SSD1/ssd1- 3n.Chr12	mrn1	diploid
3100	24	2	pos28	ssd1	1	4	7	52	2.7	2.7.4	MRN1/mrn1- SSD1/ssd1- 3n.Chr12	mrn1	diploid
3101	24	2	pos29	ssd1_mrn1	0	1	8	317	2.8	2.8.1	MRN1/mrn1- SSD1/ssd1- 3n.Chr12	mrn1	diploid
3102	24	2	pos30	ssd1	1	2	8	77	2.8	2.8.2	MRN1/mrn1- SSD1/ssd1- 3n.Chr12	mrn1	diploid
3106	24	3	pos2	ssd1	0	2	1	299	3.1	3.1.2	MRN1/mrn1- SSD1/ssd1- 3n.Chr12	mrn1	diploid
3108	24	3	pos4	ssd1	1	4	1	90	3.1	3.1.4	MRN1/mrn1- SSD1/ssd1- 3n.Chr12	mrn1	diploid
3109	24	3	pos5	WT	0	1	2	248	3.2	3.2.1	MRN1/mrn1- SSD1/ssd1- 3n.Chr12	mrn1	diploid
3110	24	3	pos6	ssd1	1	2	2	52	3.2	3.2.2	MRN1/mrn1- SSD1/ssd1- 3n.Chr12	mrn1	diploid
3111	24	3	pos7	mrn1	0	3	2	277	3.2	3.2.3	MRN1/mrn1- SSD1/ssd1- 3n.Chr12	mrn1	diploid
3112	24	3	pos8	ssd1_mrn1	1	4	2	84	3.2	3.2.4	MRN1/mrn1- SSD1/ssd1- 3n.Chr12	mrn1	diploid
3113	24	3	pos9	ssd1_mrn1	1	1	3	63	3.3	3.3.1	MRN1/mrn1- SSD1/ssd1- 3n.Chr12	mrn1	diploid
3114	24	3	pos10	ssd1_mrn1	1	2	3	65	3.3	3.3.2	MRN1/mrn1- SSD1/ssd1- 3n.Chr12	mrn1	diploid
3115	24	3	pos11	WT	0	3	3	281	3.3	3.3.3	MRN1/mrn1- SSD1/ssd1- 3n.Chr12	mrn1	diploid
3116	24	3	pos12	WT	0	4	3	246	3.3	3.3.4	MRN1/mrn1- SSD1/ssd1- 3n.Chr12	mrn1	diploid
3117	24	3	pos13	WT	1	1	4	258	3.4	3.4.1	MRN1/mrn1- SSD1/ssd1- 3n.Chr12	mrn1	diploid
3118	24	3	pos14	ssd1_mrn1	0	2	4	325	3.4	3.4.2	MRN1/mrn1- SSD1/ssd1- 3n.Chr12	mrn1	diploid
3119	24	3	pos15	ssd1_mrn1	0	3	4	322	3.4	3.4.3	MRN1/mrn1- SSD1/ssd1- 3n.Chr12	mrn1	diploid
3120	24	3	pos16	WT	1	4	4	254	3.4	3.4.4	MRN1/mrn1- SSD1/ssd1- 3n.Chr12	mrn1	diploid
3122	24	3	pos18	ssd1	1	2	5	56	3.5	3.5.2	MRN1/mrn1- SSD1/ssd1- 3n.Chr12	mrn1	diploid
3123	24	3	pos19	ssd1_mrn1	0	3	5	305	3.5	3.5.3	MRN1/mrn1- SSD1/ssd1- 3n.Chr12	mrn1	diploid
3127	24	3	pos23	ssd1_mrn1	0	3	6	327	3.6	3.6.3	MRN1/mrn1- SSD1/ssd1- 3n.Chr12	mrn1	diploid
3130	24	3	pos26	ssd1	1	2	7	80	3.7	3.7.2	MRN1/mrn1- SSD1/ssd1- 3n.Chr12	mrn1	diploid
3132	24	3	pos28	ssd1	0	4	7	327	3.7	3.7.4	MRN1/mrn1- SSD1/ssd1- 3n.Chr12	mrn1	diploid
3133	24	3	pos29	mrn1	1	1	8	270	3.8	3.8.1	MRN1/mrn1- SSD1/ssd1- 3n.Chr12	mrn1	diploid
3134	24	3	pos30	WT	1	2	8	283	3.8	3.8.2	MRN1/mrn1- SSD1/ssd1- 3n.Chr12	mrn1	diploid
3135	24	3	pos31	ssd1_mrn1	0	3	8	312	3.8	3.8.3	MRN1/mrn1- SSD1/ssd1- 3n.Chr12	mrn1	diploid
3136	24	3	pos32	ssd1	0	4	8	325	3.8	3.8.4	MRN1/mrn1- SSD1/ssd1- 3n.Chr12	mrn1	diploid
3138	24	4	pos2	ssd1_mrn1	1	2	1	60	4.1	4.1.2	MRN1/mrn1- SSD1/ssd1- 3n.Chr12	mrn1	diploid
3139	24	4	pos3	ssd1_mrn1	0	3	1	298	4.1	4.1.3	MRN1/mrn1- SSD1/ssd1- 3n.Chr12	mrn1	diploid
3143	24	4	pos7	ssd1	0	3	2	328	4.2	4.2.3	MRN1/mrn1- SSD1/ssd1- 3n.Chr12	mrn1	diploid
3144	24	4	pos8	ssd1_mrn1	1	4	2	67	4.2	4.2.4	MRN1/mrn1- SSD1/ssd1- 3n.Chr12	mrn1	diploid
3145	24	4	pos9	ssd1_mrn1	0	1	3	346	4.3	4.3.1	MRN1/mrn1- SSD1/ssd1- 3n.Chr12	mrn1	diploid
3146	24	4	pos10	ssd1_mrn1	1	2	3	58	4.3	4.3.2	MRN1/mrn1- SSD1/ssd1- 3n.Chr12	mrn1	diploid
3149	24	4	pos13	ssd1_mrn1	0	1	4	354	4.4	4.4.1	MRN1/mrn1- SSD1/ssd1- 3n.Chr12	mrn1	diploid
3150	24	4	pos14	ssd1	0	2	4	347	4.4	4.4.2	MRN1/mrn1- SSD1/ssd1- 3n.Chr12	mrn1	diploid
3151	24	4	pos15	WT	1	3	4	250	4.4	4.4.3	MRN1/mrn1- SSD1/ssd1- 3n.Chr12	mrn1	diploid
3152	24	4	pos16	mrn1	1	4	4	274	4.4	4.4.4	MRN1/mrn1- SSD1/ssd1- 3n.Chr12	mrn1	diploid
3153	24	4	pos17	ssd1	1	1	5	63	4.5	4.5.1	MRN1/mrn1- SSD1/ssd1- 3n.Chr12	mrn1	diploid
3156	24	4	pos20	ssd1_mrn1	0	4	5	369	4.5	4.5.4	MRN1/mrn1- SSD1/ssd1- 3n.Chr12	mrn1	diploid
3158	24	4	pos22	ssd1_mrn1	1	2	6	61	4.6	4.6.2	MRN1/mrn1- SSD1/ssd1- 3n.Chr12	mrn1	diploid
3159	24	4	pos23	ssd1_mrn1	0	3	6	332	4.6	4.6.3	MRN1/mrn1- SSD1/ssd1- 3n.Chr12	mrn1	diploid
3161	24	4	pos25	ssd1	1	1	7	93	4.7	4.7.1	MRN1/mrn1- SSD1/ssd1- 3n.Chr12	mrn1	diploid
3162	24	4	pos26	WT	0	2	7	320	4.7	4.7.2	MRN1/mrn1- SSD1/ssd1- 3n.Chr12	mrn1	diploid
3163	24	4	pos27	ssd1_mrn1	1	3	7	56	4.7	4.7.3	MRN1/mrn1- SSD1/ssd1- 3n.Chr12	mrn1	diploid
3164	24	4	pos28	mrn1	0	4	7	326	4.7	4.7.4	MRN1/mrn1- SSD1/ssd1- 3n.Chr12	mrn1	diploid
3165	24	4	pos29	ssd1_mrn1	1	1	8	66	4.8	4.8.1	MRN1/mrn1- SSD1/ssd1- 3n.Chr12	mrn1	diploid
3166	24	4	pos30	ssd1	0	2	8	295	4.8	4.8.2	MRN1/mrn1- SSD1/ssd1- 3n.Chr12	mrn1	diploid
3169	24	5	pos1	ssd1	0	1	1	309	5.1	5.1.1	MRN1/mrn1- SSD1/ssd1- 3n.Chr12	mrn1	diploid
3171	24	5	pos3	ssd1_mrn1	1	3	1	68	5.1	5.1.3	MRN1/mrn1- SSD1/ssd1- 3n.Chr12	mrn1	diploid
3173	24	5	pos5	ssd1_mrn1	1	1	2	64	5.2	5.2.1	MRN1/mrn1- SSD1/ssd1- 3n.Chr12	mrn1	diploid
3175	24	5	pos7	ssd1_mrn1	0	3	2	332	5.2	5.2.3	MRN1/mrn1- SSD1/ssd1- 3n.Chr12	mrn1	diploid
3179	24	5	pos11	ssd1	1	3	3	55	5.3	5.3.3	MRN1/mrn1- SSD1/ssd1- 3n.Chr12	mrn1	diploid
3180	24	5	pos12	ssd1	0	4	3	323	5.3	5.3.4	MRN1/mrn1- SSD1/ssd1- 3n.Chr12	mrn1	diploid
3181	24	5	pos13	ssd1_mrn1	1	1	4	64	5.4	5.4.1	MRN1/mrn1- SSD1/ssd1- 3n.Chr12	mrn1	diploid
3182	24	5	pos14	ssd1	1	2	4	48	5.4	5.4.2	MRN1/mrn1- SSD1/ssd1- 3n.Chr12	mrn1	diploid
3183	24	5	pos15	mrn1	0	3	4	310	5.4	5.4.3	MRN1/mrn1- SSD1/ssd1- 3n.Chr12	mrn1	diploid
3184	24	5	pos16	WT	0	4	4	292	5.4	5.4.4	MRN1/mrn1- SSD1/ssd1- 3n.Chr12	mrn1	diploid
3186	24	5	pos18	ssd1_mrn1	1	2	5	57	5.5	5.5.2	MRN1/mrn1- SSD1/ssd1- 3n.Chr12	mrn1	diploid
3188	24	5	pos20	ssd1	0	4	5	293	5.5	5.5.4	MRN1/mrn1- SSD1/ssd1- 3n.Chr12	mrn1	diploid
3189	24	5	pos21	mrn1	1	1	6	282	5.6	5.6.1	MRN1/mrn1- SSD1/ssd1- 3n.Chr12	mrn1	diploid
3190	24	5	pos22	ssd1	0	2	6	355	5.6	5.6.2	MRN1/mrn1- SSD1/ssd1- 3n.Chr12	mrn1	diploid
3191	24	5	pos23	ssd1	0	3	6	347	5.6	5.6.3	MRN1/mrn1- SSD1/ssd1- 3n.Chr12	mrn1	diploid
3192	24	5	pos24	mrn1	1	4	6	261	5.6	5.6.4	MRN1/mrn1- SSD1/ssd1- 3n.Chr12	mrn1	diploid
3194	24	5	pos26	ssd1_mrn1	0	2	7	306	5.7	5.7.2	MRN1/mrn1- SSD1/ssd1- 3n.Chr12	mrn1	diploid
3196	24	5	pos28	ssd1_mrn1	1	4	7	78	5.7	5.7.4	MRN1/mrn1- SSD1/ssd1- 3n.Chr12	mrn1	diploid
3197	24	5	pos29	ssd1_mrn1	0	1	8	348	5.8	5.8.1	MRN1/mrn1- SSD1/ssd1- 3n.Chr12	mrn1	diploid
3200	24	5	pos32	ssd1_mrn1	1	4	8	73	5.8	5.8.4	MRN1/mrn1- SSD1/ssd1- 3n.Chr12	mrn1	diploid
3201	24	6	pos1	ssd1	1	1	1	59	6.1	6.1.1	MRN1/mrn1- SSD1/ssd1- 3n.Chr12	mrn1	diploid
3202	24	6	pos2	ssd1_mrn1	0	2	1	325	6.1	6.1.2	MRN1/mrn1- SSD1/ssd1- 3n.Chr12	mrn1	diploid
3206	24	6	pos6	ssd1_mrn1	0	2	2	295	6.2	6.2.2	MRN1/mrn1- SSD1/ssd1- 3n.Chr12	mrn1	diploid
3208	24	6	pos8	ssd1_mrn1	1	4	2	78	6.2	6.2.4	MRN1/mrn1- SSD1/ssd1- 3n.Chr12	mrn1	diploid
3209	24	6	pos13	ssd1	0	1	4	356	6.4	6.4.1	MRN1/mrn1- SSD1/ssd1- 3n.Chr12	mrn1	diploid
3212	24	6	pos16	ssd1	1	4	4	56	6.4	6.4.4	MRN1/mrn1- SSD1/ssd1- 3n.Chr12	mrn1	diploid
3213	24	6	pos17	mrn1	0	1	5	272	6.5	6.5.1	MRN1/mrn1- SSD1/ssd1- 3n.Chr12	mrn1	diploid
3214	24	6	pos18	ssd1_mrn1	1	2	5	75	6.5	6.5.2	MRN1/mrn1- SSD1/ssd1- 3n.Chr12	mrn1	diploid
3215	24	6	pos19	WT	0	3	5	177	6.5	6.5.3	MRN1/mrn1- SSD1/ssd1- 3n.Chr12	mrn1	diploid
3216	24	6	pos20	ssd1	1	4	5	49	6.5	6.5.4	MRN1/mrn1- SSD1/ssd1- 3n.Chr12	mrn1	diploid
3218	24	6	pos22	ssd1_mrn1	1	2	6	82	6.6	6.6.2	MRN1/mrn1- SSD1/ssd1- 3n.Chr12	mrn1	diploid
3219	24	6	pos23	ssd1	0	3	6	301	6.6	6.6.3	MRN1/mrn1- SSD1/ssd1- 3n.Chr12	mrn1	diploid
3221	24	6	pos25	ssd1_mrn1	1	1	7	83	6.7	6.7.1	MRN1/mrn1- SSD1/ssd1- 3n.Chr12	mrn1	diploid
3222	24	6	pos26	ssd1_mrn1	0	2	7	321	6.7	6.7.2	MRN1/mrn1- SSD1/ssd1- 3n.Chr12	mrn1	diploid
3225	24	6	pos29	ssd1	1	1	8	49	6.8	6.8.1	MRN1/mrn1- SSD1/ssd1- 3n.Chr12	mrn1	diploid
3226	24	6	pos30	mrn1	0	2	8	291	6.8	6.8.2	MRN1/mrn1- SSD1/ssd1- 3n.Chr12	mrn1	diploid
3227	24	6	pos31	ssd1	1	3	8	59	6.8	6.8.3	MRN1/mrn1- SSD1/ssd1- 3n.Chr12	mrn1	diploid
3228	24	6	pos32	mrn1	0	4	8	306	6.8	6.8.4	MRN1/mrn1- SSD1/ssd1- 3n.Chr12	mrn1	diploid
3541	40	1	pos1	ssd1	1	1	1	38	1.1	1.1.1	NAB6/nab6- SSD1/ssd1- 3n.Chr12	nab6	diploid
3542	40	1	pos2	nab6	1	2	1	270	1.1	1.1.2	NAB6/nab6- SSD1/ssd1- 3n.Chr12	nab6	diploid
3543	40	1	pos3	ssd1	0	3	1	293	1.1	1.1.3	NAB6/nab6- SSD1/ssd1- 3n.Chr12	nab6	diploid
3544	40	1	pos4	nab6	0	4	1	308	1.1	1.1.4	NAB6/nab6- SSD1/ssd1- 3n.Chr12	nab6	diploid
3549	40	1	pos9	nab6	0	1	3	226	1.3	1.3.1	NAB6/nab6- SSD1/ssd1- 3n.Chr12	nab6	diploid
3550	40	1	pos10	ssd1_nab6	1	2	3	89	1.3	1.3.2	NAB6/nab6- SSD1/ssd1- 3n.Chr12	nab6	diploid
3551	40	1	pos11	WT	1	3	3	223	1.3	1.3.3	NAB6/nab6- SSD1/ssd1- 3n.Chr12	nab6	diploid
3552	40	1	pos12	ssd1	0	4	3	304	1.3	1.3.4	NAB6/nab6- SSD1/ssd1- 3n.Chr12	nab6	diploid
3553	40	1	pos13	ssd1_nab6	0	1	4	284	1.4	1.4.1	NAB6/nab6- SSD1/ssd1- 3n.Chr12	nab6	diploid
3554	40	1	pos14	ssd1	0	2	4	288	1.4	1.4.2	NAB6/nab6- SSD1/ssd1- 3n.Chr12	nab6	diploid
3555	40	1	pos15	WT	1	3	4	229	1.4	1.4.3	NAB6/nab6- SSD1/ssd1- 3n.Chr12	nab6	diploid
3556	40	1	pos16	nab6	1	4	4	254	1.4	1.4.4	NAB6/nab6- SSD1/ssd1- 3n.Chr12	nab6	diploid
3557	40	1	pos17	WT	1	1	5	263	1.5	1.5.1	NAB6/nab6- SSD1/ssd1- 3n.Chr12	nab6	diploid
3558	40	1	pos18	ssd1_nab6	1	2	5	95	1.5	1.5.2	NAB6/nab6- SSD1/ssd1- 3n.Chr12	nab6	diploid
3559	40	1	pos19	WT	0	3	5	288	1.5	1.5.3	NAB6/nab6- SSD1/ssd1- 3n.Chr12	nab6	diploid
3560	40	1	pos20	ssd1_nab6	0	4	5	318	1.5	1.5.4	NAB6/nab6- SSD1/ssd1- 3n.Chr12	nab6	diploid
3561	40	1	pos21	WT	0	1	6	313	1.6	1.6.1	NAB6/nab6- SSD1/ssd1- 3n.Chr12	nab6	diploid
3562	40	1	pos22	ssd1_nab6	0	2	6	296	1.6	1.6.2	NAB6/nab6- SSD1/ssd1- 3n.Chr12	nab6	diploid
3563	40	1	pos23	WT	1	3	6	229	1.6	1.6.3	NAB6/nab6- SSD1/ssd1- 3n.Chr12	nab6	diploid
3564	40	1	pos24	ssd1_nab6	1	4	6	103	1.6	1.6.4	NAB6/nab6- SSD1/ssd1- 3n.Chr12	nab6	diploid
3569	40	1	pos29	ssd1	1	1	8	72	1.8	1.8.1	NAB6/nab6- SSD1/ssd1- 3n.Chr12	nab6	diploid
3570	40	1	pos30	ssd1	0	2	8	270	1.8	1.8.2	NAB6/nab6- SSD1/ssd1- 3n.Chr12	nab6	diploid
3571	40	1	pos31	nab6	1	3	8	235	1.8	1.8.3	NAB6/nab6- SSD1/ssd1- 3n.Chr12	nab6	diploid
3572	40	1	pos32	nab6	0	4	8	303	1.8	1.8.4	NAB6/nab6- SSD1/ssd1- 3n.Chr12	nab6	diploid
3573	40	2	pos1	ssd1	0	1	1	283	2.1	2.1.1	NAB6/nab6- SSD1/ssd1- 3n.Chr12	nab6	diploid
3574	40	2	pos2	WT	1	2	1	234	2.1	2.1.2	NAB6/nab6- SSD1/ssd1- 3n.Chr12	nab6	diploid
3575	40	2	pos3	ssd1_nab6	0	3	1	324	2.1	2.1.3	NAB6/nab6- SSD1/ssd1- 3n.Chr12	nab6	diploid
3576	40	2	pos4	nab6	1	4	1	248	2.1	2.1.4	NAB6/nab6- SSD1/ssd1- 3n.Chr12	nab6	diploid
3577	40	2	pos5	nab6	0	1	2	276	2.2	2.2.1	NAB6/nab6- SSD1/ssd1- 3n.Chr12	nab6	diploid
3578	40	2	pos6	ssd1_nab6	0	2	2	313	2.2	2.2.2	NAB6/nab6- SSD1/ssd1- 3n.Chr12	nab6	diploid
3579	40	2	pos7	WT	1	3	2	257	2.2	2.2.3	NAB6/nab6- SSD1/ssd1- 3n.Chr12	nab6	diploid
3580	40	2	pos8	ssd1	1	4	2	68	2.2	2.2.4	NAB6/nab6- SSD1/ssd1- 3n.Chr12	nab6	diploid
3581	40	2	pos9	ssd1_nab6	0	1	3	340	2.3	2.3.1	NAB6/nab6- SSD1/ssd1- 3n.Chr12	nab6	diploid
3582	40	2	pos10	nab6	1	2	3	217	2.3	2.3.2	NAB6/nab6- SSD1/ssd1- 3n.Chr12	nab6	diploid
3583	40	2	pos11	ssd1	1	3	3	42	2.3	2.3.3	NAB6/nab6- SSD1/ssd1- 3n.Chr12	nab6	diploid
3584	40	2	pos12	WT	0	4	3	295	2.3	2.3.4	NAB6/nab6- SSD1/ssd1- 3n.Chr12	nab6	diploid
3585	40	2	pos13	ssd1_nab6	1	1	4	100	2.4	2.4.1	NAB6/nab6- SSD1/ssd1- 3n.Chr12	nab6	diploid
3586	40	2	pos14	WT	1	2	4	252	2.4	2.4.2	NAB6/nab6- SSD1/ssd1- 3n.Chr12	nab6	diploid
3587	40	2	pos15	ssd1	0	3	4	277	2.4	2.4.3	NAB6/nab6- SSD1/ssd1- 3n.Chr12	nab6	diploid
3588	40	2	pos16	nab6	0	4	4	267	2.4	2.4.4	NAB6/nab6- SSD1/ssd1- 3n.Chr12	nab6	diploid
3589	40	2	pos17	ssd1	0	1	5	317	2.5	2.5.1	NAB6/nab6- SSD1/ssd1- 3n.Chr12	nab6	diploid
3590	40	2	pos18	ssd1_nab6	1	2	5	96	2.5	2.5.2	NAB6/nab6- SSD1/ssd1- 3n.Chr12	nab6	diploid
3591	40	2	pos19	WT	1	3	5	236	2.5	2.5.3	NAB6/nab6- SSD1/ssd1- 3n.Chr12	nab6	diploid
3592	40	2	pos20	nab6	0	4	5	295	2.5	2.5.4	NAB6/nab6- SSD1/ssd1- 3n.Chr12	nab6	diploid
3593	40	2	pos21	ssd1_nab6	0	1	6	318	2.6	2.6.1	NAB6/nab6- SSD1/ssd1- 3n.Chr12	nab6	diploid
3594	40	2	pos22	ssd1_nab6	1	2	6	97	2.6	2.6.2	NAB6/nab6- SSD1/ssd1- 3n.Chr12	nab6	diploid
3595	40	2	pos23	WT	0	3	6	289	2.6	2.6.3	NAB6/nab6- SSD1/ssd1- 3n.Chr12	nab6	diploid
3596	40	2	pos24	WT	1	4	6	262	2.6	2.6.4	NAB6/nab6- SSD1/ssd1- 3n.Chr12	nab6	diploid
3597	40	2	pos25	nab6	1	1	7	259	2.7	2.7.1	NAB6/nab6- SSD1/ssd1- 3n.Chr12	nab6	diploid
3598	40	2	pos26	WT	0	2	7	269	2.7	2.7.2	NAB6/nab6- SSD1/ssd1- 3n.Chr12	nab6	diploid
3599	40	2	pos27	ssd1	0	3	7	298	2.7	2.7.3	NAB6/nab6- SSD1/ssd1- 3n.Chr12	nab6	diploid
3600	40	2	pos28	ssd1_nab6	1	4	7	109	2.7	2.7.4	NAB6/nab6- SSD1/ssd1- 3n.Chr12	nab6	diploid
3601	40	2	pos29	nab6	1	1	8	253	2.8	2.8.1	NAB6/nab6- SSD1/ssd1- 3n.Chr12	nab6	diploid
3602	40	2	pos30	WT	0	2	8	292	2.8	2.8.2	NAB6/nab6- SSD1/ssd1- 3n.Chr12	nab6	diploid
3603	40	2	pos31	ssd1_nab6	1	3	8	116	2.8	2.8.3	NAB6/nab6- SSD1/ssd1- 3n.Chr12	nab6	diploid
3604	40	2	pos32	ssd1	0	4	8	323	2.8	2.8.4	NAB6/nab6- SSD1/ssd1- 3n.Chr12	nab6	diploid
3605	40	3	pos1	ssd1_nab6	0	1	1	319	3.1	3.1.1	NAB6/nab6- SSD1/ssd1- 3n.Chr12	nab6	diploid
3606	40	3	pos2	ssd1_nab6	0	2	1	335	3.1	3.1.2	NAB6/nab6- SSD1/ssd1- 3n.Chr12	nab6	diploid
3607	40	3	pos3	WT	1	3	1	262	3.1	3.1.3	NAB6/nab6- SSD1/ssd1- 3n.Chr12	nab6	diploid
3608	40	3	pos4	WT	1	4	1	265	3.1	3.1.4	NAB6/nab6- SSD1/ssd1- 3n.Chr12	nab6	diploid
3609	40	3	pos5	nab6	0	1	2	264	3.2	3.2.1	NAB6/nab6- SSD1/ssd1- 3n.Chr12	nab6	diploid
3610	40	3	pos6	ssd1_nab6	1	2	2	86	3.2	3.2.2	NAB6/nab6- SSD1/ssd1- 3n.Chr12	nab6	diploid
3611	40	3	pos7	ssd1	0	3	2	294	3.2	3.2.3	NAB6/nab6- SSD1/ssd1- 3n.Chr12	nab6	diploid
3612	40	3	pos8	WT	1	4	2	255	3.2	3.2.4	NAB6/nab6- SSD1/ssd1- 3n.Chr12	nab6	diploid
3613	40	3	pos9	ssd1_nab6	1	1	3	104	3.3	3.3.1	NAB6/nab6- SSD1/ssd1- 3n.Chr12	nab6	diploid
3614	40	3	pos10	ssd1	1	2	3	46	3.3	3.3.2	NAB6/nab6- SSD1/ssd1- 3n.Chr12	nab6	diploid
3615	40	3	pos11	WT	0	3	3	306	3.3	3.3.3	NAB6/nab6- SSD1/ssd1- 3n.Chr12	nab6	diploid
3616	40	3	pos12	nab6	0	4	3	297	3.3	3.3.4	NAB6/nab6- SSD1/ssd1- 3n.Chr12	nab6	diploid
3617	40	3	pos13	ssd1	1	1	4	87	3.4	3.4.1	NAB6/nab6- SSD1/ssd1- 3n.Chr12	nab6	diploid
3618	40	3	pos14	WT	0	2	4	272	3.4	3.4.2	NAB6/nab6- SSD1/ssd1- 3n.Chr12	nab6	diploid
3619	40	3	pos15	ssd1_nab6	1	3	4	99	3.4	3.4.3	NAB6/nab6- SSD1/ssd1- 3n.Chr12	nab6	diploid
3620	40	3	pos16	nab6	0	4	4	300	3.4	3.4.4	NAB6/nab6- SSD1/ssd1- 3n.Chr12	nab6	diploid
3621	40	3	pos17	ssd1	1	1	5	63	3.5	3.5.1	NAB6/nab6- SSD1/ssd1- 3n.Chr12	nab6	diploid
3622	40	3	pos18	ssd1_nab6	1	2	5	90	3.5	3.5.2	NAB6/nab6- SSD1/ssd1- 3n.Chr12	nab6	diploid
3623	40	3	pos19	WT	0	3	5	292	3.5	3.5.3	NAB6/nab6- SSD1/ssd1- 3n.Chr12	nab6	diploid
3624	40	3	pos20	nab6	0	4	5	265	3.5	3.5.4	NAB6/nab6- SSD1/ssd1- 3n.Chr12	nab6	diploid
3625	40	3	pos21	ssd1_nab6	1	1	6	111	3.6	3.6.1	NAB6/nab6- SSD1/ssd1- 3n.Chr12	nab6	diploid
3626	40	3	pos22	nab6	0	2	6	279	3.6	3.6.2	NAB6/nab6- SSD1/ssd1- 3n.Chr12	nab6	diploid
3627	40	3	pos23	WT	1	3	6	243	3.6	3.6.3	NAB6/nab6- SSD1/ssd1- 3n.Chr12	nab6	diploid
3628	40	3	pos24	ssd1	0	4	6	345	3.6	3.6.4	NAB6/nab6- SSD1/ssd1- 3n.Chr12	nab6	diploid
3629	40	3	pos25	nab6	0	1	7	284	3.7	3.7.1	NAB6/nab6- SSD1/ssd1- 3n.Chr12	nab6	diploid
3630	40	3	pos26	nab6	1	2	7	209	3.7	3.7.2	NAB6/nab6- SSD1/ssd1- 3n.Chr12	nab6	diploid
3631	40	3	pos27	ssd1	1	3	7	44	3.7	3.7.3	NAB6/nab6- SSD1/ssd1- 3n.Chr12	nab6	diploid
3632	40	3	pos28	ssd1	0	4	7	333	3.7	3.7.4	NAB6/nab6- SSD1/ssd1- 3n.Chr12	nab6	diploid
3633	40	3	pos29	WT	0	1	8	305	3.8	3.8.1	NAB6/nab6- SSD1/ssd1- 3n.Chr12	nab6	diploid
3634	40	3	pos30	ssd1_nab6	0	2	8	331	3.8	3.8.2	NAB6/nab6- SSD1/ssd1- 3n.Chr12	nab6	diploid
3635	40	3	pos31	ssd1	1	3	8	54	3.8	3.8.3	NAB6/nab6- SSD1/ssd1- 3n.Chr12	nab6	diploid
3636	40	3	pos32	nab6	1	4	8	285	3.8	3.8.4	NAB6/nab6- SSD1/ssd1- 3n.Chr12	nab6	diploid
3637	40	4	pos1	nab6	1	1	1	241	4.1	4.1.1	NAB6/nab6- SSD1/ssd1- 3n.Chr12	nab6	diploid
3638	40	4	pos2	ssd1_nab6	1	2	1	103	4.1	4.1.2	NAB6/nab6- SSD1/ssd1- 3n.Chr12	nab6	diploid
3639	40	4	pos3	ssd1	0	3	1	320	4.1	4.1.3	NAB6/nab6- SSD1/ssd1- 3n.Chr12	nab6	diploid
3640	40	4	pos4	WT	0	4	1	323	4.1	4.1.4	NAB6/nab6- SSD1/ssd1- 3n.Chr12	nab6	diploid
3641	40	4	pos5	nab6	0	1	2	268	4.2	4.2.1	NAB6/nab6- SSD1/ssd1- 3n.Chr12	nab6	diploid
3642	40	4	pos6	ssd1_nab6	1	2	2	108	4.2	4.2.2	NAB6/nab6- SSD1/ssd1- 3n.Chr12	nab6	diploid
3643	40	4	pos7	ssd1	1	3	2	54	4.2	4.2.3	NAB6/nab6- SSD1/ssd1- 3n.Chr12	nab6	diploid
3644	40	4	pos8	WT	0	4	2	334	4.2	4.2.4	NAB6/nab6- SSD1/ssd1- 3n.Chr12	nab6	diploid
3645	40	4	pos9	ssd1	1	1	3	47	4.3	4.3.1	NAB6/nab6- SSD1/ssd1- 3n.Chr12	nab6	diploid
3646	40	4	pos10	nab6	0	2	3	271	4.3	4.3.2	NAB6/nab6- SSD1/ssd1- 3n.Chr12	nab6	diploid
3647	40	4	pos11	nab6	1	3	3	234	4.3	4.3.3	NAB6/nab6- SSD1/ssd1- 3n.Chr12	nab6	diploid
3648	40	4	pos12	ssd1	0	4	3	346	4.3	4.3.4	NAB6/nab6- SSD1/ssd1- 3n.Chr12	nab6	diploid
3649	40	4	pos13	WT	1	1	4	245	4.4	4.4.1	NAB6/nab6- SSD1/ssd1- 3n.Chr12	nab6	diploid
3650	40	4	pos14	ssd1_nab6	0	2	4	262	4.4	4.4.2	NAB6/nab6- SSD1/ssd1- 3n.Chr12	nab6	diploid
3651	40	4	pos15	ssd1	0	3	4	285	4.4	4.4.3	NAB6/nab6- SSD1/ssd1- 3n.Chr12	nab6	diploid
3652	40	4	pos16	nab6	1	4	4	259	4.4	4.4.4	NAB6/nab6- SSD1/ssd1- 3n.Chr12	nab6	diploid
3653	40	4	pos17	WT	1	1	5	268	4.5	4.5.1	NAB6/nab6- SSD1/ssd1- 3n.Chr12	nab6	diploid
3654	40	4	pos18	ssd1_nab6	0	2	5	289	4.5	4.5.2	NAB6/nab6- SSD1/ssd1- 3n.Chr12	nab6	diploid
3655	40	4	pos19	ssd1_nab6	0	3	5	308	4.5	4.5.3	NAB6/nab6- SSD1/ssd1- 3n.Chr12	nab6	diploid
3656	40	4	pos20	WT	1	4	5	262	4.5	4.5.4	NAB6/nab6- SSD1/ssd1- 3n.Chr12	nab6	diploid
3657	40	4	pos21	WT	1	1	6	261	4.6	4.6.1	NAB6/nab6- SSD1/ssd1- 3n.Chr12	nab6	diploid
3658	40	4	pos22	nab6	0	2	6	222	4.6	4.6.2	NAB6/nab6- SSD1/ssd1- 3n.Chr12	nab6	diploid
3659	40	4	pos23	ssd1_nab6	0	3	6	257	4.6	4.6.3	NAB6/nab6- SSD1/ssd1- 3n.Chr12	nab6	diploid
3660	40	4	pos24	ssd1	1	4	6	40	4.6	4.6.4	NAB6/nab6- SSD1/ssd1- 3n.Chr12	nab6	diploid
3661	40	4	pos25	ssd1_nab6	1	1	7	119	4.7	4.7.1	NAB6/nab6- SSD1/ssd1- 3n.Chr12	nab6	diploid
3662	40	4	pos26	WT	0	2	7	273	4.7	4.7.2	NAB6/nab6- SSD1/ssd1- 3n.Chr12	nab6	diploid
3663	40	4	pos27	ssd1_nab6	0	3	7	291	4.7	4.7.3	NAB6/nab6- SSD1/ssd1- 3n.Chr12	nab6	diploid
3664	40	4	pos28	WT	1	4	7	263	4.7	4.7.4	NAB6/nab6- SSD1/ssd1- 3n.Chr12	nab6	diploid
3665	40	4	pos29	WT	1	1	8	275	4.8	4.8.1	NAB6/nab6- SSD1/ssd1- 3n.Chr12	nab6	diploid
3666	40	4	pos30	ssd1_nab6	1	2	8	103	4.8	4.8.2	NAB6/nab6- SSD1/ssd1- 3n.Chr12	nab6	diploid
3667	40	4	pos31	ssd1_nab6	0	3	8	299	4.8	4.8.3	NAB6/nab6- SSD1/ssd1- 3n.Chr12	nab6	diploid
3668	40	4	pos32	WT	0	4	8	306	4.8	4.8.4	NAB6/nab6- SSD1/ssd1- 3n.Chr12	nab6	diploid
3669	41	1	pos1	ssd1_mrn1	1	1	1	71	1.1	1.1.1	MRN1/mrn1- SSD1/ssd1- 3n.Chr12	mrn1	diploid
3670	41	1	pos2	WT	1	2	1	250	1.1	1.1.2	MRN1/mrn1- SSD1/ssd1- 3n.Chr12	mrn1	diploid
3671	41	1	pos3	mrn1	0	3	1	300	1.1	1.1.3	MRN1/mrn1- SSD1/ssd1- 3n.Chr12	mrn1	diploid
3672	41	1	pos4	ssd1	0	4	1	319	1.1	1.1.4	MRN1/mrn1- SSD1/ssd1- 3n.Chr12	mrn1	diploid
3681	41	1	pos13	WT	0	1	4	298	1.4	1.4.1	MRN1/mrn1- SSD1/ssd1- 3n.Chr12	mrn1	diploid
3682	41	1	pos14	ssd1_mrn1	1	2	4	64	1.4	1.4.2	MRN1/mrn1- SSD1/ssd1- 3n.Chr12	mrn1	diploid
3683	41	1	pos15	ssd1	1	3	4	58	1.4	1.4.3	MRN1/mrn1- SSD1/ssd1- 3n.Chr12	mrn1	diploid
3684	41	1	pos16	mrn1	0	4	4	309	1.4	1.4.4	MRN1/mrn1- SSD1/ssd1- 3n.Chr12	mrn1	diploid
3685	41	1	pos17	WT	0	1	5	317	1.5	1.5.1	MRN1/mrn1- SSD1/ssd1- 3n.Chr12	mrn1	diploid
3686	41	1	pos18	WT	1	2	5	268	1.5	1.5.2	MRN1/mrn1- SSD1/ssd1- 3n.Chr12	mrn1	diploid
3687	41	1	pos19	ssd1_mrn1	0	3	5	317	1.5	1.5.3	MRN1/mrn1- SSD1/ssd1- 3n.Chr12	mrn1	diploid
3688	41	1	pos20	ssd1_mrn1	1	4	5	71	1.5	1.5.4	MRN1/mrn1- SSD1/ssd1- 3n.Chr12	mrn1	diploid
3689	41	1	pos21	mrn1	0	1	6	313	1.6	1.6.1	MRN1/mrn1- SSD1/ssd1- 3n.Chr12	mrn1	diploid
3690	41	1	pos22	WT	0	2	6	277	1.6	1.6.2	MRN1/mrn1- SSD1/ssd1- 3n.Chr12	mrn1	diploid
3691	41	1	pos23	ssd1_mrn1	1	3	6	64	1.6	1.6.3	MRN1/mrn1- SSD1/ssd1- 3n.Chr12	mrn1	diploid
3692	41	1	pos24	ssd1	1	4	6	86	1.6	1.6.4	MRN1/mrn1- SSD1/ssd1- 3n.Chr12	mrn1	diploid
3701	41	2	pos1	mrn1	0	1	1	238	2.1	2.1.1	MRN1/mrn1- SSD1/ssd1- 3n.Chr12	mrn1	diploid
3702	41	2	pos2	ssd1	0	2	1	325	2.1	2.1.2	MRN1/mrn1- SSD1/ssd1- 3n.Chr12	mrn1	diploid
3703	41	2	pos3	WT	1	3	1	288	2.1	2.1.3	MRN1/mrn1- SSD1/ssd1- 3n.Chr12	mrn1	diploid
3704	41	2	pos4	ssd1_mrn1	1	4	1	61	2.1	2.1.4	MRN1/mrn1- SSD1/ssd1- 3n.Chr12	mrn1	diploid
3705	41	2	pos5	mrn1	0	1	2	267	2.2	2.2.1	MRN1/mrn1- SSD1/ssd1- 3n.Chr12	mrn1	diploid
3706	41	2	pos6	WT	1	2	2	245	2.2	2.2.2	MRN1/mrn1- SSD1/ssd1- 3n.Chr12	mrn1	diploid
3707	41	2	pos7	ssd1	0	3	2	330	2.2	2.2.3	MRN1/mrn1- SSD1/ssd1- 3n.Chr12	mrn1	diploid
3708	41	2	pos8	ssd1_mrn1	1	4	2	57	2.2	2.2.4	MRN1/mrn1- SSD1/ssd1- 3n.Chr12	mrn1	diploid
3713	41	2	pos13	WT	1	1	4	250	2.4	2.4.1	MRN1/mrn1- SSD1/ssd1- 3n.Chr12	mrn1	diploid
3714	41	2	pos14	ssd1_mrn1	1	2	4	56	2.4	2.4.2	MRN1/mrn1- SSD1/ssd1- 3n.Chr12	mrn1	diploid
3715	41	2	pos15	ssd1	0	3	4	324	2.4	2.4.3	MRN1/mrn1- SSD1/ssd1- 3n.Chr12	mrn1	diploid
3716	41	2	pos16	mrn1	0	4	4	292	2.4	2.4.4	MRN1/mrn1- SSD1/ssd1- 3n.Chr12	mrn1	diploid
3737	41	3	pos5	ssd1_mrn1	0	1	2	314	3.2	3.2.1	MRN1/mrn1- SSD1/ssd1- 3n.Chr12	mrn1	diploid
3738	41	3	pos6	ssd1_mrn1	1	2	2	62	3.2	3.2.2	MRN1/mrn1- SSD1/ssd1- 3n.Chr12	mrn1	diploid
3739	41	3	pos7	WT	1	3	2	237	3.2	3.2.3	MRN1/mrn1- SSD1/ssd1- 3n.Chr12	mrn1	diploid
3740	41	3	pos8	WT	0	4	2	304	3.2	3.2.4	MRN1/mrn1- SSD1/ssd1- 3n.Chr12	mrn1	diploid
3757	41	3	pos29	WT	0	1	8	297	3.8	3.8.1	MRN1/mrn1- SSD1/ssd1- 3n.Chr12	mrn1	diploid
3758	41	3	pos30	ssd1	1	2	8	44	3.8	3.8.2	MRN1/mrn1- SSD1/ssd1- 3n.Chr12	mrn1	diploid
3759	41	3	pos31	ssd1_mrn1	1	3	8	53	3.8	3.8.3	MRN1/mrn1- SSD1/ssd1- 3n.Chr12	mrn1	diploid
3760	41	3	pos32	mrn1	0	4	8	315	3.8	3.8.4	MRN1/mrn1- SSD1/ssd1- 3n.Chr12	mrn1	diploid
3761	41	4	pos1	ssd1	1	1	1	58	4.1	4.1.1	MRN1/mrn1- SSD1/ssd1- 3n.Chr12	mrn1	diploid
3762	41	4	pos2	mrn1	0	2	1	301	4.1	4.1.2	MRN1/mrn1- SSD1/ssd1- 3n.Chr12	mrn1	diploid
3763	41	4	pos3	WT	0	3	1	305	4.1	4.1.3	MRN1/mrn1- SSD1/ssd1- 3n.Chr12	mrn1	diploid
3764	41	4	pos4	ssd1_mrn1	1	4	1	66	4.1	4.1.4	MRN1/mrn1- SSD1/ssd1- 3n.Chr12	mrn1	diploid
3765	41	4	pos5	ssd1	0	1	2	309	4.2	4.2.1	MRN1/mrn1- SSD1/ssd1- 3n.Chr12	mrn1	diploid
3766	41	4	pos6	mrn1	1	2	2	296	4.2	4.2.2	MRN1/mrn1- SSD1/ssd1- 3n.Chr12	mrn1	diploid
3767	41	4	pos7	WT	0	3	2	310	4.2	4.2.3	MRN1/mrn1- SSD1/ssd1- 3n.Chr12	mrn1	diploid
3768	41	4	pos8	ssd1_mrn1	1	4	2	66	4.2	4.2.4	MRN1/mrn1- SSD1/ssd1- 3n.Chr12	mrn1	diploid
3777	41	4	pos21	mrn1	0	1	6	313	4.6	4.6.1	MRN1/mrn1- SSD1/ssd1- 3n.Chr12	mrn1	diploid
3778	41	4	pos22	ssd1	1	2	6	53	4.6	4.6.2	MRN1/mrn1- SSD1/ssd1- 3n.Chr12	mrn1	diploid
3779	41	4	pos23	mrn1	0	3	6	296	4.6	4.6.3	MRN1/mrn1- SSD1/ssd1- 3n.Chr12	mrn1	diploid
3780	41	4	pos24	ssd1	1	4	6	93	4.6	4.6.4	MRN1/mrn1- SSD1/ssd1- 3n.Chr12	mrn1	diploid
3781	41	4	pos25	mrn1	0	1	7	337	4.7	4.7.1	MRN1/mrn1- SSD1/ssd1- 3n.Chr12	mrn1	diploid
3782	41	4	pos26	ssd1	1	2	7	48	4.7	4.7.2	MRN1/mrn1- SSD1/ssd1- 3n.Chr12	mrn1	diploid
3783	41	4	pos27	mrn1	1	3	7	240	4.7	4.7.3	MRN1/mrn1- SSD1/ssd1- 3n.Chr12	mrn1	diploid
3784	41	4	pos28	ssd1	0	4	7	347	4.7	4.7.4	MRN1/mrn1- SSD1/ssd1- 3n.Chr12	mrn1	diploid
4545	4	1	pos1	WT	0	1	1	314	1.1	1.1.1	PUF6/puf6- SSD1/ssd1- 3n.Chr12	puf6	diploid
4546	4	1	pos2	ssd1_puf6	1	2	1	60	1.1	1.1.2	PUF6/puf6- SSD1/ssd1- 3n.Chr12	puf6	diploid
4547	4	1	pos3	puf6	0	3	1	257	1.1	1.1.3	PUF6/puf6- SSD1/ssd1- 3n.Chr12	puf6	diploid
4548	4	1	pos4	ssd1	1	4	1	104	1.1	1.1.4	PUF6/puf6- SSD1/ssd1- 3n.Chr12	puf6	diploid
4549	4	1	pos5	WT	0	1	2	320	1.2	1.2.1	PUF6/puf6- SSD1/ssd1- 3n.Chr12	puf6	diploid
4550	4	1	pos6	ssd1_puf6	0	2	2	278	1.2	1.2.2	PUF6/puf6- SSD1/ssd1- 3n.Chr12	puf6	diploid
4551	4	1	pos7	ssd1_puf6	1	3	2	48	1.2	1.2.3	PUF6/puf6- SSD1/ssd1- 3n.Chr12	puf6	diploid
4552	4	1	pos8	WT	1	4	2	300	1.2	1.2.4	PUF6/puf6- SSD1/ssd1- 3n.Chr12	puf6	diploid
4553	4	1	pos9	WT	1	1	3	313	1.3	1.3.1	PUF6/puf6- SSD1/ssd1- 3n.Chr12	puf6	diploid
4554	4	1	pos10	WT	0	2	3	402	1.3	1.3.2	PUF6/puf6- SSD1/ssd1- 3n.Chr12	puf6	diploid
4555	4	1	pos11	ssd1_puf6	1	3	3	36	1.3	1.3.3	PUF6/puf6- SSD1/ssd1- 3n.Chr12	puf6	diploid
4556	4	1	pos12	ssd1_puf6	0	4	3	292	1.3	1.3.4	PUF6/puf6- SSD1/ssd1- 3n.Chr12	puf6	diploid
4561	4	1	pos17	puf6	1	1	5	160	1.5	1.5.1	PUF6/puf6- SSD1/ssd1- 3n.Chr12	puf6	diploid
4562	4	1	pos18	ssd1	0	2	5	344	1.5	1.5.2	PUF6/puf6- SSD1/ssd1- 3n.Chr12	puf6	diploid
4563	4	1	pos19	puf6	0	3	5	265	1.5	1.5.3	PUF6/puf6- SSD1/ssd1- 3n.Chr12	puf6	diploid
4564	4	1	pos20	ssd1	1	4	5	112	1.5	1.5.4	PUF6/puf6- SSD1/ssd1- 3n.Chr12	puf6	diploid
4565	4	1	pos21	ssd1_puf6	0	1	6	266	1.6	1.6.1	PUF6/puf6- SSD1/ssd1- 3n.Chr12	puf6	diploid
4566	4	1	pos22	ssd1	1	2	6	101	1.6	1.6.2	PUF6/puf6- SSD1/ssd1- 3n.Chr12	puf6	diploid
4567	4	1	pos23	WT	1	3	6	301	1.6	1.6.3	PUF6/puf6- SSD1/ssd1- 3n.Chr12	puf6	diploid
4568	4	1	pos24	puf6	0	4	6	221	1.6	1.6.4	PUF6/puf6- SSD1/ssd1- 3n.Chr12	puf6	diploid
4569	4	1	pos25	ssd1	0	1	7	405	1.7	1.7.1	PUF6/puf6- SSD1/ssd1- 3n.Chr12	puf6	diploid
4570	4	1	pos26	ssd1_puf6	1	2	7	53	1.7	1.7.2	PUF6/puf6- SSD1/ssd1- 3n.Chr12	puf6	diploid
4571	4	1	pos27	WT	1	3	7	319	1.7	1.7.3	PUF6/puf6- SSD1/ssd1- 3n.Chr12	puf6	diploid
4572	4	1	pos28	puf6	0	4	7	261	1.7	1.7.4	PUF6/puf6- SSD1/ssd1- 3n.Chr12	puf6	diploid
4573	4	1	pos29	puf6	1	1	8	181	1.8	1.8.1	PUF6/puf6- SSD1/ssd1- 3n.Chr12	puf6	diploid
4574	4	1	pos30	ssd1	0	2	8	427	1.8	1.8.2	PUF6/puf6- SSD1/ssd1- 3n.Chr12	puf6	diploid
4575	4	1	pos31	ssd1_puf6	0	3	8	237	1.8	1.8.3	PUF6/puf6- SSD1/ssd1- 3n.Chr12	puf6	diploid
4576	4	1	pos32	WT	1	4	8	318	1.8	1.8.4	PUF6/puf6- SSD1/ssd1- 3n.Chr12	puf6	diploid
4577	4	2	pos1	WT	0	1	1	312	2.1	2.1.1	PUF6/puf6- SSD1/ssd1- 3n.Chr12	puf6	diploid
4578	4	2	pos2	ssd1_puf6	1	2	1	54	2.1	2.1.2	PUF6/puf6- SSD1/ssd1- 3n.Chr12	puf6	diploid
4579	4	2	pos3	ssd1	1	3	1	48	2.1	2.1.3	PUF6/puf6- SSD1/ssd1- 3n.Chr12	puf6	diploid
4580	4	2	pos4	puf6	0	4	1	248	2.1	2.1.4	PUF6/puf6- SSD1/ssd1- 3n.Chr12	puf6	diploid
4581	4	2	pos5	WT	0	1	2	279	2.2	2.2.1	PUF6/puf6- SSD1/ssd1- 3n.Chr12	puf6	diploid
4582	4	2	pos6	puf6	1	2	2	141	2.2	2.2.2	PUF6/puf6- SSD1/ssd1- 3n.Chr12	puf6	diploid
4583	4	2	pos7	ssd1_puf6	0	3	2	176	2.2	2.2.3	PUF6/puf6- SSD1/ssd1- 3n.Chr12	puf6	diploid
4584	4	2	pos8	ssd1	1	4	2	150	2.2	2.2.4	PUF6/puf6- SSD1/ssd1- 3n.Chr12	puf6	diploid
4585	4	2	pos9	WT	0	1	3	310	2.3	2.3.1	PUF6/puf6- SSD1/ssd1- 3n.Chr12	puf6	diploid
4586	4	2	pos10	ssd1_puf6	0	2	3	244	2.3	2.3.2	PUF6/puf6- SSD1/ssd1- 3n.Chr12	puf6	diploid
4587	4	2	pos11	ssd1	1	3	3	66	2.3	2.3.3	PUF6/puf6- SSD1/ssd1- 3n.Chr12	puf6	diploid
4588	4	2	pos12	puf6	1	4	3	171	2.3	2.3.4	PUF6/puf6- SSD1/ssd1- 3n.Chr12	puf6	diploid
4589	4	2	pos13	WT	0	1	4	347	2.4	2.4.1	PUF6/puf6- SSD1/ssd1- 3n.Chr12	puf6	diploid
4590	4	2	pos14	ssd1_puf6	1	2	4	29	2.4	2.4.2	PUF6/puf6- SSD1/ssd1- 3n.Chr12	puf6	diploid
4591	4	2	pos15	ssd1	0	3	4	358	2.4	2.4.3	PUF6/puf6- SSD1/ssd1- 3n.Chr12	puf6	diploid
4592	4	2	pos16	puf6	1	4	4	163	2.4	2.4.4	PUF6/puf6- SSD1/ssd1- 3n.Chr12	puf6	diploid
4593	4	2	pos17	puf6	1	1	5	163	2.5	2.5.1	PUF6/puf6- SSD1/ssd1- 3n.Chr12	puf6	diploid
4594	4	2	pos18	ssd1	1	2	5	94	2.5	2.5.2	PUF6/puf6- SSD1/ssd1- 3n.Chr12	puf6	diploid
4595	4	2	pos19	ssd1	0	3	5	355	2.5	2.5.3	PUF6/puf6- SSD1/ssd1- 3n.Chr12	puf6	diploid
4596	4	2	pos20	puf6	0	4	5	243	2.5	2.5.4	PUF6/puf6- SSD1/ssd1- 3n.Chr12	puf6	diploid
4597	4	2	pos21	ssd1_puf6	0	1	6	217	2.6	2.6.1	PUF6/puf6- SSD1/ssd1- 3n.Chr12	puf6	diploid
4598	4	2	pos22	WT	1	2	6	281	2.6	2.6.2	PUF6/puf6- SSD1/ssd1- 3n.Chr12	puf6	diploid
4599	4	2	pos23	puf6	1	3	6	151	2.6	2.6.3	PUF6/puf6- SSD1/ssd1- 3n.Chr12	puf6	diploid
4600	4	2	pos24	ssd1	0	4	6	397	2.6	2.6.4	PUF6/puf6- SSD1/ssd1- 3n.Chr12	puf6	diploid
4601	4	2	pos25	ssd1_puf6	0	1	7	212	2.7	2.7.1	PUF6/puf6- SSD1/ssd1- 3n.Chr12	puf6	diploid
4602	4	2	pos26	WT	0	2	7	330	2.7	2.7.2	PUF6/puf6- SSD1/ssd1- 3n.Chr12	puf6	diploid
4603	4	2	pos27	ssd1_puf6	1	3	7	43	2.7	2.7.3	PUF6/puf6- SSD1/ssd1- 3n.Chr12	puf6	diploid
4604	4	2	pos28	WT	1	4	7	273	2.7	2.7.4	PUF6/puf6- SSD1/ssd1- 3n.Chr12	puf6	diploid
4605	4	2	pos29	puf6	1	1	8	141	2.8	2.8.1	PUF6/puf6- SSD1/ssd1- 3n.Chr12	puf6	diploid
4606	4	2	pos30	ssd1_puf6	1	2	8	35	2.8	2.8.2	PUF6/puf6- SSD1/ssd1- 3n.Chr12	puf6	diploid
4607	4	2	pos31	WT	0	3	8	324	2.8	2.8.3	PUF6/puf6- SSD1/ssd1- 3n.Chr12	puf6	diploid
4608	4	2	pos32	ssd1	0	4	8	341	2.8	2.8.4	PUF6/puf6- SSD1/ssd1- 3n.Chr12	puf6	diploid
4609	4	3	pos1	ssd1	1	1	1	105	3.1	3.1.1	PUF6/puf6- SSD1/ssd1- 3n.Chr12	puf6	diploid
4610	4	3	pos2	WT	0	2	1	233	3.1	3.1.2	PUF6/puf6- SSD1/ssd1- 3n.Chr12	puf6	diploid
4611	4	3	pos3	puf6	1	3	1	176	3.1	3.1.3	PUF6/puf6- SSD1/ssd1- 3n.Chr12	puf6	diploid
4612	4	3	pos4	ssd1_puf6	0	4	1	358	3.1	3.1.4	PUF6/puf6- SSD1/ssd1- 3n.Chr12	puf6	diploid
4613	4	3	pos5	puf6	1	1	2	160	3.2	3.2.1	PUF6/puf6- SSD1/ssd1- 3n.Chr12	puf6	diploid
4614	4	3	pos6	ssd1	1	2	2	93	3.2	3.2.2	PUF6/puf6- SSD1/ssd1- 3n.Chr12	puf6	diploid
4615	4	3	pos7	ssd1_puf6	0	3	2	268	3.2	3.2.3	PUF6/puf6- SSD1/ssd1- 3n.Chr12	puf6	diploid
4616	4	3	pos8	WT	0	4	2	357	3.2	3.2.4	PUF6/puf6- SSD1/ssd1- 3n.Chr12	puf6	diploid
4617	4	3	pos9	WT	0	1	3	320	3.3	3.3.1	PUF6/puf6- SSD1/ssd1- 3n.Chr12	puf6	diploid
4618	4	3	pos10	ssd1_puf6	0	2	3	265	3.3	3.3.2	PUF6/puf6- SSD1/ssd1- 3n.Chr12	puf6	diploid
4619	4	3	pos11	ssd1_puf6	1	3	3	42	3.3	3.3.3	PUF6/puf6- SSD1/ssd1- 3n.Chr12	puf6	diploid
4620	4	3	pos12	WT	1	4	3	372	3.3	3.3.4	PUF6/puf6- SSD1/ssd1- 3n.Chr12	puf6	diploid
4621	4	3	pos13	WT	1	1	4	275	3.4	3.4.1	PUF6/puf6- SSD1/ssd1- 3n.Chr12	puf6	diploid
4622	4	3	pos14	ssd1	0	2	4	358	3.4	3.4.2	PUF6/puf6- SSD1/ssd1- 3n.Chr12	puf6	diploid
4623	4	3	pos15	puf6	1	3	4	157	3.4	3.4.3	PUF6/puf6- SSD1/ssd1- 3n.Chr12	puf6	diploid
4624	4	3	pos16	ssd1_puf6	0	4	4	246	3.4	3.4.4	PUF6/puf6- SSD1/ssd1- 3n.Chr12	puf6	diploid
4625	4	3	pos17	WT	1	1	5	279	3.5	3.5.1	PUF6/puf6- SSD1/ssd1- 3n.Chr12	puf6	diploid
4626	4	3	pos18	ssd1_puf6	0	2	5	250	3.5	3.5.2	PUF6/puf6- SSD1/ssd1- 3n.Chr12	puf6	diploid
4627	4	3	pos19	puf6	1	3	5	181	3.5	3.5.3	PUF6/puf6- SSD1/ssd1- 3n.Chr12	puf6	diploid
4628	4	3	pos20	ssd1	0	4	5	354	3.5	3.5.4	PUF6/puf6- SSD1/ssd1- 3n.Chr12	puf6	diploid
4629	4	3	pos21	ssd1_puf6	1	1	6	45	3.6	3.6.1	PUF6/puf6- SSD1/ssd1- 3n.Chr12	puf6	diploid
4630	4	3	pos22	ssd1_puf6	0	2	6	264	3.6	3.6.2	PUF6/puf6- SSD1/ssd1- 3n.Chr12	puf6	diploid
4631	4	3	pos23	WT	0	3	6	186	3.6	3.6.3	PUF6/puf6- SSD1/ssd1- 3n.Chr12	puf6	diploid
4632	4	3	pos24	WT	1	4	6	265	3.6	3.6.4	PUF6/puf6- SSD1/ssd1- 3n.Chr12	puf6	diploid
4633	4	3	pos25	WT	1	1	7	269	3.7	3.7.1	PUF6/puf6- SSD1/ssd1- 3n.Chr12	puf6	diploid
4634	4	3	pos26	ssd1	0	2	7	308	3.7	3.7.2	PUF6/puf6- SSD1/ssd1- 3n.Chr12	puf6	diploid
4635	4	3	pos27	ssd1_puf6	0	3	7	260	3.7	3.7.3	PUF6/puf6- SSD1/ssd1- 3n.Chr12	puf6	diploid
4636	4	3	pos28	puf6	1	4	7	155	3.7	3.7.4	PUF6/puf6- SSD1/ssd1- 3n.Chr12	puf6	diploid
4637	4	3	pos29	ssd1_puf6	0	1	8	269	3.8	3.8.1	PUF6/puf6- SSD1/ssd1- 3n.Chr12	puf6	diploid
4638	4	3	pos30	ssd1	1	2	8	91	3.8	3.8.2	PUF6/puf6- SSD1/ssd1- 3n.Chr12	puf6	diploid
4639	4	3	pos31	WT	1	3	8	295	3.8	3.8.3	PUF6/puf6- SSD1/ssd1- 3n.Chr12	puf6	diploid
4640	4	3	pos32	puf6	0	4	8	227	3.8	3.8.4	PUF6/puf6- SSD1/ssd1- 3n.Chr12	puf6	diploid
4641	4	4	pos1	ssd1_puf6	0	1	1	222	4.1	4.1.1	PUF6/puf6- SSD1/ssd1- 3n.Chr12	puf6	diploid
4642	4	4	pos2	WT	1	2	1	291	4.1	4.1.2	PUF6/puf6- SSD1/ssd1- 3n.Chr12	puf6	diploid
4643	4	4	pos3	ssd1_puf6	1	3	1	45	4.1	4.1.3	PUF6/puf6- SSD1/ssd1- 3n.Chr12	puf6	diploid
4644	4	4	pos4	WT	0	4	1	363	4.1	4.1.4	PUF6/puf6- SSD1/ssd1- 3n.Chr12	puf6	diploid
4645	4	4	pos5	WT	1	1	2	272	4.2	4.2.1	PUF6/puf6- SSD1/ssd1- 3n.Chr12	puf6	diploid
4646	4	4	pos6	puf6	0	2	2	212	4.2	4.2.2	PUF6/puf6- SSD1/ssd1- 3n.Chr12	puf6	diploid
4647	4	4	pos7	ssd1_puf6	0	3	2	215	4.2	4.2.3	PUF6/puf6- SSD1/ssd1- 3n.Chr12	puf6	diploid
4648	4	4	pos8	ssd1	1	4	2	88	4.2	4.2.4	PUF6/puf6- SSD1/ssd1- 3n.Chr12	puf6	diploid
4649	4	4	pos13	ssd1	0	1	4	309	4.4	4.4.1	PUF6/puf6- SSD1/ssd1- 3n.Chr12	puf6	diploid
4650	4	4	pos14	WT	1	2	4	283	4.4	4.4.2	PUF6/puf6- SSD1/ssd1- 3n.Chr12	puf6	diploid
4651	4	4	pos15	puf6	1	3	4	152	4.4	4.4.3	PUF6/puf6- SSD1/ssd1- 3n.Chr12	puf6	diploid
4652	4	4	pos16	ssd1_puf6	0	4	4	272	4.4	4.4.4	PUF6/puf6- SSD1/ssd1- 3n.Chr12	puf6	diploid
4653	4	4	pos17	puf6	0	1	5	150	4.5	4.5.1	PUF6/puf6- SSD1/ssd1- 3n.Chr12	puf6	diploid
4654	4	4	pos18	puf6	1	2	5	190	4.5	4.5.2	PUF6/puf6- SSD1/ssd1- 3n.Chr12	puf6	diploid
4655	4	4	pos19	ssd1	0	3	5	327	4.5	4.5.3	PUF6/puf6- SSD1/ssd1- 3n.Chr12	puf6	diploid
4656	4	4	pos20	ssd1	1	4	5	82	4.5	4.5.4	PUF6/puf6- SSD1/ssd1- 3n.Chr12	puf6	diploid
4657	4	4	pos21	WT	1	1	6	282	4.6	4.6.1	PUF6/puf6- SSD1/ssd1- 3n.Chr12	puf6	diploid
4658	4	4	pos22	ssd1	0	2	6	354	4.6	4.6.2	PUF6/puf6- SSD1/ssd1- 3n.Chr12	puf6	diploid
4659	4	4	pos23	ssd1_puf6	0	3	6	185	4.6	4.6.3	PUF6/puf6- SSD1/ssd1- 3n.Chr12	puf6	diploid
4660	4	4	pos24	puf6	1	4	6	162	4.6	4.6.4	PUF6/puf6- SSD1/ssd1- 3n.Chr12	puf6	diploid
4661	4	4	pos25	ssd1	0	1	7	356	4.7	4.7.1	PUF6/puf6- SSD1/ssd1- 3n.Chr12	puf6	diploid
4662	4	4	pos26	ssd1	1	2	7	115	4.7	4.7.2	PUF6/puf6- SSD1/ssd1- 3n.Chr12	puf6	diploid
4663	4	4	pos27	puf6	1	3	7	139	4.7	4.7.3	PUF6/puf6- SSD1/ssd1- 3n.Chr12	puf6	diploid
4664	4	4	pos28	puf6	0	4	7	233	4.7	4.7.4	PUF6/puf6- SSD1/ssd1- 3n.Chr12	puf6	diploid
4665	4	4	pos29	ssd1_puf6	1	1	8	40	4.8	4.8.1	PUF6/puf6- SSD1/ssd1- 3n.Chr12	puf6	diploid
4666	4	4	pos30	WT	0	2	8	358	4.8	4.8.2	PUF6/puf6- SSD1/ssd1- 3n.Chr12	puf6	diploid
4667	4	4	pos31	ssd1_puf6	0	3	8	202	4.8	4.8.3	PUF6/puf6- SSD1/ssd1- 3n.Chr12	puf6	diploid
4668	4	4	pos32	WT	1	4	8	304	4.8	4.8.4	PUF6/puf6- SSD1/ssd1- 3n.Chr12	puf6	diploid
4669	4	5	pos1	ssd1	0	1	1	321	5.1	5.1.1	PUF6/puf6- SSD1/ssd1- 3n.Chr12	puf6	diploid
4670	4	5	pos2	ssd1_puf6	1	2	1	51	5.1	5.1.2	PUF6/puf6- SSD1/ssd1- 3n.Chr12	puf6	diploid
4671	4	5	pos3	WT	0	3	1	295	5.1	5.1.3	PUF6/puf6- SSD1/ssd1- 3n.Chr12	puf6	diploid
4672	4	5	pos4	puf6	1	4	1	162	5.1	5.1.4	PUF6/puf6- SSD1/ssd1- 3n.Chr12	puf6	diploid
4673	4	5	pos5	ssd1_puf6	1	1	2	42	5.2	5.2.1	PUF6/puf6- SSD1/ssd1- 3n.Chr12	puf6	diploid
4674	4	5	pos6	WT	0	2	2	310	5.2	5.2.2	PUF6/puf6- SSD1/ssd1- 3n.Chr12	puf6	diploid
4675	4	5	pos7	WT	1	3	2	278	5.2	5.2.3	PUF6/puf6- SSD1/ssd1- 3n.Chr12	puf6	diploid
4676	4	5	pos8	ssd1_puf6	0	4	2	267	5.2	5.2.4	PUF6/puf6- SSD1/ssd1- 3n.Chr12	puf6	diploid
4677	4	5	pos9	ssd1	0	1	3	368	5.3	5.3.1	PUF6/puf6- SSD1/ssd1- 3n.Chr12	puf6	diploid
4678	4	5	pos10	WT	1	2	3	267	5.3	5.3.2	PUF6/puf6- SSD1/ssd1- 3n.Chr12	puf6	diploid
4679	4	5	pos11	ssd1_puf6	1	3	3	9	5.3	5.3.3	PUF6/puf6- SSD1/ssd1- 3n.Chr12	puf6	diploid
4680	4	5	pos12	puf6	0	4	3	261	5.3	5.3.4	PUF6/puf6- SSD1/ssd1- 3n.Chr12	puf6	diploid
4681	4	5	pos13	ssd1_puf6	0	1	4	267	5.4	5.4.1	PUF6/puf6- SSD1/ssd1- 3n.Chr12	puf6	diploid
4682	4	5	pos14	WT	0	2	4	337	5.4	5.4.2	PUF6/puf6- SSD1/ssd1- 3n.Chr12	puf6	diploid
4683	4	5	pos15	ssd1	1	3	4	84	5.4	5.4.3	PUF6/puf6- SSD1/ssd1- 3n.Chr12	puf6	diploid
4684	4	5	pos16	puf6	1	4	4	177	5.4	5.4.4	PUF6/puf6- SSD1/ssd1- 3n.Chr12	puf6	diploid
4689	4	5	pos21	ssd1	0	1	6	411	5.6	5.6.1	PUF6/puf6- SSD1/ssd1- 3n.Chr12	puf6	diploid
4690	4	5	pos22	ssd1_puf6	1	2	6	48	5.6	5.6.2	PUF6/puf6- SSD1/ssd1- 3n.Chr12	puf6	diploid
4691	4	5	pos23	WT	1	3	6	287	5.6	5.6.3	PUF6/puf6- SSD1/ssd1- 3n.Chr12	puf6	diploid
4692	4	5	pos24	puf6	0	4	6	254	5.6	5.6.4	PUF6/puf6- SSD1/ssd1- 3n.Chr12	puf6	diploid
4697	4	5	pos29	puf6	0	1	8	263	5.8	5.8.1	PUF6/puf6- SSD1/ssd1- 3n.Chr12	puf6	diploid
4698	4	5	pos30	puf6	0	2	8	245	5.8	5.8.2	PUF6/puf6- SSD1/ssd1- 3n.Chr12	puf6	diploid
4699	4	5	pos31	ssd1	1	3	8	133	5.8	5.8.3	PUF6/puf6- SSD1/ssd1- 3n.Chr12	puf6	diploid
4700	4	5	pos32	ssd1	1	4	8	108	5.8	5.8.4	PUF6/puf6- SSD1/ssd1- 3n.Chr12	puf6	diploid
4701	4	6	pos1	ssd1	1	1	1	95	6.1	6.1.1	PUF6/puf6- SSD1/ssd1- 3n.Chr12	puf6	diploid
4702	4	6	pos2	puf6	0	2	1	239	6.1	6.1.2	PUF6/puf6- SSD1/ssd1- 3n.Chr12	puf6	diploid
4703	4	6	pos3	WT	0	3	1	318	6.1	6.1.3	PUF6/puf6- SSD1/ssd1- 3n.Chr12	puf6	diploid
4704	4	6	pos4	ssd1_puf6	1	4	1	41	6.1	6.1.4	PUF6/puf6- SSD1/ssd1- 3n.Chr12	puf6	diploid
4709	4	6	pos9	ssd1	0	1	3	396	6.3	6.3.1	PUF6/puf6- SSD1/ssd1- 3n.Chr12	puf6	diploid
4711	4	6	pos11	ssd1_puf6	1	3	3	49	6.3	6.3.3	PUF6/puf6- SSD1/ssd1- 3n.Chr12	puf6	diploid
4717	4	6	pos17	ssd1	0	1	5	331	6.5	6.5.1	PUF6/puf6- SSD1/ssd1- 3n.Chr12	puf6	diploid
4718	4	6	pos18	ssd1_puf6	1	2	5	38	6.5	6.5.2	PUF6/puf6- SSD1/ssd1- 3n.Chr12	puf6	diploid
4719	4	6	pos19	puf6	0	3	5	243	6.5	6.5.3	PUF6/puf6- SSD1/ssd1- 3n.Chr12	puf6	diploid
4720	4	6	pos20	WT	1	4	5	321	6.5	6.5.4	PUF6/puf6- SSD1/ssd1- 3n.Chr12	puf6	diploid
4721	4	6	pos21	ssd1	0	1	6	384	6.6	6.6.1	PUF6/puf6- SSD1/ssd1- 3n.Chr12	puf6	diploid
4722	4	6	pos22	puf6	1	2	6	172	6.6	6.6.2	PUF6/puf6- SSD1/ssd1- 3n.Chr12	puf6	diploid
4723	4	6	pos23	WT	0	3	6	377	6.6	6.6.3	PUF6/puf6- SSD1/ssd1- 3n.Chr12	puf6	diploid
4724	4	6	pos24	ssd1_puf6	1	4	6	51	6.6	6.6.4	PUF6/puf6- SSD1/ssd1- 3n.Chr12	puf6	diploid
4725	4	6	pos25	ssd1_puf6	0	1	7	263	6.7	6.7.1	PUF6/puf6- SSD1/ssd1- 3n.Chr12	puf6	diploid
4726	4	6	pos26	WT	1	2	7	271	6.7	6.7.2	PUF6/puf6- SSD1/ssd1- 3n.Chr12	puf6	diploid
4727	4	6	pos27	ssd1_puf6	0	3	7	238	6.7	6.7.3	PUF6/puf6- SSD1/ssd1- 3n.Chr12	puf6	diploid
4728	4	6	pos28	WT	1	4	7	319	6.7	6.7.4	PUF6/puf6- SSD1/ssd1- 3n.Chr12	puf6	diploid
4729	4	6	pos29	puf6	1	1	8	172	6.8	6.8.1	PUF6/puf6- SSD1/ssd1- 3n.Chr12	puf6	diploid
4730	4	6	pos30	ssd1_puf6	1	2	8	53	6.8	6.8.2	PUF6/puf6- SSD1/ssd1- 3n.Chr12	puf6	diploid
4731	4	6	pos31	WT	0	3	8	395	6.8	6.8.3	PUF6/puf6- SSD1/ssd1- 3n.Chr12	puf6	diploid
4732	4	6	pos32	ssd1	0	4	8	361	6.8	6.8.4	PUF6/puf6- SSD1/ssd1- 3n.Chr12	puf6	diploid
4738	8	1	pos6	ssd1	1	2	2	96	1.2	1.2.2	MPT5/mpt5- SSD1/ssd1- 3n.Chr12	mpt5	diploid
4739	8	1	pos7	ssd1	0	3	2	387	1.2	1.2.3	MPT5/mpt5- SSD1/ssd1- 3n.Chr12	mpt5	diploid
4743	8	1	pos11	ssd1	0	3	3	348	1.3	1.3.3	MPT5/mpt5- SSD1/ssd1- 3n.Chr12	mpt5	diploid
4744	8	1	pos12	ssd1_mpt5	1	4	3	27	1.3	1.3.4	MPT5/mpt5- SSD1/ssd1- 3n.Chr12	mpt5	diploid
4745	8	1	pos13	ssd1_mpt5	0	1	4	241	1.4	1.4.1	MPT5/mpt5- SSD1/ssd1- 3n.Chr12	mpt5	diploid
4746	8	1	pos14	mpt5	1	2	4	282	1.4	1.4.2	MPT5/mpt5- SSD1/ssd1- 3n.Chr12	mpt5	diploid
4747	8	1	pos15	WT	1	3	4	266	1.4	1.4.3	MPT5/mpt5- SSD1/ssd1- 3n.Chr12	mpt5	diploid
4748	8	1	pos16	ssd1	0	4	4	339	1.4	1.4.4	MPT5/mpt5- SSD1/ssd1- 3n.Chr12	mpt5	diploid
4751	8	1	pos19	ssd1	0	3	5	347	1.5	1.5.3	MPT5/mpt5- SSD1/ssd1- 3n.Chr12	mpt5	diploid
4752	8	1	pos20	ssd1_mpt5	1	4	5	34	1.5	1.5.4	MPT5/mpt5- SSD1/ssd1- 3n.Chr12	mpt5	diploid
4753	8	1	pos25	ssd1	0	1	7	341	1.7	1.7.1	MPT5/mpt5- SSD1/ssd1- 3n.Chr12	mpt5	diploid
4754	8	1	pos26	ssd1_mpt5	0	2	7	245	1.7	1.7.2	MPT5/mpt5- SSD1/ssd1- 3n.Chr12	mpt5	diploid
4755	8	1	pos27	WT	1	3	7	282	1.7	1.7.3	MPT5/mpt5- SSD1/ssd1- 3n.Chr12	mpt5	diploid
4756	8	1	pos28	mpt5	1	4	7	288	1.7	1.7.4	MPT5/mpt5- SSD1/ssd1- 3n.Chr12	mpt5	diploid
4757	8	1	pos29	ssd1	1	1	8	90	1.8	1.8.1	MPT5/mpt5- SSD1/ssd1- 3n.Chr12	mpt5	diploid
4758	8	1	pos30	mpt5	0	2	8	386	1.8	1.8.2	MPT5/mpt5- SSD1/ssd1- 3n.Chr12	mpt5	diploid
4759	8	1	pos31	WT	0	3	8	356	1.8	1.8.3	MPT5/mpt5- SSD1/ssd1- 3n.Chr12	mpt5	diploid
4760	8	1	pos32	ssd1_mpt5	1	4	8	34	1.8	1.8.4	MPT5/mpt5- SSD1/ssd1- 3n.Chr12	mpt5	diploid
4761	8	2	pos1	ssd1_mpt5	0	1	1	256	2.1	2.1.1	MPT5/mpt5- SSD1/ssd1- 3n.Chr12	mpt5	diploid
4762	8	2	pos2	ssd1_mpt5	1	2	1	48	2.1	2.1.2	MPT5/mpt5- SSD1/ssd1- 3n.Chr12	mpt5	diploid
4765	8	2	pos5	ssd1	0	1	2	325	2.2	2.2.1	MPT5/mpt5- SSD1/ssd1- 3n.Chr12	mpt5	diploid
4766	8	2	pos6	WT	1	2	2	283	2.2	2.2.2	MPT5/mpt5- SSD1/ssd1- 3n.Chr12	mpt5	diploid
4767	8	2	pos7	mpt5	1	3	2	290	2.2	2.2.3	MPT5/mpt5- SSD1/ssd1- 3n.Chr12	mpt5	diploid
4768	8	2	pos8	ssd1_mpt5	0	4	2	223	2.2	2.2.4	MPT5/mpt5- SSD1/ssd1- 3n.Chr12	mpt5	diploid
4771	8	2	pos11	ssd1_mpt5	1	3	3	30	2.3	2.3.3	MPT5/mpt5- SSD1/ssd1- 3n.Chr12	mpt5	diploid
4772	8	2	pos12	ssd1	0	4	3	334	2.3	2.3.4	MPT5/mpt5- SSD1/ssd1- 3n.Chr12	mpt5	diploid
4773	8	2	pos13	ssd1	0	1	4	377	2.4	2.4.1	MPT5/mpt5- SSD1/ssd1- 3n.Chr12	mpt5	diploid
4775	8	2	pos15	ssd1	1	3	4	72	2.4	2.4.3	MPT5/mpt5- SSD1/ssd1- 3n.Chr12	mpt5	diploid
4777	8	2	pos17	ssd1_mpt5	1	1	5	14	2.5	2.5.1	MPT5/mpt5- SSD1/ssd1- 3n.Chr12	mpt5	diploid
4778	8	2	pos18	mpt5	0	2	5	437	2.5	2.5.2	MPT5/mpt5- SSD1/ssd1- 3n.Chr12	mpt5	diploid
4779	8	2	pos19	ssd1	1	3	5	88	2.5	2.5.3	MPT5/mpt5- SSD1/ssd1- 3n.Chr12	mpt5	diploid
4780	8	2	pos20	WT	0	4	5	369	2.5	2.5.4	MPT5/mpt5- SSD1/ssd1- 3n.Chr12	mpt5	diploid
4785	8	2	pos25	ssd1_mpt5	1	1	7	57	2.7	2.7.1	MPT5/mpt5- SSD1/ssd1- 3n.Chr12	mpt5	diploid
4787	8	2	pos27	ssd1	0	3	7	333	2.7	2.7.3	MPT5/mpt5- SSD1/ssd1- 3n.Chr12	mpt5	diploid
4791	8	2	pos31	ssd1	0	3	8	329	2.8	2.8.3	MPT5/mpt5- SSD1/ssd1- 3n.Chr12	mpt5	diploid
4793	8	3	pos1	ssd1_mpt5	0	1	1	251	3.1	3.1.1	MPT5/mpt5- SSD1/ssd1- 3n.Chr12	mpt5	diploid
4794	8	3	pos2	WT	1	2	1	293	3.1	3.1.2	MPT5/mpt5- SSD1/ssd1- 3n.Chr12	mpt5	diploid
4795	8	3	pos3	WT	1	3	1	264	3.1	3.1.3	MPT5/mpt5- SSD1/ssd1- 3n.Chr12	mpt5	diploid
4796	8	3	pos4	ssd1_mpt5	0	4	1	297	3.1	3.1.4	MPT5/mpt5- SSD1/ssd1- 3n.Chr12	mpt5	diploid
4797	8	3	pos5	WT	0	1	2	226	3.2	3.2.1	MPT5/mpt5- SSD1/ssd1- 3n.Chr12	mpt5	diploid
4798	8	3	pos6	ssd1	1	2	2	81	3.2	3.2.2	MPT5/mpt5- SSD1/ssd1- 3n.Chr12	mpt5	diploid
4799	8	3	pos7	mpt5	0	3	2	421	3.2	3.2.3	MPT5/mpt5- SSD1/ssd1- 3n.Chr12	mpt5	diploid
4800	8	3	pos8	ssd1_mpt5	1	4	2	26	3.2	3.2.4	MPT5/mpt5- SSD1/ssd1- 3n.Chr12	mpt5	diploid
4801	8	3	pos13	ssd1_mpt5	1	1	4	31	3.4	3.4.1	MPT5/mpt5- SSD1/ssd1- 3n.Chr12	mpt5	diploid
4804	8	3	pos16	ssd1	0	4	4	358	3.4	3.4.4	MPT5/mpt5- SSD1/ssd1- 3n.Chr12	mpt5	diploid
4806	8	3	pos18	ssd1	0	2	5	299	3.5	3.5.2	MPT5/mpt5- SSD1/ssd1- 3n.Chr12	mpt5	diploid
4809	8	3	pos21	ssd1_mpt5	0	1	6	260	3.6	3.6.1	MPT5/mpt5- SSD1/ssd1- 3n.Chr12	mpt5	diploid
4810	8	3	pos22	WT	1	2	6	276	3.6	3.6.2	MPT5/mpt5- SSD1/ssd1- 3n.Chr12	mpt5	diploid
4811	8	3	pos23	WT	1	3	6	275	3.6	3.6.3	MPT5/mpt5- SSD1/ssd1- 3n.Chr12	mpt5	diploid
4812	8	3	pos24	ssd1_mpt5	0	4	6	261	3.6	3.6.4	MPT5/mpt5- SSD1/ssd1- 3n.Chr12	mpt5	diploid
4814	8	3	pos26	ssd1	0	2	7	351	3.7	3.7.2	MPT5/mpt5- SSD1/ssd1- 3n.Chr12	mpt5	diploid
4815	8	3	pos27	ssd1_mpt5	1	3	7	22	3.7	3.7.3	MPT5/mpt5- SSD1/ssd1- 3n.Chr12	mpt5	diploid
4819	8	3	pos31	ssd1_mpt5	1	3	8	24	3.8	3.8.3	MPT5/mpt5- SSD1/ssd1- 3n.Chr12	mpt5	diploid
4820	8	3	pos32	ssd1_mpt5	0	4	8	281	3.8	3.8.4	MPT5/mpt5- SSD1/ssd1- 3n.Chr12	mpt5	diploid
4821	9	1	pos1	WT	1	1	1	266	1.1	1.1.1	ISW1/isw1- SSD1/ssd1- 3n.Chr12	isw1	diploid
4822	9	1	pos2	WT	0	2	1	350	1.1	1.1.2	ISW1/isw1- SSD1/ssd1- 3n.Chr12	isw1	diploid
4823	9	1	pos3	ssd1_isw1	0	3	1	278	1.1	1.1.3	ISW1/isw1- SSD1/ssd1- 3n.Chr12	isw1	diploid
4824	9	1	pos4	ssd1_isw1	1	4	1	82	1.1	1.1.4	ISW1/isw1- SSD1/ssd1- 3n.Chr12	isw1	diploid
4829	9	1	pos9	isw1	1	1	3	323	1.3	1.3.1	ISW1/isw1- SSD1/ssd1- 3n.Chr12	isw1	diploid
4830	9	1	pos10	WT	1	2	3	319	1.3	1.3.2	ISW1/isw1- SSD1/ssd1- 3n.Chr12	isw1	diploid
4831	9	1	pos11	ssd1	0	3	3	420	1.3	1.3.3	ISW1/isw1- SSD1/ssd1- 3n.Chr12	isw1	diploid
4832	9	1	pos12	ssd1_isw1	0	4	3	329	1.3	1.3.4	ISW1/isw1- SSD1/ssd1- 3n.Chr12	isw1	diploid
4841	9	1	pos21	isw1	1	1	6	294	1.6	1.6.1	ISW1/isw1- SSD1/ssd1- 3n.Chr12	isw1	diploid
4842	9	1	pos22	ssd1	0	2	6	380	1.6	1.6.2	ISW1/isw1- SSD1/ssd1- 3n.Chr12	isw1	diploid
4843	9	1	pos23	WT	1	3	6	323	1.6	1.6.3	ISW1/isw1- SSD1/ssd1- 3n.Chr12	isw1	diploid
4844	9	1	pos24	ssd1_isw1	0	4	6	373	1.6	1.6.4	ISW1/isw1- SSD1/ssd1- 3n.Chr12	isw1	diploid
4849	9	1	pos29	WT	1	1	8	356	1.8	1.8.1	ISW1/isw1- SSD1/ssd1- 3n.Chr12	isw1	diploid
4850	9	1	pos30	WT	0	2	8	388	1.8	1.8.2	ISW1/isw1- SSD1/ssd1- 3n.Chr12	isw1	diploid
4851	9	1	pos31	ssd1_isw1	0	3	8	361	1.8	1.8.3	ISW1/isw1- SSD1/ssd1- 3n.Chr12	isw1	diploid
4852	9	1	pos32	ssd1_isw1	1	4	8	73	1.8	1.8.4	ISW1/isw1- SSD1/ssd1- 3n.Chr12	isw1	diploid
4853	9	2	pos1	ssd1	0	1	1	395	2.1	2.1.1	ISW1/isw1- SSD1/ssd1- 3n.Chr12	isw1	diploid
4854	9	2	pos2	WT	1	2	1	307	2.1	2.1.2	ISW1/isw1- SSD1/ssd1- 3n.Chr12	isw1	diploid
4855	9	2	pos3	ssd1_isw1	0	3	1	402	2.1	2.1.3	ISW1/isw1- SSD1/ssd1- 3n.Chr12	isw1	diploid
4856	9	2	pos4	isw1	1	4	1	68	2.1	2.1.4	ISW1/isw1- SSD1/ssd1- 3n.Chr12	isw1	diploid
4859	9	2	pos7	ssd1_isw1	0	3	2	324	2.2	2.2.3	ISW1/isw1- SSD1/ssd1- 3n.Chr12	isw1	diploid
4860	9	2	pos8	ssd1_isw1	1	4	2	72	2.2	2.2.4	ISW1/isw1- SSD1/ssd1- 3n.Chr12	isw1	diploid
4861	9	2	pos9	ssd1	1	1	3	67	2.3	2.3.1	ISW1/isw1- SSD1/ssd1- 3n.Chr12	isw1	diploid
4862	9	2	pos10	ssd1	0	2	3	394	2.3	2.3.2	ISW1/isw1- SSD1/ssd1- 3n.Chr12	isw1	diploid
4863	9	2	pos11	isw1	1	3	3	305	2.3	2.3.3	ISW1/isw1- SSD1/ssd1- 3n.Chr12	isw1	diploid
4864	9	2	pos12	isw1	0	4	3	448	2.3	2.3.4	ISW1/isw1- SSD1/ssd1- 3n.Chr12	isw1	diploid
4869	9	2	pos21	WT	1	1	6	328	2.6	2.6.1	ISW1/isw1- SSD1/ssd1- 3n.Chr12	isw1	diploid
4870	9	2	pos22	WT	0	2	6	392	2.6	2.6.2	ISW1/isw1- SSD1/ssd1- 3n.Chr12	isw1	diploid
4871	9	2	pos23	ssd1_isw1	0	3	6	307	2.6	2.6.3	ISW1/isw1- SSD1/ssd1- 3n.Chr12	isw1	diploid
4872	9	2	pos24	ssd1_isw1	1	4	6	62	2.6	2.6.4	ISW1/isw1- SSD1/ssd1- 3n.Chr12	isw1	diploid
4873	9	2	pos25	ssd1	0	1	7	415	2.7	2.7.1	ISW1/isw1- SSD1/ssd1- 3n.Chr12	isw1	diploid
4874	9	2	pos26	isw1	1	2	7	253	2.7	2.7.2	ISW1/isw1- SSD1/ssd1- 3n.Chr12	isw1	diploid
4875	9	2	pos27	isw1	1	3	7	268	2.7	2.7.3	ISW1/isw1- SSD1/ssd1- 3n.Chr12	isw1	diploid
4876	9	2	pos28	ssd1	0	4	7	428	2.7	2.7.4	ISW1/isw1- SSD1/ssd1- 3n.Chr12	isw1	diploid
4877	9	2	pos29	WT	0	1	8	404	2.8	2.8.1	ISW1/isw1- SSD1/ssd1- 3n.Chr12	isw1	diploid
4878	9	2	pos30	ssd1_isw1	0	2	8	341	2.8	2.8.2	ISW1/isw1- SSD1/ssd1- 3n.Chr12	isw1	diploid
4879	9	2	pos31	ssd1	1	3	8	59	2.8	2.8.3	ISW1/isw1- SSD1/ssd1- 3n.Chr12	isw1	diploid
4880	9	2	pos32	isw1	1	4	8	329	2.8	2.8.4	ISW1/isw1- SSD1/ssd1- 3n.Chr12	isw1	diploid
4881	9	3	pos1	ssd1_isw1	0	1	1	286	3.1	3.1.1	ISW1/isw1- SSD1/ssd1- 3n.Chr12	isw1	diploid
4882	9	3	pos2	WT	0	2	1	352	3.1	3.1.2	ISW1/isw1- SSD1/ssd1- 3n.Chr12	isw1	diploid
4883	9	3	pos3	WT	1	3	1	296	3.1	3.1.3	ISW1/isw1- SSD1/ssd1- 3n.Chr12	isw1	diploid
4884	9	3	pos4	ssd1_isw1	1	4	1	59	3.1	3.1.4	ISW1/isw1- SSD1/ssd1- 3n.Chr12	isw1	diploid
4885	9	3	pos5	ssd1_isw1	1	1	2	44	3.2	3.2.1	ISW1/isw1- SSD1/ssd1- 3n.Chr12	isw1	diploid
4886	9	3	pos6	WT	1	2	2	303	3.2	3.2.2	ISW1/isw1- SSD1/ssd1- 3n.Chr12	isw1	diploid
4887	9	3	pos7	ssd1_isw1	0	3	2	316	3.2	3.2.3	ISW1/isw1- SSD1/ssd1- 3n.Chr12	isw1	diploid
4888	9	3	pos8	WT	0	4	2	369	3.2	3.2.4	ISW1/isw1- SSD1/ssd1- 3n.Chr12	isw1	diploid
4889	9	3	pos9	ssd1_isw1	0	1	3	316	3.3	3.3.1	ISW1/isw1- SSD1/ssd1- 3n.Chr12	isw1	diploid
4890	9	3	pos10	WT	1	2	3	310	3.3	3.3.2	ISW1/isw1- SSD1/ssd1- 3n.Chr12	isw1	diploid
4891	9	3	pos11	ssd1	1	3	3	72	3.3	3.3.3	ISW1/isw1- SSD1/ssd1- 3n.Chr12	isw1	diploid
4892	9	3	pos12	isw1	0	4	3	357	3.3	3.3.4	ISW1/isw1- SSD1/ssd1- 3n.Chr12	isw1	diploid
4893	9	3	pos13	ssd1	0	1	4	271	3.4	3.4.1	ISW1/isw1- SSD1/ssd1- 3n.Chr12	isw1	diploid
4894	9	3	pos14	WT	1	2	4	284	3.4	3.4.2	ISW1/isw1- SSD1/ssd1- 3n.Chr12	isw1	diploid
4895	9	3	pos15	ssd1_isw1	1	3	4	58	3.4	3.4.3	ISW1/isw1- SSD1/ssd1- 3n.Chr12	isw1	diploid
4896	9	3	pos16	isw1	0	4	4	332	3.4	3.4.4	ISW1/isw1- SSD1/ssd1- 3n.Chr12	isw1	diploid
4905	9	3	pos25	WT	1	1	7	294	3.7	3.7.1	ISW1/isw1- SSD1/ssd1- 3n.Chr12	isw1	diploid
4906	9	3	pos26	WT	0	2	7	389	3.7	3.7.2	ISW1/isw1- SSD1/ssd1- 3n.Chr12	isw1	diploid
4907	9	3	pos27	ssd1_isw1	1	3	7	60	3.7	3.7.3	ISW1/isw1- SSD1/ssd1- 3n.Chr12	isw1	diploid
4908	9	3	pos28	ssd1_isw1	0	4	7	327	3.7	3.7.4	ISW1/isw1- SSD1/ssd1- 3n.Chr12	isw1	diploid
4909	9	3	pos29	ssd1	0	1	8	412	3.8	3.8.1	ISW1/isw1- SSD1/ssd1- 3n.Chr12	isw1	diploid
4910	9	3	pos30	isw1	0	2	8	392	3.8	3.8.2	ISW1/isw1- SSD1/ssd1- 3n.Chr12	isw1	diploid
4911	9	3	pos31	WT	1	3	8	339	3.8	3.8.3	ISW1/isw1- SSD1/ssd1- 3n.Chr12	isw1	diploid
4912	9	3	pos32	ssd1_isw1	1	4	8	66	3.8	3.8.4	ISW1/isw1- SSD1/ssd1- 3n.Chr12	isw1	diploid
4913	9	4	pos1	isw1	1	1	1	260	4.1	4.1.1	ISW1/isw1- SSD1/ssd1- 3n.Chr12	isw1	diploid
4914	9	4	pos2	ssd1_isw1	1	2	1	47	4.1	4.1.2	ISW1/isw1- SSD1/ssd1- 3n.Chr12	isw1	diploid
4915	9	4	pos3	ssd1	0	3	1	375	4.1	4.1.3	ISW1/isw1- SSD1/ssd1- 3n.Chr12	isw1	diploid
4916	9	4	pos4	WT	0	4	1	373	4.1	4.1.4	ISW1/isw1- SSD1/ssd1- 3n.Chr12	isw1	diploid
4921	9	4	pos9	ssd1_isw1	1	1	3	86	4.3	4.3.1	ISW1/isw1- SSD1/ssd1- 3n.Chr12	isw1	diploid
4922	9	4	pos10	WT	0	2	3	368	4.3	4.3.2	ISW1/isw1- SSD1/ssd1- 3n.Chr12	isw1	diploid
4923	9	4	pos11	isw1	1	3	3	271	4.3	4.3.3	ISW1/isw1- SSD1/ssd1- 3n.Chr12	isw1	diploid
4924	9	4	pos12	ssd1	0	4	3	427	4.3	4.3.4	ISW1/isw1- SSD1/ssd1- 3n.Chr12	isw1	diploid
4929	9	4	pos17	ssd1_isw1	0	1	5	318	4.5	4.5.1	ISW1/isw1- SSD1/ssd1- 3n.Chr12	isw1	diploid
4930	9	4	pos18	ssd1_isw1	0	2	5	292	4.5	4.5.2	ISW1/isw1- SSD1/ssd1- 3n.Chr12	isw1	diploid
4931	9	4	pos19	WT	1	3	5	286	4.5	4.5.3	ISW1/isw1- SSD1/ssd1- 3n.Chr12	isw1	diploid
4932	9	4	pos20	WT	1	4	5	311	4.5	4.5.4	ISW1/isw1- SSD1/ssd1- 3n.Chr12	isw1	diploid
4933	9	4	pos21	ssd1	0	1	6	409	4.6	4.6.1	ISW1/isw1- SSD1/ssd1- 3n.Chr12	isw1	diploid
4934	9	4	pos22	isw1	1	2	6	280	4.6	4.6.2	ISW1/isw1- SSD1/ssd1- 3n.Chr12	isw1	diploid
4935	9	4	pos23	ssd1_isw1	1	3	6	46	4.6	4.6.3	ISW1/isw1- SSD1/ssd1- 3n.Chr12	isw1	diploid
4936	9	4	pos24	WT	0	4	6	393	4.6	4.6.4	ISW1/isw1- SSD1/ssd1- 3n.Chr12	isw1	diploid
4937	9	4	pos25	ssd1	1	1	7	71	4.7	4.7.1	ISW1/isw1- SSD1/ssd1- 3n.Chr12	isw1	diploid
4938	9	4	pos26	ssd1_isw1	0	2	7	283	4.7	4.7.2	ISW1/isw1- SSD1/ssd1- 3n.Chr12	isw1	diploid
4939	9	4	pos27	isw1	1	3	7	272	4.7	4.7.3	ISW1/isw1- SSD1/ssd1- 3n.Chr12	isw1	diploid
4940	9	4	pos28	WT	0	4	7	366	4.7	4.7.4	ISW1/isw1- SSD1/ssd1- 3n.Chr12	isw1	diploid
4941	9	4	pos29	ssd1_isw1	0	1	8	320	4.8	4.8.1	ISW1/isw1- SSD1/ssd1- 3n.Chr12	isw1	diploid
4942	9	4	pos30	WT	1	2	8	300	4.8	4.8.2	ISW1/isw1- SSD1/ssd1- 3n.Chr12	isw1	diploid
4943	9	4	pos31	WT	1	3	8	280	4.8	4.8.3	ISW1/isw1- SSD1/ssd1- 3n.Chr12	isw1	diploid
4944	9	4	pos32	ssd1_isw1	0	4	8	387	4.8	4.8.4	ISW1/isw1- SSD1/ssd1- 3n.Chr12	isw1	diploid
4945	9	5	pos1	WT	1	1	1	286	5.1	5.1.1	ISW1/isw1- SSD1/ssd1- 3n.Chr12	isw1	diploid
4946	9	5	pos2	ssd1_isw1	0	2	1	288	5.1	5.1.2	ISW1/isw1- SSD1/ssd1- 3n.Chr12	isw1	diploid
4947	9	5	pos3	ssd1_isw1	0	3	1	291	5.1	5.1.3	ISW1/isw1- SSD1/ssd1- 3n.Chr12	isw1	diploid
4948	9	5	pos4	WT	1	4	1	292	5.1	5.1.4	ISW1/isw1- SSD1/ssd1- 3n.Chr12	isw1	diploid
4949	9	5	pos5	isw1	0	1	2	366	5.2	5.2.1	ISW1/isw1- SSD1/ssd1- 3n.Chr12	isw1	diploid
4950	9	5	pos6	WT	1	2	2	294	5.2	5.2.2	ISW1/isw1- SSD1/ssd1- 3n.Chr12	isw1	diploid
4951	9	5	pos7	ssd1_isw1	0	3	2	288	5.2	5.2.3	ISW1/isw1- SSD1/ssd1- 3n.Chr12	isw1	diploid
4952	9	5	pos8	ssd1	1	4	2	60	5.2	5.2.4	ISW1/isw1- SSD1/ssd1- 3n.Chr12	isw1	diploid
4953	9	5	pos9	ssd1_isw1	1	1	3	57	5.3	5.3.1	ISW1/isw1- SSD1/ssd1- 3n.Chr12	isw1	diploid
4954	9	5	pos10	isw1	0	2	3	353	5.3	5.3.2	ISW1/isw1- SSD1/ssd1- 3n.Chr12	isw1	diploid
4955	9	5	pos11	WT	1	3	3	308	5.3	5.3.3	ISW1/isw1- SSD1/ssd1- 3n.Chr12	isw1	diploid
4956	9	5	pos12	ssd1	0	4	3	425	5.3	5.3.4	ISW1/isw1- SSD1/ssd1- 3n.Chr12	isw1	diploid
4957	9	5	pos13	ssd1	0	1	4	404	5.4	5.4.1	ISW1/isw1- SSD1/ssd1- 3n.Chr12	isw1	diploid
4958	9	5	pos14	WT	1	2	4	318	5.4	5.4.2	ISW1/isw1- SSD1/ssd1- 3n.Chr12	isw1	diploid
4959	9	5	pos15	ssd1_isw1	1	3	4	58	5.4	5.4.3	ISW1/isw1- SSD1/ssd1- 3n.Chr12	isw1	diploid
4960	9	5	pos16	isw1	0	4	4	397	5.4	5.4.4	ISW1/isw1- SSD1/ssd1- 3n.Chr12	isw1	diploid
4961	9	5	pos17	WT	1	1	5	316	5.5	5.5.1	ISW1/isw1- SSD1/ssd1- 3n.Chr12	isw1	diploid
4962	9	5	pos18	isw1	0	2	5	362	5.5	5.5.2	ISW1/isw1- SSD1/ssd1- 3n.Chr12	isw1	diploid
4963	9	5	pos19	ssd1_isw1	0	3	5	307	5.5	5.5.3	ISW1/isw1- SSD1/ssd1- 3n.Chr12	isw1	diploid
4964	9	5	pos20	ssd1	1	4	5	68	5.5	5.5.4	ISW1/isw1- SSD1/ssd1- 3n.Chr12	isw1	diploid
4965	9	5	pos21	isw1	0	1	6	371	5.6	5.6.1	ISW1/isw1- SSD1/ssd1- 3n.Chr12	isw1	diploid
4966	9	5	pos22	ssd1	1	2	6	80	5.6	5.6.2	ISW1/isw1- SSD1/ssd1- 3n.Chr12	isw1	diploid
4967	9	5	pos23	WT	1	3	6	316	5.6	5.6.3	ISW1/isw1- SSD1/ssd1- 3n.Chr12	isw1	diploid
4968	9	5	pos24	ssd1_isw1	0	4	6	349	5.6	5.6.4	ISW1/isw1- SSD1/ssd1- 3n.Chr12	isw1	diploid
4969	9	5	pos25	ssd1	1	1	7	59	5.7	5.7.1	ISW1/isw1- SSD1/ssd1- 3n.Chr12	isw1	diploid
4970	9	5	pos26	isw1	0	2	7	352	5.7	5.7.2	ISW1/isw1- SSD1/ssd1- 3n.Chr12	isw1	diploid
4971	9	5	pos27	WT	1	3	7	272	5.7	5.7.3	ISW1/isw1- SSD1/ssd1- 3n.Chr12	isw1	diploid
4972	9	5	pos28	ssd1_isw1	0	4	7	285	5.7	5.7.4	ISW1/isw1- SSD1/ssd1- 3n.Chr12	isw1	diploid
4973	9	5	pos29	ssd1	0	1	8	401	5.8	5.8.1	ISW1/isw1- SSD1/ssd1- 3n.Chr12	isw1	diploid
4974	9	5	pos30	ssd1_isw1	0	2	8	293	5.8	5.8.2	ISW1/isw1- SSD1/ssd1- 3n.Chr12	isw1	diploid
4975	9	5	pos31	isw1	1	3	8	303	5.8	5.8.3	ISW1/isw1- SSD1/ssd1- 3n.Chr12	isw1	diploid
4976	9	5	pos32	WT	1	4	8	308	5.8	5.8.4	ISW1/isw1- SSD1/ssd1- 3n.Chr12	isw1	diploid
4977	9	6	pos1	WT	0	1	1	367	6.1	6.1.1	ISW1/isw1- SSD1/ssd1- 3n.Chr12	isw1	diploid
4978	9	6	pos2	ssd1_isw1	0	2	1	333	6.1	6.1.2	ISW1/isw1- SSD1/ssd1- 3n.Chr12	isw1	diploid
4979	9	6	pos3	WT	1	3	1	316	6.1	6.1.3	ISW1/isw1- SSD1/ssd1- 3n.Chr12	isw1	diploid
4980	9	6	pos4	ssd1_isw1	1	4	1	54	6.1	6.1.4	ISW1/isw1- SSD1/ssd1- 3n.Chr12	isw1	diploid
4983	9	6	pos7	ssd1_isw1	1	3	2	59	6.2	6.2.3	ISW1/isw1- SSD1/ssd1- 3n.Chr12	isw1	diploid
4984	9	6	pos8	ssd1_isw1	0	4	2	321	6.2	6.2.4	ISW1/isw1- SSD1/ssd1- 3n.Chr12	isw1	diploid
4985	9	6	pos9	ssd1	1	1	3	80	6.3	6.3.1	ISW1/isw1- SSD1/ssd1- 3n.Chr12	isw1	diploid
4986	9	6	pos10	WT	0	2	3	386	6.3	6.3.2	ISW1/isw1- SSD1/ssd1- 3n.Chr12	isw1	diploid
4987	9	6	pos11	ssd1_isw1	1	3	3	57	6.3	6.3.3	ISW1/isw1- SSD1/ssd1- 3n.Chr12	isw1	diploid
4988	9	6	pos12	isw1	0	4	3	364	6.3	6.3.4	ISW1/isw1- SSD1/ssd1- 3n.Chr12	isw1	diploid
4989	9	6	pos13	WT	0	1	4	428	6.4	6.4.1	ISW1/isw1- SSD1/ssd1- 3n.Chr12	isw1	diploid
4990	9	6	pos14	ssd1	1	2	4	75	6.4	6.4.2	ISW1/isw1- SSD1/ssd1- 3n.Chr12	isw1	diploid
4991	9	6	pos15	ssd1_isw1	0	3	4	331	6.4	6.4.3	ISW1/isw1- SSD1/ssd1- 3n.Chr12	isw1	diploid
4992	9	6	pos16	isw1	1	4	4	315	6.4	6.4.4	ISW1/isw1- SSD1/ssd1- 3n.Chr12	isw1	diploid
4993	9	6	pos17	WT	0	1	5	440	6.5	6.5.1	ISW1/isw1- SSD1/ssd1- 3n.Chr12	isw1	diploid
4994	9	6	pos18	ssd1	1	2	5	61	6.5	6.5.2	ISW1/isw1- SSD1/ssd1- 3n.Chr12	isw1	diploid
4995	9	6	pos19	isw1	0	3	5	385	6.5	6.5.3	ISW1/isw1- SSD1/ssd1- 3n.Chr12	isw1	diploid
4996	9	6	pos20	ssd1_isw1	1	4	5	59	6.5	6.5.4	ISW1/isw1- SSD1/ssd1- 3n.Chr12	isw1	diploid
4997	9	6	pos21	ssd1_isw1	1	1	6	82	6.6	6.6.1	ISW1/isw1- SSD1/ssd1- 3n.Chr12	isw1	diploid
4998	9	6	pos22	WT	1	2	6	349	6.6	6.6.2	ISW1/isw1- SSD1/ssd1- 3n.Chr12	isw1	diploid
4999	9	6	pos23	isw1	0	3	6	379	6.6	6.6.3	ISW1/isw1- SSD1/ssd1- 3n.Chr12	isw1	diploid
5000	9	6	pos24	ssd1	0	4	6	456	6.6	6.6.4	ISW1/isw1- SSD1/ssd1- 3n.Chr12	isw1	diploid
5005	9	6	pos29	isw1	1	1	8	283	6.8	6.8.1	ISW1/isw1- SSD1/ssd1- 3n.Chr12	isw1	diploid
5006	9	6	pos30	ssd1	0	2	8	407	6.8	6.8.2	ISW1/isw1- SSD1/ssd1- 3n.Chr12	isw1	diploid
5007	9	6	pos31	ssd1_isw1	0	3	8	306	6.8	6.8.3	ISW1/isw1- SSD1/ssd1- 3n.Chr12	isw1	diploid
5008	9	6	pos32	WT	1	4	8	281	6.8	6.8.4	ISW1/isw1- SSD1/ssd1- 3n.Chr12	isw1	diploid
5181	12	1	pos1	ssd1	1	1	1	52	1.1	1.1.1	HEK2/hek2- SSD1/ssd1- 3n.Chr12	hek2	diploid
5182	12	1	pos2	hek2	0	2	1	281	1.1	1.1.2	HEK2/hek2- SSD1/ssd1- 3n.Chr12	hek2	diploid
5183	12	1	pos3	ssd1	1	3	1	46	1.1	1.1.3	HEK2/hek2- SSD1/ssd1- 3n.Chr12	hek2	diploid
5184	12	1	pos4	hek2	0	4	1	325	1.1	1.1.4	HEK2/hek2- SSD1/ssd1- 3n.Chr12	hek2	diploid
5185	12	1	pos9	WT	0	1	3	318	1.3	1.3.1	HEK2/hek2- SSD1/ssd1- 3n.Chr12	hek2	diploid
5186	12	1	pos10	ssd1_hek2	1	2	3	63	1.3	1.3.2	HEK2/hek2- SSD1/ssd1- 3n.Chr12	hek2	diploid
5187	12	1	pos11	ssd1_hek2	0	3	3	367	1.3	1.3.3	HEK2/hek2- SSD1/ssd1- 3n.Chr12	hek2	diploid
5188	12	1	pos12	WT	1	4	3	259	1.3	1.3.4	HEK2/hek2- SSD1/ssd1- 3n.Chr12	hek2	diploid
5189	12	1	pos13	WT	1	1	4	276	1.4	1.4.1	HEK2/hek2- SSD1/ssd1- 3n.Chr12	hek2	diploid
5190	12	1	pos14	hek2	0	2	4	337	1.4	1.4.2	HEK2/hek2- SSD1/ssd1- 3n.Chr12	hek2	diploid
5191	12	1	pos15	ssd1	0	3	4	371	1.4	1.4.3	HEK2/hek2- SSD1/ssd1- 3n.Chr12	hek2	diploid
5192	12	1	pos16	ssd1_hek2	1	4	4	77	1.4	1.4.4	HEK2/hek2- SSD1/ssd1- 3n.Chr12	hek2	diploid
5193	12	1	pos17	ssd1	0	1	5	387	1.5	1.5.1	HEK2/hek2- SSD1/ssd1- 3n.Chr12	hek2	diploid
5194	12	1	pos18	hek2	1	2	5	297	1.5	1.5.2	HEK2/hek2- SSD1/ssd1- 3n.Chr12	hek2	diploid
5195	12	1	pos19	hek2	1	3	5	265	1.5	1.5.3	HEK2/hek2- SSD1/ssd1- 3n.Chr12	hek2	diploid
5196	12	1	pos20	ssd1	0	4	5	382	1.5	1.5.4	HEK2/hek2- SSD1/ssd1- 3n.Chr12	hek2	diploid
5197	12	1	pos21	ssd1_hek2	1	1	6	81	1.6	1.6.1	HEK2/hek2- SSD1/ssd1- 3n.Chr12	hek2	diploid
5198	12	1	pos22	ssd1_hek2	0	2	6	386	1.6	1.6.2	HEK2/hek2- SSD1/ssd1- 3n.Chr12	hek2	diploid
5199	12	1	pos23	WT	0	3	6	294	1.6	1.6.3	HEK2/hek2- SSD1/ssd1- 3n.Chr12	hek2	diploid
5200	12	1	pos24	WT	1	4	6	272	1.6	1.6.4	HEK2/hek2- SSD1/ssd1- 3n.Chr12	hek2	diploid
5201	12	1	pos25	ssd1	1	1	7	46	1.7	1.7.1	HEK2/hek2- SSD1/ssd1- 3n.Chr12	hek2	diploid
5202	12	1	pos26	WT	0	2	7	344	1.7	1.7.2	HEK2/hek2- SSD1/ssd1- 3n.Chr12	hek2	diploid
5203	12	1	pos27	ssd1_hek2	0	3	7	338	1.7	1.7.3	HEK2/hek2- SSD1/ssd1- 3n.Chr12	hek2	diploid
5204	12	1	pos28	hek2	1	4	7	263	1.7	1.7.4	HEK2/hek2- SSD1/ssd1- 3n.Chr12	hek2	diploid
5205	12	1	pos29	hek2	1	1	8	251	1.8	1.8.1	HEK2/hek2- SSD1/ssd1- 3n.Chr12	hek2	diploid
5206	12	1	pos30	ssd1	1	2	8	84	1.8	1.8.2	HEK2/hek2- SSD1/ssd1- 3n.Chr12	hek2	diploid
5207	12	1	pos31	ssd1_hek2	0	3	8	365	1.8	1.8.3	HEK2/hek2- SSD1/ssd1- 3n.Chr12	hek2	diploid
5208	12	1	pos32	WT	0	4	8	226	1.8	1.8.4	HEK2/hek2- SSD1/ssd1- 3n.Chr12	hek2	diploid
5209	12	2	pos1	WT	1	1	1	281	2.1	2.1.1	HEK2/hek2- SSD1/ssd1- 3n.Chr12	hek2	diploid
5210	12	2	pos2	hek2	1	2	1	252	2.1	2.1.2	HEK2/hek2- SSD1/ssd1- 3n.Chr12	hek2	diploid
5211	12	2	pos3	ssd1	0	3	1	324	2.1	2.1.3	HEK2/hek2- SSD1/ssd1- 3n.Chr12	hek2	diploid
5212	12	2	pos4	ssd1_hek2	0	4	1	355	2.1	2.1.4	HEK2/hek2- SSD1/ssd1- 3n.Chr12	hek2	diploid
5213	12	2	pos5	ssd1	1	1	2	47	2.2	2.2.1	HEK2/hek2- SSD1/ssd1- 3n.Chr12	hek2	diploid
5214	12	2	pos6	hek2	0	2	2	330	2.2	2.2.2	HEK2/hek2- SSD1/ssd1- 3n.Chr12	hek2	diploid
5215	12	2	pos7	ssd1_hek2	1	3	2	79	2.2	2.2.3	HEK2/hek2- SSD1/ssd1- 3n.Chr12	hek2	diploid
5216	12	2	pos8	WT	0	4	2	299	2.2	2.2.4	HEK2/hek2- SSD1/ssd1- 3n.Chr12	hek2	diploid
5217	12	2	pos9	WT	1	1	3	274	2.3	2.3.1	HEK2/hek2- SSD1/ssd1- 3n.Chr12	hek2	diploid
5218	12	2	pos10	ssd1	0	2	3	353	2.3	2.3.2	HEK2/hek2- SSD1/ssd1- 3n.Chr12	hek2	diploid
5219	12	2	pos11	hek2	1	3	3	255	2.3	2.3.3	HEK2/hek2- SSD1/ssd1- 3n.Chr12	hek2	diploid
5220	12	2	pos12	ssd1_hek2	0	4	3	349	2.3	2.3.4	HEK2/hek2- SSD1/ssd1- 3n.Chr12	hek2	diploid
5221	12	2	pos13	ssd1_hek2	1	1	4	81	2.4	2.4.1	HEK2/hek2- SSD1/ssd1- 3n.Chr12	hek2	diploid
5222	12	2	pos14	ssd1	0	2	4	350	2.4	2.4.2	HEK2/hek2- SSD1/ssd1- 3n.Chr12	hek2	diploid
5223	12	2	pos15	hek2	1	3	4	244	2.4	2.4.3	HEK2/hek2- SSD1/ssd1- 3n.Chr12	hek2	diploid
5224	12	2	pos16	WT	0	4	4	327	2.4	2.4.4	HEK2/hek2- SSD1/ssd1- 3n.Chr12	hek2	diploid
5225	12	2	pos17	WT	0	1	5	312	2.5	2.5.1	HEK2/hek2- SSD1/ssd1- 3n.Chr12	hek2	diploid
5226	12	2	pos18	ssd1	0	2	5	333	2.5	2.5.2	HEK2/hek2- SSD1/ssd1- 3n.Chr12	hek2	diploid
5227	12	2	pos19	hek2	1	3	5	265	2.5	2.5.3	HEK2/hek2- SSD1/ssd1- 3n.Chr12	hek2	diploid
5228	12	2	pos20	ssd1_hek2	1	4	5	69	2.5	2.5.4	HEK2/hek2- SSD1/ssd1- 3n.Chr12	hek2	diploid
5233	12	2	pos25	ssd1	0	1	7	355	2.7	2.7.1	HEK2/hek2- SSD1/ssd1- 3n.Chr12	hek2	diploid
5234	12	2	pos26	hek2	1	2	7	247	2.7	2.7.2	HEK2/hek2- SSD1/ssd1- 3n.Chr12	hek2	diploid
5235	12	2	pos27	hek2	1	3	7	248	2.7	2.7.3	HEK2/hek2- SSD1/ssd1- 3n.Chr12	hek2	diploid
5236	12	2	pos28	ssd1	0	4	7	310	2.7	2.7.4	HEK2/hek2- SSD1/ssd1- 3n.Chr12	hek2	diploid
5245	12	3	pos5	hek2	1	1	2	236	3.2	3.2.1	HEK2/hek2- SSD1/ssd1- 3n.Chr12	hek2	diploid
5246	12	3	pos6	ssd1	0	2	2	347	3.2	3.2.2	HEK2/hek2- SSD1/ssd1- 3n.Chr12	hek2	diploid
5247	12	3	pos7	ssd1	0	3	2	345	3.2	3.2.3	HEK2/hek2- SSD1/ssd1- 3n.Chr12	hek2	diploid
5248	12	3	pos8	hek2	1	4	2	259	3.2	3.2.4	HEK2/hek2- SSD1/ssd1- 3n.Chr12	hek2	diploid
5249	12	3	pos9	ssd1_hek2	0	1	3	338	3.3	3.3.1	HEK2/hek2- SSD1/ssd1- 3n.Chr12	hek2	diploid
5250	12	3	pos10	hek2	0	2	3	303	3.3	3.3.2	HEK2/hek2- SSD1/ssd1- 3n.Chr12	hek2	diploid
5251	12	3	pos11	WT	1	3	3	256	3.3	3.3.3	HEK2/hek2- SSD1/ssd1- 3n.Chr12	hek2	diploid
5252	12	3	pos12	ssd1	1	4	3	56	3.3	3.3.4	HEK2/hek2- SSD1/ssd1- 3n.Chr12	hek2	diploid
5253	12	3	pos13	ssd1	1	1	4	83	3.4	3.4.1	HEK2/hek2- SSD1/ssd1- 3n.Chr12	hek2	diploid
5254	12	3	pos14	ssd1_hek2	0	2	4	363	3.4	3.4.2	HEK2/hek2- SSD1/ssd1- 3n.Chr12	hek2	diploid
5255	12	3	pos15	hek2	0	3	4	318	3.4	3.4.3	HEK2/hek2- SSD1/ssd1- 3n.Chr12	hek2	diploid
5256	12	3	pos16	WT	1	4	4	248	3.4	3.4.4	HEK2/hek2- SSD1/ssd1- 3n.Chr12	hek2	diploid
5257	12	3	pos17	hek2	1	1	5	253	3.5	3.5.1	HEK2/hek2- SSD1/ssd1- 3n.Chr12	hek2	diploid
5258	12	3	pos18	ssd1_hek2	0	2	5	341	3.5	3.5.2	HEK2/hek2- SSD1/ssd1- 3n.Chr12	hek2	diploid
5259	12	3	pos19	ssd1	0	3	5	305	3.5	3.5.3	HEK2/hek2- SSD1/ssd1- 3n.Chr12	hek2	diploid
5260	12	3	pos20	WT	1	4	5	253	3.5	3.5.4	HEK2/hek2- SSD1/ssd1- 3n.Chr12	hek2	diploid
5261	12	3	pos21	WT	0	1	6	259	3.6	3.6.1	HEK2/hek2- SSD1/ssd1- 3n.Chr12	hek2	diploid
5262	12	3	pos22	ssd1	0	2	6	305	3.6	3.6.2	HEK2/hek2- SSD1/ssd1- 3n.Chr12	hek2	diploid
5263	12	3	pos23	ssd1_hek2	1	3	6	92	3.6	3.6.3	HEK2/hek2- SSD1/ssd1- 3n.Chr12	hek2	diploid
5264	12	3	pos24	hek2	1	4	6	246	3.6	3.6.4	HEK2/hek2- SSD1/ssd1- 3n.Chr12	hek2	diploid
5265	12	3	pos25	ssd1_hek2	1	1	7	84	3.7	3.7.1	HEK2/hek2- SSD1/ssd1- 3n.Chr12	hek2	diploid
5266	12	3	pos26	WT	1	2	7	257	3.7	3.7.2	HEK2/hek2- SSD1/ssd1- 3n.Chr12	hek2	diploid
5267	12	3	pos27	ssd1_hek2	0	3	7	348	3.7	3.7.3	HEK2/hek2- SSD1/ssd1- 3n.Chr12	hek2	diploid
5268	12	3	pos28	WT	0	4	7	319	3.7	3.7.4	HEK2/hek2- SSD1/ssd1- 3n.Chr12	hek2	diploid
5269	12	3	pos29	ssd1_hek2	0	1	8	348	3.8	3.8.1	HEK2/hek2- SSD1/ssd1- 3n.Chr12	hek2	diploid
5270	12	3	pos30	WT	1	2	8	236	3.8	3.8.2	HEK2/hek2- SSD1/ssd1- 3n.Chr12	hek2	diploid
5271	12	3	pos31	ssd1	0	3	8	344	3.8	3.8.3	HEK2/hek2- SSD1/ssd1- 3n.Chr12	hek2	diploid
5272	12	3	pos32	hek2	1	4	8	246	3.8	3.8.4	HEK2/hek2- SSD1/ssd1- 3n.Chr12	hek2	diploid
5273	12	4	pos1	WT	1	1	1	247	4.1	4.1.1	HEK2/hek2- SSD1/ssd1- 3n.Chr12	hek2	diploid
5274	12	4	pos2	hek2	0	2	1	318	4.1	4.1.2	HEK2/hek2- SSD1/ssd1- 3n.Chr12	hek2	diploid
5275	12	4	pos3	ssd1	1	3	1	52	4.1	4.1.3	HEK2/hek2- SSD1/ssd1- 3n.Chr12	hek2	diploid
5276	12	4	pos4	ssd1_hek2	0	4	1	364	4.1	4.1.4	HEK2/hek2- SSD1/ssd1- 3n.Chr12	hek2	diploid
5277	12	4	pos5	ssd1_hek2	1	1	2	74	4.2	4.2.1	HEK2/hek2- SSD1/ssd1- 3n.Chr12	hek2	diploid
5278	12	4	pos6	WT	1	2	2	280	4.2	4.2.2	HEK2/hek2- SSD1/ssd1- 3n.Chr12	hek2	diploid
5279	12	4	pos7	ssd1	0	3	2	348	4.2	4.2.3	HEK2/hek2- SSD1/ssd1- 3n.Chr12	hek2	diploid
5280	12	4	pos8	hek2	0	4	2	343	4.2	4.2.4	HEK2/hek2- SSD1/ssd1- 3n.Chr12	hek2	diploid
5281	12	4	pos9	hek2	1	1	3	219	4.3	4.3.1	HEK2/hek2- SSD1/ssd1- 3n.Chr12	hek2	diploid
5282	12	4	pos10	ssd1	0	2	3	335	4.3	4.3.2	HEK2/hek2- SSD1/ssd1- 3n.Chr12	hek2	diploid
5283	12	4	pos11	ssd1_hek2	1	3	3	79	4.3	4.3.3	HEK2/hek2- SSD1/ssd1- 3n.Chr12	hek2	diploid
5284	12	4	pos12	WT	0	4	3	307	4.3	4.3.4	HEK2/hek2- SSD1/ssd1- 3n.Chr12	hek2	diploid
5285	12	4	pos13	ssd1	0	1	4	355	4.4	4.4.1	HEK2/hek2- SSD1/ssd1- 3n.Chr12	hek2	diploid
5286	12	4	pos14	WT	1	2	4	283	4.4	4.4.2	HEK2/hek2- SSD1/ssd1- 3n.Chr12	hek2	diploid
5287	12	4	pos15	ssd1_hek2	1	3	4	100	4.4	4.4.3	HEK2/hek2- SSD1/ssd1- 3n.Chr12	hek2	diploid
5288	12	4	pos16	hek2	0	4	4	337	4.4	4.4.4	HEK2/hek2- SSD1/ssd1- 3n.Chr12	hek2	diploid
5289	12	4	pos17	ssd1_hek2	0	1	5	359	4.5	4.5.1	HEK2/hek2- SSD1/ssd1- 3n.Chr12	hek2	diploid
5290	12	4	pos18	WT	1	2	5	252	4.5	4.5.2	HEK2/hek2- SSD1/ssd1- 3n.Chr12	hek2	diploid
5291	12	4	pos19	ssd1_hek2	1	3	5	95	4.5	4.5.3	HEK2/hek2- SSD1/ssd1- 3n.Chr12	hek2	diploid
5292	12	4	pos20	WT	0	4	5	331	4.5	4.5.4	HEK2/hek2- SSD1/ssd1- 3n.Chr12	hek2	diploid
5293	12	4	pos21	ssd1_hek2	0	1	6	331	4.6	4.6.1	HEK2/hek2- SSD1/ssd1- 3n.Chr12	hek2	diploid
5294	12	4	pos22	WT	1	2	6	188	4.6	4.6.2	HEK2/hek2- SSD1/ssd1- 3n.Chr12	hek2	diploid
5295	12	4	pos23	ssd1_hek2	0	3	6	298	4.6	4.6.3	HEK2/hek2- SSD1/ssd1- 3n.Chr12	hek2	diploid
5296	12	4	pos24	WT	1	4	6	251	4.6	4.6.4	HEK2/hek2- SSD1/ssd1- 3n.Chr12	hek2	diploid
5297	12	4	pos25	ssd1_hek2	1	1	7	87	4.7	4.7.1	HEK2/hek2- SSD1/ssd1- 3n.Chr12	hek2	diploid
5298	12	4	pos26	WT	1	2	7	260	4.7	4.7.2	HEK2/hek2- SSD1/ssd1- 3n.Chr12	hek2	diploid
5299	12	4	pos27	WT	0	3	7	305	4.7	4.7.3	HEK2/hek2- SSD1/ssd1- 3n.Chr12	hek2	diploid
5300	12	4	pos28	ssd1_hek2	0	4	7	381	4.7	4.7.4	HEK2/hek2- SSD1/ssd1- 3n.Chr12	hek2	diploid
5301	12	4	pos29	ssd1	0	1	8	283	4.8	4.8.1	HEK2/hek2- SSD1/ssd1- 3n.Chr12	hek2	diploid
5302	12	4	pos30	hek2	0	2	8	324	4.8	4.8.2	HEK2/hek2- SSD1/ssd1- 3n.Chr12	hek2	diploid
5303	12	4	pos31	WT	1	3	8	231	4.8	4.8.3	HEK2/hek2- SSD1/ssd1- 3n.Chr12	hek2	diploid
5304	12	4	pos32	ssd1_hek2	1	4	8	76	4.8	4.8.4	HEK2/hek2- SSD1/ssd1- 3n.Chr12	hek2	diploid
5305	12	5	pos1	ssd1_hek2	0	1	1	351	5.1	5.1.1	HEK2/hek2- SSD1/ssd1- 3n.Chr12	hek2	diploid
5306	12	5	pos2	ssd1	0	2	1	352	5.1	5.1.2	HEK2/hek2- SSD1/ssd1- 3n.Chr12	hek2	diploid
5307	12	5	pos3	WT	1	3	1	248	5.1	5.1.3	HEK2/hek2- SSD1/ssd1- 3n.Chr12	hek2	diploid
5308	12	5	pos4	hek2	1	4	1	254	5.1	5.1.4	HEK2/hek2- SSD1/ssd1- 3n.Chr12	hek2	diploid
5309	12	5	pos5	ssd1_hek2	1	1	2	86	5.2	5.2.1	HEK2/hek2- SSD1/ssd1- 3n.Chr12	hek2	diploid
5310	12	5	pos6	ssd1	1	2	2	141	5.2	5.2.2	HEK2/hek2- SSD1/ssd1- 3n.Chr12	hek2	diploid
5311	12	5	pos7	hek2	0	3	2	346	5.2	5.2.3	HEK2/hek2- SSD1/ssd1- 3n.Chr12	hek2	diploid
5312	12	5	pos8	WT	0	4	2	342	5.2	5.2.4	HEK2/hek2- SSD1/ssd1- 3n.Chr12	hek2	diploid
5313	12	5	pos9	ssd1_hek2	0	1	3	288	5.3	5.3.1	HEK2/hek2- SSD1/ssd1- 3n.Chr12	hek2	diploid
5314	12	5	pos10	WT	0	2	3	294	5.3	5.3.2	HEK2/hek2- SSD1/ssd1- 3n.Chr12	hek2	diploid
5315	12	5	pos11	hek2	1	3	3	263	5.3	5.3.3	HEK2/hek2- SSD1/ssd1- 3n.Chr12	hek2	diploid
5316	12	5	pos12	ssd1	1	4	3	80	5.3	5.3.4	HEK2/hek2- SSD1/ssd1- 3n.Chr12	hek2	diploid
5317	12	5	pos13	ssd1	1	1	4	56	5.4	5.4.1	HEK2/hek2- SSD1/ssd1- 3n.Chr12	hek2	diploid
5318	12	5	pos14	WT	1	2	4	258	5.4	5.4.2	HEK2/hek2- SSD1/ssd1- 3n.Chr12	hek2	diploid
5319	12	5	pos15	ssd1_hek2	0	3	4	347	5.4	5.4.3	HEK2/hek2- SSD1/ssd1- 3n.Chr12	hek2	diploid
5320	12	5	pos16	hek2	0	4	4	320	5.4	5.4.4	HEK2/hek2- SSD1/ssd1- 3n.Chr12	hek2	diploid
5321	12	5	pos17	ssd1	1	1	5	56	5.5	5.5.1	HEK2/hek2- SSD1/ssd1- 3n.Chr12	hek2	diploid
5322	12	5	pos18	ssd1_hek2	0	2	5	359	5.5	5.5.2	HEK2/hek2- SSD1/ssd1- 3n.Chr12	hek2	diploid
5323	12	5	pos19	WT	1	3	5	241	5.5	5.5.3	HEK2/hek2- SSD1/ssd1- 3n.Chr12	hek2	diploid
5324	12	5	pos20	hek2	0	4	5	280	5.5	5.5.4	HEK2/hek2- SSD1/ssd1- 3n.Chr12	hek2	diploid
5325	12	5	pos21	WT	1	1	6	263	5.6	5.6.1	HEK2/hek2- SSD1/ssd1- 3n.Chr12	hek2	diploid
5326	12	5	pos22	ssd1	0	2	6	341	5.6	5.6.2	HEK2/hek2- SSD1/ssd1- 3n.Chr12	hek2	diploid
5327	12	5	pos23	hek2	1	3	6	256	5.6	5.6.3	HEK2/hek2- SSD1/ssd1- 3n.Chr12	hek2	diploid
5328	12	5	pos24	ssd1_hek2	0	4	6	342	5.6	5.6.4	HEK2/hek2- SSD1/ssd1- 3n.Chr12	hek2	diploid
5329	12	5	pos25	WT	0	1	7	318	5.7	5.7.1	HEK2/hek2- SSD1/ssd1- 3n.Chr12	hek2	diploid
5330	12	5	pos26	WT	1	2	7	270	5.7	5.7.2	HEK2/hek2- SSD1/ssd1- 3n.Chr12	hek2	diploid
5331	12	5	pos27	ssd1_hek2	1	3	7	98	5.7	5.7.3	HEK2/hek2- SSD1/ssd1- 3n.Chr12	hek2	diploid
5332	12	5	pos28	ssd1_hek2	0	4	7	368	5.7	5.7.4	HEK2/hek2- SSD1/ssd1- 3n.Chr12	hek2	diploid
5337	12	6	pos1	ssd1_hek2	1	1	1	70	6.1	6.1.1	HEK2/hek2- SSD1/ssd1- 3n.Chr12	hek2	diploid
5338	12	6	pos2	ssd1	0	2	1	364	6.1	6.1.2	HEK2/hek2- SSD1/ssd1- 3n.Chr12	hek2	diploid
5339	12	6	pos3	hek2	1	3	1	245	6.1	6.1.3	HEK2/hek2- SSD1/ssd1- 3n.Chr12	hek2	diploid
5340	12	6	pos4	WT	0	4	1	329	6.1	6.1.4	HEK2/hek2- SSD1/ssd1- 3n.Chr12	hek2	diploid
5341	12	6	pos5	ssd1	1	1	2	52	6.2	6.2.1	HEK2/hek2- SSD1/ssd1- 3n.Chr12	hek2	diploid
5342	12	6	pos6	WT	0	2	2	344	6.2	6.2.2	HEK2/hek2- SSD1/ssd1- 3n.Chr12	hek2	diploid
5343	12	6	pos7	ssd1_hek2	1	3	2	84	6.2	6.2.3	HEK2/hek2- SSD1/ssd1- 3n.Chr12	hek2	diploid
5344	12	6	pos8	hek2	0	4	2	336	6.2	6.2.4	HEK2/hek2- SSD1/ssd1- 3n.Chr12	hek2	diploid
5345	12	6	pos9	hek2	0	1	3	308	6.3	6.3.1	HEK2/hek2- SSD1/ssd1- 3n.Chr12	hek2	diploid
5346	12	6	pos10	ssd1	1	2	3	78	6.3	6.3.2	HEK2/hek2- SSD1/ssd1- 3n.Chr12	hek2	diploid
5347	12	6	pos11	ssd1_hek2	0	3	3	359	6.3	6.3.3	HEK2/hek2- SSD1/ssd1- 3n.Chr12	hek2	diploid
5348	12	6	pos12	WT	1	4	3	267	6.3	6.3.4	HEK2/hek2- SSD1/ssd1- 3n.Chr12	hek2	diploid
5349	12	6	pos13	hek2	0	1	4	307	6.4	6.4.1	HEK2/hek2- SSD1/ssd1- 3n.Chr12	hek2	diploid
5350	12	6	pos14	ssd1	1	2	4	73	6.4	6.4.2	HEK2/hek2- SSD1/ssd1- 3n.Chr12	hek2	diploid
5351	12	6	pos15	WT	1	3	4	289	6.4	6.4.3	HEK2/hek2- SSD1/ssd1- 3n.Chr12	hek2	diploid
5352	12	6	pos16	ssd1_hek2	0	4	4	403	6.4	6.4.4	HEK2/hek2- SSD1/ssd1- 3n.Chr12	hek2	diploid
5357	12	6	pos21	ssd1	1	1	6	46	6.6	6.6.1	HEK2/hek2- SSD1/ssd1- 3n.Chr12	hek2	diploid
5358	12	6	pos22	ssd1_hek2	0	2	6	345	6.6	6.6.2	HEK2/hek2- SSD1/ssd1- 3n.Chr12	hek2	diploid
5359	12	6	pos23	hek2	0	3	6	314	6.6	6.6.3	HEK2/hek2- SSD1/ssd1- 3n.Chr12	hek2	diploid
5360	12	6	pos24	WT	1	4	6	244	6.6	6.6.4	HEK2/hek2- SSD1/ssd1- 3n.Chr12	hek2	diploid
5361	12	6	pos25	WT	1	1	7	277	6.7	6.7.1	HEK2/hek2- SSD1/ssd1- 3n.Chr12	hek2	diploid
5362	12	6	pos26	hek2	1	2	7	262	6.7	6.7.2	HEK2/hek2- SSD1/ssd1- 3n.Chr12	hek2	diploid
5363	12	6	pos27	ssd1	0	3	7	336	6.7	6.7.3	HEK2/hek2- SSD1/ssd1- 3n.Chr12	hek2	diploid
5364	12	6	pos28	ssd1_hek2	0	4	7	336	6.7	6.7.4	HEK2/hek2- SSD1/ssd1- 3n.Chr12	hek2	diploid
5553	13	1	pos1	ssd1	0	1	1	347	1.1	1.1.1	CCR4/ccr4- SSD1/ssd1- 3n.Chr12	ccr4	diploid
5554	13	1	pos2	ccr4	1	2	1	170	1.1	1.1.2	CCR4/ccr4- SSD1/ssd1- 3n.Chr12	ccr4	diploid
5555	13	1	pos3	ssd1	0	3	1	389	1.1	1.1.3	CCR4/ccr4- SSD1/ssd1- 3n.Chr12	ccr4	diploid
5556	13	1	pos4	ccr4	1	4	1	158	1.1	1.1.4	CCR4/ccr4- SSD1/ssd1- 3n.Chr12	ccr4	diploid
5557	13	1	pos5	ssd1_ccr4	1	1	2	68	1.2	1.2.1	CCR4/ccr4- SSD1/ssd1- 3n.Chr12	ccr4	diploid
5558	13	1	pos6	WT	0	2	2	341	1.2	1.2.2	CCR4/ccr4- SSD1/ssd1- 3n.Chr12	ccr4	diploid
5559	13	1	pos7	WT	0	3	2	356	1.2	1.2.3	CCR4/ccr4- SSD1/ssd1- 3n.Chr12	ccr4	diploid
5560	13	1	pos8	ssd1_ccr4	1	4	2	83	1.2	1.2.4	CCR4/ccr4- SSD1/ssd1- 3n.Chr12	ccr4	diploid
5561	13	1	pos9	ssd1	0	1	3	359	1.3	1.3.1	CCR4/ccr4- SSD1/ssd1- 3n.Chr12	ccr4	diploid
5562	13	1	pos10	ccr4	1	2	3	127	1.3	1.3.2	CCR4/ccr4- SSD1/ssd1- 3n.Chr12	ccr4	diploid
5563	13	1	pos11	ssd1	1	3	3	72	1.3	1.3.3	CCR4/ccr4- SSD1/ssd1- 3n.Chr12	ccr4	diploid
5564	13	1	pos12	ccr4	0	4	3	203	1.3	1.3.4	CCR4/ccr4- SSD1/ssd1- 3n.Chr12	ccr4	diploid
5565	13	1	pos13	ssd1_ccr4	1	1	4	75	1.4	1.4.1	CCR4/ccr4- SSD1/ssd1- 3n.Chr12	ccr4	diploid
5566	13	1	pos14	ssd1	0	2	4	376	1.4	1.4.2	CCR4/ccr4- SSD1/ssd1- 3n.Chr12	ccr4	diploid
5567	13	1	pos15	ccr4	1	3	4	155	1.4	1.4.3	CCR4/ccr4- SSD1/ssd1- 3n.Chr12	ccr4	diploid
5568	13	1	pos16	WT	0	4	4	384	1.4	1.4.4	CCR4/ccr4- SSD1/ssd1- 3n.Chr12	ccr4	diploid
5569	13	1	pos17	ssd1_ccr4	0	1	5	228	1.5	1.5.1	CCR4/ccr4- SSD1/ssd1- 3n.Chr12	ccr4	diploid
5570	13	1	pos18	ssd1	1	2	5	81	1.5	1.5.2	CCR4/ccr4- SSD1/ssd1- 3n.Chr12	ccr4	diploid
5571	13	1	pos19	WT	1	3	5	332	1.5	1.5.3	CCR4/ccr4- SSD1/ssd1- 3n.Chr12	ccr4	diploid
5572	13	1	pos20	ccr4	0	4	5	128	1.5	1.5.4	CCR4/ccr4- SSD1/ssd1- 3n.Chr12	ccr4	diploid
5573	13	1	pos21	ssd1_ccr4	1	1	6	28	1.6	1.6.1	CCR4/ccr4- SSD1/ssd1- 3n.Chr12	ccr4	diploid
5574	13	1	pos22	ccr4	1	2	6	169	1.6	1.6.2	CCR4/ccr4- SSD1/ssd1- 3n.Chr12	ccr4	diploid
5575	13	1	pos23	ssd1	0	3	6	353	1.6	1.6.3	CCR4/ccr4- SSD1/ssd1- 3n.Chr12	ccr4	diploid
5576	13	1	pos24	WT	0	4	6	361	1.6	1.6.4	CCR4/ccr4- SSD1/ssd1- 3n.Chr12	ccr4	diploid
5577	13	1	pos25	ssd1	0	1	7	389	1.7	1.7.1	CCR4/ccr4- SSD1/ssd1- 3n.Chr12	ccr4	diploid
5578	13	1	pos26	ssd1	0	2	7	439	1.7	1.7.2	CCR4/ccr4- SSD1/ssd1- 3n.Chr12	ccr4	diploid
5579	13	1	pos27	ccr4	1	3	7	168	1.7	1.7.3	CCR4/ccr4- SSD1/ssd1- 3n.Chr12	ccr4	diploid
5580	13	1	pos28	ccr4	1	4	7	186	1.7	1.7.4	CCR4/ccr4- SSD1/ssd1- 3n.Chr12	ccr4	diploid
5581	13	1	pos29	WT	1	1	8	245	1.8	1.8.1	CCR4/ccr4- SSD1/ssd1- 3n.Chr12	ccr4	diploid
5582	13	1	pos30	ccr4	0	2	8	188	1.8	1.8.2	CCR4/ccr4- SSD1/ssd1- 3n.Chr12	ccr4	diploid
5583	13	1	pos31	ssd1	1	3	8	101	1.8	1.8.3	CCR4/ccr4- SSD1/ssd1- 3n.Chr12	ccr4	diploid
5584	13	1	pos32	ssd1_ccr4	0	4	8	224	1.8	1.8.4	CCR4/ccr4- SSD1/ssd1- 3n.Chr12	ccr4	diploid
5589	13	2	pos5	ssd1_ccr4	0	1	2	188	2.2	2.2.1	CCR4/ccr4- SSD1/ssd1- 3n.Chr12	ccr4	diploid
5590	13	2	pos6	ccr4	1	2	2	169	2.2	2.2.2	CCR4/ccr4- SSD1/ssd1- 3n.Chr12	ccr4	diploid
5591	13	2	pos7	WT	0	3	2	352	2.2	2.2.3	CCR4/ccr4- SSD1/ssd1- 3n.Chr12	ccr4	diploid
5592	13	2	pos8	ssd1	1	4	2	82	2.2	2.2.4	CCR4/ccr4- SSD1/ssd1- 3n.Chr12	ccr4	diploid
5593	13	2	pos9	ccr4	1	1	3	159	2.3	2.3.1	CCR4/ccr4- SSD1/ssd1- 3n.Chr12	ccr4	diploid
5594	13	2	pos10	ssd1_ccr4	1	2	3	55	2.3	2.3.2	CCR4/ccr4- SSD1/ssd1- 3n.Chr12	ccr4	diploid
5595	13	2	pos11	WT	0	3	3	338	2.3	2.3.3	CCR4/ccr4- SSD1/ssd1- 3n.Chr12	ccr4	diploid
5596	13	2	pos12	ssd1	0	4	3	405	2.3	2.3.4	CCR4/ccr4- SSD1/ssd1- 3n.Chr12	ccr4	diploid
5597	13	2	pos13	WT	0	1	4	385	2.4	2.4.1	CCR4/ccr4- SSD1/ssd1- 3n.Chr12	ccr4	diploid
5598	13	2	pos14	ccr4	1	2	4	101	2.4	2.4.2	CCR4/ccr4- SSD1/ssd1- 3n.Chr12	ccr4	diploid
5599	13	2	pos15	ssd1_ccr4	1	3	4	68	2.4	2.4.3	CCR4/ccr4- SSD1/ssd1- 3n.Chr12	ccr4	diploid
5600	13	2	pos16	ssd1	0	4	4	362	2.4	2.4.4	CCR4/ccr4- SSD1/ssd1- 3n.Chr12	ccr4	diploid
5601	13	2	pos17	ssd1	1	1	5	77	2.5	2.5.1	CCR4/ccr4- SSD1/ssd1- 3n.Chr12	ccr4	diploid
5602	13	2	pos18	ccr4	1	2	5	145	2.5	2.5.2	CCR4/ccr4- SSD1/ssd1- 3n.Chr12	ccr4	diploid
5603	13	2	pos19	ssd1	0	3	5	346	2.5	2.5.3	CCR4/ccr4- SSD1/ssd1- 3n.Chr12	ccr4	diploid
5604	13	2	pos20	ccr4	0	4	5	200	2.5	2.5.4	CCR4/ccr4- SSD1/ssd1- 3n.Chr12	ccr4	diploid
5609	13	2	pos25	ssd1	0	1	7	365	2.7	2.7.1	CCR4/ccr4- SSD1/ssd1- 3n.Chr12	ccr4	diploid
5610	13	2	pos26	ssd1_ccr4	1	2	7	59	2.7	2.7.2	CCR4/ccr4- SSD1/ssd1- 3n.Chr12	ccr4	diploid
5611	13	2	pos27	WT	0	3	7	383	2.7	2.7.3	CCR4/ccr4- SSD1/ssd1- 3n.Chr12	ccr4	diploid
5612	13	2	pos28	ccr4	1	4	7	171	2.7	2.7.4	CCR4/ccr4- SSD1/ssd1- 3n.Chr12	ccr4	diploid
5613	13	2	pos29	WT	1	1	8	309	2.8	2.8.1	CCR4/ccr4- SSD1/ssd1- 3n.Chr12	ccr4	diploid
5614	13	2	pos30	ssd1	0	2	8	430	2.8	2.8.2	CCR4/ccr4- SSD1/ssd1- 3n.Chr12	ccr4	diploid
5615	13	2	pos31	ssd1_ccr4	1	3	8	89	2.8	2.8.3	CCR4/ccr4- SSD1/ssd1- 3n.Chr12	ccr4	diploid
5616	13	2	pos32	ccr4	0	4	8	217	2.8	2.8.4	CCR4/ccr4- SSD1/ssd1- 3n.Chr12	ccr4	diploid
5617	13	3	pos1	WT	1	1	1	311	3.1	3.1.1	CCR4/ccr4- SSD1/ssd1- 3n.Chr12	ccr4	diploid
5618	13	3	pos2	ssd1_ccr4	0	2	1	204	3.1	3.1.2	CCR4/ccr4- SSD1/ssd1- 3n.Chr12	ccr4	diploid
5619	13	3	pos3	WT	1	3	1	315	3.1	3.1.3	CCR4/ccr4- SSD1/ssd1- 3n.Chr12	ccr4	diploid
5620	13	3	pos4	ssd1_ccr4	0	4	1	177	3.1	3.1.4	CCR4/ccr4- SSD1/ssd1- 3n.Chr12	ccr4	diploid
5621	13	3	pos5	ssd1_ccr4	1	1	2	63	3.2	3.2.1	CCR4/ccr4- SSD1/ssd1- 3n.Chr12	ccr4	diploid
5622	13	3	pos6	WT	0	2	2	353	3.2	3.2.2	CCR4/ccr4- SSD1/ssd1- 3n.Chr12	ccr4	diploid
5623	13	3	pos7	ssd1_ccr4	1	3	2	76	3.2	3.2.3	CCR4/ccr4- SSD1/ssd1- 3n.Chr12	ccr4	diploid
5624	13	3	pos8	WT	0	4	2	355	3.2	3.2.4	CCR4/ccr4- SSD1/ssd1- 3n.Chr12	ccr4	diploid
5625	13	3	pos9	WT	1	1	3	332	3.3	3.3.1	CCR4/ccr4- SSD1/ssd1- 3n.Chr12	ccr4	diploid
5626	13	3	pos10	ssd1_ccr4	1	2	3	66	3.3	3.3.2	CCR4/ccr4- SSD1/ssd1- 3n.Chr12	ccr4	diploid
5627	13	3	pos11	ssd1_ccr4	0	3	3	214	3.3	3.3.3	CCR4/ccr4- SSD1/ssd1- 3n.Chr12	ccr4	diploid
5628	13	3	pos12	WT	0	4	3	380	3.3	3.3.4	CCR4/ccr4- SSD1/ssd1- 3n.Chr12	ccr4	diploid
5629	13	3	pos13	ccr4	0	1	4	203	3.4	3.4.1	CCR4/ccr4- SSD1/ssd1- 3n.Chr12	ccr4	diploid
5630	13	3	pos14	ssd1_ccr4	0	2	4	230	3.4	3.4.2	CCR4/ccr4- SSD1/ssd1- 3n.Chr12	ccr4	diploid
5631	13	3	pos15	ssd1	1	3	4	93	3.4	3.4.3	CCR4/ccr4- SSD1/ssd1- 3n.Chr12	ccr4	diploid
5632	13	3	pos16	WT	1	4	4	289	3.4	3.4.4	CCR4/ccr4- SSD1/ssd1- 3n.Chr12	ccr4	diploid
5633	13	3	pos17	ccr4	1	1	5	182	3.5	3.5.1	CCR4/ccr4- SSD1/ssd1- 3n.Chr12	ccr4	diploid
5634	13	3	pos18	ssd1_ccr4	1	2	5	107	3.5	3.5.2	CCR4/ccr4- SSD1/ssd1- 3n.Chr12	ccr4	diploid
5635	13	3	pos19	ssd1	0	3	5	407	3.5	3.5.3	CCR4/ccr4- SSD1/ssd1- 3n.Chr12	ccr4	diploid
5636	13	3	pos20	WT	0	4	5	348	3.5	3.5.4	CCR4/ccr4- SSD1/ssd1- 3n.Chr12	ccr4	diploid
5641	13	3	pos25	ssd1_ccr4	0	1	7	217	3.7	3.7.1	CCR4/ccr4- SSD1/ssd1- 3n.Chr12	ccr4	diploid
5642	13	3	pos26	WT	1	2	7	334	3.7	3.7.2	CCR4/ccr4- SSD1/ssd1- 3n.Chr12	ccr4	diploid
5643	13	3	pos27	ccr4	0	3	7	206	3.7	3.7.3	CCR4/ccr4- SSD1/ssd1- 3n.Chr12	ccr4	diploid
5644	13	3	pos28	ssd1	1	4	7	67	3.7	3.7.4	CCR4/ccr4- SSD1/ssd1- 3n.Chr12	ccr4	diploid
5645	13	3	pos29	ssd1	1	1	8	60	3.8	3.8.1	CCR4/ccr4- SSD1/ssd1- 3n.Chr12	ccr4	diploid
5646	13	3	pos30	ccr4	1	2	8	197	3.8	3.8.2	CCR4/ccr4- SSD1/ssd1- 3n.Chr12	ccr4	diploid
5647	13	3	pos31	ssd1_ccr4	0	3	8	226	3.8	3.8.3	CCR4/ccr4- SSD1/ssd1- 3n.Chr12	ccr4	diploid
5648	13	3	pos32	WT	0	4	8	361	3.8	3.8.4	CCR4/ccr4- SSD1/ssd1- 3n.Chr12	ccr4	diploid
5649	13	4	pos1	ssd1_ccr4	0	1	1	179	4.1	4.1.1	CCR4/ccr4- SSD1/ssd1- 3n.Chr12	ccr4	diploid
5650	13	4	pos2	ssd1	1	2	1	90	4.1	4.1.2	CCR4/ccr4- SSD1/ssd1- 3n.Chr12	ccr4	diploid
5651	13	4	pos3	ccr4	0	3	1	196	4.1	4.1.3	CCR4/ccr4- SSD1/ssd1- 3n.Chr12	ccr4	diploid
5652	13	4	pos4	WT	1	4	1	310	4.1	4.1.4	CCR4/ccr4- SSD1/ssd1- 3n.Chr12	ccr4	diploid
5653	13	4	pos5	ssd1	0	1	2	436	4.2	4.2.1	CCR4/ccr4- SSD1/ssd1- 3n.Chr12	ccr4	diploid
5654	13	4	pos6	ccr4	0	2	2	1	4.2	4.2.2	CCR4/ccr4- SSD1/ssd1- 3n.Chr12	ccr4	diploid
5655	13	4	pos7	ccr4	1	3	2	168	4.2	4.2.3	CCR4/ccr4- SSD1/ssd1- 3n.Chr12	ccr4	diploid
5656	13	4	pos8	ssd1	1	4	2	70	4.2	4.2.4	CCR4/ccr4- SSD1/ssd1- 3n.Chr12	ccr4	diploid
5662	13	4	pos14	ccr4	0	2	4	115	4.4	4.4.2	CCR4/ccr4- SSD1/ssd1- 3n.Chr12	ccr4	diploid
5664	13	4	pos16	WT	1	4	4	314	4.4	4.4.4	CCR4/ccr4- SSD1/ssd1- 3n.Chr12	ccr4	diploid
5665	13	4	pos17	ssd1_ccr4	0	1	5	224	4.5	4.5.1	CCR4/ccr4- SSD1/ssd1- 3n.Chr12	ccr4	diploid
5666	13	4	pos18	ssd1_ccr4	1	2	5	86	4.5	4.5.2	CCR4/ccr4- SSD1/ssd1- 3n.Chr12	ccr4	diploid
5667	13	4	pos19	WT	1	3	5	293	4.5	4.5.3	CCR4/ccr4- SSD1/ssd1- 3n.Chr12	ccr4	diploid
5668	13	4	pos20	WT	0	4	5	377	4.5	4.5.4	CCR4/ccr4- SSD1/ssd1- 3n.Chr12	ccr4	diploid
5673	13	4	pos25	ccr4	0	1	7	215	4.7	4.7.1	CCR4/ccr4- SSD1/ssd1- 3n.Chr12	ccr4	diploid
5674	13	4	pos26	ssd1	1	2	7	58	4.7	4.7.2	CCR4/ccr4- SSD1/ssd1- 3n.Chr12	ccr4	diploid
5675	13	4	pos27	ssd1_ccr4	1	3	7	33	4.7	4.7.3	CCR4/ccr4- SSD1/ssd1- 3n.Chr12	ccr4	diploid
5676	13	4	pos28	WT	0	4	7	431	4.7	4.7.4	CCR4/ccr4- SSD1/ssd1- 3n.Chr12	ccr4	diploid
5681	13	5	pos1	ccr4	1	1	1	180	5.1	5.1.1	CCR4/ccr4- SSD1/ssd1- 3n.Chr12	ccr4	diploid
5682	13	5	pos2	ssd1	0	2	1	414	5.1	5.1.2	CCR4/ccr4- SSD1/ssd1- 3n.Chr12	ccr4	diploid
5683	13	5	pos3	WT	1	3	1	317	5.1	5.1.3	CCR4/ccr4- SSD1/ssd1- 3n.Chr12	ccr4	diploid
5684	13	5	pos4	ssd1_ccr4	0	4	1	188	5.1	5.1.4	CCR4/ccr4- SSD1/ssd1- 3n.Chr12	ccr4	diploid
5685	13	5	pos5	ssd1_ccr4	0	1	2	140	5.2	5.2.1	CCR4/ccr4- SSD1/ssd1- 3n.Chr12	ccr4	diploid
5686	13	5	pos6	WT	1	2	2	309	5.2	5.2.2	CCR4/ccr4- SSD1/ssd1- 3n.Chr12	ccr4	diploid
5687	13	5	pos7	ssd1_ccr4	0	3	2	183	5.2	5.2.3	CCR4/ccr4- SSD1/ssd1- 3n.Chr12	ccr4	diploid
5688	13	5	pos8	WT	1	4	2	287	5.2	5.2.4	CCR4/ccr4- SSD1/ssd1- 3n.Chr12	ccr4	diploid
5689	13	5	pos9	ccr4	1	1	3	117	5.3	5.3.1	CCR4/ccr4- SSD1/ssd1- 3n.Chr12	ccr4	diploid
5690	13	5	pos10	ssd1_ccr4	1	2	3	59	5.3	5.3.2	CCR4/ccr4- SSD1/ssd1- 3n.Chr12	ccr4	diploid
5691	13	5	pos11	ssd1	0	3	3	413	5.3	5.3.3	CCR4/ccr4- SSD1/ssd1- 3n.Chr12	ccr4	diploid
5692	13	5	pos12	WT	0	4	3	345	5.3	5.3.4	CCR4/ccr4- SSD1/ssd1- 3n.Chr12	ccr4	diploid
5693	13	5	pos13	ssd1	1	1	4	61	5.4	5.4.1	CCR4/ccr4- SSD1/ssd1- 3n.Chr12	ccr4	diploid
5694	13	5	pos14	ssd1	0	2	4	375	5.4	5.4.2	CCR4/ccr4- SSD1/ssd1- 3n.Chr12	ccr4	diploid
5695	13	5	pos15	ccr4	0	3	4	199	5.4	5.4.3	CCR4/ccr4- SSD1/ssd1- 3n.Chr12	ccr4	diploid
5696	13	5	pos16	ccr4	1	4	4	156	5.4	5.4.4	CCR4/ccr4- SSD1/ssd1- 3n.Chr12	ccr4	diploid
5697	13	5	pos17	ccr4	1	1	5	166	5.5	5.5.1	CCR4/ccr4- SSD1/ssd1- 3n.Chr12	ccr4	diploid
5698	13	5	pos18	WT	0	2	5	410	5.5	5.5.2	CCR4/ccr4- SSD1/ssd1- 3n.Chr12	ccr4	diploid
5699	13	5	pos19	ssd1	1	3	5	96	5.5	5.5.3	CCR4/ccr4- SSD1/ssd1- 3n.Chr12	ccr4	diploid
5700	13	5	pos20	ssd1_ccr4	0	4	5	224	5.5	5.5.4	CCR4/ccr4- SSD1/ssd1- 3n.Chr12	ccr4	diploid
5705	13	5	pos25	ssd1	1	1	7	100	5.7	5.7.1	CCR4/ccr4- SSD1/ssd1- 3n.Chr12	ccr4	diploid
5706	13	5	pos26	WT	0	2	7	382	5.7	5.7.2	CCR4/ccr4- SSD1/ssd1- 3n.Chr12	ccr4	diploid
5707	13	5	pos27	ssd1_ccr4	1	3	7	72	5.7	5.7.3	CCR4/ccr4- SSD1/ssd1- 3n.Chr12	ccr4	diploid
5708	13	5	pos28	ccr4	0	4	7	206	5.7	5.7.4	CCR4/ccr4- SSD1/ssd1- 3n.Chr12	ccr4	diploid
5709	13	5	pos29	ssd1_ccr4	1	1	8	80	5.8	5.8.1	CCR4/ccr4- SSD1/ssd1- 3n.Chr12	ccr4	diploid
5710	13	5	pos30	ssd1	0	2	8	407	5.8	5.8.2	CCR4/ccr4- SSD1/ssd1- 3n.Chr12	ccr4	diploid
5711	13	5	pos31	ccr4	0	3	8	195	5.8	5.8.3	CCR4/ccr4- SSD1/ssd1- 3n.Chr12	ccr4	diploid
5712	13	5	pos32	WT	1	4	8	314	5.8	5.8.4	CCR4/ccr4- SSD1/ssd1- 3n.Chr12	ccr4	diploid
5713	13	6	pos1	ssd1	1	1	1	79	6.1	6.1.1	CCR4/ccr4- SSD1/ssd1- 3n.Chr12	ccr4	diploid
5714	13	6	pos2	ssd1_ccr4	1	2	1	75	6.1	6.1.2	CCR4/ccr4- SSD1/ssd1- 3n.Chr12	ccr4	diploid
5715	13	6	pos3	WT	0	3	1	379	6.1	6.1.3	CCR4/ccr4- SSD1/ssd1- 3n.Chr12	ccr4	diploid
5716	13	6	pos4	ccr4	0	4	1	200	6.1	6.1.4	CCR4/ccr4- SSD1/ssd1- 3n.Chr12	ccr4	diploid
5717	13	6	pos5	ssd1_ccr4	0	1	2	177	6.2	6.2.1	CCR4/ccr4- SSD1/ssd1- 3n.Chr12	ccr4	diploid
5718	13	6	pos6	ssd1_ccr4	0	2	2	86	6.2	6.2.2	CCR4/ccr4- SSD1/ssd1- 3n.Chr12	ccr4	diploid
5719	13	6	pos7	WT	1	3	2	308	6.2	6.2.3	CCR4/ccr4- SSD1/ssd1- 3n.Chr12	ccr4	diploid
5720	13	6	pos8	WT	1	4	2	315	6.2	6.2.4	CCR4/ccr4- SSD1/ssd1- 3n.Chr12	ccr4	diploid
5721	13	6	pos9	ccr4	0	1	3	184	6.3	6.3.1	CCR4/ccr4- SSD1/ssd1- 3n.Chr12	ccr4	diploid
5722	13	6	pos10	ssd1	0	2	3	410	6.3	6.3.2	CCR4/ccr4- SSD1/ssd1- 3n.Chr12	ccr4	diploid
5723	13	6	pos11	ccr4	1	3	3	167	6.3	6.3.3	CCR4/ccr4- SSD1/ssd1- 3n.Chr12	ccr4	diploid
5724	13	6	pos12	ssd1	1	4	3	51	6.3	6.3.4	CCR4/ccr4- SSD1/ssd1- 3n.Chr12	ccr4	diploid
5725	13	6	pos13	ccr4	1	1	4	173	6.4	6.4.1	CCR4/ccr4- SSD1/ssd1- 3n.Chr12	ccr4	diploid
5726	13	6	pos14	ssd1_ccr4	0	2	4	160	6.4	6.4.2	CCR4/ccr4- SSD1/ssd1- 3n.Chr12	ccr4	diploid
5727	13	6	pos15	ssd1	1	3	4	56	6.4	6.4.3	CCR4/ccr4- SSD1/ssd1- 3n.Chr12	ccr4	diploid
5728	13	6	pos16	WT	0	4	4	399	6.4	6.4.4	CCR4/ccr4- SSD1/ssd1- 3n.Chr12	ccr4	diploid
5729	13	6	pos17	WT	0	1	5	337	6.5	6.5.1	CCR4/ccr4- SSD1/ssd1- 3n.Chr12	ccr4	diploid
5730	13	6	pos18	ssd1_ccr4	0	2	5	210	6.5	6.5.2	CCR4/ccr4- SSD1/ssd1- 3n.Chr12	ccr4	diploid
5731	13	6	pos19	ccr4	1	3	5	162	6.5	6.5.3	CCR4/ccr4- SSD1/ssd1- 3n.Chr12	ccr4	diploid
5732	13	6	pos20	ssd1	1	4	5	76	6.5	6.5.4	CCR4/ccr4- SSD1/ssd1- 3n.Chr12	ccr4	diploid
5733	13	6	pos21	ssd1_ccr4	0	1	6	210	6.6	6.6.1	CCR4/ccr4- SSD1/ssd1- 3n.Chr12	ccr4	diploid
5734	13	6	pos22	ccr4	1	2	6	165	6.6	6.6.2	CCR4/ccr4- SSD1/ssd1- 3n.Chr12	ccr4	diploid
5735	13	6	pos23	ssd1	1	3	6	66	6.6	6.6.3	CCR4/ccr4- SSD1/ssd1- 3n.Chr12	ccr4	diploid
5736	13	6	pos24	WT	0	4	6	370	6.6	6.6.4	CCR4/ccr4- SSD1/ssd1- 3n.Chr12	ccr4	diploid
5741	13	6	pos29	ssd1_ccr4	1	1	8	3	6.8	6.8.1	CCR4/ccr4- SSD1/ssd1- 3n.Chr12	ccr4	diploid
5742	13	6	pos30	ssd1_ccr4	1	2	8	64	6.8	6.8.2	CCR4/ccr4- SSD1/ssd1- 3n.Chr12	ccr4	diploid
5743	13	6	pos31	WT	0	3	8	386	6.8	6.8.3	CCR4/ccr4- SSD1/ssd1- 3n.Chr12	ccr4	diploid
5744	13	6	pos32	WT	0	4	8	327	6.8	6.8.4	CCR4/ccr4- SSD1/ssd1- 3n.Chr12	ccr4	diploid
5753	15	1	pos9	ssd1_dhh1	0	1	3	74	1.3	1.3.1	DHH1/dhh1- SSD1/ssd1- 3n.Chr12	dhh1	diploid
5754	15	1	pos10	WT	0	2	3	357	1.3	1.3.2	DHH1/dhh1- SSD1/ssd1- 3n.Chr12	dhh1	diploid
5755	15	1	pos11	ssd1	1	3	3	74	1.3	1.3.3	DHH1/dhh1- SSD1/ssd1- 3n.Chr12	dhh1	diploid
5756	15	1	pos12	dhh1	1	4	3	89	1.3	1.3.4	DHH1/dhh1- SSD1/ssd1- 3n.Chr12	dhh1	diploid
5757	15	1	pos13	ssd1_dhh1	0	1	4	75	1.4	1.4.1	DHH1/dhh1- SSD1/ssd1- 3n.Chr12	dhh1	diploid
5758	15	1	pos14	WT	1	2	4	317	1.4	1.4.2	DHH1/dhh1- SSD1/ssd1- 3n.Chr12	dhh1	diploid
5759	15	1	pos15	ssd1	0	3	4	448	1.4	1.4.3	DHH1/dhh1- SSD1/ssd1- 3n.Chr12	dhh1	diploid
5760	15	1	pos16	dhh1	1	4	4	173	1.4	1.4.4	DHH1/dhh1- SSD1/ssd1- 3n.Chr12	dhh1	diploid
5761	15	1	pos17	ssd1_dhh1	1	1	5	3	1.5	1.5.1	DHH1/dhh1- SSD1/ssd1- 3n.Chr12	dhh1	diploid
5762	15	1	pos18	WT	0	2	5	347	1.5	1.5.2	DHH1/dhh1- SSD1/ssd1- 3n.Chr12	dhh1	diploid
5763	15	1	pos19	ssd1_dhh1	0	3	5	47	1.5	1.5.3	DHH1/dhh1- SSD1/ssd1- 3n.Chr12	dhh1	diploid
5764	15	1	pos20	WT	1	4	5	302	1.5	1.5.4	DHH1/dhh1- SSD1/ssd1- 3n.Chr12	dhh1	diploid
5769	15	1	pos25	WT	0	1	7	448	1.7	1.7.1	DHH1/dhh1- SSD1/ssd1- 3n.Chr12	dhh1	diploid
5770	15	1	pos26	WT	1	2	7	348	1.7	1.7.2	DHH1/dhh1- SSD1/ssd1- 3n.Chr12	dhh1	diploid
5771	15	1	pos27	ssd1_dhh1	0	3	7	110	1.7	1.7.3	DHH1/dhh1- SSD1/ssd1- 3n.Chr12	dhh1	diploid
5772	15	1	pos28	ssd1_dhh1	1	4	7	38	1.7	1.7.4	DHH1/dhh1- SSD1/ssd1- 3n.Chr12	dhh1	diploid
5773	15	1	pos29	WT	1	1	8	260	1.8	1.8.1	DHH1/dhh1- SSD1/ssd1- 3n.Chr12	dhh1	diploid
5774	15	1	pos30	ssd1_dhh1	0	2	8	41	1.8	1.8.2	DHH1/dhh1- SSD1/ssd1- 3n.Chr12	dhh1	diploid
5775	15	1	pos31	ssd1	0	3	8	447	1.8	1.8.3	DHH1/dhh1- SSD1/ssd1- 3n.Chr12	dhh1	diploid
5776	15	1	pos32	dhh1	1	4	8	183	1.8	1.8.4	DHH1/dhh1- SSD1/ssd1- 3n.Chr12	dhh1	diploid
5777	15	2	pos5	ssd1_dhh1	1	1	2	28	2.2	2.2.1	DHH1/dhh1- SSD1/ssd1- 3n.Chr12	dhh1	diploid
5778	15	2	pos6	WT	1	2	2	312	2.2	2.2.2	DHH1/dhh1- SSD1/ssd1- 3n.Chr12	dhh1	diploid
5779	15	2	pos7	ssd1_dhh1	0	3	2	73	2.2	2.2.3	DHH1/dhh1- SSD1/ssd1- 3n.Chr12	dhh1	diploid
5780	15	2	pos8	WT	0	4	2	405	2.2	2.2.4	DHH1/dhh1- SSD1/ssd1- 3n.Chr12	dhh1	diploid
5781	15	2	pos9	dhh1	1	1	3	30	2.3	2.3.1	DHH1/dhh1- SSD1/ssd1- 3n.Chr12	dhh1	diploid
5782	15	2	pos10	dhh1	0	2	3	222	2.3	2.3.2	DHH1/dhh1- SSD1/ssd1- 3n.Chr12	dhh1	diploid
5783	15	2	pos11	ssd1	0	3	3	435	2.3	2.3.3	DHH1/dhh1- SSD1/ssd1- 3n.Chr12	dhh1	diploid
5784	15	2	pos12	ssd1	1	4	3	59	2.3	2.3.4	DHH1/dhh1- SSD1/ssd1- 3n.Chr12	dhh1	diploid
5799	15	2	pos27	WT	0	3	7	430	2.7	2.7.3	DHH1/dhh1- SSD1/ssd1- 3n.Chr12	dhh1	diploid
5800	15	2	pos28	ssd1	1	4	7	72	2.7	2.7.4	DHH1/dhh1- SSD1/ssd1- 3n.Chr12	dhh1	diploid
5801	15	2	pos29	dhh1	0	1	8	219	2.8	2.8.1	DHH1/dhh1- SSD1/ssd1- 3n.Chr12	dhh1	diploid
5802	15	2	pos30	ssd1	0	2	8	461	2.8	2.8.2	DHH1/dhh1- SSD1/ssd1- 3n.Chr12	dhh1	diploid
5803	15	2	pos31	ssd1	1	3	8	69	2.8	2.8.3	DHH1/dhh1- SSD1/ssd1- 3n.Chr12	dhh1	diploid
5804	15	2	pos32	dhh1	1	4	8	49	2.8	2.8.4	DHH1/dhh1- SSD1/ssd1- 3n.Chr12	dhh1	diploid
5813	15	3	pos9	dhh1	0	1	3	204	3.3	3.3.1	DHH1/dhh1- SSD1/ssd1- 3n.Chr12	dhh1	diploid
5814	15	3	pos10	ssd1_dhh1	0	2	3	40	3.3	3.3.2	DHH1/dhh1- SSD1/ssd1- 3n.Chr12	dhh1	diploid
5815	15	3	pos11	ssd1	1	3	3	68	3.3	3.3.3	DHH1/dhh1- SSD1/ssd1- 3n.Chr12	dhh1	diploid
5816	15	3	pos12	WT	1	4	3	331	3.3	3.3.4	DHH1/dhh1- SSD1/ssd1- 3n.Chr12	dhh1	diploid
5817	15	3	pos13	ssd1	0	1	4	411	3.4	3.4.1	DHH1/dhh1- SSD1/ssd1- 3n.Chr12	dhh1	diploid
5818	15	3	pos14	ssd1_dhh1	0	2	4	72	3.4	3.4.2	DHH1/dhh1- SSD1/ssd1- 3n.Chr12	dhh1	diploid
5819	15	3	pos15	dhh1	1	3	4	155	3.4	3.4.3	DHH1/dhh1- SSD1/ssd1- 3n.Chr12	dhh1	diploid
5820	15	3	pos16	WT	1	4	4	315	3.4	3.4.4	DHH1/dhh1- SSD1/ssd1- 3n.Chr12	dhh1	diploid
5821	15	3	pos21	ssd1	1	1	6	74	3.6	3.6.1	DHH1/dhh1- SSD1/ssd1- 3n.Chr12	dhh1	diploid
5822	15	3	pos22	dhh1	0	2	6	89	3.6	3.6.2	DHH1/dhh1- SSD1/ssd1- 3n.Chr12	dhh1	diploid
5823	15	3	pos23	dhh1	0	3	6	211	3.6	3.6.3	DHH1/dhh1- SSD1/ssd1- 3n.Chr12	dhh1	diploid
5824	15	3	pos24	WT	1	4	6	328	3.6	3.6.4	DHH1/dhh1- SSD1/ssd1- 3n.Chr12	dhh1	diploid
5825	15	3	pos29	ssd1_dhh1	1	1	8	29	3.8	3.8.1	DHH1/dhh1- SSD1/ssd1- 3n.Chr12	dhh1	diploid
5826	15	3	pos30	WT	0	2	8	398	3.8	3.8.2	DHH1/dhh1- SSD1/ssd1- 3n.Chr12	dhh1	diploid
5827	15	3	pos31	WT	0	3	8	368	3.8	3.8.3	DHH1/dhh1- SSD1/ssd1- 3n.Chr12	dhh1	diploid
5828	15	3	pos32	ssd1_dhh1	1	4	8	36	3.8	3.8.4	DHH1/dhh1- SSD1/ssd1- 3n.Chr12	dhh1	diploid
5845	15	4	pos21	WT	0	1	6	323	4.6	4.6.1	DHH1/dhh1- SSD1/ssd1- 3n.Chr12	dhh1	diploid
5846	15	4	pos22	ssd1_dhh1	1	2	6	21	4.6	4.6.2	DHH1/dhh1- SSD1/ssd1- 3n.Chr12	dhh1	diploid
5847	15	4	pos23	WT	1	3	6	279	4.6	4.6.3	DHH1/dhh1- SSD1/ssd1- 3n.Chr12	dhh1	diploid
5848	15	4	pos24	ssd1_dhh1	0	4	6	39	4.6	4.6.4	DHH1/dhh1- SSD1/ssd1- 3n.Chr12	dhh1	diploid
5849	15	4	pos25	ssd1	1	1	7	61	4.7	4.7.1	DHH1/dhh1- SSD1/ssd1- 3n.Chr12	dhh1	diploid
5850	15	4	pos26	dhh1	1	2	7	175	4.7	4.7.2	DHH1/dhh1- SSD1/ssd1- 3n.Chr12	dhh1	diploid
5851	15	4	pos27	dhh1	0	3	7	210	4.7	4.7.3	DHH1/dhh1- SSD1/ssd1- 3n.Chr12	dhh1	diploid
5852	15	4	pos28	ssd1	0	4	7	436	4.7	4.7.4	DHH1/dhh1- SSD1/ssd1- 3n.Chr12	dhh1	diploid
5853	15	4	pos29	ssd1	0	1	8	446	4.8	4.8.1	DHH1/dhh1- SSD1/ssd1- 3n.Chr12	dhh1	diploid
5854	15	4	pos30	dhh1	1	2	8	106	4.8	4.8.2	DHH1/dhh1- SSD1/ssd1- 3n.Chr12	dhh1	diploid
5855	15	4	pos31	ssd1	0	3	8	439	4.8	4.8.3	DHH1/dhh1- SSD1/ssd1- 3n.Chr12	dhh1	diploid
5856	15	4	pos32	dhh1	1	4	8	161	4.8	4.8.4	DHH1/dhh1- SSD1/ssd1- 3n.Chr12	dhh1	diploid
5877	15	5	pos21	dhh1	0	1	6	203	5.6	5.6.1	DHH1/dhh1- SSD1/ssd1- 3n.Chr12	dhh1	diploid
5878	15	5	pos22	ssd1	0	2	6	426	5.6	5.6.2	DHH1/dhh1- SSD1/ssd1- 3n.Chr12	dhh1	diploid
5879	15	5	pos23	ssd1_dhh1	1	3	6	21	5.6	5.6.3	DHH1/dhh1- SSD1/ssd1- 3n.Chr12	dhh1	diploid
5880	15	5	pos24	WT	1	4	6	333	5.6	5.6.4	DHH1/dhh1- SSD1/ssd1- 3n.Chr12	dhh1	diploid
5881	15	5	pos25	ssd1	0	1	7	399	5.7	5.7.1	DHH1/dhh1- SSD1/ssd1- 3n.Chr12	dhh1	diploid
5882	15	5	pos26	WT	1	2	7	302	5.7	5.7.2	DHH1/dhh1- SSD1/ssd1- 3n.Chr12	dhh1	diploid
5885	15	5	pos29	ssd1_dhh1	1	1	8	24	5.8	5.8.1	DHH1/dhh1- SSD1/ssd1- 3n.Chr12	dhh1	diploid
5886	15	5	pos30	WT	0	2	8	399	5.8	5.8.2	DHH1/dhh1- SSD1/ssd1- 3n.Chr12	dhh1	diploid
5887	15	5	pos31	dhh1	1	3	8	166	5.8	5.8.3	DHH1/dhh1- SSD1/ssd1- 3n.Chr12	dhh1	diploid
5888	15	5	pos32	ssd1	0	4	8	418	5.8	5.8.4	DHH1/dhh1- SSD1/ssd1- 3n.Chr12	dhh1	diploid
5893	15	6	pos5	dhh1	1	1	2	79	6.2	6.2.1	DHH1/dhh1- SSD1/ssd1- 3n.Chr12	dhh1	diploid
5894	15	6	pos6	ssd1_dhh1	0	2	2	38	6.2	6.2.2	DHH1/dhh1- SSD1/ssd1- 3n.Chr12	dhh1	diploid
5895	15	6	pos7	ssd1	1	3	2	49	6.2	6.2.3	DHH1/dhh1- SSD1/ssd1- 3n.Chr12	dhh1	diploid
5896	15	6	pos8	WT	0	4	2	357	6.2	6.2.4	DHH1/dhh1- SSD1/ssd1- 3n.Chr12	dhh1	diploid
5897	15	6	pos9	ssd1	1	1	3	71	6.3	6.3.1	DHH1/dhh1- SSD1/ssd1- 3n.Chr12	dhh1	diploid
5898	15	6	pos10	WT	0	2	3	393	6.3	6.3.2	DHH1/dhh1- SSD1/ssd1- 3n.Chr12	dhh1	diploid
5899	15	6	pos11	dhh1	1	3	3	33	6.3	6.3.3	DHH1/dhh1- SSD1/ssd1- 3n.Chr12	dhh1	diploid
5900	15	6	pos12	ssd1_dhh1	0	4	3	134	6.3	6.3.4	DHH1/dhh1- SSD1/ssd1- 3n.Chr12	dhh1	diploid
5901	15	6	pos13	WT	1	1	4	317	6.4	6.4.1	DHH1/dhh1- SSD1/ssd1- 3n.Chr12	dhh1	diploid
5902	15	6	pos14	ssd1_dhh1	0	2	4	53	6.4	6.4.2	DHH1/dhh1- SSD1/ssd1- 3n.Chr12	dhh1	diploid
5903	15	6	pos15	WT	0	3	4	374	6.4	6.4.3	DHH1/dhh1- SSD1/ssd1- 3n.Chr12	dhh1	diploid
5904	15	6	pos16	ssd1_dhh1	1	4	4	20	6.4	6.4.4	DHH1/dhh1- SSD1/ssd1- 3n.Chr12	dhh1	diploid
5905	15	6	pos17	ssd1	0	1	5	412	6.5	6.5.1	DHH1/dhh1- SSD1/ssd1- 3n.Chr12	dhh1	diploid
5906	15	6	pos18	dhh1	1	2	5	161	6.5	6.5.2	DHH1/dhh1- SSD1/ssd1- 3n.Chr12	dhh1	diploid
5907	15	6	pos19	ssd1_dhh1	0	3	5	72	6.5	6.5.3	DHH1/dhh1- SSD1/ssd1- 3n.Chr12	dhh1	diploid
5908	15	6	pos20	WT	1	4	5	341	6.5	6.5.4	DHH1/dhh1- SSD1/ssd1- 3n.Chr12	dhh1	diploid
5917	15	6	pos29	dhh1	0	1	8	188	6.8	6.8.1	DHH1/dhh1- SSD1/ssd1- 3n.Chr12	dhh1	diploid
5918	15	6	pos30	ssd1	1	2	8	75	6.8	6.8.2	DHH1/dhh1- SSD1/ssd1- 3n.Chr12	dhh1	diploid
5919	15	6	pos31	ssd1_dhh1	1	3	8	18	6.8	6.8.3	DHH1/dhh1- SSD1/ssd1- 3n.Chr12	dhh1	diploid
5920	15	6	pos32	WT	0	4	8	364	6.8	6.8.4	DHH1/dhh1- SSD1/ssd1- 3n.Chr12	dhh1	diploid
5925	19	1	pos5	ssd1_pat1	0	1	2	80	1.2	1.2.1	PAT1/pat1- SSD1/ssd1- 3n.Chr12	pat1	diploid
5926	19	1	pos6	ssd1_pat1	1	2	2	14	1.2	1.2.2	PAT1/pat1- SSD1/ssd1- 3n.Chr12	pat1	diploid
5927	19	1	pos7	WT	1	3	2	334	1.2	1.2.3	PAT1/pat1- SSD1/ssd1- 3n.Chr12	pat1	diploid
5928	19	1	pos8	WT	0	4	2	399	1.2	1.2.4	PAT1/pat1- SSD1/ssd1- 3n.Chr12	pat1	diploid
5933	19	1	pos13	pat1	0	1	4	156	1.4	1.4.1	PAT1/pat1- SSD1/ssd1- 3n.Chr12	pat1	diploid
5934	19	1	pos14	pat1	1	2	4	100	1.4	1.4.2	PAT1/pat1- SSD1/ssd1- 3n.Chr12	pat1	diploid
5935	19	1	pos15	ssd1	0	3	4	465	1.4	1.4.3	PAT1/pat1- SSD1/ssd1- 3n.Chr12	pat1	diploid
5936	19	1	pos16	ssd1	1	4	4	89	1.4	1.4.4	PAT1/pat1- SSD1/ssd1- 3n.Chr12	pat1	diploid
5945	19	1	pos25	ssd1_pat1	0	1	7	83	1.7	1.7.1	PAT1/pat1- SSD1/ssd1- 3n.Chr12	pat1	diploid
5946	19	1	pos26	pat1	1	2	7	97	1.7	1.7.2	PAT1/pat1- SSD1/ssd1- 3n.Chr12	pat1	diploid
5947	19	1	pos27	WT	1	3	7	328	1.7	1.7.3	PAT1/pat1- SSD1/ssd1- 3n.Chr12	pat1	diploid
5948	19	1	pos28	ssd1	0	4	7	411	1.7	1.7.4	PAT1/pat1- SSD1/ssd1- 3n.Chr12	pat1	diploid
5949	19	1	pos29	pat1	1	1	8	101	1.8	1.8.1	PAT1/pat1- SSD1/ssd1- 3n.Chr12	pat1	diploid
5950	19	1	pos30	ssd1	1	2	8	79	1.8	1.8.2	PAT1/pat1- SSD1/ssd1- 3n.Chr12	pat1	diploid
5951	19	1	pos31	pat1	0	3	8	189	1.8	1.8.3	PAT1/pat1- SSD1/ssd1- 3n.Chr12	pat1	diploid
5952	19	1	pos32	ssd1	0	4	8	424	1.8	1.8.4	PAT1/pat1- SSD1/ssd1- 3n.Chr12	pat1	diploid
5953	19	2	pos1	WT	0	1	1	368	2.1	2.1.1	PAT1/pat1- SSD1/ssd1- 3n.Chr12	pat1	diploid
5954	19	2	pos2	ssd1_pat1	0	2	1	87	2.1	2.1.2	PAT1/pat1- SSD1/ssd1- 3n.Chr12	pat1	diploid
5955	19	2	pos3	WT	1	3	1	361	2.1	2.1.3	PAT1/pat1- SSD1/ssd1- 3n.Chr12	pat1	diploid
5956	19	2	pos4	ssd1_pat1	1	4	1	15	2.1	2.1.4	PAT1/pat1- SSD1/ssd1- 3n.Chr12	pat1	diploid
5957	19	2	pos5	pat1	0	1	2	121	2.2	2.2.1	PAT1/pat1- SSD1/ssd1- 3n.Chr12	pat1	diploid
5958	19	2	pos6	ssd1	1	2	2	74	2.2	2.2.2	PAT1/pat1- SSD1/ssd1- 3n.Chr12	pat1	diploid
5959	19	2	pos7	WT	1	3	2	323	2.2	2.2.3	PAT1/pat1- SSD1/ssd1- 3n.Chr12	pat1	diploid
5960	19	2	pos8	ssd1_pat1	0	4	2	99	2.2	2.2.4	PAT1/pat1- SSD1/ssd1- 3n.Chr12	pat1	diploid
5965	19	2	pos13	ssd1_pat1	0	1	4	77	2.4	2.4.1	PAT1/pat1- SSD1/ssd1- 3n.Chr12	pat1	diploid
5966	19	2	pos14	pat1	1	2	4	95	2.4	2.4.2	PAT1/pat1- SSD1/ssd1- 3n.Chr12	pat1	diploid
5967	19	2	pos15	ssd1	1	3	4	50	2.4	2.4.3	PAT1/pat1- SSD1/ssd1- 3n.Chr12	pat1	diploid
5968	19	2	pos16	WT	0	4	4	443	2.4	2.4.4	PAT1/pat1- SSD1/ssd1- 3n.Chr12	pat1	diploid
5969	19	2	pos17	ssd1	0	1	5	433	2.5	2.5.1	PAT1/pat1- SSD1/ssd1- 3n.Chr12	pat1	diploid
5970	19	2	pos18	pat1	0	2	5	156	2.5	2.5.2	PAT1/pat1- SSD1/ssd1- 3n.Chr12	pat1	diploid
5971	19	2	pos19	WT	1	3	5	326	2.5	2.5.3	PAT1/pat1- SSD1/ssd1- 3n.Chr12	pat1	diploid
5972	19	2	pos20	ssd1_pat1	1	4	5	20	2.5	2.5.4	PAT1/pat1- SSD1/ssd1- 3n.Chr12	pat1	diploid
5973	19	2	pos21	ssd1_pat1	0	1	6	85	2.6	2.6.1	PAT1/pat1- SSD1/ssd1- 3n.Chr12	pat1	diploid
5974	19	2	pos22	WT	1	2	6	295	2.6	2.6.2	PAT1/pat1- SSD1/ssd1- 3n.Chr12	pat1	diploid
5975	19	2	pos23	WT	0	3	6	391	2.6	2.6.3	PAT1/pat1- SSD1/ssd1- 3n.Chr12	pat1	diploid
5976	19	2	pos24	ssd1_pat1	1	4	6	16	2.6	2.6.4	PAT1/pat1- SSD1/ssd1- 3n.Chr12	pat1	diploid
5977	19	2	pos25	ssd1_pat1	0	1	7	73	2.7	2.7.1	PAT1/pat1- SSD1/ssd1- 3n.Chr12	pat1	diploid
5978	19	2	pos26	WT	1	2	7	324	2.7	2.7.2	PAT1/pat1- SSD1/ssd1- 3n.Chr12	pat1	diploid
5979	19	2	pos27	ssd1_pat1	0	3	7	54	2.7	2.7.3	PAT1/pat1- SSD1/ssd1- 3n.Chr12	pat1	diploid
5980	19	2	pos28	WT	1	4	7	331	2.7	2.7.4	PAT1/pat1- SSD1/ssd1- 3n.Chr12	pat1	diploid
5981	19	2	pos29	ssd1	1	1	8	63	2.8	2.8.1	PAT1/pat1- SSD1/ssd1- 3n.Chr12	pat1	diploid
5982	19	2	pos30	pat1	0	2	8	194	2.8	2.8.2	PAT1/pat1- SSD1/ssd1- 3n.Chr12	pat1	diploid
5983	19	2	pos31	ssd1	1	3	8	79	2.8	2.8.3	PAT1/pat1- SSD1/ssd1- 3n.Chr12	pat1	diploid
5984	19	2	pos32	pat1	0	4	8	169	2.8	2.8.4	PAT1/pat1- SSD1/ssd1- 3n.Chr12	pat1	diploid
5985	19	3	pos1	ssd1_pat1	0	1	1	72	3.1	3.1.1	PAT1/pat1- SSD1/ssd1- 3n.Chr12	pat1	diploid
5986	19	3	pos2	pat1	1	2	1	74	3.1	3.1.2	PAT1/pat1- SSD1/ssd1- 3n.Chr12	pat1	diploid
5987	19	3	pos3	WT	1	3	1	266	3.1	3.1.3	PAT1/pat1- SSD1/ssd1- 3n.Chr12	pat1	diploid
5988	19	3	pos4	ssd1	0	4	1	419	3.1	3.1.4	PAT1/pat1- SSD1/ssd1- 3n.Chr12	pat1	diploid
5989	19	3	pos5	WT	0	1	2	379	3.2	3.2.1	PAT1/pat1- SSD1/ssd1- 3n.Chr12	pat1	diploid
5990	19	3	pos6	pat1	1	2	2	13	3.2	3.2.2	PAT1/pat1- SSD1/ssd1- 3n.Chr12	pat1	diploid
5991	19	3	pos7	ssd1	1	3	2	10	3.2	3.2.3	PAT1/pat1- SSD1/ssd1- 3n.Chr12	pat1	diploid
5992	19	3	pos8	WT	0	4	2	344	3.2	3.2.4	PAT1/pat1- SSD1/ssd1- 3n.Chr12	pat1	diploid
5993	19	3	pos9	pat1	0	1	3	212	3.3	3.3.1	PAT1/pat1- SSD1/ssd1- 3n.Chr12	pat1	diploid
5994	19	3	pos10	ssd1_pat1	1	2	3	8	3.3	3.3.2	PAT1/pat1- SSD1/ssd1- 3n.Chr12	pat1	diploid
5995	19	3	pos11	WT	0	3	3	440	3.3	3.3.3	PAT1/pat1- SSD1/ssd1- 3n.Chr12	pat1	diploid
5996	19	3	pos12	ssd1	1	4	3	70	3.3	3.3.4	PAT1/pat1- SSD1/ssd1- 3n.Chr12	pat1	diploid
6001	19	3	pos17	WT	0	1	5	426	3.5	3.5.1	PAT1/pat1- SSD1/ssd1- 3n.Chr12	pat1	diploid
6002	19	3	pos18	ssd1	1	2	5	53	3.5	3.5.2	PAT1/pat1- SSD1/ssd1- 3n.Chr12	pat1	diploid
6003	19	3	pos19	ssd1_pat1	0	3	5	71	3.5	3.5.3	PAT1/pat1- SSD1/ssd1- 3n.Chr12	pat1	diploid
6004	19	3	pos20	pat1	1	4	5	89	3.5	3.5.4	PAT1/pat1- SSD1/ssd1- 3n.Chr12	pat1	diploid
6005	19	3	pos21	pat1	0	1	6	171	3.6	3.6.1	PAT1/pat1- SSD1/ssd1- 3n.Chr12	pat1	diploid
6006	19	3	pos22	WT	0	2	6	395	3.6	3.6.2	PAT1/pat1- SSD1/ssd1- 3n.Chr12	pat1	diploid
6007	19	3	pos23	ssd1	1	3	6	60	3.6	3.6.3	PAT1/pat1- SSD1/ssd1- 3n.Chr12	pat1	diploid
6008	19	3	pos24	ssd1_pat1	1	4	6	21	3.6	3.6.4	PAT1/pat1- SSD1/ssd1- 3n.Chr12	pat1	diploid
6013	19	3	pos29	pat1	0	1	8	196	3.8	3.8.1	PAT1/pat1- SSD1/ssd1- 3n.Chr12	pat1	diploid
6014	19	3	pos30	ssd1	1	2	8	87	3.8	3.8.2	PAT1/pat1- SSD1/ssd1- 3n.Chr12	pat1	diploid
6015	19	3	pos31	ssd1_pat1	1	3	8	22	3.8	3.8.3	PAT1/pat1- SSD1/ssd1- 3n.Chr12	pat1	diploid
6016	19	3	pos32	WT	0	4	8	419	3.8	3.8.4	PAT1/pat1- SSD1/ssd1- 3n.Chr12	pat1	diploid
6017	19	4	pos1	WT	1	1	1	292	4.1	4.1.1	PAT1/pat1- SSD1/ssd1- 3n.Chr12	pat1	diploid
6018	19	4	pos2	ssd1_pat1	0	2	1	81	4.1	4.1.2	PAT1/pat1- SSD1/ssd1- 3n.Chr12	pat1	diploid
6019	19	4	pos3	ssd1	0	3	1	412	4.1	4.1.3	PAT1/pat1- SSD1/ssd1- 3n.Chr12	pat1	diploid
6020	19	4	pos4	pat1	1	4	1	18	4.1	4.1.4	PAT1/pat1- SSD1/ssd1- 3n.Chr12	pat1	diploid
6021	19	4	pos5	WT	0	1	2	363	4.2	4.2.1	PAT1/pat1- SSD1/ssd1- 3n.Chr12	pat1	diploid
6022	19	4	pos6	pat1	0	2	2	173	4.2	4.2.2	PAT1/pat1- SSD1/ssd1- 3n.Chr12	pat1	diploid
6023	19	4	pos7	ssd1	1	3	2	69	4.2	4.2.3	PAT1/pat1- SSD1/ssd1- 3n.Chr12	pat1	diploid
6024	19	4	pos8	ssd1_pat1	1	4	2	17	4.2	4.2.4	PAT1/pat1- SSD1/ssd1- 3n.Chr12	pat1	diploid
6025	19	4	pos9	ssd1_pat1	1	1	3	22	4.3	4.3.1	PAT1/pat1- SSD1/ssd1- 3n.Chr12	pat1	diploid
6026	19	4	pos10	pat1	0	2	3	98	4.3	4.3.2	PAT1/pat1- SSD1/ssd1- 3n.Chr12	pat1	diploid
6027	19	4	pos11	WT	0	3	3	408	4.3	4.3.3	PAT1/pat1- SSD1/ssd1- 3n.Chr12	pat1	diploid
6028	19	4	pos12	ssd1	1	4	3	59	4.3	4.3.4	PAT1/pat1- SSD1/ssd1- 3n.Chr12	pat1	diploid
6029	19	4	pos13	ssd1	0	1	4	400	4.4	4.4.1	PAT1/pat1- SSD1/ssd1- 3n.Chr12	pat1	diploid
6030	19	4	pos14	WT	1	2	4	323	4.4	4.4.2	PAT1/pat1- SSD1/ssd1- 3n.Chr12	pat1	diploid
6031	19	4	pos15	pat1	0	3	4	172	4.4	4.4.3	PAT1/pat1- SSD1/ssd1- 3n.Chr12	pat1	diploid
6032	19	4	pos16	ssd1_pat1	1	4	4	8	4.4	4.4.4	PAT1/pat1- SSD1/ssd1- 3n.Chr12	pat1	diploid
6049	19	5	pos1	ssd1	1	1	1	56	5.1	5.1.1	PAT1/pat1- SSD1/ssd1- 3n.Chr12	pat1	diploid
6050	19	5	pos2	ssd1_pat1	0	2	1	79	5.1	5.1.2	PAT1/pat1- SSD1/ssd1- 3n.Chr12	pat1	diploid
6051	19	5	pos3	pat1	1	3	1	113	5.1	5.1.3	PAT1/pat1- SSD1/ssd1- 3n.Chr12	pat1	diploid
6052	19	5	pos4	WT	0	4	1	402	5.1	5.1.4	PAT1/pat1- SSD1/ssd1- 3n.Chr12	pat1	diploid
6053	19	5	pos5	pat1	1	1	2	10	5.2	5.2.1	PAT1/pat1- SSD1/ssd1- 3n.Chr12	pat1	diploid
6054	19	5	pos6	WT	1	2	2	331	5.2	5.2.2	PAT1/pat1- SSD1/ssd1- 3n.Chr12	pat1	diploid
6055	19	5	pos7	ssd1_pat1	0	3	2	61	5.2	5.2.3	PAT1/pat1- SSD1/ssd1- 3n.Chr12	pat1	diploid
6056	19	5	pos8	WT	0	4	2	308	5.2	5.2.4	PAT1/pat1- SSD1/ssd1- 3n.Chr12	pat1	diploid
6061	19	5	pos13	WT	1	1	4	328	5.4	5.4.1	PAT1/pat1- SSD1/ssd1- 3n.Chr12	pat1	diploid
6062	19	5	pos14	ssd1_pat1	1	2	4	12	5.4	5.4.2	PAT1/pat1- SSD1/ssd1- 3n.Chr12	pat1	diploid
6063	19	5	pos15	pat1	0	3	4	199	5.4	5.4.3	PAT1/pat1- SSD1/ssd1- 3n.Chr12	pat1	diploid
6064	19	5	pos16	ssd1	0	4	4	372	5.4	5.4.4	PAT1/pat1- SSD1/ssd1- 3n.Chr12	pat1	diploid
6065	19	5	pos17	ssd1_pat1	1	1	5	11	5.5	5.5.1	PAT1/pat1- SSD1/ssd1- 3n.Chr12	pat1	diploid
6066	19	5	pos18	pat1	1	2	5	107	5.5	5.5.2	PAT1/pat1- SSD1/ssd1- 3n.Chr12	pat1	diploid
6067	19	5	pos19	WT	0	3	5	372	5.5	5.5.3	PAT1/pat1- SSD1/ssd1- 3n.Chr12	pat1	diploid
6068	19	5	pos20	ssd1	0	4	5	382	5.5	5.5.4	PAT1/pat1- SSD1/ssd1- 3n.Chr12	pat1	diploid
6069	19	5	pos21	pat1	1	1	6	101	5.6	5.6.1	PAT1/pat1- SSD1/ssd1- 3n.Chr12	pat1	diploid
6070	19	5	pos22	ssd1	1	2	6	67	5.6	5.6.2	PAT1/pat1- SSD1/ssd1- 3n.Chr12	pat1	diploid
6071	19	5	pos23	pat1	0	3	6	185	5.6	5.6.3	PAT1/pat1- SSD1/ssd1- 3n.Chr12	pat1	diploid
6072	19	5	pos24	ssd1	0	4	6	417	5.6	5.6.4	PAT1/pat1- SSD1/ssd1- 3n.Chr12	pat1	diploid
6073	19	5	pos25	ssd1_pat1	0	1	7	78	5.7	5.7.1	PAT1/pat1- SSD1/ssd1- 3n.Chr12	pat1	diploid
6074	19	5	pos26	ssd1_pat1	0	2	7	71	5.7	5.7.2	PAT1/pat1- SSD1/ssd1- 3n.Chr12	pat1	diploid
6075	19	5	pos27	WT	1	3	7	324	5.7	5.7.3	PAT1/pat1- SSD1/ssd1- 3n.Chr12	pat1	diploid
6076	19	5	pos28	WT	1	4	7	291	5.7	5.7.4	PAT1/pat1- SSD1/ssd1- 3n.Chr12	pat1	diploid
6077	19	5	pos29	ssd1	0	1	8	378	5.8	5.8.1	PAT1/pat1- SSD1/ssd1- 3n.Chr12	pat1	diploid
6078	19	5	pos30	pat1	1	2	8	99	5.8	5.8.2	PAT1/pat1- SSD1/ssd1- 3n.Chr12	pat1	diploid
6079	19	5	pos31	pat1	0	3	8	181	5.8	5.8.3	PAT1/pat1- SSD1/ssd1- 3n.Chr12	pat1	diploid
6080	19	5	pos32	ssd1	1	4	8	60	5.8	5.8.4	PAT1/pat1- SSD1/ssd1- 3n.Chr12	pat1	diploid
6081	19	6	pos5	ssd1	0	1	2	329	6.2	6.2.1	PAT1/pat1- SSD1/ssd1- 3n.Chr12	pat1	diploid
6082	19	6	pos6	pat1	1	2	2	5	6.2	6.2.2	PAT1/pat1- SSD1/ssd1- 3n.Chr12	pat1	diploid
6083	19	6	pos7	ssd1_pat1	0	3	2	73	6.2	6.2.3	PAT1/pat1- SSD1/ssd1- 3n.Chr12	pat1	diploid
6084	19	6	pos8	WT	1	4	2	252	6.2	6.2.4	PAT1/pat1- SSD1/ssd1- 3n.Chr12	pat1	diploid
6090	19	6	pos14	pat1	1	2	4	115	6.4	6.4.2	PAT1/pat1- SSD1/ssd1- 3n.Chr12	pat1	diploid
6092	19	6	pos16	WT	0	4	4	332	6.4	6.4.4	PAT1/pat1- SSD1/ssd1- 3n.Chr12	pat1	diploid
6097	19	6	pos21	ssd1_pat1	1	1	6	6	6.6	6.6.1	PAT1/pat1- SSD1/ssd1- 3n.Chr12	pat1	diploid
6098	19	6	pos22	pat1	0	2	6	189	6.6	6.6.2	PAT1/pat1- SSD1/ssd1- 3n.Chr12	pat1	diploid
6099	19	6	pos23	WT	1	3	6	358	6.6	6.6.3	PAT1/pat1- SSD1/ssd1- 3n.Chr12	pat1	diploid
6100	19	6	pos24	ssd1	0	4	6	466	6.6	6.6.4	PAT1/pat1- SSD1/ssd1- 3n.Chr12	pat1	diploid
6105	37	1	pos1	ssd1_pub1	0	1	1	278	1.1	1.1.1	PUB1/pub1- SSD1/ssd1- 3n.Chr12	pub1	diploid
6106	37	1	pos2	ssd1	1	2	1	64	1.1	1.1.2	PUB1/pub1- SSD1/ssd1- 3n.Chr12	pub1	diploid
6107	37	1	pos3	WT	1	3	1	311	1.1	1.1.3	PUB1/pub1- SSD1/ssd1- 3n.Chr12	pub1	diploid
6108	37	1	pos4	pub1	0	4	1	289	1.1	1.1.4	PUB1/pub1- SSD1/ssd1- 3n.Chr12	pub1	diploid
6109	37	1	pos5	WT	0	1	2	277	1.2	1.2.1	PUB1/pub1- SSD1/ssd1- 3n.Chr12	pub1	diploid
6110	37	1	pos6	pub1	1	2	2	264	1.2	1.2.2	PUB1/pub1- SSD1/ssd1- 3n.Chr12	pub1	diploid
6111	37	1	pos7	ssd1_pub1	1	3	2	99	1.2	1.2.3	PUB1/pub1- SSD1/ssd1- 3n.Chr12	pub1	diploid
6112	37	1	pos8	ssd1	0	4	2	361	1.2	1.2.4	PUB1/pub1- SSD1/ssd1- 3n.Chr12	pub1	diploid
6113	37	1	pos9	WT	0	1	3	316	1.3	1.3.1	PUB1/pub1- SSD1/ssd1- 3n.Chr12	pub1	diploid
6114	37	1	pos10	ssd1	0	2	3	381	1.3	1.3.2	PUB1/pub1- SSD1/ssd1- 3n.Chr12	pub1	diploid
6115	37	1	pos11	ssd1_pub1	1	3	3	91	1.3	1.3.3	PUB1/pub1- SSD1/ssd1- 3n.Chr12	pub1	diploid
6116	37	1	pos12	pub1	1	4	3	271	1.3	1.3.4	PUB1/pub1- SSD1/ssd1- 3n.Chr12	pub1	diploid
6117	37	1	pos13	pub1	1	1	4	247	1.4	1.4.1	PUB1/pub1- SSD1/ssd1- 3n.Chr12	pub1	diploid
6118	37	1	pos14	pub1	1	2	4	243	1.4	1.4.2	PUB1/pub1- SSD1/ssd1- 3n.Chr12	pub1	diploid
6119	37	1	pos15	ssd1	0	3	4	331	1.4	1.4.3	PUB1/pub1- SSD1/ssd1- 3n.Chr12	pub1	diploid
6120	37	1	pos16	ssd1	0	4	4	370	1.4	1.4.4	PUB1/pub1- SSD1/ssd1- 3n.Chr12	pub1	diploid
6121	37	1	pos17	pub1	1	1	5	297	1.5	1.5.1	PUB1/pub1- SSD1/ssd1- 3n.Chr12	pub1	diploid
6122	37	1	pos18	WT	1	2	5	264	1.5	1.5.2	PUB1/pub1- SSD1/ssd1- 3n.Chr12	pub1	diploid
6123	37	1	pos19	ssd1_pub1	0	3	5	314	1.5	1.5.3	PUB1/pub1- SSD1/ssd1- 3n.Chr12	pub1	diploid
6124	37	1	pos20	ssd1	0	4	5	401	1.5	1.5.4	PUB1/pub1- SSD1/ssd1- 3n.Chr12	pub1	diploid
6125	37	1	pos21	pub1	1	1	6	288	1.6	1.6.1	PUB1/pub1- SSD1/ssd1- 3n.Chr12	pub1	diploid
6126	37	1	pos22	ssd1	0	2	6	357	1.6	1.6.2	PUB1/pub1- SSD1/ssd1- 3n.Chr12	pub1	diploid
6127	37	1	pos23	ssd1	0	3	6	332	1.6	1.6.3	PUB1/pub1- SSD1/ssd1- 3n.Chr12	pub1	diploid
6128	37	1	pos24	pub1	1	4	6	288	1.6	1.6.4	PUB1/pub1- SSD1/ssd1- 3n.Chr12	pub1	diploid
6129	37	1	pos25	WT	0	1	7	348	1.7	1.7.1	PUB1/pub1- SSD1/ssd1- 3n.Chr12	pub1	diploid
6130	37	1	pos26	WT	0	2	7	340	1.7	1.7.2	PUB1/pub1- SSD1/ssd1- 3n.Chr12	pub1	diploid
6131	37	1	pos27	ssd1_pub1	1	3	7	105	1.7	1.7.3	PUB1/pub1- SSD1/ssd1- 3n.Chr12	pub1	diploid
6132	37	1	pos28	ssd1_pub1	1	4	7	114	1.7	1.7.4	PUB1/pub1- SSD1/ssd1- 3n.Chr12	pub1	diploid
6137	37	2	pos1	ssd1_pub1	1	1	1	89	2.1	2.1.1	PUB1/pub1- SSD1/ssd1- 3n.Chr12	pub1	diploid
6138	37	2	pos2	WT	0	2	1	343	2.1	2.1.2	PUB1/pub1- SSD1/ssd1- 3n.Chr12	pub1	diploid
6139	37	2	pos3	ssd1	0	3	1	359	2.1	2.1.3	PUB1/pub1- SSD1/ssd1- 3n.Chr12	pub1	diploid
6140	37	2	pos4	pub1	1	4	1	320	2.1	2.1.4	PUB1/pub1- SSD1/ssd1- 3n.Chr12	pub1	diploid
6145	37	2	pos9	WT	0	1	3	337	2.3	2.3.1	PUB1/pub1- SSD1/ssd1- 3n.Chr12	pub1	diploid
6146	37	2	pos10	ssd1	0	2	3	371	2.3	2.3.2	PUB1/pub1- SSD1/ssd1- 3n.Chr12	pub1	diploid
6147	37	2	pos11	pub1	1	3	3	288	2.3	2.3.3	PUB1/pub1- SSD1/ssd1- 3n.Chr12	pub1	diploid
6148	37	2	pos12	ssd1_pub1	1	4	3	119	2.3	2.3.4	PUB1/pub1- SSD1/ssd1- 3n.Chr12	pub1	diploid
6149	37	2	pos13	ssd1	0	1	4	366	2.4	2.4.1	PUB1/pub1- SSD1/ssd1- 3n.Chr12	pub1	diploid
6150	37	2	pos14	ssd1_pub1	1	2	4	92	2.4	2.4.2	PUB1/pub1- SSD1/ssd1- 3n.Chr12	pub1	diploid
6151	37	2	pos15	pub1	1	3	4	256	2.4	2.4.3	PUB1/pub1- SSD1/ssd1- 3n.Chr12	pub1	diploid
6152	37	2	pos16	WT	0	4	4	306	2.4	2.4.4	PUB1/pub1- SSD1/ssd1- 3n.Chr12	pub1	diploid
6153	37	2	pos17	WT	1	1	5	251	2.5	2.5.1	PUB1/pub1- SSD1/ssd1- 3n.Chr12	pub1	diploid
6154	37	2	pos18	pub1	0	2	5	246	2.5	2.5.2	PUB1/pub1- SSD1/ssd1- 3n.Chr12	pub1	diploid
6155	37	2	pos19	ssd1_pub1	0	3	5	298	2.5	2.5.3	PUB1/pub1- SSD1/ssd1- 3n.Chr12	pub1	diploid
6156	37	2	pos20	ssd1	1	4	5	66	2.5	2.5.4	PUB1/pub1- SSD1/ssd1- 3n.Chr12	pub1	diploid
6157	37	2	pos21	ssd1_pub1	0	1	6	304	2.6	2.6.1	PUB1/pub1- SSD1/ssd1- 3n.Chr12	pub1	diploid
6158	37	2	pos22	pub1	0	2	6	178	2.6	2.6.2	PUB1/pub1- SSD1/ssd1- 3n.Chr12	pub1	diploid
6159	37	2	pos23	WT	1	3	6	280	2.6	2.6.3	PUB1/pub1- SSD1/ssd1- 3n.Chr12	pub1	diploid
6160	37	2	pos24	ssd1	1	4	6	68	2.6	2.6.4	PUB1/pub1- SSD1/ssd1- 3n.Chr12	pub1	diploid
6161	37	2	pos25	ssd1	0	1	7	381	2.7	2.7.1	PUB1/pub1- SSD1/ssd1- 3n.Chr12	pub1	diploid
6162	37	2	pos26	pub1	0	2	7	249	2.7	2.7.2	PUB1/pub1- SSD1/ssd1- 3n.Chr12	pub1	diploid
6163	37	2	pos27	ssd1	1	3	7	77	2.7	2.7.3	PUB1/pub1- SSD1/ssd1- 3n.Chr12	pub1	diploid
6164	37	2	pos28	pub1	1	4	7	282	2.7	2.7.4	PUB1/pub1- SSD1/ssd1- 3n.Chr12	pub1	diploid
6165	37	2	pos29	pub1	1	1	8	296	2.8	2.8.1	PUB1/pub1- SSD1/ssd1- 3n.Chr12	pub1	diploid
6166	37	2	pos30	ssd1	0	2	8	382	2.8	2.8.2	PUB1/pub1- SSD1/ssd1- 3n.Chr12	pub1	diploid
6167	37	2	pos31	WT	0	3	8	308	2.8	2.8.3	PUB1/pub1- SSD1/ssd1- 3n.Chr12	pub1	diploid
6168	37	2	pos32	ssd1_pub1	1	4	8	115	2.8	2.8.4	PUB1/pub1- SSD1/ssd1- 3n.Chr12	pub1	diploid
6173	37	3	pos5	ssd1_pub1	1	1	2	89	3.2	3.2.1	PUB1/pub1- SSD1/ssd1- 3n.Chr12	pub1	diploid
6174	37	3	pos6	WT	0	2	2	289	3.2	3.2.2	PUB1/pub1- SSD1/ssd1- 3n.Chr12	pub1	diploid
6175	37	3	pos7	ssd1	0	3	2	359	3.2	3.2.3	PUB1/pub1- SSD1/ssd1- 3n.Chr12	pub1	diploid
6176	37	3	pos8	pub1	1	4	2	299	3.2	3.2.4	PUB1/pub1- SSD1/ssd1- 3n.Chr12	pub1	diploid
6177	37	3	pos9	ssd1_pub1	1	1	3	103	3.3	3.3.1	PUB1/pub1- SSD1/ssd1- 3n.Chr12	pub1	diploid
6178	37	3	pos10	WT	0	2	3	332	3.3	3.3.2	PUB1/pub1- SSD1/ssd1- 3n.Chr12	pub1	diploid
6179	37	3	pos11	WT	0	3	3	333	3.3	3.3.3	PUB1/pub1- SSD1/ssd1- 3n.Chr12	pub1	diploid
6180	37	3	pos12	ssd1_pub1	1	4	3	113	3.3	3.3.4	PUB1/pub1- SSD1/ssd1- 3n.Chr12	pub1	diploid
6181	37	3	pos13	ssd1_pub1	0	1	4	320	3.4	3.4.1	PUB1/pub1- SSD1/ssd1- 3n.Chr12	pub1	diploid
6182	37	3	pos14	WT	1	2	4	267	3.4	3.4.2	PUB1/pub1- SSD1/ssd1- 3n.Chr12	pub1	diploid
6183	37	3	pos15	WT	1	3	4	282	3.4	3.4.3	PUB1/pub1- SSD1/ssd1- 3n.Chr12	pub1	diploid
6184	37	3	pos16	ssd1_pub1	0	4	4	346	3.4	3.4.4	PUB1/pub1- SSD1/ssd1- 3n.Chr12	pub1	diploid
6185	37	3	pos17	ssd1_pub1	1	1	5	107	3.5	3.5.1	PUB1/pub1- SSD1/ssd1- 3n.Chr12	pub1	diploid
6186	37	3	pos18	WT	0	2	5	304	3.5	3.5.2	PUB1/pub1- SSD1/ssd1- 3n.Chr12	pub1	diploid
6187	37	3	pos19	WT	0	3	5	268	3.5	3.5.3	PUB1/pub1- SSD1/ssd1- 3n.Chr12	pub1	diploid
6188	37	3	pos20	ssd1_pub1	1	4	5	106	3.5	3.5.4	PUB1/pub1- SSD1/ssd1- 3n.Chr12	pub1	diploid
6189	37	3	pos21	ssd1	0	1	6	419	3.6	3.6.1	PUB1/pub1- SSD1/ssd1- 3n.Chr12	pub1	diploid
6190	37	3	pos22	ssd1_pub1	1	2	6	96	3.6	3.6.2	PUB1/pub1- SSD1/ssd1- 3n.Chr12	pub1	diploid
6191	37	3	pos23	pub1	1	3	6	270	3.6	3.6.3	PUB1/pub1- SSD1/ssd1- 3n.Chr12	pub1	diploid
6192	37	3	pos24	WT	0	4	6	357	3.6	3.6.4	PUB1/pub1- SSD1/ssd1- 3n.Chr12	pub1	diploid
6193	37	3	pos25	ssd1_pub1	1	1	7	129	3.7	3.7.1	PUB1/pub1- SSD1/ssd1- 3n.Chr12	pub1	diploid
6194	37	3	pos26	WT	0	2	7	346	3.7	3.7.2	PUB1/pub1- SSD1/ssd1- 3n.Chr12	pub1	diploid
6195	37	3	pos27	pub1	1	3	7	220	3.7	3.7.3	PUB1/pub1- SSD1/ssd1- 3n.Chr12	pub1	diploid
6196	37	3	pos28	ssd1	0	4	7	405	3.7	3.7.4	PUB1/pub1- SSD1/ssd1- 3n.Chr12	pub1	diploid
6197	37	3	pos29	WT	0	1	8	362	3.8	3.8.1	PUB1/pub1- SSD1/ssd1- 3n.Chr12	pub1	diploid
6198	37	3	pos30	ssd1_pub1	1	2	8	100	3.8	3.8.2	PUB1/pub1- SSD1/ssd1- 3n.Chr12	pub1	diploid
6199	37	3	pos31	WT	0	3	8	368	3.8	3.8.3	PUB1/pub1- SSD1/ssd1- 3n.Chr12	pub1	diploid
6200	37	3	pos32	ssd1_pub1	1	4	8	126	3.8	3.8.4	PUB1/pub1- SSD1/ssd1- 3n.Chr12	pub1	diploid
6201	37	4	pos1	ssd1_pub1	0	1	1	278	4.1	4.1.1	PUB1/pub1- SSD1/ssd1- 3n.Chr12	pub1	diploid
6202	37	4	pos2	WT	1	2	1	302	4.1	4.1.2	PUB1/pub1- SSD1/ssd1- 3n.Chr12	pub1	diploid
6203	37	4	pos3	pub1	0	3	1	260	4.1	4.1.3	PUB1/pub1- SSD1/ssd1- 3n.Chr12	pub1	diploid
6204	37	4	pos4	ssd1	1	4	1	57	4.1	4.1.4	PUB1/pub1- SSD1/ssd1- 3n.Chr12	pub1	diploid
6205	37	4	pos5	ssd1_pub1	1	1	2	94	4.2	4.2.1	PUB1/pub1- SSD1/ssd1- 3n.Chr12	pub1	diploid
6206	37	4	pos6	ssd1	0	2	2	349	4.2	4.2.2	PUB1/pub1- SSD1/ssd1- 3n.Chr12	pub1	diploid
6207	37	4	pos7	pub1	1	3	2	259	4.2	4.2.3	PUB1/pub1- SSD1/ssd1- 3n.Chr12	pub1	diploid
6208	37	4	pos8	WT	0	4	2	341	4.2	4.2.4	PUB1/pub1- SSD1/ssd1- 3n.Chr12	pub1	diploid
6217	37	4	pos17	pub1	0	1	5	250	4.5	4.5.1	PUB1/pub1- SSD1/ssd1- 3n.Chr12	pub1	diploid
6218	37	4	pos18	WT	1	2	5	286	4.5	4.5.2	PUB1/pub1- SSD1/ssd1- 3n.Chr12	pub1	diploid
6219	37	4	pos19	ssd1	1	3	5	74	4.5	4.5.3	PUB1/pub1- SSD1/ssd1- 3n.Chr12	pub1	diploid
6220	37	4	pos20	ssd1_pub1	0	4	5	317	4.5	4.5.4	PUB1/pub1- SSD1/ssd1- 3n.Chr12	pub1	diploid
6221	37	4	pos21	WT	1	1	6	297	4.6	4.6.1	PUB1/pub1- SSD1/ssd1- 3n.Chr12	pub1	diploid
6222	37	4	pos22	ssd1_pub1	0	2	6	257	4.6	4.6.2	PUB1/pub1- SSD1/ssd1- 3n.Chr12	pub1	diploid
6223	37	4	pos23	ssd1_pub1	0	3	6	341	4.6	4.6.3	PUB1/pub1- SSD1/ssd1- 3n.Chr12	pub1	diploid
6224	37	4	pos24	WT	1	4	6	286	4.6	4.6.4	PUB1/pub1- SSD1/ssd1- 3n.Chr12	pub1	diploid
6229	37	4	pos29	ssd1	0	1	8	408	4.8	4.8.1	PUB1/pub1- SSD1/ssd1- 3n.Chr12	pub1	diploid
6230	37	4	pos30	ssd1_pub1	1	2	8	127	4.8	4.8.2	PUB1/pub1- SSD1/ssd1- 3n.Chr12	pub1	diploid
6231	37	4	pos31	WT	0	3	8	309	4.8	4.8.3	PUB1/pub1- SSD1/ssd1- 3n.Chr12	pub1	diploid
6232	37	4	pos32	pub1	1	4	8	282	4.8	4.8.4	PUB1/pub1- SSD1/ssd1- 3n.Chr12	pub1	diploid
6233	37	5	pos1	WT	0	1	1	376	5.1	5.1.1	PUB1/pub1- SSD1/ssd1- 3n.Chr12	pub1	diploid
6234	37	5	pos2	ssd1_pub1	1	2	1	102	5.1	5.1.2	PUB1/pub1- SSD1/ssd1- 3n.Chr12	pub1	diploid
6235	37	5	pos3	ssd1	0	3	1	407	5.1	5.1.3	PUB1/pub1- SSD1/ssd1- 3n.Chr12	pub1	diploid
6236	37	5	pos4	pub1	1	4	1	312	5.1	5.1.4	PUB1/pub1- SSD1/ssd1- 3n.Chr12	pub1	diploid
6241	37	5	pos9	pub1	0	1	3	212	5.3	5.3.1	PUB1/pub1- SSD1/ssd1- 3n.Chr12	pub1	diploid
6242	37	5	pos10	ssd1	1	2	3	55	5.3	5.3.2	PUB1/pub1- SSD1/ssd1- 3n.Chr12	pub1	diploid
6243	37	5	pos11	pub1	0	3	3	283	5.3	5.3.3	PUB1/pub1- SSD1/ssd1- 3n.Chr12	pub1	diploid
6244	37	5	pos12	ssd1	1	4	3	113	5.3	5.3.4	PUB1/pub1- SSD1/ssd1- 3n.Chr12	pub1	diploid
6245	37	5	pos13	ssd1_pub1	0	1	4	364	5.4	5.4.1	PUB1/pub1- SSD1/ssd1- 3n.Chr12	pub1	diploid
6246	37	5	pos14	WT	1	2	4	280	5.4	5.4.2	PUB1/pub1- SSD1/ssd1- 3n.Chr12	pub1	diploid
6247	37	5	pos15	ssd1_pub1	0	3	4	310	5.4	5.4.3	PUB1/pub1- SSD1/ssd1- 3n.Chr12	pub1	diploid
6248	37	5	pos16	WT	1	4	4	337	5.4	5.4.4	PUB1/pub1- SSD1/ssd1- 3n.Chr12	pub1	diploid
6249	37	5	pos17	ssd1_pub1	0	1	5	336	5.5	5.5.1	PUB1/pub1- SSD1/ssd1- 3n.Chr12	pub1	diploid
6250	37	5	pos18	WT	1	2	5	273	5.5	5.5.2	PUB1/pub1- SSD1/ssd1- 3n.Chr12	pub1	diploid
6251	37	5	pos19	pub1	0	3	5	282	5.5	5.5.3	PUB1/pub1- SSD1/ssd1- 3n.Chr12	pub1	diploid
6252	37	5	pos20	ssd1	1	4	5	61	5.5	5.5.4	PUB1/pub1- SSD1/ssd1- 3n.Chr12	pub1	diploid
6253	37	5	pos21	ssd1	1	1	6	87	5.6	5.6.1	PUB1/pub1- SSD1/ssd1- 3n.Chr12	pub1	diploid
6254	37	5	pos22	WT	1	2	6	276	5.6	5.6.2	PUB1/pub1- SSD1/ssd1- 3n.Chr12	pub1	diploid
6255	37	5	pos23	pub1	0	3	6	267	5.6	5.6.3	PUB1/pub1- SSD1/ssd1- 3n.Chr12	pub1	diploid
6256	37	5	pos24	ssd1_pub1	0	4	6	336	5.6	5.6.4	PUB1/pub1- SSD1/ssd1- 3n.Chr12	pub1	diploid
6257	37	5	pos25	WT	1	1	7	309	5.7	5.7.1	PUB1/pub1- SSD1/ssd1- 3n.Chr12	pub1	diploid
6258	37	5	pos26	WT	0	2	7	343	5.7	5.7.2	PUB1/pub1- SSD1/ssd1- 3n.Chr12	pub1	diploid
6259	37	5	pos27	ssd1_pub1	1	3	7	95	5.7	5.7.3	PUB1/pub1- SSD1/ssd1- 3n.Chr12	pub1	diploid
6260	37	5	pos28	ssd1_pub1	0	4	7	340	5.7	5.7.4	PUB1/pub1- SSD1/ssd1- 3n.Chr12	pub1	diploid
6261	37	5	pos29	WT	0	1	8	387	5.8	5.8.1	PUB1/pub1- SSD1/ssd1- 3n.Chr12	pub1	diploid
6262	37	5	pos30	ssd1_pub1	1	2	8	102	5.8	5.8.2	PUB1/pub1- SSD1/ssd1- 3n.Chr12	pub1	diploid
6263	37	5	pos31	ssd1	0	3	8	382	5.8	5.8.3	PUB1/pub1- SSD1/ssd1- 3n.Chr12	pub1	diploid
6264	37	5	pos32	pub1	1	4	8	305	5.8	5.8.4	PUB1/pub1- SSD1/ssd1- 3n.Chr12	pub1	diploid
6265	37	6	pos1	ssd1_pub1	0	1	1	289	6.1	6.1.1	PUB1/pub1- SSD1/ssd1- 3n.Chr12	pub1	diploid
6266	37	6	pos2	pub1	0	2	1	283	6.1	6.1.2	PUB1/pub1- SSD1/ssd1- 3n.Chr12	pub1	diploid
6267	37	6	pos3	WT	1	3	1	306	6.1	6.1.3	PUB1/pub1- SSD1/ssd1- 3n.Chr12	pub1	diploid
6268	37	6	pos4	ssd1	1	4	1	77	6.1	6.1.4	PUB1/pub1- SSD1/ssd1- 3n.Chr12	pub1	diploid
6269	37	6	pos5	WT	1	1	2	251	6.2	6.2.1	PUB1/pub1- SSD1/ssd1- 3n.Chr12	pub1	diploid
6270	37	6	pos6	ssd1_pub1	1	2	2	89	6.2	6.2.2	PUB1/pub1- SSD1/ssd1- 3n.Chr12	pub1	diploid
6271	37	6	pos7	ssd1_pub1	0	3	2	324	6.2	6.2.3	PUB1/pub1- SSD1/ssd1- 3n.Chr12	pub1	diploid
6272	37	6	pos8	WT	0	4	2	366	6.2	6.2.4	PUB1/pub1- SSD1/ssd1- 3n.Chr12	pub1	diploid
6281	37	6	pos17	ssd1_pub1	0	1	5	339	6.5	6.5.1	PUB1/pub1- SSD1/ssd1- 3n.Chr12	pub1	diploid
6282	37	6	pos18	WT	1	2	5	293	6.5	6.5.2	PUB1/pub1- SSD1/ssd1- 3n.Chr12	pub1	diploid
6283	37	6	pos19	pub1	1	3	5	273	6.5	6.5.3	PUB1/pub1- SSD1/ssd1- 3n.Chr12	pub1	diploid
6284	37	6	pos20	ssd1	0	4	5	358	6.5	6.5.4	PUB1/pub1- SSD1/ssd1- 3n.Chr12	pub1	diploid
6285	37	6	pos21	ssd1	1	1	6	80	6.6	6.6.1	PUB1/pub1- SSD1/ssd1- 3n.Chr12	pub1	diploid
6286	37	6	pos22	WT	1	2	6	292	6.6	6.6.2	PUB1/pub1- SSD1/ssd1- 3n.Chr12	pub1	diploid
6287	37	6	pos23	ssd1_pub1	0	3	6	289	6.6	6.6.3	PUB1/pub1- SSD1/ssd1- 3n.Chr12	pub1	diploid
6288	37	6	pos24	pub1	0	4	6	322	6.6	6.6.4	PUB1/pub1- SSD1/ssd1- 3n.Chr12	pub1	diploid
6289	37	6	pos25	ssd1	1	1	7	83	6.7	6.7.1	PUB1/pub1- SSD1/ssd1- 3n.Chr12	pub1	diploid
6290	37	6	pos26	ssd1_pub1	0	2	7	310	6.7	6.7.2	PUB1/pub1- SSD1/ssd1- 3n.Chr12	pub1	diploid
6291	37	6	pos27	WT	1	3	7	290	6.7	6.7.3	PUB1/pub1- SSD1/ssd1- 3n.Chr12	pub1	diploid
6292	37	6	pos28	pub1	0	4	7	319	6.7	6.7.4	PUB1/pub1- SSD1/ssd1- 3n.Chr12	pub1	diploid
6293	37	6	pos29	ssd1_pub1	1	1	8	124	6.8	6.8.1	PUB1/pub1- SSD1/ssd1- 3n.Chr12	pub1	diploid
6294	37	6	pos30	ssd1	0	2	8	382	6.8	6.8.2	PUB1/pub1- SSD1/ssd1- 3n.Chr12	pub1	diploid
6295	37	6	pos31	WT	0	3	8	380	6.8	6.8.3	PUB1/pub1- SSD1/ssd1- 3n.Chr12	pub1	diploid
6296	37	6	pos32	pub1	1	4	8	289	6.8	6.8.4	PUB1/pub1- SSD1/ssd1- 3n.Chr12	pub1	diploid
6581	45	1	pos1	WT	1	1	1	272	1.1	1.1.1	CCR4/ccr4- SSD1/ssd1- 3n.Chr12	ccr4	diploid
6582	45	1	pos2	ssd1_ccr4	0	2	1	179	1.1	1.1.2	CCR4/ccr4- SSD1/ssd1- 3n.Chr12	ccr4	diploid
6583	45	1	pos3	ssd1	1	3	1	76	1.1	1.1.3	CCR4/ccr4- SSD1/ssd1- 3n.Chr12	ccr4	diploid
6584	45	1	pos4	ccr4	0	4	1	133	1.1	1.1.4	CCR4/ccr4- SSD1/ssd1- 3n.Chr12	ccr4	diploid
6585	45	1	pos5	WT	1	1	2	241	1.2	1.2.1	CCR4/ccr4- SSD1/ssd1- 3n.Chr12	ccr4	diploid
6586	45	1	pos6	ssd1_ccr4	0	2	2	186	1.2	1.2.2	CCR4/ccr4- SSD1/ssd1- 3n.Chr12	ccr4	diploid
6587	45	1	pos7	WT	1	3	2	283	1.2	1.2.3	CCR4/ccr4- SSD1/ssd1- 3n.Chr12	ccr4	diploid
6588	45	1	pos8	ssd1_ccr4	0	4	2	218	1.2	1.2.4	CCR4/ccr4- SSD1/ssd1- 3n.Chr12	ccr4	diploid
6593	45	1	pos13	WT	0	1	4	317	1.4	1.4.1	CCR4/ccr4- SSD1/ssd1- 3n.Chr12	ccr4	diploid
6594	45	1	pos14	ssd1_ccr4	1	2	4	71	1.4	1.4.2	CCR4/ccr4- SSD1/ssd1- 3n.Chr12	ccr4	diploid
6595	45	1	pos15	ssd1_ccr4	1	3	4	59	1.4	1.4.3	CCR4/ccr4- SSD1/ssd1- 3n.Chr12	ccr4	diploid
6596	45	1	pos16	WT	0	4	4	324	1.4	1.4.4	CCR4/ccr4- SSD1/ssd1- 3n.Chr12	ccr4	diploid
6597	45	1	pos17	ssd1	1	1	5	77	1.5	1.5.1	CCR4/ccr4- SSD1/ssd1- 3n.Chr12	ccr4	diploid
6598	45	1	pos18	ccr4	1	2	5	166	1.5	1.5.2	CCR4/ccr4- SSD1/ssd1- 3n.Chr12	ccr4	diploid
6599	45	1	pos19	WT	0	3	5	308	1.5	1.5.3	CCR4/ccr4- SSD1/ssd1- 3n.Chr12	ccr4	diploid
6600	45	1	pos20	ssd1_ccr4	0	4	5	210	1.5	1.5.4	CCR4/ccr4- SSD1/ssd1- 3n.Chr12	ccr4	diploid
6601	45	1	pos21	ssd1_ccr4	1	1	6	74	1.6	1.6.1	CCR4/ccr4- SSD1/ssd1- 3n.Chr12	ccr4	diploid
6602	45	1	pos22	ssd1	0	2	6	317	1.6	1.6.2	CCR4/ccr4- SSD1/ssd1- 3n.Chr12	ccr4	diploid
6603	45	1	pos23	WT	0	3	6	293	1.6	1.6.3	CCR4/ccr4- SSD1/ssd1- 3n.Chr12	ccr4	diploid
6604	45	1	pos24	ccr4	1	4	6	153	1.6	1.6.4	CCR4/ccr4- SSD1/ssd1- 3n.Chr12	ccr4	diploid
6605	45	1	pos25	ssd1_ccr4	1	1	7	74	1.7	1.7.1	CCR4/ccr4- SSD1/ssd1- 3n.Chr12	ccr4	diploid
6606	45	1	pos26	ccr4	0	2	7	162	1.7	1.7.2	CCR4/ccr4- SSD1/ssd1- 3n.Chr12	ccr4	diploid
6607	45	1	pos27	WT	0	3	7	253	1.7	1.7.3	CCR4/ccr4- SSD1/ssd1- 3n.Chr12	ccr4	diploid
6608	45	1	pos28	ssd1	1	4	7	75	1.7	1.7.4	CCR4/ccr4- SSD1/ssd1- 3n.Chr12	ccr4	diploid
6609	45	1	pos29	WT	0	1	8	314	1.8	1.8.1	CCR4/ccr4- SSD1/ssd1- 3n.Chr12	ccr4	diploid
6610	45	1	pos30	WT	1	2	8	259	1.8	1.8.2	CCR4/ccr4- SSD1/ssd1- 3n.Chr12	ccr4	diploid
6611	45	1	pos31	ssd1_ccr4	1	3	8	49	1.8	1.8.3	CCR4/ccr4- SSD1/ssd1- 3n.Chr12	ccr4	diploid
6612	45	1	pos32	ssd1_ccr4	0	4	8	187	1.8	1.8.4	CCR4/ccr4- SSD1/ssd1- 3n.Chr12	ccr4	diploid
6613	45	2	pos1	ssd1	0	1	1	277	2.1	2.1.1	CCR4/ccr4- SSD1/ssd1- 3n.Chr12	ccr4	diploid
6614	45	2	pos2	ccr4	1	2	1	112	2.1	2.1.2	CCR4/ccr4- SSD1/ssd1- 3n.Chr12	ccr4	diploid
6615	45	2	pos3	ssd1_ccr4	1	3	1	34	2.1	2.1.3	CCR4/ccr4- SSD1/ssd1- 3n.Chr12	ccr4	diploid
6616	45	2	pos4	WT	0	4	1	279	2.1	2.1.4	CCR4/ccr4- SSD1/ssd1- 3n.Chr12	ccr4	diploid
6617	45	2	pos5	ccr4	1	1	2	132	2.2	2.2.1	CCR4/ccr4- SSD1/ssd1- 3n.Chr12	ccr4	diploid
6618	45	2	pos6	WT	0	2	2	214	2.2	2.2.2	CCR4/ccr4- SSD1/ssd1- 3n.Chr12	ccr4	diploid
6619	45	2	pos7	ssd1	0	3	2	292	2.2	2.2.3	CCR4/ccr4- SSD1/ssd1- 3n.Chr12	ccr4	diploid
6620	45	2	pos8	ssd1_ccr4	1	4	2	40	2.2	2.2.4	CCR4/ccr4- SSD1/ssd1- 3n.Chr12	ccr4	diploid
6621	45	2	pos9	ssd1_ccr4	0	1	3	166	2.3	2.3.1	CCR4/ccr4- SSD1/ssd1- 3n.Chr12	ccr4	diploid
6622	45	2	pos10	WT	0	2	3	250	2.3	2.3.2	CCR4/ccr4- SSD1/ssd1- 3n.Chr12	ccr4	diploid
6623	45	2	pos11	WT	1	3	3	219	2.3	2.3.3	CCR4/ccr4- SSD1/ssd1- 3n.Chr12	ccr4	diploid
6624	45	2	pos12	ssd1_ccr4	1	4	3	54	2.3	2.3.4	CCR4/ccr4- SSD1/ssd1- 3n.Chr12	ccr4	diploid
6625	45	2	pos13	WT	1	1	4	192	2.4	2.4.1	CCR4/ccr4- SSD1/ssd1- 3n.Chr12	ccr4	diploid
6626	45	2	pos14	ssd1_ccr4	0	2	4	122	2.4	2.4.2	CCR4/ccr4- SSD1/ssd1- 3n.Chr12	ccr4	diploid
6627	45	2	pos15	WT	1	3	4	216	2.4	2.4.3	CCR4/ccr4- SSD1/ssd1- 3n.Chr12	ccr4	diploid
6628	45	2	pos16	ssd1_ccr4	0	4	4	121	2.4	2.4.4	CCR4/ccr4- SSD1/ssd1- 3n.Chr12	ccr4	diploid
6629	45	2	pos17	ssd1	0	1	5	302	2.5	2.5.1	CCR4/ccr4- SSD1/ssd1- 3n.Chr12	ccr4	diploid
6630	45	2	pos18	ssd1_ccr4	1	2	5	42	2.5	2.5.2	CCR4/ccr4- SSD1/ssd1- 3n.Chr12	ccr4	diploid
6631	45	2	pos19	WT	0	3	5	239	2.5	2.5.3	CCR4/ccr4- SSD1/ssd1- 3n.Chr12	ccr4	diploid
6632	45	2	pos20	ccr4	1	4	5	159	2.5	2.5.4	CCR4/ccr4- SSD1/ssd1- 3n.Chr12	ccr4	diploid
6633	45	2	pos21	ssd1	1	1	6	87	2.6	2.6.1	CCR4/ccr4- SSD1/ssd1- 3n.Chr12	ccr4	diploid
6634	45	2	pos22	WT	1	2	6	202	2.6	2.6.2	CCR4/ccr4- SSD1/ssd1- 3n.Chr12	ccr4	diploid
6635	45	2	pos23	ssd1_ccr4	0	3	6	120	2.6	2.6.3	CCR4/ccr4- SSD1/ssd1- 3n.Chr12	ccr4	diploid
6636	45	2	pos24	ccr4	0	4	6	158	2.6	2.6.4	CCR4/ccr4- SSD1/ssd1- 3n.Chr12	ccr4	diploid
6637	45	2	pos25	ssd1_ccr4	1	1	7	50	2.7	2.7.1	CCR4/ccr4- SSD1/ssd1- 3n.Chr12	ccr4	diploid
6638	45	2	pos26	WT	1	2	7	227	2.7	2.7.2	CCR4/ccr4- SSD1/ssd1- 3n.Chr12	ccr4	diploid
6639	45	2	pos27	ssd1_ccr4	0	3	7	135	2.7	2.7.3	CCR4/ccr4- SSD1/ssd1- 3n.Chr12	ccr4	diploid
6640	45	2	pos28	WT	0	4	7	267	2.7	2.7.4	CCR4/ccr4- SSD1/ssd1- 3n.Chr12	ccr4	diploid
6641	45	2	pos29	ssd1	0	1	8	305	2.8	2.8.1	CCR4/ccr4- SSD1/ssd1- 3n.Chr12	ccr4	diploid
6642	45	2	pos30	ssd1_ccr4	1	2	8	75	2.8	2.8.2	CCR4/ccr4- SSD1/ssd1- 3n.Chr12	ccr4	diploid
6643	45	2	pos31	ccr4	1	3	8	95	2.8	2.8.3	CCR4/ccr4- SSD1/ssd1- 3n.Chr12	ccr4	diploid
6644	45	2	pos32	WT	0	4	8	271	2.8	2.8.4	CCR4/ccr4- SSD1/ssd1- 3n.Chr12	ccr4	diploid
6645	45	3	pos1	ssd1_ccr4	1	1	1	54	3.1	3.1.1	CCR4/ccr4- SSD1/ssd1- 3n.Chr12	ccr4	diploid
6646	45	3	pos2	ccr4	1	2	1	129	3.1	3.1.2	CCR4/ccr4- SSD1/ssd1- 3n.Chr12	ccr4	diploid
6647	45	3	pos3	ssd1	0	3	1	292	3.1	3.1.3	CCR4/ccr4- SSD1/ssd1- 3n.Chr12	ccr4	diploid
6648	45	3	pos4	WT	0	4	1	288	3.1	3.1.4	CCR4/ccr4- SSD1/ssd1- 3n.Chr12	ccr4	diploid
6653	45	3	pos9	ccr4	1	1	3	156	3.3	3.3.1	CCR4/ccr4- SSD1/ssd1- 3n.Chr12	ccr4	diploid
6654	45	3	pos10	ccr4	1	2	3	130	3.3	3.3.2	CCR4/ccr4- SSD1/ssd1- 3n.Chr12	ccr4	diploid
6655	45	3	pos11	ssd1	0	3	3	258	3.3	3.3.3	CCR4/ccr4- SSD1/ssd1- 3n.Chr12	ccr4	diploid
6656	45	3	pos12	ssd1	0	4	3	263	3.3	3.3.4	CCR4/ccr4- SSD1/ssd1- 3n.Chr12	ccr4	diploid
6665	45	3	pos21	ssd1	0	1	6	261	3.6	3.6.1	CCR4/ccr4- SSD1/ssd1- 3n.Chr12	ccr4	diploid
6666	45	3	pos22	ccr4	1	2	6	159	3.6	3.6.2	CCR4/ccr4- SSD1/ssd1- 3n.Chr12	ccr4	diploid
6667	45	3	pos23	WT	1	3	6	257	3.6	3.6.3	CCR4/ccr4- SSD1/ssd1- 3n.Chr12	ccr4	diploid
6668	45	3	pos24	ssd1_ccr4	0	4	6	147	3.6	3.6.4	CCR4/ccr4- SSD1/ssd1- 3n.Chr12	ccr4	diploid
6669	45	3	pos25	ssd1	0	1	7	304	3.7	3.7.1	CCR4/ccr4- SSD1/ssd1- 3n.Chr12	ccr4	diploid
6670	45	3	pos26	WT	0	2	7	235	3.7	3.7.2	CCR4/ccr4- SSD1/ssd1- 3n.Chr12	ccr4	diploid
6671	45	3	pos27	ssd1_ccr4	1	3	7	54	3.7	3.7.3	CCR4/ccr4- SSD1/ssd1- 3n.Chr12	ccr4	diploid
6672	45	3	pos28	ccr4	1	4	7	114	3.7	3.7.4	CCR4/ccr4- SSD1/ssd1- 3n.Chr12	ccr4	diploid
6673	45	3	pos29	ssd1	1	1	8	96	3.8	3.8.1	CCR4/ccr4- SSD1/ssd1- 3n.Chr12	ccr4	diploid
6674	45	3	pos30	ccr4	1	2	8	135	3.8	3.8.2	CCR4/ccr4- SSD1/ssd1- 3n.Chr12	ccr4	diploid
6675	45	3	pos31	ssd1	0	3	8	289	3.8	3.8.3	CCR4/ccr4- SSD1/ssd1- 3n.Chr12	ccr4	diploid
6676	45	3	pos32	ccr4	0	4	8	123	3.8	3.8.4	CCR4/ccr4- SSD1/ssd1- 3n.Chr12	ccr4	diploid
7657	47	1	pos1	hek2	1	1	1	421	1.1	1.1.1	HEK2/hek2- SSD1/ssd1- 3n.Chr12	hek2	diploid
7658	47	1	pos2	ssd1_hek2	0	2	1	425	1.1	1.1.2	HEK2/hek2- SSD1/ssd1- 3n.Chr12	hek2	diploid
7659	47	1	pos3	WT	0	3	1	375	1.1	1.1.3	HEK2/hek2- SSD1/ssd1- 3n.Chr12	hek2	diploid
7660	47	1	pos4	ssd1	1	4	1	119	1.1	1.1.4	HEK2/hek2- SSD1/ssd1- 3n.Chr12	hek2	diploid
7661	47	1	pos5	WT	0	1	2	323	1.2	1.2.1	HEK2/hek2- SSD1/ssd1- 3n.Chr12	hek2	diploid
7662	47	1	pos6	ssd1_hek2	1	2	2	78	1.2	1.2.2	HEK2/hek2- SSD1/ssd1- 3n.Chr12	hek2	diploid
7663	47	1	pos7	hek2	1	3	2	349	1.2	1.2.3	HEK2/hek2- SSD1/ssd1- 3n.Chr12	hek2	diploid
7664	47	1	pos8	ssd1	0	4	2	394	1.2	1.2.4	HEK2/hek2- SSD1/ssd1- 3n.Chr12	hek2	diploid
7665	47	1	pos9	ssd1	0	1	3	367	1.3	1.3.1	HEK2/hek2- SSD1/ssd1- 3n.Chr12	hek2	diploid
7666	47	1	pos10	hek2	1	2	3	325	1.3	1.3.2	HEK2/hek2- SSD1/ssd1- 3n.Chr12	hek2	diploid
7667	47	1	pos11	WT	1	3	3	333	1.3	1.3.3	HEK2/hek2- SSD1/ssd1- 3n.Chr12	hek2	diploid
7668	47	1	pos12	ssd1_hek2	0	4	3	413	1.3	1.3.4	HEK2/hek2- SSD1/ssd1- 3n.Chr12	hek2	diploid
7669	47	1	pos13	hek2	1	1	4	320	1.4	1.4.1	HEK2/hek2- SSD1/ssd1- 3n.Chr12	hek2	diploid
7670	47	1	pos14	WT	0	2	4	379	1.4	1.4.2	HEK2/hek2- SSD1/ssd1- 3n.Chr12	hek2	diploid
7671	47	1	pos15	ssd1	1	3	4	110	1.4	1.4.3	HEK2/hek2- SSD1/ssd1- 3n.Chr12	hek2	diploid
7672	47	1	pos16	ssd1_hek2	0	4	4	417	1.4	1.4.4	HEK2/hek2- SSD1/ssd1- 3n.Chr12	hek2	diploid
7673	47	1	pos17	WT	1	1	5	331	1.5	1.5.1	HEK2/hek2- SSD1/ssd1- 3n.Chr12	hek2	diploid
7674	47	1	pos18	ssd1_hek2	1	2	5	96	1.5	1.5.2	HEK2/hek2- SSD1/ssd1- 3n.Chr12	hek2	diploid
7675	47	1	pos19	hek2	0	3	5	362	1.5	1.5.3	HEK2/hek2- SSD1/ssd1- 3n.Chr12	hek2	diploid
7676	47	1	pos20	ssd1	0	4	5	405	1.5	1.5.4	HEK2/hek2- SSD1/ssd1- 3n.Chr12	hek2	diploid
7677	47	1	pos21	ssd1	0	1	6	375	1.6	1.6.1	HEK2/hek2- SSD1/ssd1- 3n.Chr12	hek2	diploid
7678	47	1	pos22	ssd1	1	2	6	101	1.6	1.6.2	HEK2/hek2- SSD1/ssd1- 3n.Chr12	hek2	diploid
7679	47	1	pos23	hek2	0	3	6	365	1.6	1.6.3	HEK2/hek2- SSD1/ssd1- 3n.Chr12	hek2	diploid
7680	47	1	pos24	hek2	1	4	6	295	1.6	1.6.4	HEK2/hek2- SSD1/ssd1- 3n.Chr12	hek2	diploid
7681	47	1	pos25	ssd1_hek2	0	1	7	406	1.7	1.7.1	HEK2/hek2- SSD1/ssd1- 3n.Chr12	hek2	diploid
7682	47	1	pos26	WT	1	2	7	323	1.7	1.7.2	HEK2/hek2- SSD1/ssd1- 3n.Chr12	hek2	diploid
7683	47	1	pos27	ssd1_hek2	1	3	7	123	1.7	1.7.3	HEK2/hek2- SSD1/ssd1- 3n.Chr12	hek2	diploid
7684	47	1	pos28	WT	0	4	7	364	1.7	1.7.4	HEK2/hek2- SSD1/ssd1- 3n.Chr12	hek2	diploid
7685	47	1	pos29	hek2	1	1	8	331	1.8	1.8.1	HEK2/hek2- SSD1/ssd1- 3n.Chr12	hek2	diploid
7686	47	1	pos30	ssd1	0	2	8	418	1.8	1.8.2	HEK2/hek2- SSD1/ssd1- 3n.Chr12	hek2	diploid
7687	47	1	pos31	WT	0	3	8	425	1.8	1.8.3	HEK2/hek2- SSD1/ssd1- 3n.Chr12	hek2	diploid
7688	47	1	pos32	ssd1_hek2	1	4	8	165	1.8	1.8.4	HEK2/hek2- SSD1/ssd1- 3n.Chr12	hek2	diploid
7689	47	2	pos1	WT	0	1	1	315	2.1	2.1.1	HEK2/hek2- SSD1/ssd1- 3n.Chr12	hek2	diploid
7690	47	2	pos2	WT	0	2	1	297	2.1	2.1.2	HEK2/hek2- SSD1/ssd1- 3n.Chr12	hek2	diploid
7691	47	2	pos3	ssd1_hek2	1	3	1	137	2.1	2.1.3	HEK2/hek2- SSD1/ssd1- 3n.Chr12	hek2	diploid
7692	47	2	pos4	ssd1_hek2	1	4	1	131	2.1	2.1.4	HEK2/hek2- SSD1/ssd1- 3n.Chr12	hek2	diploid
7693	47	2	pos5	ssd1_hek2	1	1	2	106	2.2	2.2.1	HEK2/hek2- SSD1/ssd1- 3n.Chr12	hek2	diploid
7694	47	2	pos6	ssd1_hek2	1	2	2	109	2.2	2.2.2	HEK2/hek2- SSD1/ssd1- 3n.Chr12	hek2	diploid
7695	47	2	pos7	WT	0	3	2	315	2.2	2.2.3	HEK2/hek2- SSD1/ssd1- 3n.Chr12	hek2	diploid
7696	47	2	pos8	WT	0	4	2	334	2.2	2.2.4	HEK2/hek2- SSD1/ssd1- 3n.Chr12	hek2	diploid
7697	47	2	pos9	hek2	0	1	3	322	2.3	2.3.1	HEK2/hek2- SSD1/ssd1- 3n.Chr12	hek2	diploid
7698	47	2	pos10	ssd1_hek2	0	2	3	379	2.3	2.3.2	HEK2/hek2- SSD1/ssd1- 3n.Chr12	hek2	diploid
7699	47	2	pos11	ssd1	1	3	3	124	2.3	2.3.3	HEK2/hek2- SSD1/ssd1- 3n.Chr12	hek2	diploid
7700	47	2	pos12	WT	1	4	3	330	2.3	2.3.4	HEK2/hek2- SSD1/ssd1- 3n.Chr12	hek2	diploid
7701	47	2	pos13	hek2	0	1	4	333	2.4	2.4.1	HEK2/hek2- SSD1/ssd1- 3n.Chr12	hek2	diploid
7702	47	2	pos14	ssd1_hek2	0	2	4	289	2.4	2.4.2	HEK2/hek2- SSD1/ssd1- 3n.Chr12	hek2	diploid
7703	47	2	pos15	ssd1	1	3	4	121	2.4	2.4.3	HEK2/hek2- SSD1/ssd1- 3n.Chr12	hek2	diploid
7704	47	2	pos16	WT	1	4	4	327	2.4	2.4.4	HEK2/hek2- SSD1/ssd1- 3n.Chr12	hek2	diploid
7705	47	2	pos17	ssd1	0	1	5	322	2.5	2.5.1	HEK2/hek2- SSD1/ssd1- 3n.Chr12	hek2	diploid
7706	47	2	pos18	ssd1_hek2	1	2	5	81	2.5	2.5.2	HEK2/hek2- SSD1/ssd1- 3n.Chr12	hek2	diploid
7707	47	2	pos19	WT	1	3	5	287	2.5	2.5.3	HEK2/hek2- SSD1/ssd1- 3n.Chr12	hek2	diploid
7708	47	2	pos20	hek2	0	4	5	366	2.5	2.5.4	HEK2/hek2- SSD1/ssd1- 3n.Chr12	hek2	diploid
7713	47	2	pos25	hek2	1	1	7	330	2.7	2.7.1	HEK2/hek2- SSD1/ssd1- 3n.Chr12	hek2	diploid
7714	47	2	pos26	ssd1	1	2	7	94	2.7	2.7.2	HEK2/hek2- SSD1/ssd1- 3n.Chr12	hek2	diploid
7715	47	2	pos27	ssd1	0	3	7	359	2.7	2.7.3	HEK2/hek2- SSD1/ssd1- 3n.Chr12	hek2	diploid
7716	47	2	pos28	hek2	0	4	7	358	2.7	2.7.4	HEK2/hek2- SSD1/ssd1- 3n.Chr12	hek2	diploid
7717	47	2	pos29	hek2	0	1	8	359	2.8	2.8.1	HEK2/hek2- SSD1/ssd1- 3n.Chr12	hek2	diploid
7718	47	2	pos30	ssd1_hek2	1	2	8	122	2.8	2.8.2	HEK2/hek2- SSD1/ssd1- 3n.Chr12	hek2	diploid
7719	47	2	pos31	ssd1	0	3	8	360	2.8	2.8.3	HEK2/hek2- SSD1/ssd1- 3n.Chr12	hek2	diploid
7720	47	2	pos32	WT	1	4	8	326	2.8	2.8.4	HEK2/hek2- SSD1/ssd1- 3n.Chr12	hek2	diploid
7721	47	3	pos1	ssd1_hek2	1	1	1	103	3.1	3.1.1	HEK2/hek2- SSD1/ssd1- 3n.Chr12	hek2	diploid
7722	47	3	pos2	hek2	1	2	1	334	3.1	3.1.2	HEK2/hek2- SSD1/ssd1- 3n.Chr12	hek2	diploid
7723	47	3	pos3	ssd1	0	3	1	372	3.1	3.1.3	HEK2/hek2- SSD1/ssd1- 3n.Chr12	hek2	diploid
7724	47	3	pos4	WT	0	4	1	370	3.1	3.1.4	HEK2/hek2- SSD1/ssd1- 3n.Chr12	hek2	diploid
7725	47	3	pos5	hek2	1	1	2	256	3.2	3.2.1	HEK2/hek2- SSD1/ssd1- 3n.Chr12	hek2	diploid
7726	47	3	pos6	hek2	0	2	2	255	3.2	3.2.2	HEK2/hek2- SSD1/ssd1- 3n.Chr12	hek2	diploid
7727	47	3	pos7	ssd1	1	3	2	78	3.2	3.2.3	HEK2/hek2- SSD1/ssd1- 3n.Chr12	hek2	diploid
7728	47	3	pos8	ssd1	0	4	2	344	3.2	3.2.4	HEK2/hek2- SSD1/ssd1- 3n.Chr12	hek2	diploid
7729	47	3	pos9	ssd1_hek2	1	1	3	102	3.3	3.3.1	HEK2/hek2- SSD1/ssd1- 3n.Chr12	hek2	diploid
7730	47	3	pos10	ssd1	0	2	3	343	3.3	3.3.2	HEK2/hek2- SSD1/ssd1- 3n.Chr12	hek2	diploid
7731	47	3	pos11	hek2	1	3	3	290	3.3	3.3.3	HEK2/hek2- SSD1/ssd1- 3n.Chr12	hek2	diploid
7732	47	3	pos12	WT	0	4	3	344	3.3	3.3.4	HEK2/hek2- SSD1/ssd1- 3n.Chr12	hek2	diploid
7733	47	3	pos13	ssd1	0	1	4	326	3.4	3.4.1	HEK2/hek2- SSD1/ssd1- 3n.Chr12	hek2	diploid
7734	47	3	pos14	hek2	1	2	4	265	3.4	3.4.2	HEK2/hek2- SSD1/ssd1- 3n.Chr12	hek2	diploid
7735	47	3	pos15	hek2	1	3	4	273	3.4	3.4.3	HEK2/hek2- SSD1/ssd1- 3n.Chr12	hek2	diploid
7736	47	3	pos16	ssd1	0	4	4	365	3.4	3.4.4	HEK2/hek2- SSD1/ssd1- 3n.Chr12	hek2	diploid
7737	47	3	pos17	ssd1_hek2	0	1	5	362	3.5	3.5.1	HEK2/hek2- SSD1/ssd1- 3n.Chr12	hek2	diploid
7738	47	3	pos18	ssd1	0	2	5	342	3.5	3.5.2	HEK2/hek2- SSD1/ssd1- 3n.Chr12	hek2	diploid
7739	47	3	pos19	hek2	1	3	5	271	3.5	3.5.3	HEK2/hek2- SSD1/ssd1- 3n.Chr12	hek2	diploid
7740	47	3	pos20	WT	1	4	5	291	3.5	3.5.4	HEK2/hek2- SSD1/ssd1- 3n.Chr12	hek2	diploid
7741	47	3	pos21	WT	1	1	6	307	3.6	3.6.1	HEK2/hek2- SSD1/ssd1- 3n.Chr12	hek2	diploid
7742	47	3	pos22	ssd1_hek2	1	2	6	109	3.6	3.6.2	HEK2/hek2- SSD1/ssd1- 3n.Chr12	hek2	diploid
7743	47	3	pos23	WT	0	3	6	322	3.6	3.6.3	HEK2/hek2- SSD1/ssd1- 3n.Chr12	hek2	diploid
7744	47	3	pos24	ssd1_hek2	0	4	6	409	3.6	3.6.4	HEK2/hek2- SSD1/ssd1- 3n.Chr12	hek2	diploid
7749	47	3	pos29	WT	1	1	8	348	3.8	3.8.1	HEK2/hek2- SSD1/ssd1- 3n.Chr12	hek2	diploid
7750	47	3	pos30	ssd1	1	2	8	125	3.8	3.8.2	HEK2/hek2- SSD1/ssd1- 3n.Chr12	hek2	diploid
7751	47	3	pos31	ssd1_hek2	0	3	8	448	3.8	3.8.3	HEK2/hek2- SSD1/ssd1- 3n.Chr12	hek2	diploid
7752	47	3	pos32	hek2	0	4	8	364	3.8	3.8.4	HEK2/hek2- SSD1/ssd1- 3n.Chr12	hek2	diploid
7753	48	1	pos1	ssd1	0	1	1	352	1.1	1.1.1	ISW1/isw1- SSD1/ssd1- 3n.Chr12	isw1	diploid
7754	48	1	pos2	isw1	1	2	1	324	1.1	1.1.2	ISW1/isw1- SSD1/ssd1- 3n.Chr12	isw1	diploid
7755	48	1	pos3	ssd1	0	3	1	393	1.1	1.1.3	ISW1/isw1- SSD1/ssd1- 3n.Chr12	isw1	diploid
7756	48	1	pos4	isw1	1	4	1	338	1.1	1.1.4	ISW1/isw1- SSD1/ssd1- 3n.Chr12	isw1	diploid
7757	48	1	pos5	ssd1	0	1	2	337	1.2	1.2.1	ISW1/isw1- SSD1/ssd1- 3n.Chr12	isw1	diploid
7758	48	1	pos6	ssd1_isw1	1	2	2	41	1.2	1.2.2	ISW1/isw1- SSD1/ssd1- 3n.Chr12	isw1	diploid
7759	48	1	pos7	WT	0	3	2	345	1.2	1.2.3	ISW1/isw1- SSD1/ssd1- 3n.Chr12	isw1	diploid
7760	48	1	pos8	isw1	1	4	2	301	1.2	1.2.4	ISW1/isw1- SSD1/ssd1- 3n.Chr12	isw1	diploid
7761	48	1	pos9	ssd1	1	1	3	80	1.3	1.3.1	ISW1/isw1- SSD1/ssd1- 3n.Chr12	isw1	diploid
7762	48	1	pos10	isw1	1	2	3	289	1.3	1.3.2	ISW1/isw1- SSD1/ssd1- 3n.Chr12	isw1	diploid
7763	48	1	pos11	ssd1_isw1	0	3	3	260	1.3	1.3.3	ISW1/isw1- SSD1/ssd1- 3n.Chr12	isw1	diploid
7764	48	1	pos12	WT	0	4	3	360	1.3	1.3.4	ISW1/isw1- SSD1/ssd1- 3n.Chr12	isw1	diploid
7765	48	1	pos13	isw1	0	1	4	345	1.4	1.4.1	ISW1/isw1- SSD1/ssd1- 3n.Chr12	isw1	diploid
7766	48	1	pos14	ssd1	1	2	4	86	1.4	1.4.2	ISW1/isw1- SSD1/ssd1- 3n.Chr12	isw1	diploid
7767	48	1	pos15	ssd1	0	3	4	364	1.4	1.4.3	ISW1/isw1- SSD1/ssd1- 3n.Chr12	isw1	diploid
7768	48	1	pos16	isw1	1	4	4	325	1.4	1.4.4	ISW1/isw1- SSD1/ssd1- 3n.Chr12	isw1	diploid
7769	48	1	pos17	ssd1	0	1	5	391	1.5	1.5.1	ISW1/isw1- SSD1/ssd1- 3n.Chr12	isw1	diploid
7770	48	1	pos18	isw1	1	2	5	286	1.5	1.5.2	ISW1/isw1- SSD1/ssd1- 3n.Chr12	isw1	diploid
7771	48	1	pos19	ssd1	1	3	5	81	1.5	1.5.3	ISW1/isw1- SSD1/ssd1- 3n.Chr12	isw1	diploid
7772	48	1	pos20	isw1	0	4	5	406	1.5	1.5.4	ISW1/isw1- SSD1/ssd1- 3n.Chr12	isw1	diploid
7773	48	1	pos21	WT	0	1	6	349	1.6	1.6.1	ISW1/isw1- SSD1/ssd1- 3n.Chr12	isw1	diploid
7774	48	1	pos22	ssd1_isw1	0	2	6	285	1.6	1.6.2	ISW1/isw1- SSD1/ssd1- 3n.Chr12	isw1	diploid
7775	48	1	pos23	isw1	1	3	6	312	1.6	1.6.3	ISW1/isw1- SSD1/ssd1- 3n.Chr12	isw1	diploid
7776	48	1	pos24	ssd1	1	4	6	61	1.6	1.6.4	ISW1/isw1- SSD1/ssd1- 3n.Chr12	isw1	diploid
7777	48	1	pos29	WT	1	1	8	364	1.8	1.8.1	ISW1/isw1- SSD1/ssd1- 3n.Chr12	isw1	diploid
7778	48	1	pos30	WT	0	2	8	389	1.8	1.8.2	ISW1/isw1- SSD1/ssd1- 3n.Chr12	isw1	diploid
7779	48	1	pos31	ssd1_isw1	0	3	8	316	1.8	1.8.3	ISW1/isw1- SSD1/ssd1- 3n.Chr12	isw1	diploid
7780	48	1	pos32	ssd1_isw1	1	4	8	99	1.8	1.8.4	ISW1/isw1- SSD1/ssd1- 3n.Chr12	isw1	diploid
7781	48	2	pos1	ssd1_isw1	1	1	1	89	2.1	2.1.1	ISW1/isw1- SSD1/ssd1- 3n.Chr12	isw1	diploid
7782	48	2	pos2	ssd1	0	2	1	392	2.1	2.1.2	ISW1/isw1- SSD1/ssd1- 3n.Chr12	isw1	diploid
7783	48	2	pos3	isw1	1	3	1	302	2.1	2.1.3	ISW1/isw1- SSD1/ssd1- 3n.Chr12	isw1	diploid
7784	48	2	pos4	WT	0	4	1	378	2.1	2.1.4	ISW1/isw1- SSD1/ssd1- 3n.Chr12	isw1	diploid
7785	48	2	pos5	isw1	1	1	2	318	2.2	2.2.1	ISW1/isw1- SSD1/ssd1- 3n.Chr12	isw1	diploid
7786	48	2	pos6	ssd1_isw1	0	2	2	329	2.2	2.2.2	ISW1/isw1- SSD1/ssd1- 3n.Chr12	isw1	diploid
7787	48	2	pos7	WT	0	3	2	339	2.2	2.2.3	ISW1/isw1- SSD1/ssd1- 3n.Chr12	isw1	diploid
7788	48	2	pos8	ssd1	1	4	2	93	2.2	2.2.4	ISW1/isw1- SSD1/ssd1- 3n.Chr12	isw1	diploid
7793	48	2	pos13	ssd1	0	1	4	427	2.4	2.4.1	ISW1/isw1- SSD1/ssd1- 3n.Chr12	isw1	diploid
7794	48	2	pos14	ssd1_isw1	1	2	4	77	2.4	2.4.2	ISW1/isw1- SSD1/ssd1- 3n.Chr12	isw1	diploid
7795	48	2	pos15	WT	1	3	4	330	2.4	2.4.3	ISW1/isw1- SSD1/ssd1- 3n.Chr12	isw1	diploid
7796	48	2	pos16	isw1	0	4	4	363	2.4	2.4.4	ISW1/isw1- SSD1/ssd1- 3n.Chr12	isw1	diploid
7797	48	2	pos17	WT	0	1	5	339	2.5	2.5.1	ISW1/isw1- SSD1/ssd1- 3n.Chr12	isw1	diploid
7798	48	2	pos18	ssd1	1	2	5	101	2.5	2.5.2	ISW1/isw1- SSD1/ssd1- 3n.Chr12	isw1	diploid
7799	48	2	pos19	isw1	1	3	5	312	2.5	2.5.3	ISW1/isw1- SSD1/ssd1- 3n.Chr12	isw1	diploid
7800	48	2	pos20	ssd1_isw1	0	4	5	349	2.5	2.5.4	ISW1/isw1- SSD1/ssd1- 3n.Chr12	isw1	diploid
7801	48	2	pos21	isw1	0	1	6	370	2.6	2.6.1	ISW1/isw1- SSD1/ssd1- 3n.Chr12	isw1	diploid
7802	48	2	pos22	ssd1_isw1	1	2	6	62	2.6	2.6.2	ISW1/isw1- SSD1/ssd1- 3n.Chr12	isw1	diploid
7803	48	2	pos23	ssd1	1	3	6	82	2.6	2.6.3	ISW1/isw1- SSD1/ssd1- 3n.Chr12	isw1	diploid
7804	48	2	pos24	WT	0	4	6	406	2.6	2.6.4	ISW1/isw1- SSD1/ssd1- 3n.Chr12	isw1	diploid
7805	48	2	pos25	WT	0	1	7	361	2.7	2.7.1	ISW1/isw1- SSD1/ssd1- 3n.Chr12	isw1	diploid
7806	48	2	pos26	WT	0	2	7	328	2.7	2.7.2	ISW1/isw1- SSD1/ssd1- 3n.Chr12	isw1	diploid
7807	48	2	pos27	ssd1_isw1	1	3	7	79	2.7	2.7.3	ISW1/isw1- SSD1/ssd1- 3n.Chr12	isw1	diploid
7808	48	2	pos28	ssd1_isw1	1	4	7	71	2.7	2.7.4	ISW1/isw1- SSD1/ssd1- 3n.Chr12	isw1	diploid
7809	48	2	pos29	ssd1	0	1	8	385	2.8	2.8.1	ISW1/isw1- SSD1/ssd1- 3n.Chr12	isw1	diploid
7810	48	2	pos30	isw1	1	2	8	242	2.8	2.8.2	ISW1/isw1- SSD1/ssd1- 3n.Chr12	isw1	diploid
7811	48	2	pos31	ssd1	0	3	8	383	2.8	2.8.3	ISW1/isw1- SSD1/ssd1- 3n.Chr12	isw1	diploid
7812	48	2	pos32	isw1	1	4	8	342	2.8	2.8.4	ISW1/isw1- SSD1/ssd1- 3n.Chr12	isw1	diploid
7813	48	3	pos1	WT	1	1	1	331	3.1	3.1.1	ISW1/isw1- SSD1/ssd1- 3n.Chr12	isw1	diploid
7814	48	3	pos2	ssd1	1	2	1	76	3.1	3.1.2	ISW1/isw1- SSD1/ssd1- 3n.Chr12	isw1	diploid
7815	48	3	pos3	isw1	0	3	1	356	3.1	3.1.3	ISW1/isw1- SSD1/ssd1- 3n.Chr12	isw1	diploid
7816	48	3	pos4	ssd1_isw1	0	4	1	316	3.1	3.1.4	ISW1/isw1- SSD1/ssd1- 3n.Chr12	isw1	diploid
7817	48	3	pos5	ssd1_isw1	1	1	2	76	3.2	3.2.1	ISW1/isw1- SSD1/ssd1- 3n.Chr12	isw1	diploid
7818	48	3	pos6	isw1	1	2	2	326	3.2	3.2.2	ISW1/isw1- SSD1/ssd1- 3n.Chr12	isw1	diploid
7819	48	3	pos7	ssd1	0	3	2	440	3.2	3.2.3	ISW1/isw1- SSD1/ssd1- 3n.Chr12	isw1	diploid
7820	48	3	pos8	WT	0	4	2	434	3.2	3.2.4	ISW1/isw1- SSD1/ssd1- 3n.Chr12	isw1	diploid
7821	48	3	pos9	ssd1_isw1	0	1	3	310	3.3	3.3.1	ISW1/isw1- SSD1/ssd1- 3n.Chr12	isw1	diploid
7822	48	3	pos10	WT	0	2	3	282	3.3	3.3.2	ISW1/isw1- SSD1/ssd1- 3n.Chr12	isw1	diploid
7823	48	3	pos11	WT	1	3	3	298	3.3	3.3.3	ISW1/isw1- SSD1/ssd1- 3n.Chr12	isw1	diploid
7824	48	3	pos12	ssd1_isw1	1	4	3	64	3.3	3.3.4	ISW1/isw1- SSD1/ssd1- 3n.Chr12	isw1	diploid
7825	48	3	pos17	ssd1	0	1	5	360	3.5	3.5.1	ISW1/isw1- SSD1/ssd1- 3n.Chr12	isw1	diploid
7826	48	3	pos18	WT	0	2	5	358	3.5	3.5.2	ISW1/isw1- SSD1/ssd1- 3n.Chr12	isw1	diploid
7827	48	3	pos19	ssd1_isw1	1	3	5	61	3.5	3.5.3	ISW1/isw1- SSD1/ssd1- 3n.Chr12	isw1	diploid
7828	48	3	pos20	isw1	1	4	5	331	3.5	3.5.4	ISW1/isw1- SSD1/ssd1- 3n.Chr12	isw1	diploid
7829	48	3	pos21	isw1	1	1	6	330	3.6	3.6.1	ISW1/isw1- SSD1/ssd1- 3n.Chr12	isw1	diploid
7830	48	3	pos22	ssd1	1	2	6	115	3.6	3.6.2	ISW1/isw1- SSD1/ssd1- 3n.Chr12	isw1	diploid
7831	48	3	pos23	isw1	0	3	6	372	3.6	3.6.3	ISW1/isw1- SSD1/ssd1- 3n.Chr12	isw1	diploid
7832	48	3	pos24	ssd1	0	4	6	408	3.6	3.6.4	ISW1/isw1- SSD1/ssd1- 3n.Chr12	isw1	diploid
7833	48	3	pos25	WT	0	1	7	351	3.7	3.7.1	ISW1/isw1- SSD1/ssd1- 3n.Chr12	isw1	diploid
7834	48	3	pos26	isw1	1	2	7	296	3.7	3.7.2	ISW1/isw1- SSD1/ssd1- 3n.Chr12	isw1	diploid
7835	48	3	pos27	ssd1_isw1	1	3	7	62	3.7	3.7.3	ISW1/isw1- SSD1/ssd1- 3n.Chr12	isw1	diploid
7836	48	3	pos28	ssd1	0	4	7	436	3.7	3.7.4	ISW1/isw1- SSD1/ssd1- 3n.Chr12	isw1	diploid
7837	46	1	pos9	dhh1	1	1	3	112	1.3	1.3.1	DHH1/dhh1- SSD1/ssd1- 3n.Chr12	dhh1	diploid
7838	46	1	pos10	ssd1_dhh1	0	2	3	107	1.3	1.3.2	DHH1/dhh1- SSD1/ssd1- 3n.Chr12	dhh1	diploid
7839	46	1	pos11	WT	0	3	3	295	1.3	1.3.3	DHH1/dhh1- SSD1/ssd1- 3n.Chr12	dhh1	diploid
7840	46	1	pos12	ssd1	1	4	3	69	1.3	1.3.4	DHH1/dhh1- SSD1/ssd1- 3n.Chr12	dhh1	diploid
7841	46	1	pos13	WT	1	1	4	235	1.4	1.4.1	DHH1/dhh1- SSD1/ssd1- 3n.Chr12	dhh1	diploid
7842	46	1	pos14	dhh1	1	2	4	105	1.4	1.4.2	DHH1/dhh1- SSD1/ssd1- 3n.Chr12	dhh1	diploid
7843	46	1	pos15	ssd1_dhh1	0	3	4	70	1.4	1.4.3	DHH1/dhh1- SSD1/ssd1- 3n.Chr12	dhh1	diploid
7844	46	1	pos16	ssd1	0	4	4	284	1.4	1.4.4	DHH1/dhh1- SSD1/ssd1- 3n.Chr12	dhh1	diploid
7845	46	1	pos17	ssd1_dhh1	0	1	5	72	1.5	1.5.1	DHH1/dhh1- SSD1/ssd1- 3n.Chr12	dhh1	diploid
7846	46	1	pos18	WT	1	2	5	226	1.5	1.5.2	DHH1/dhh1- SSD1/ssd1- 3n.Chr12	dhh1	diploid
7847	46	1	pos19	WT	0	3	5	260	1.5	1.5.3	DHH1/dhh1- SSD1/ssd1- 3n.Chr12	dhh1	diploid
7848	46	1	pos20	ssd1_dhh1	1	4	5	14	1.5	1.5.4	DHH1/dhh1- SSD1/ssd1- 3n.Chr12	dhh1	diploid
7849	46	1	pos21	dhh1	1	1	6	122	1.6	1.6.1	DHH1/dhh1- SSD1/ssd1- 3n.Chr12	dhh1	diploid
7850	46	1	pos22	ssd1	1	2	6	75	1.6	1.6.2	DHH1/dhh1- SSD1/ssd1- 3n.Chr12	dhh1	diploid
7851	46	1	pos23	ssd1	0	3	6	318	1.6	1.6.3	DHH1/dhh1- SSD1/ssd1- 3n.Chr12	dhh1	diploid
7852	46	1	pos24	dhh1	0	4	6	141	1.6	1.6.4	DHH1/dhh1- SSD1/ssd1- 3n.Chr12	dhh1	diploid
7853	46	1	pos25	ssd1	0	1	7	300	1.7	1.7.1	DHH1/dhh1- SSD1/ssd1- 3n.Chr12	dhh1	diploid
7854	46	1	pos26	WT	0	2	7	242	1.7	1.7.2	DHH1/dhh1- SSD1/ssd1- 3n.Chr12	dhh1	diploid
7855	46	1	pos27	dhh1	1	3	7	122	1.7	1.7.3	DHH1/dhh1- SSD1/ssd1- 3n.Chr12	dhh1	diploid
7856	46	1	pos28	ssd1_dhh1	1	4	7	23	1.7	1.7.4	DHH1/dhh1- SSD1/ssd1- 3n.Chr12	dhh1	diploid
7857	46	1	pos29	ssd1_dhh1	0	1	8	115	1.8	1.8.1	DHH1/dhh1- SSD1/ssd1- 3n.Chr12	dhh1	diploid
7858	46	1	pos30	dhh1	1	2	8	129	1.8	1.8.2	DHH1/dhh1- SSD1/ssd1- 3n.Chr12	dhh1	diploid
7859	46	1	pos31	ssd1	0	3	8	288	1.8	1.8.3	DHH1/dhh1- SSD1/ssd1- 3n.Chr12	dhh1	diploid
7860	46	1	pos32	WT	1	4	8	261	1.8	1.8.4	DHH1/dhh1- SSD1/ssd1- 3n.Chr12	dhh1	diploid
7861	46	2	pos1	dhh1	0	1	1	143	2.1	2.1.1	DHH1/dhh1- SSD1/ssd1- 3n.Chr12	dhh1	diploid
7862	46	2	pos2	ssd1_dhh1	0	2	1	125	2.1	2.1.2	DHH1/dhh1- SSD1/ssd1- 3n.Chr12	dhh1	diploid
7863	46	2	pos3	ssd1	1	3	1	107	2.1	2.1.3	DHH1/dhh1- SSD1/ssd1- 3n.Chr12	dhh1	diploid
7864	46	2	pos4	WT	1	4	1	256	2.1	2.1.4	DHH1/dhh1- SSD1/ssd1- 3n.Chr12	dhh1	diploid
7865	46	2	pos5	dhh1	1	1	2	130	2.2	2.2.1	DHH1/dhh1- SSD1/ssd1- 3n.Chr12	dhh1	diploid
7866	46	2	pos6	ssd1	0	2	2	312	2.2	2.2.2	DHH1/dhh1- SSD1/ssd1- 3n.Chr12	dhh1	diploid
7867	46	2	pos7	dhh1	0	3	2	155	2.2	2.2.3	DHH1/dhh1- SSD1/ssd1- 3n.Chr12	dhh1	diploid
7868	46	2	pos8	ssd1	1	4	2	43	2.2	2.2.4	DHH1/dhh1- SSD1/ssd1- 3n.Chr12	dhh1	diploid
7869	46	2	pos13	ssd1	0	1	4	293	2.4	2.4.1	DHH1/dhh1- SSD1/ssd1- 3n.Chr12	dhh1	diploid
7870	46	2	pos14	dhh1	0	2	4	173	2.4	2.4.2	DHH1/dhh1- SSD1/ssd1- 3n.Chr12	dhh1	diploid
7871	46	2	pos15	ssd1_dhh1	1	3	4	16	2.4	2.4.3	DHH1/dhh1- SSD1/ssd1- 3n.Chr12	dhh1	diploid
7872	46	2	pos16	WT	1	4	4	278	2.4	2.4.4	DHH1/dhh1- SSD1/ssd1- 3n.Chr12	dhh1	diploid
7873	46	2	pos17	ssd1_dhh1	0	1	5	108	2.5	2.5.1	DHH1/dhh1- SSD1/ssd1- 3n.Chr12	dhh1	diploid
7874	46	2	pos18	WT	0	2	5	301	2.5	2.5.2	DHH1/dhh1- SSD1/ssd1- 3n.Chr12	dhh1	diploid
7875	46	2	pos19	ssd1_dhh1	1	3	5	27	2.5	2.5.3	DHH1/dhh1- SSD1/ssd1- 3n.Chr12	dhh1	diploid
7876	46	2	pos20	WT	1	4	5	277	2.5	2.5.4	DHH1/dhh1- SSD1/ssd1- 3n.Chr12	dhh1	diploid
7881	46	2	pos29	WT	0	1	8	295	2.8	2.8.1	DHH1/dhh1- SSD1/ssd1- 3n.Chr12	dhh1	diploid
7882	46	2	pos30	dhh1	0	2	8	167	2.8	2.8.2	DHH1/dhh1- SSD1/ssd1- 3n.Chr12	dhh1	diploid
7883	46	2	pos31	ssd1_dhh1	1	3	8	41	2.8	2.8.3	DHH1/dhh1- SSD1/ssd1- 3n.Chr12	dhh1	diploid
7884	46	2	pos32	ssd1	1	4	8	108	2.8	2.8.4	DHH1/dhh1- SSD1/ssd1- 3n.Chr12	dhh1	diploid
8069	42	1	pos1	WT	0	1	1	250	1.1	1.1.1	MPT5/mpt5- SSD1/ssd1- 3n.Chr12	mpt5	diploid
8070	42	1	pos2	mpt5	1	2	1	262	1.1	1.1.2	MPT5/mpt5- SSD1/ssd1- 3n.Chr12	mpt5	diploid
8071	42	1	pos3	ssd1_mpt5	1	3	1	41	1.1	1.1.3	MPT5/mpt5- SSD1/ssd1- 3n.Chr12	mpt5	diploid
8072	42	1	pos4	ssd1	0	4	1	348	1.1	1.1.4	MPT5/mpt5- SSD1/ssd1- 3n.Chr12	mpt5	diploid
8081	42	1	pos13	mpt5	0	1	4	333	1.4	1.4.1	MPT5/mpt5- SSD1/ssd1- 3n.Chr12	mpt5	diploid
8082	42	1	pos14	mpt5	0	2	4	327	1.4	1.4.2	MPT5/mpt5- SSD1/ssd1- 3n.Chr12	mpt5	diploid
8083	42	1	pos15	ssd1	1	3	4	80	1.4	1.4.3	MPT5/mpt5- SSD1/ssd1- 3n.Chr12	mpt5	diploid
8084	42	1	pos16	ssd1	1	4	4	56	1.4	1.4.4	MPT5/mpt5- SSD1/ssd1- 3n.Chr12	mpt5	diploid
8085	42	1	pos17	WT	0	1	5	278	1.5	1.5.1	MPT5/mpt5- SSD1/ssd1- 3n.Chr12	mpt5	diploid
8086	42	1	pos18	ssd1_mpt5	1	2	5	28	1.5	1.5.2	MPT5/mpt5- SSD1/ssd1- 3n.Chr12	mpt5	diploid
8087	42	1	pos19	mpt5	1	3	5	259	1.5	1.5.3	MPT5/mpt5- SSD1/ssd1- 3n.Chr12	mpt5	diploid
8088	42	1	pos20	ssd1	0	4	5	309	1.5	1.5.4	MPT5/mpt5- SSD1/ssd1- 3n.Chr12	mpt5	diploid
8089	42	1	pos21	mpt5	0	1	6	345	1.6	1.6.1	MPT5/mpt5- SSD1/ssd1- 3n.Chr12	mpt5	diploid
8090	42	1	pos22	ssd1	0	2	6	299	1.6	1.6.2	MPT5/mpt5- SSD1/ssd1- 3n.Chr12	mpt5	diploid
8091	42	1	pos23	mpt5	1	3	6	250	1.6	1.6.3	MPT5/mpt5- SSD1/ssd1- 3n.Chr12	mpt5	diploid
8092	42	1	pos24	ssd1	1	4	6	106	1.6	1.6.4	MPT5/mpt5- SSD1/ssd1- 3n.Chr12	mpt5	diploid
8093	42	1	pos25	WT	1	1	7	256	1.7	1.7.1	MPT5/mpt5- SSD1/ssd1- 3n.Chr12	mpt5	diploid
8094	42	1	pos26	ssd1_mpt5	0	2	7	235	1.7	1.7.2	MPT5/mpt5- SSD1/ssd1- 3n.Chr12	mpt5	diploid
8095	42	1	pos27	ssd1	1	3	7	75	1.7	1.7.3	MPT5/mpt5- SSD1/ssd1- 3n.Chr12	mpt5	diploid
8096	42	1	pos28	mpt5	0	4	7	363	1.7	1.7.4	MPT5/mpt5- SSD1/ssd1- 3n.Chr12	mpt5	diploid
8097	42	1	pos29	ssd1	0	1	8	337	1.8	1.8.1	MPT5/mpt5- SSD1/ssd1- 3n.Chr12	mpt5	diploid
8098	42	1	pos30	mpt5	1	2	8	276	1.8	1.8.2	MPT5/mpt5- SSD1/ssd1- 3n.Chr12	mpt5	diploid
8099	42	1	pos31	ssd1	1	3	8	107	1.8	1.8.3	MPT5/mpt5- SSD1/ssd1- 3n.Chr12	mpt5	diploid
8100	42	1	pos32	mpt5	0	4	8	324	1.8	1.8.4	MPT5/mpt5- SSD1/ssd1- 3n.Chr12	mpt5	diploid
8101	42	2	pos1	ssd1_mpt5	0	1	1	257	2.1	2.1.1	MPT5/mpt5- SSD1/ssd1- 3n.Chr12	mpt5	diploid
8102	42	2	pos2	ssd1	1	2	1	80	2.1	2.1.2	MPT5/mpt5- SSD1/ssd1- 3n.Chr12	mpt5	diploid
8103	42	2	pos3	mpt5	1	3	1	275	2.1	2.1.3	MPT5/mpt5- SSD1/ssd1- 3n.Chr12	mpt5	diploid
8104	42	2	pos4	WT	0	4	1	280	2.1	2.1.4	MPT5/mpt5- SSD1/ssd1- 3n.Chr12	mpt5	diploid
8105	42	2	pos5	ssd1	0	1	2	331	2.2	2.2.1	MPT5/mpt5- SSD1/ssd1- 3n.Chr12	mpt5	diploid
8106	42	2	pos6	mpt5	0	2	2	338	2.2	2.2.2	MPT5/mpt5- SSD1/ssd1- 3n.Chr12	mpt5	diploid
8107	42	2	pos7	ssd1	1	3	2	72	2.2	2.2.3	MPT5/mpt5- SSD1/ssd1- 3n.Chr12	mpt5	diploid
8108	42	2	pos8	mpt5	1	4	2	274	2.2	2.2.4	MPT5/mpt5- SSD1/ssd1- 3n.Chr12	mpt5	diploid
8109	42	2	pos9	mpt5	0	1	3	344	2.3	2.3.1	MPT5/mpt5- SSD1/ssd1- 3n.Chr12	mpt5	diploid
8110	42	2	pos10	ssd1	0	2	3	309	2.3	2.3.2	MPT5/mpt5- SSD1/ssd1- 3n.Chr12	mpt5	diploid
8111	42	2	pos11	mpt5	1	3	3	262	2.3	2.3.3	MPT5/mpt5- SSD1/ssd1- 3n.Chr12	mpt5	diploid
8112	42	2	pos12	ssd1	1	4	3	93	2.3	2.3.4	MPT5/mpt5- SSD1/ssd1- 3n.Chr12	mpt5	diploid
8113	42	2	pos13	ssd1	1	1	4	83	2.4	2.4.1	MPT5/mpt5- SSD1/ssd1- 3n.Chr12	mpt5	diploid
8114	42	2	pos14	ssd1_mpt5	1	2	4	46	2.4	2.4.2	MPT5/mpt5- SSD1/ssd1- 3n.Chr12	mpt5	diploid
8115	42	2	pos15	mpt5	0	3	4	344	2.4	2.4.3	MPT5/mpt5- SSD1/ssd1- 3n.Chr12	mpt5	diploid
8116	42	2	pos16	WT	0	4	4	307	2.4	2.4.4	MPT5/mpt5- SSD1/ssd1- 3n.Chr12	mpt5	diploid
8121	42	2	pos21	mpt5	1	1	6	275	2.6	2.6.1	MPT5/mpt5- SSD1/ssd1- 3n.Chr12	mpt5	diploid
8122	42	2	pos22	WT	1	2	6	255	2.6	2.6.2	MPT5/mpt5- SSD1/ssd1- 3n.Chr12	mpt5	diploid
8123	42	2	pos23	ssd1	0	3	6	331	2.6	2.6.3	MPT5/mpt5- SSD1/ssd1- 3n.Chr12	mpt5	diploid
8124	42	2	pos24	ssd1_mpt5	0	4	6	273	2.6	2.6.4	MPT5/mpt5- SSD1/ssd1- 3n.Chr12	mpt5	diploid
8125	42	2	pos25	ssd1_mpt5	1	1	7	39	2.7	2.7.1	MPT5/mpt5- SSD1/ssd1- 3n.Chr12	mpt5	diploid
8126	42	2	pos26	WT	0	2	7	297	2.7	2.7.2	MPT5/mpt5- SSD1/ssd1- 3n.Chr12	mpt5	diploid
8127	42	2	pos27	WT	1	3	7	264	2.7	2.7.3	MPT5/mpt5- SSD1/ssd1- 3n.Chr12	mpt5	diploid
8128	42	2	pos28	ssd1_mpt5	0	4	7	279	2.7	2.7.4	MPT5/mpt5- SSD1/ssd1- 3n.Chr12	mpt5	diploid
8129	42	2	pos29	ssd1	0	1	8	319	2.8	2.8.1	MPT5/mpt5- SSD1/ssd1- 3n.Chr12	mpt5	diploid
8130	42	2	pos30	mpt5	1	2	8	268	2.8	2.8.2	MPT5/mpt5- SSD1/ssd1- 3n.Chr12	mpt5	diploid
8131	42	2	pos31	ssd1	0	3	8	325	2.8	2.8.3	MPT5/mpt5- SSD1/ssd1- 3n.Chr12	mpt5	diploid
8132	42	2	pos32	mpt5	1	4	8	271	2.8	2.8.4	MPT5/mpt5- SSD1/ssd1- 3n.Chr12	mpt5	diploid
8137	42	3	pos5	mpt5	1	1	2	258	3.2	3.2.1	MPT5/mpt5- SSD1/ssd1- 3n.Chr12	mpt5	diploid
8138	42	3	pos6	ssd1	0	2	2	303	3.2	3.2.2	MPT5/mpt5- SSD1/ssd1- 3n.Chr12	mpt5	diploid
8139	42	3	pos7	mpt5	0	3	2	324	3.2	3.2.3	MPT5/mpt5- SSD1/ssd1- 3n.Chr12	mpt5	diploid
8140	42	3	pos8	ssd1	1	4	2	115	3.2	3.2.4	MPT5/mpt5- SSD1/ssd1- 3n.Chr12	mpt5	diploid
8141	42	3	pos13	mpt5	1	1	4	263	3.4	3.4.1	MPT5/mpt5- SSD1/ssd1- 3n.Chr12	mpt5	diploid
8142	42	3	pos14	ssd1	1	2	4	61	3.4	3.4.2	MPT5/mpt5- SSD1/ssd1- 3n.Chr12	mpt5	diploid
8143	42	3	pos15	WT	0	3	4	292	3.4	3.4.3	MPT5/mpt5- SSD1/ssd1- 3n.Chr12	mpt5	diploid
8144	42	3	pos16	ssd1_mpt5	0	4	4	296	3.4	3.4.4	MPT5/mpt5- SSD1/ssd1- 3n.Chr12	mpt5	diploid
8149	42	3	pos21	ssd1_mpt5	0	1	6	229	3.6	3.6.1	MPT5/mpt5- SSD1/ssd1- 3n.Chr12	mpt5	diploid
8150	42	3	pos22	WT	0	2	6	277	3.6	3.6.2	MPT5/mpt5- SSD1/ssd1- 3n.Chr12	mpt5	diploid
8151	42	3	pos23	ssd1	1	3	6	79	3.6	3.6.3	MPT5/mpt5- SSD1/ssd1- 3n.Chr12	mpt5	diploid
8152	42	3	pos24	mpt5	1	4	6	262	3.6	3.6.4	MPT5/mpt5- SSD1/ssd1- 3n.Chr12	mpt5	diploid
8153	42	3	pos25	ssd1	1	1	7	109	3.7	3.7.1	MPT5/mpt5- SSD1/ssd1- 3n.Chr12	mpt5	diploid
8154	42	3	pos26	ssd1_mpt5	0	2	7	231	3.7	3.7.2	MPT5/mpt5- SSD1/ssd1- 3n.Chr12	mpt5	diploid
8155	42	3	pos27	WT	1	3	7	259	3.7	3.7.3	MPT5/mpt5- SSD1/ssd1- 3n.Chr12	mpt5	diploid
8156	42	3	pos28	mpt5	0	4	7	374	3.7	3.7.4	MPT5/mpt5- SSD1/ssd1- 3n.Chr12	mpt5	diploid
8161	53	1	pos1	gbp2	1	1	1	248	1.1	1.1.1	GBP2/gbp2- SSD1/ssd1- 3n.Chr12	gbp2	diploid
8162	53	1	pos2	gbp2	1	2	1	267	1.1	1.1.2	GBP2/gbp2- SSD1/ssd1- 3n.Chr12	gbp2	diploid
8163	53	1	pos3	ssd1	0	3	1	363	1.1	1.1.3	GBP2/gbp2- SSD1/ssd1- 3n.Chr12	gbp2	diploid
8164	53	1	pos4	ssd1	0	4	1	353	1.1	1.1.4	GBP2/gbp2- SSD1/ssd1- 3n.Chr12	gbp2	diploid
8165	53	1	pos5	gbp2	1	1	2	269	1.2	1.2.1	GBP2/gbp2- SSD1/ssd1- 3n.Chr12	gbp2	diploid
8166	53	1	pos6	ssd1	0	2	2	385	1.2	1.2.2	GBP2/gbp2- SSD1/ssd1- 3n.Chr12	gbp2	diploid
8167	53	1	pos7	ssd1_gbp2	1	3	2	89	1.2	1.2.3	GBP2/gbp2- SSD1/ssd1- 3n.Chr12	gbp2	diploid
8168	53	1	pos8	WT	0	4	2	342	1.2	1.2.4	GBP2/gbp2- SSD1/ssd1- 3n.Chr12	gbp2	diploid
8173	53	1	pos13	ssd1_gbp2	0	1	4	347	1.4	1.4.1	GBP2/gbp2- SSD1/ssd1- 3n.Chr12	gbp2	diploid
8174	53	1	pos14	WT	1	2	4	330	1.4	1.4.2	GBP2/gbp2- SSD1/ssd1- 3n.Chr12	gbp2	diploid
8175	53	1	pos15	ssd1	1	3	4	70	1.4	1.4.3	GBP2/gbp2- SSD1/ssd1- 3n.Chr12	gbp2	diploid
8176	53	1	pos16	gbp2	0	4	4	319	1.4	1.4.4	GBP2/gbp2- SSD1/ssd1- 3n.Chr12	gbp2	diploid
8177	53	1	pos17	ssd1_gbp2	1	1	5	93	1.5	1.5.1	GBP2/gbp2- SSD1/ssd1- 3n.Chr12	gbp2	diploid
8178	53	1	pos18	ssd1_gbp2	1	2	5	72	1.5	1.5.2	GBP2/gbp2- SSD1/ssd1- 3n.Chr12	gbp2	diploid
8179	53	1	pos19	WT	0	3	5	352	1.5	1.5.3	GBP2/gbp2- SSD1/ssd1- 3n.Chr12	gbp2	diploid
8180	53	1	pos20	WT	0	4	5	216	1.5	1.5.4	GBP2/gbp2- SSD1/ssd1- 3n.Chr12	gbp2	diploid
8181	53	1	pos21	WT	0	1	6	372	1.6	1.6.1	GBP2/gbp2- SSD1/ssd1- 3n.Chr12	gbp2	diploid
8182	53	1	pos22	ssd1	0	2	6	384	1.6	1.6.2	GBP2/gbp2- SSD1/ssd1- 3n.Chr12	gbp2	diploid
[truncated: 495 more rows]

## Sheet: 5. RBP colony size heatmap
# Table S5: RBP colony size heatmap
# Data corresponding to Figure 4B
# ssd1_aneu_vs_EXP_log2: log2(mean observed ssd1 aneuploid colony size/mean expected ssd1 aneuploid colony size)
# RBP_aneu_vs_EXP_log2: log2(mean observed rbp aneuploid colony size/mean expected rbp aneuploid colony size)
# ssd1_RBP_eu_VS_EXP_log2: log2(mean observed ssd1 rbp euploid colony size/mean expected ssd1 rbp euploid euploid colony size)
# ssd1_RBP_aneu_VS_EXP_log2: log2(mean observed ssd1 rbp aneuploid colony size/mean expected ssd1 rbp aneuploid colony size)
# log2 observed vs. expected colony sizes
query_mutant	ploidy	ssd1_aneu_vs_EXP_log2	RBP_aneu_vs_EXP_log2	ssd1_RBP_eu_VS_EXP_log2	ssd1_RBP_aneu_VS_EXP_log2
ccr4	diploid	-1.9505	0.0848811	0.0135377	0.546894
nab6	diploid	-2.0191	0.0941714	0.223112	0.92411
hek2	diploid	-1.92836	-0.0367125	0.0299679	0.236197
pub1	diploid	-2.01285	0.275936	0.0885733	0.600359
whi3	haploid	-1.30827	0.331103	-0.218417	0.440221
gbp2	diploid	-2.32073	-0.130374	-0.0999052	0.211346
mrn1	diploid	-2.20787	0.0234602	-0.0457913	-0.0225665
gis2	diploid	-2.06369	0.0895723	-0.137032	-0.0578947
isw1	diploid	-2.14315	-0.0835108	-0.309013	-0.132217
mpt5	diploid	-1.75282	-0.250879	-0.661451	-1.55778
puf6	diploid	-1.73463	-0.409251	-0.0948233	-0.331353
she2	haploid	-1.5651	-0.193574	0.0692491	-0.0886853
dhh1	diploid	-2.19667	-0.348979	-1.36613	-0.300875
pat1	diploid	-2.38442	-0.899162	-1.25161	-0.0532078
# p-values and FDR (B-H correction) from two-sided independent t-test
mutant	ploidy	genotype	p.value	fdr
ccr4	diploid	ssd1_aneu	4.73e-29	2.838e-28
ccr4	diploid	RBP_aneu	0.339494	0.400715
ccr4	diploid	ssd1_RBP_eu	0.896425	0.899766
ccr4	diploid	ssd1_RBP_aneu	1.16e-06	2.45647e-06
dhh1	diploid	ssd1_aneu	1.23e-20	4.428e-20
dhh1	diploid	RBP_aneu	0.0345846	0.0541324
dhh1	diploid	ssd1_RBP_eu	6.04e-10	1.49959e-09
dhh1	diploid	ssd1_RBP_aneu	0.151924	0.19533
gbp2	diploid	ssd1_aneu	1.16e-18	3.97714e-18
gbp2	diploid	RBP_aneu	0.048066	0.0720989
gbp2	diploid	ssd1_RBP_eu	0.0412795	0.0632367
gbp2	diploid	ssd1_RBP_aneu	0.240094	0.288112
gis2	diploid	ssd1_aneu	8.82e-37	1.5876e-35
gis2	diploid	RBP_aneu	0.0812438	0.116991
gis2	diploid	ssd1_RBP_eu	0.0201225	0.0321959
gis2	diploid	ssd1_RBP_aneu	0.472918	0.527776
hek2	diploid	ssd1_aneu	8.84e-34	1.27296e-32
hek2	diploid	RBP_aneu	0.476465	0.527776
hek2	diploid	ssd1_RBP_eu	0.3826	0.44431
hek2	diploid	ssd1_RBP_aneu	0.0136551	0.0223448
isw1	diploid	ssd1_aneu	1.91e-32	2.292e-31
isw1	diploid	RBP_aneu	0.175166	0.221262
isw1	diploid	ssd1_RBP_eu	6.35e-12	1.63286e-11
isw1	diploid	ssd1_RBP_aneu	0.0934797	0.129433
mpt5	diploid	ssd1_aneu	4.28e-39	1.5408e-37
mpt5	diploid	RBP_aneu	9.08e-09	2.1089e-08
mpt5	diploid	ssd1_RBP_eu	2.45e-17	8.01818e-17
mpt5	diploid	ssd1_RBP_aneu	2.42e-24	1.24457e-23
mrn1	diploid	ssd1_aneu	5.72e-44	4.1184e-42
mrn1	diploid	RBP_aneu	0.742234	0.785895
mrn1	diploid	ssd1_RBP_eu	0.231126	0.282052
mrn1	diploid	ssd1_RBP_aneu	0.770473	0.803971
nab6	diploid	ssd1_aneu	4.46e-38	1.0704e-36
nab6	diploid	RBP_aneu	0.0573742	0.084305
nab6	diploid	ssd1_RBP_eu	0.000187929	0.000330022
nab6	diploid	ssd1_RBP_aneu	1.72e-14	4.9536e-14
pat1	diploid	ssd1_aneu	5.19e-22	2.076e-21
pat1	diploid	RBP_aneu	7.29e-06	1.41859e-05
pat1	diploid	ssd1_RBP_eu	7.65e-14	2.11846e-13
pat1	diploid	ssd1_RBP_aneu	0.840291	0.864299
pub1	diploid	ssd1_aneu	4.66e-31	3.728e-30
pub1	diploid	RBP_aneu	3.32e-06	6.64e-06
pub1	diploid	ssd1_RBP_eu	0.0878646	0.124044
pub1	diploid	ssd1_RBP_aneu	6.21e-17	1.944e-16
puf6	diploid	ssd1_aneu	9.76e-25	5.40554e-24
puf6	diploid	RBP_aneu	1.49e-09	3.576e-09
puf6	diploid	ssd1_RBP_eu	0.142826	0.186973
puf6	diploid	ssd1_RBP_aneu	8.69e-05	0.00015642
she2	haploid	ssd1_aneu	3.7e-22	1.56706e-21
she2	haploid	RBP_aneu	0.00785849	0.0134717
she2	haploid	ssd1_RBP_eu	0.226926	0.281701
she2	haploid	ssd1_RBP_aneu	0.490769	0.535385
whi3	haploid	ssd1_aneu	3.22e-22	1.449e-21
whi3	haploid	RBP_aneu	5e-07	1.125e-06
whi3	haploid	ssd1_RBP_eu	0.0095707	0.0160254
whi3	haploid	ssd1_RBP_aneu	9.58e-07	2.09018e-06

## Sheet: 6. Liquid growth data
# Table S6: Liquid growth rates, haploid mutants
# Data corresponding to Figure 4C
CCR4
	WT EU	WT ANEU	ssd1 EU	ssd1 ANEU	ccr4 EU	ccr4 ANEU	ssd1 ccr4 EU	ssd1 ccr4 ANEU		predicted ccr4 ANEU	predicted ssd1 ccr4 EU	predicted ssd1 ccr4 ANEU
rep 1	0.0089	0.0077	0.0087	0.0052	0.0063	0.0069	0.006	0.0059		0.00545056	0.00615843	0.00403146
rep 2	0.0091	0.0077	0.009	0.0053	0.0061	0.007	0.006	0.0057		0.00516154	0.00603297	0.00407692
rep 3	0.0089	0.0089	0.0087	0.0053	0.0057	0.007	0.0051	0.006		0.0057	0.00557191	0.00416854
average	0.00896667	0.0081	0.0088	0.00526667	0.00603333	0.00696667	0.0057	0.00586667		0.00543737	0.0059211	0.00409231
stdev	0.00011547	0.00069282	0.000173205	5.7735e-05	0.000305505	5.7735e-05	0.000519615	0.000152753		0.000269473	0.000308846	6.98223e-05
NAB6
	WT EU	WT ANEU	ssd1 EU	ssd1 ANEU	nab6 EU	nab6 ANEU	ssd1 nab6 EU	ssd1 nab6 ANEU		predicted nab6 ANEU	predicted ssd1 nab6 EU	predicted ssd1 nab6 ANEU
rep 1	0.0094	0.0087	0.0089	0.0059	0.0089	0.0084	0.0096	0.0063		0.00823723	0.0084266	0.00527234
rep 2	0.009	0.008	0.0089	0.0052	0.0084	0.0083	0.0088	0.0062		0.00746667	0.00830667	0.00479556
rep 3	0.0088	0.0073	0.0084	0.0051	0.0079	0.0071	0.0079	0.0055		0.00655341	0.00754091	0.00411477
average	0.00906667	0.008	0.00873333	0.0054	0.0084	0.00793333	0.00876667	0.006		0.0074191	0.00809139	0.00472756
stdev	0.000305505	0.0007	0.000288675	0.00043589	0.0005	0.000723418	0.00085049	0.00043589		0.00084292	0.000480487	0.000581772
HEK2
	WT EU	WT ANEU	ssd1 EU	ssd1 ANEU	hek2 EU	hek2 ANEU	ssd1 hek2 EU	ssd1 hek2 ANEU		predicted hek2 ANEU	predicted ssd1 hek2 EU	predicted ssd1 hek2 ANEU
rep 1	0.0088	0.0089	0.0086	0.0054	0.0086	0.0078	0.0081	0.0054		0.00869773	0.00840455	0.00478636
rep 2	0.0092	0.0077	0.0088	0.0057	0.0095	0.0078	0.0089	0.0051		0.00795109	0.00908696	0.00483261
rep 3	0.0096	0.0081	0.009	0.0058	0.0099	0.0081	0.0093	0.0061		0.00835313	0.00928125	0.00489375
average	0.0092	0.00823333	0.0088	0.00563333	0.00933333	0.0079	0.00876667	0.00553333		0.00833398	0.00892425	0.00483757
stdev	0.0004	0.00061101	0.0002	0.000208167	0.000665833	0.000173205	0.00061101	0.00051316		0.000373688	0.000460443	5.38651e-05
PUB1
	WT EU	WT ANEU	ssd1 EU	ssd1 ANEU	pub1 EU	pub1 ANEU	ssd1 pub1 EU	ssd1 pub1 ANEU		predicted pub1 ANEU	predicted ssd1 pub1 EU	predicted ssd1 pub1 ANEU
rep 1	0.0094	0.0087	0.0089	0.0059	0.0092	0.0079	0.0094	0.0057		0.00851489	0.00871064	0.00495851
rep 2	0.009	0.008	0.0089	0.0052	0.0085	0.0078	0.0084	0.0053		0.00755556	0.00840556	0.00450667
rep 3	0.0089	0.0074	0.0084	0.0053	0.0082	0.0071	0.0079	0.0057		0.00681798	0.00773933	0.00422809
average	0.0091	0.00803333	0.00873333	0.00546667	0.00863333	0.0076	0.00856667	0.00556667		0.00762948	0.00828517	0.00456442
stdev	0.000264575	0.000650641	0.000288675	0.000378594	0.00051316	0.00043589	0.000763763	0.00023094		0.00085087	0.00049672	0.00036862
WHI3
[truncated: 32 more rows]

## Sheet: 7. Network data
# Table S7: Network interaction data
FIP1	interacts with	GLC7
GCN20	interacts with	RPS9A
[truncated: 300 more rows]

## Sheet: 8. RBP target PARS scores
# Table S8: Mean PARS scores (see ﻿Kertesz et al. 2010) for the coding region of the denoted transcripts. Note that not all transcripts had data available
[truncated: 11,586 more rows]

[truncated: 1 more sheets: 9. RBP target IUPRED scores]
